# Supplementary material for: Comparative proteomic analysis of human embryonic stem cell-derived and primary human retinal pigment epithelium
Source: PubMed Central journal article supplement (PMC5519552; doi:10.1038/s41598-017-06233-9), 2017-07-20
Supplement: 41598_2017_6233_MOESM1_ESM.pdf [file 41598_2017_6233_MOESM1_ESM.pdf]

# Comparative proteomic analysis of human embryonic stem cell-derived and primary human retinal pigment epithelium

Heidi Hongisto, Antti Jylhä, Janika Nättinen, Jochen Rieck, Tanja Ilmarinen, Zoltán Veréb, Ulla Aapola, Roger Beuerman, Goran Petrovski, Hannu Uusitalo, Heli Skottman

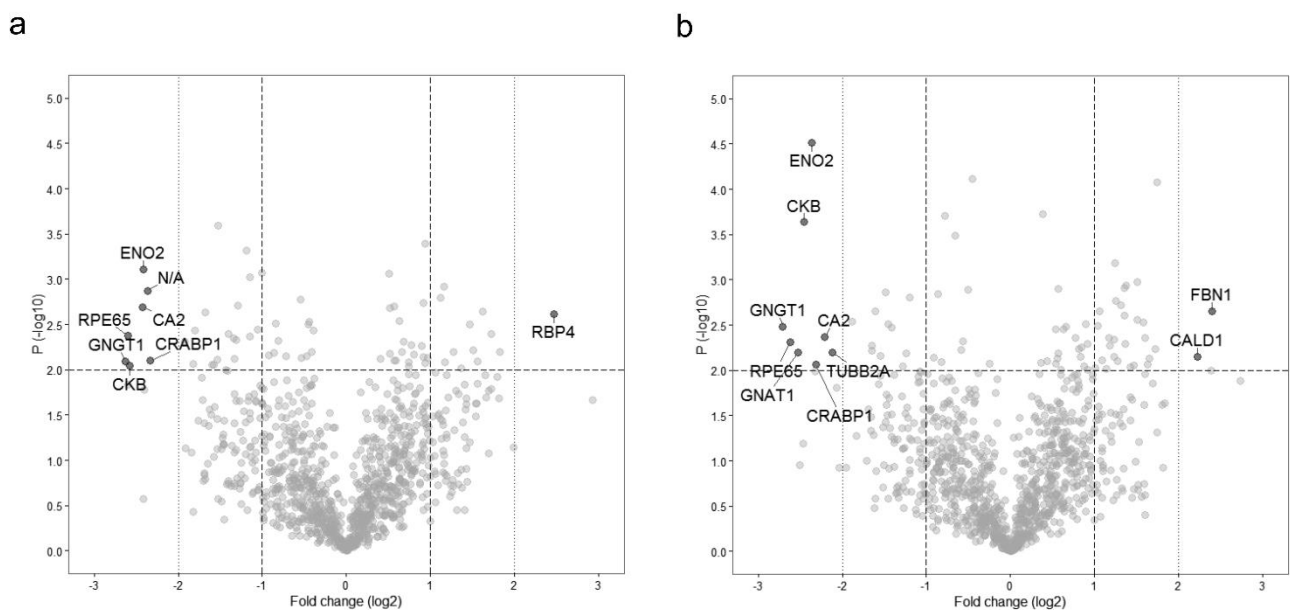

**Supplementary Figure S1.** Volcano plots for a) 08/017 and b) 08/023 hESC-RPE protein expression compared to the hRPE. Fold change values on log<sub>2</sub> scale are shown on the x-axis with fold change of 1 equal to 2-fold difference in the expression (vertical dashed lines) and fold change of 2 equal to 4-fold difference in the expression (vertical dotted lines). Statistical significance (shown as negative log<sub>10</sub> of p-value) for the difference in the expression compared to hRPE for each protein is shown on the y-axis. Student's t-test was used to measure statistical significance and p-value of 0.01 equals to the horizontal dashed line. Average values for the technical replicates were used for the statistics. Proteins with highest expression differences (with a p-value <0.01 and fold difference >4) are labeled.

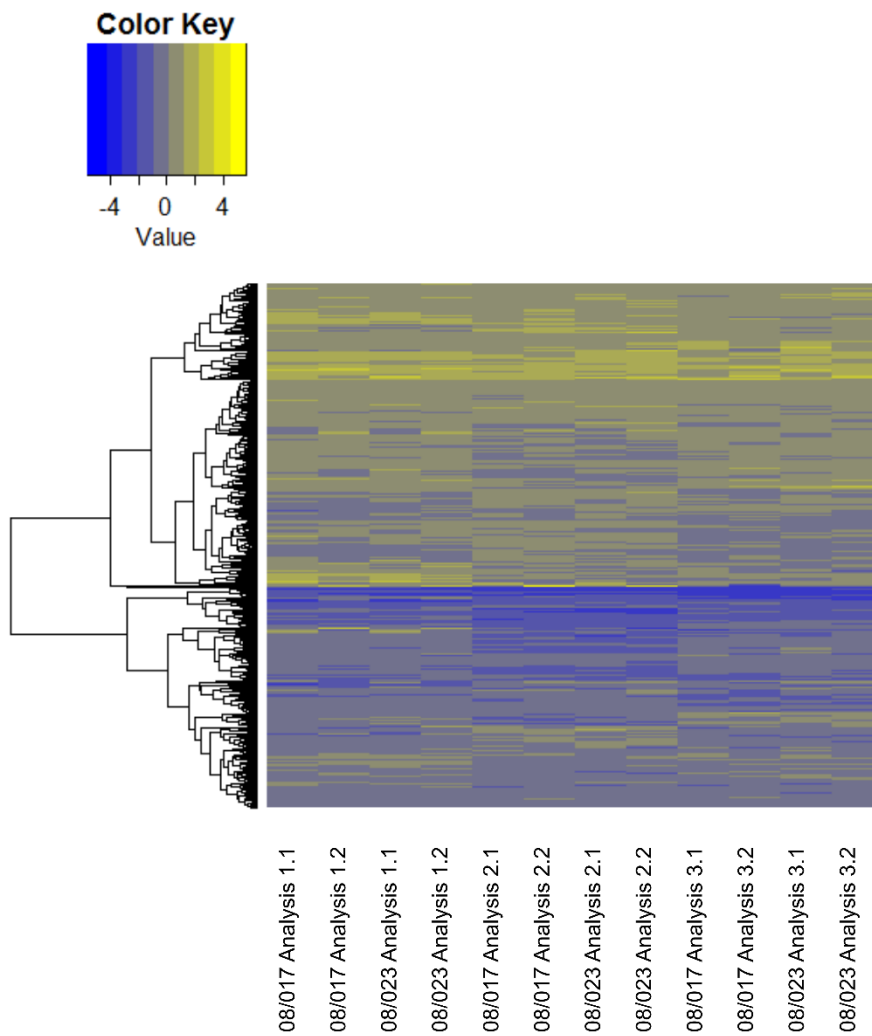

**Supplementary Figure S2.** A heat map showing differences in protein expression comparing the hESC-RPE samples to each of the hrPE donors showing all six technical replicates of the three MS analyses. Only proteins with complete reads (detected in all biological and technical replicates, n=431) are included in the heat map as gaps in the data would reduce readability. Log<sub>2</sub> scale is used for the fold changes. Proteins are clustered based on expression differences (left).

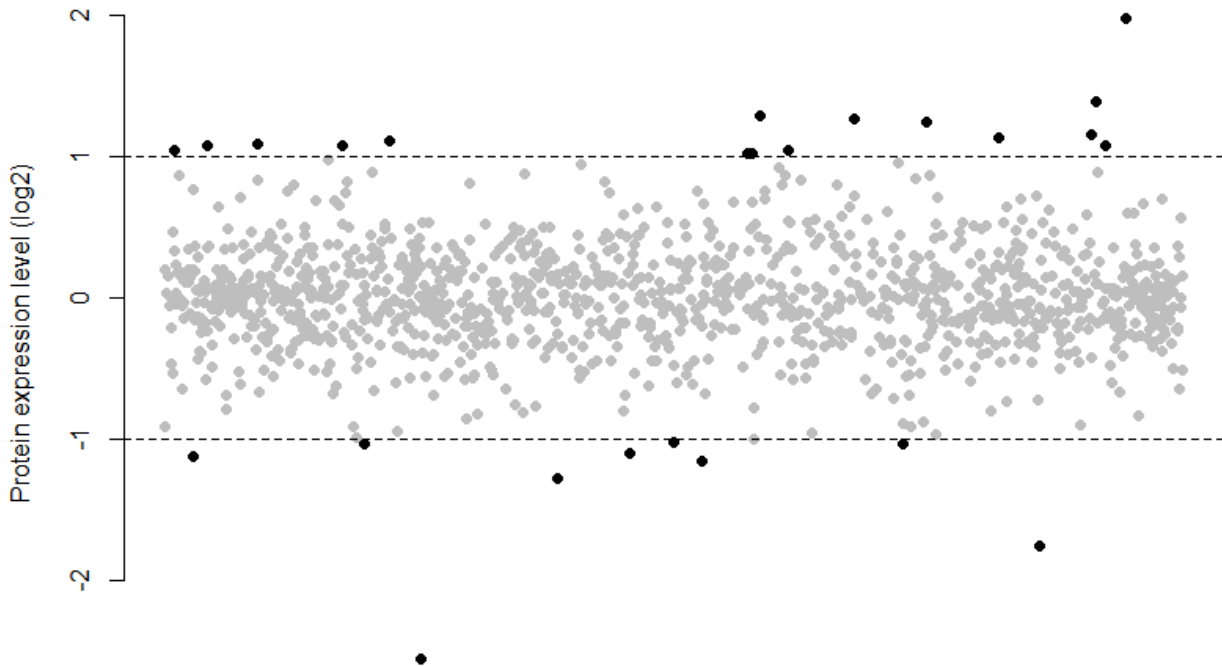

**Supplementary Figure S3.** A scatter plot showing expression levels of the donor sample 1 compared to pooled donor sample from all three hrPE donors on log2 scale. Two technical replicates were analysed and all proteins (also those identified in one technical replicate) were included. Average fold change was taken for those expressed in both technical replicates. Of the 1270 proteins present, only 25 (2%) were differentially expressed (2-fold difference in expression), shown in black.

a

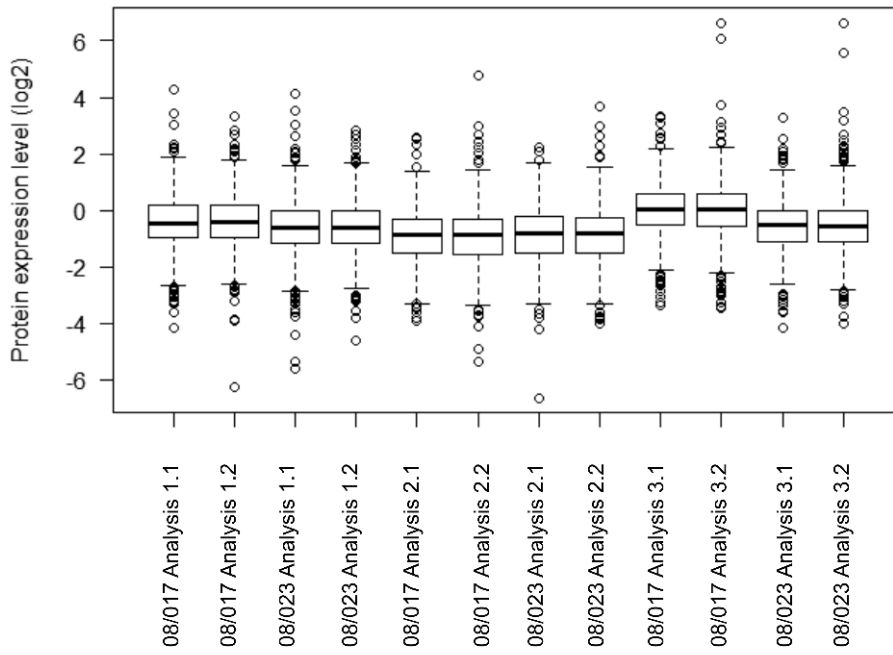

b

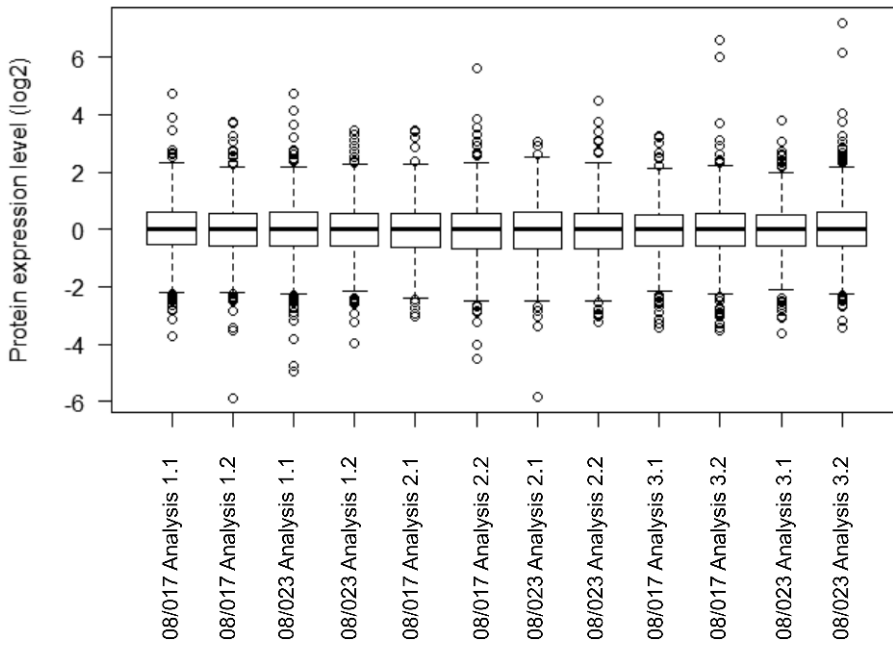

**Supplementary Figure S4.** Boxplots of the data on log<sub>2</sub> scale a) before and b) after central tendency normalization showing all MS analyses and technical replicates.

Supplementary Table S1. Relative expression levels of the proteins for 08/017 and 08/023 hESC-RPE cells compared to hRPE presented for each analysis on log2 scale.

Mean number of peptides used for quantification, technical replicate CV, biological replicate CV, mean fold change, and unadjusted p-value shown for each protein.

Note: CV values are calculated using normal scale, not the log2 scale shown here. Technical replicate CV presents variability in the two MS analyses (1.1 and 1.2; 2.1 and 2.2; 3.1 and 3.2) and biological replicate CV between the biological replicate samples of hESC-RPE and hRPE (1-3).

Proteins in descending order of data completeness. Proteins filtered out shown at the end on pages 12-19.

Proteins included in the final analyses, n=1041

| UniProt | Protein name                                                               | Gene name | Peptide mean | 08/017 hESC-RPE to hRPE |          |          |          |          |          |                        |       |       |               |                           |                             | 08/023 hESC-RPE to hRPE |           |          |          |          |          |                        |       |       |               |                           |                             |
|---------|----------------------------------------------------------------------------|-----------|--------------|-------------------------|----------|----------|----------|----------|----------|------------------------|-------|-------|---------------|---------------------------|-----------------------------|-------------------------|-----------|----------|----------|----------|----------|------------------------|-------|-------|---------------|---------------------------|-----------------------------|
|         |                                                                            |           |              | Analysis                |          |          |          |          |          | Technical replicate CV |       |       | Biological CV | Unadjusted p-value (mean) | Unadjusted p-value (t-test) | Analysis                |           |          |          |          |          | Technical replicate CV |       |       | Biological CV | Unadjusted p-value (mean) | Unadjusted p-value (t-test) |
|         |                                                                            |           |              | 1.1                     | 1.2      | 2.1      | 2.2      | 3.1      | 3.2      | 1                      | 2     | 3     |               |                           |                             | 1.1                     | 1.2       | 2.1      | 2.2      | 3.1      | 3.2      | 1                      | 2     | 3     |               |                           |                             |
| E9PAV3  | Nascent polypeptide-associated complex subunit alpha, muscle-specific form | NACA      | 1.17         | -0.40895                | 0.461363 | -0.1593  | 0.157323 | 0.658828 | 0.700267 | 41.41                  | 15.46 | 2.03  | 26.84         | 0.23                      | 0.40                        | -0.00373                | 1.278032  | 0.404879 | 0.334741 | 0.894945 | 0.436132 | 58.99                  | 3.44  | 22.30 | 14.18         | 0.56                      | 0.03                        |
| O14745  | Na(+)/H(+) exchange regulatory cofactor NHE-RF1                            | SLC9A3R1  | 8.67         | 1.385279                | 1.86852  | 1.280794 | 1.40678  | 1.46048  | 1.42337  | 23.47                  | 6.17  | 1.82  | 10.85         | 1.64                      | 0.09                        | 1.407596                | 1.91543   | 1.841261 | 1.905157 | 1.435272 | 1.267986 | 24.64                  | 3.13  | 8.21  | 17.71         | 1.63                      | 0.01                        |
| O15020  | Spectrin beta chain, non-erythrocytic 2                                    | SPTBN2    | 7.17         | 0.689786                | 0.326325 | 0.678602 | 1.423683 | 0.228302 | 0.513031 | 17.72                  | 35.73 | 13.92 | 27.85         | 0.64                      | 0.09                        | 0.787308                | 0.742157  | 1.513737 | 2.324298 | -0.66314 | 0.60428  | 2.21                   | 37.64 | 58.41 | 67.53         | 0.89                      | 0.26                        |
| O15173  | Membrane-associated progesterone receptor component 2                      | FGFR3C2   | 2.33         | 0.567601                | 0.655982 | 0.594385 | 0.71805  | 0.475136 | 0.484701 | 0.08                   | 6.06  | 0.47  | 6.16          | 0.57                      | 0.01                        | 0.418211                | 0.524127  | 0.313231 | 0.633025 | 0.573406 | 0.871941 | 5.19                   | 15.65 | 14.64 | 10.46         | 0.56                      | 0.02                        |
| O43707  | Alpha-actinin-4                                                            | ACTA4     | 22.83        | 0.61939                 | 0.72729  | 0.608064 | 0.524719 | 0.588709 | 0.307044 | 5.29                   | 3.73  | 13.76 | 7.65          | 0.50                      | 0.01                        | 0.755638                | 0.750495  | 0.94059  | 0.932424 | 0.73818  | 0.902831 | 0.28                   | 2.59  | 8.16  | 17.59         | 0.85                      | 0.01                        |
| O75367  | Core histone macro-H2A.1                                                   | H2AFY     | 6.67         | -0.36798                | -0.6498  | 0.234346 | -0.10396 | -0.27523 | -0.37    | 13.77                  | 16.51 | 5.62  | 21.20         | 0.26                      | 0.27                        | -0.30375                | -0.38142  | 0.720371 | -0.00835 | -0.25936 | -0.37114 | 3.81                   | 34.98 | 5.48  | 31.17         | -0.10                     | 0.00                        |
| O75396  | Vesicle-trafficking protein SEC22b                                         | SEC22B    | 3.67         | 0.34501                 | 0.377927 | -0.21082 | 0.084603 | 0.705351 | 0.276653 | 1.61                   | 14.43 | 20.86 | 19.27         | 0.26                      | 0.26                        | -0.00747                | -0.55411  | 0.132872 | 0.275097 | 0.681532 | 0.024729 | 26.48                  | 6.97  | 31.65 | 21.87         | 0.09                      | 0.68                        |
| O75947  | ATP synthase subunit d, mitochondrial                                      | ATP5H     | 10.83        | -0.43111                | -1.0145  | -1.4123  | -1.40605 | -0.55535 | -1.0898  | 18.10                  | 0.31  | 25.90 | 22.23         | -1.02                     | 0.03                        | -0.72874                | -0.73337  | -1.41765 | -1.43938 | -0.17243 | -0.59995 | 0.23                   | 1.06  | 20.75 | 34.65         | -0.85                     | -0.11                       |
| O95336  | 6-phosphogluconolactonase                                                  | PGLS      | 2.83         | 1.09558                 | 0.586227 | 0.790865 | 1.188078 | 2.148575 | 1.356725 | 24.71                  | 19.35 | 37.86 | 37.71         | 1.19                      | 0.05                        | 1.056718                | 0.83427   | 0.541896 | 1.204035 | 2.60943  | 0.910006 | 10.88                  | 31.90 | 74.83 | 46.30         | 1.19                      | 0.05                        |
| O95831  | Apoptosis-inducing factor 1, mitochondrial                                 | AIFM1     | 10.67        | -0.20686                | -0.55221 | -1.46109 | -0.91167 | -0.53779 | -0.0817  | 16.85                  | 26.61 | 22.17 | 29.75         | -0.63                     | 0.16                        | -0.07465                | -0.46656  | -1.32789 | -0.79849 | -0.46091 | -0.26623 | 19.09                  | 25.66 | 9.70  | 26.80         | 0.57                      | 0.15                        |
| P02489  | Alpha-crystallin A chain                                                   | CRYAA     | 9.67         | -1.10681                | -1.04082 | -2.43148 | -2.1051  | -1.53111 | -1.62654 | 3.23                   | 15.93 | 4.68  | 39.21         | -1.64                     | 0.04                        | -1.06636                | -1.02826  | -1.92145 | -1.96239 | -2.0942  | -1.99325 | 1.87                   | 2.01  | 9.83  | 39.66         | -1.66                     | 0.03                        |
| P02455  | Prelamin A/C                                                               | LMNA      | 20.50        | 0.108504                | 0.455588 | 0.610099 | 0.542927 | -0.31607 | -0.28296 | 16.96                  | 3.29  | 1.62  | 29.08         | 0.19                      | 0.54                        | 0.028853                | 0.188148  | 0.289232 | 0.415668 | -0.19664 | -0.85929 | 7.80                   | 6.19  | 7.08  | 16.48         | 0.11                      | 0.50                        |
| P04040  | Histone H1.0                                                               | H1FO      | 21.17        | -2.04842                | -2.14108 | -0.44693 | -0.49816 | -1.0726  | -1.12142 | 5.70                   | 12.26 | 2.39  | 47.16         | -1.25                     | 0.11                        | -1.58474                | -1.29022  | -0.69564 | -0.69477 | -1.5761  | -1.44209 | 14.39                  | 0.04  | 4.56  | 33.18         | -1.21                     | 0.04                        |
| P07373  | Profilin-1                                                                 | PFN1      | 10.00        | 0.757371                | 0.545318 | 0.405597 | 0.951848 | 1.437388 | 0.893868 | 10.37                  | 9.28  | 26.33 | 26.22         | 0.77                      | 0.06                        | 0.731521                | 0.68738   | 1.07846  | 1.253985 | 1.55453  | 0.924521 | 2.16                   | 1.16  | 29.93 | 33.82         | 1.04                      | 0.03                        |
| P07919  | Cytochrome b-c1 complex subunit 6, mitochondrial                           | UOCHR     | 2.33         | -0.46822                | -1.22379 | -1.26872 | -1.68158 | -0.0779  | -0.8711  | 26.90                  | 20.10 | 37.93 | 35.22         | -0.97                     | 0.08                        | -1.07742                | -0.93389  | -0.10552 | -1.43187 | -0.04239 | -0.70454 | 7.03                   | 20.27 | 31.90 | 43.37         | 0.03                      | 0.08                        |
| P07954  | Fumarate hydratase, mitochondrial                                          | FH        | 8.33         | -0.45165                | -0.2338  | -1.80563 | -0.95497 | -0.94521 | -0.43879 | 10.66                  | 40.53 | 24.57 | 32.27         | -0.81                     | 0.12                        | -0.25247                | -0.15232  | -1.66242 | -1.00126 | -1.0661  | -0.8117  | 4.91                   | 31.85 | 14.40 | 41.76         | -0.83                     | 0.13                        |
| P08708  | 40S ribosomal protein S17                                                  | RPS17     | 2.67         | 1.938882                | 0.249525 | 0.234346 | 0.155194 | 0.515203 | -0.62458 | 74.48                  | 3.88  | 53.13 | 52.47         | 0.41                      | 0.36                        | 1.060611                | 0.031603  | -0.34707 | -0.05504 | 0.053981 | -1.23641 | 48.40                  | 14.26 | 59.40 | 40.30         | 0.83                      | 0.03                        |
| P09382  | Galactin-1                                                                 | LGAL1     | 6.83         | 0.763182                | 0.70359  | 0.594034 | 0.297339 | 0.751501 | 0.874264 | 2.92                   | 14.49 | 6.01  | 12.70         | 0.66                      | 0.03                        | 0.638025                | 0.687653  | 1.158265 | 0.737521 | 1.134361 | 1.219714 | 2.43                   | 20.48 | 4.18  | 17.59         | 0.93                      | 0.02                        |
| P09417  | Dihydropteridine reductase                                                 | ODR       | 4.00         | -0.10608                | -0.28538 | -0.46511 | 0.14068  | -0.17383 | 0.147772 | 9.04                   | 29.26 | 15.70 | 6.65          | -0.12                     | 0.16                        | -0.2836                 | -0.04226  | -0.31209 | -0.07271 | -0.39064 | 0.13178  | 11.80                  | 11.71 | 25.33 | 28.77         | -0.16                     | 0.01                        |
| P10606  | Cytochrome c oxidase subunit 1, mitochondrial                              | CXO5B     | 5.00         | -0.76492                | -0.42163 | -1.31545 | -1.22569 | -0.37431 | -0.31631 | 16.75                  | 4.40  | 2.61  | 30.45         | -0.74                     | 0.12                        | -0.81708                | -0.40137  | -1.24758 | -1.54514 | -1.85102 | -2.37133 | 57.30                  | 19.69 | 22.66 | 13.43         | -1.89                     | 0.00                        |
| P10745  | Retinol-binding protein 3                                                  | RBP3      | 23.67        | -2.2667                 | -1.0768  | -1.76993 | -1.6656  | -1.88047 | -1.25288 | 55.22                  | 4.67  | 13.48 | 15.74         | -1.80                     | 0.00                        | -0.458473               | -0.706411 | 1.048766 | 0.292303 | 0.114252 | 0.503375 | 2.35                   | 36.25 | 18.96 | 14.53         | 0.55                      | 0.05                        |
| P11177  | Pyruvate dehydrogenase E1 component subunit beta, mitochondrial            | PDHFB     | 9.50         | -0.17273                | -0.02508 | -1.17208 | -0.63089 | -0.84589 | -1.00095 | 7.22                   | 26.23 | 7.59  | 34.40         | -0.64                     | 0.14                        | -0.25273                | 0.014253  | -0.73705 | -0.73699 | 1.08935  | -0.66022 | 13.05                  | 2.13  | 20.88 | 29.55         | -0.58                     | 0.13                        |
| P11216  | Glycogen phosphorylase, brain form                                         | PYGB      | 10.83        | -0.16985                | -0.32193 | 0.151579 | 0.173309 | -0.59661 | -0.02021 | 7.45                   | 1.07  | 27.88 | 17.75         | -0.13                     | 0.47                        | 0.47104                 | -0.32568  | -0.24278 | 0.048144 | -0.07817 | -0.41786 | 7.12                   | 14.21 | 16.57 | 10.59         | -0.25                     | 0.10                        |
| P12225  | ADP/ATP translocase 1                                                      | SLC25A4   | 14.50        | -0.24764                | -0.90209 | -0.06035 | -1.51109 | -1.47486 | -0.79508 | 16.72                  | 26.60 | 32.71 | 45.75         | -1.11                     | 0.11                        | -0.25221                | -0.62269  | -1.06121 | -1.79629 | -1.32027 | -0.86412 | 18.06                  | 25.91 | 22.17 | 51.45         | -1.20                     | 0.03                        |
| P12271  | Retinaldehyde-binding protein 1                                            | RBP1      | 19.50        | -0.85143                | -0.83922 | -1.04934 | -0.91068 | -1.32655 | -1.45245 | 0.60                   | 6.79  | 6.17  | 18.47         | -1.07                     | 0.02                        | -0.8373                 | -0.7701   | -1.1841  | -1.14454 | -1.13222 | -0.86295 | 3.29                   | 1.94  | 13.16 | 12.52         | -0.99                     | 0.01                        |
| P12532  | Creatine kinase U-type, mitochondrial                                      | CKMT1A    | 14.00        | -1.43373                | -0.96512 | -3.03515 | -2.8866  | -1.04378 | -1.70639 | 22.77                  | 7.27  | 31.92 | 52.47         | -1.85                     | 0.08                        | -1.41972                | -0.94276  | -2.85861 | -2.4881  | -1.38739 | -1.9238  | 23.17                  | 10.06 | 25.99 | 46.86         | -1.84                     | 0.05                        |
| P13010  | X-ray repair cross-complementing protein 5                                 | XRCC5     | 10.83        | -0.45948                | -0.18875 | 0.546371 | 0.330423 | -0.53273 | -0.66524 | 13.23                  | 10.56 | 6.49  | 39.23         | -0.16                     | 0.65                        | -0.52016                | -0.26802  | 0.286213 | -0.00759 | -0.47471 | -0.75676 | 12.33                  | 14.35 | 0.46  | 31.84         | 0.34                      | 0.32                        |
| P13073  | Cytochrome c oxidase subunit 4 isoform 1, mitochondrial                    | COX4I1    | 3.83         | -0.70497                | -1.24883 | -1.28477 | -1.50434 | -1.08174 | -0.73786 | 26.34                  | 10.74 | 16.78 | 17.63         | -1.09                     | 0.02                        | -0.81284                | -1.18878  | -1.23383 | -1.16816 | -0.71854 | -0.57132 | 18.32                  | 3.22  | 7.21  | 19.84         | -0.95                     | 0.03                        |
| P13639  | Elongation factor 2                                                        | EEF2      | 13.67        | 0.923397                | 0.02176  | 0.157294 | 0.67922  | 0.698563 | 1.17119  | 4.82                   | 25.20 | 22.96 | 19.56         | 0.77                      | 0.05                        | 0.102826                | 1.300535  | 0.919886 | 0.70622  | 0.88423  | 1.240613 | 5.28                   | 25.63 | 17.38 | 22.00         | 0.87                      | 0.05                        |
| P13804  | Electron transfer flavoprotein subunit alpha, mitochondrial                | ETF       | 9.67         | 0.373704                | 0.211832 | -0.16137 | -0.45617 | -0.5821  | -0.37089 | 7.93                   | 14.40 | 10.33 | 29.35         | -0.16                     | 0.55                        | 0.571861                | 0.0496    | -0.47184 | -0.69151 | -0.24022 | -0.15836 | 22.74                  | 11.45 | 12.32 | 31.81         | -0.19                     | 0.53                        |
| P13871  | ATP synthase subunit delta1                                                | ATP5B1    | 3.61         | -0.48959                | -0.75287 | -1.7401  | -1.40256 | -0.64549 | -0.46149 | 16.87                  | 19.55 | 10.29 | 39.55         | -0.01                     | 0.07                        | -0.70678                | -0.57428  | -0.69564 | -0.69477 | -0.10021 | -0.26129 | 6.39                   | 9.07  | 3.79  | 30.01         | -0.68                     | 0.08                        |
| P16152  | Carbonyl reductase [NADPH] 1                                               | CBR1      | 7.00         | 0.798563                | 0.41499  | -0.27737 | 0.119481 | 0.37003  | 0.993179 | 18.69                  | 19.33 | 1.13  | 23.10         | 0.30                      | 0.27                        | 0.59834                 | 0.265512  | 0.381176 | 0.423404 | 0.157164 | 0.211232 | 16.34                  | 20.07 | 2.65  | 9.32          | 0.34                      | 0.05                        |
| P16499  | Rod cGMP-specific 3'-5'-cyclic phosphodiesterase subunit alpha             | PDE6A     | 16.67        | -1.19825                | -1.05101 | -1.76993 | -1.48946 | -0.80233 | -1.02078 | 7.21                   | 13.27 | 10.69 | 23.94         | -1.22                     | 0.03                        | -1.40282                | -0.90307  | -1.57236 | -1.65291 | -0.45239 | -1.39741 | 24.25                  | 3.95  | 44.73 | 25.63         | -1.23                     | 0.03                        |
| P17174  | Aspartate aminotransferase, cytoplasmic                                    | GOT1      | 7.83         | 0.029036                | -0.29769 | -0.30887 | -0.28516 | -0.39677 | -0.12081 | 15.95                  | 1.16  | 13.48 | 6.26          | -1.23                     | 0.04                        | 0.127629                | -0.05915  | -0.33139 | 0.159654 | -0.28055 | -0.303   | 9.14                   | 23.84 | 1.10  | 11.41         | 0.35                      | 0.26                        |
| P17643  | 5,6-dihydroxyindole-2-carboxylic acid oxidase                              | TYRP1     | 5.00         | 1.90488                 | 1.885831 | 0.852643 | 1.55571  | 0.947329 | 1.357271 | 0.87                   | 33.79 | 19.94 | 29.37         | 1.42                      | 0.03                        | 1.238022                | 1.159827  | 0.815897 | 0.686062 | 0.527665 | 1.128748 | 3.83                   | 6.36  | 29.04 | 16.69         | 0.93                      | 0.02                        |
| P17858  | ATP-dependent 6-phosphofruktokinase, liver type                            | PFKL      | 7.83         | 0.191439                | 0.11787  | 0.075391 | 0.364814 | 0.048183 | 0.242921 | 3.61                   | 14.14 | 9.53  | 30.03         | -0.16                     | 0.65                        | -0.06377                | 0.312776  | 0.29614  | 0.323895 | 0.175406 | 0.311593 | 12.05                  | 1.36  | 6.67  | 4.01          | 0.25                      | 0.02                        |
| P17987  | T-complex protein 1 subunit alpha                                          | TCP1      | 8.50         | -0.18097                | -0.30213 | -0.04059 | -0.07285 | -0.03059 | -0.03635 | 5.94                   | 1.58  | 0.28  | 7.68          | 0.11                      | 0.24                        | -0.2118                 | 0.024255  | 0.086435 | -0.05137 | -0.724   | -0.62876 | 11.54                  | 6.75  | 4.67  | 23.93         | -0.25                     | 0.06                        |
| P21281  | V-type proton ATPase subunit B, brain isoform                              | ATP6V1B2  | 12.33        | -0.24158                | -0.6087  | -0.20165 | -0.64155 | -0.23832 | -0.35163 | 17.90                  | 21.40 | 5.    |               |                           |                             |                         |           |          |          |          |          |                        |       |       |               |                           |                             |

| UniProt    | Protein name                                               | Gene name | Peptide mean | Analysis |          |          |          |          |          | Technical replicate CV |       |       | Biological CV | Fold change (mean) | Unadjusted p-value (t-test) | 08/023 HESC-RPE to hRP6 |          |          |          |           |           | Fold change (mean) | Unadjusted p-value (t-test) |       |       |       |      |
|------------|------------------------------------------------------------|-----------|--------------|----------|----------|----------|----------|----------|----------|------------------------|-------|-------|---------------|--------------------|-----------------------------|-------------------------|----------|----------|----------|-----------|-----------|--------------------|-----------------------------|-------|-------|-------|------|
|            |                                                            |           |              | 1.1      | 1.2      | 2.1      | 2.2      | 3.1      | 3.2      | 1                      | 2     | 3     |               |                    |                             | 1.1                     | 1.2      | 2.1      | 2.2      | 3.1       | 3.2       |                    |                             |       |       |       |      |
|            |                                                            |           |              | 1        | 2        | 3        | 4        | 5        | 6        | 7                      | 8     | 9     |               |                    |                             | 10                      | 11       | 12       | 13       | 14        | 15        |                    |                             |       |       |       |      |
| P68366     | Tubulin alpha-4A chain                                     | TUBA4A    | 38.00        | -1.32715 | -1       | -0.75421 | -0.2128  | -1.78633 | -1.73904 | 15.97                  | 26.23 | 2.32  | 44.74         | -1.14              | 0.09                        | -1.45713                | -1.18026 | -1.12208 | -0.45833 | -1.07534  | -1.63473  | 13.53              | 14.43                       | 27.08 | 44.07 | -0.99 | 0.10 |
| P78363     | Retinol-specific ATP-binding cassette transporter          | ABCA4     | 23.00        | -0.59029 | -0.29793 | -1.20439 | -1.87592 | -0.25724 | -2.21216 | 14.28                  | 32.33 | 83.43 | 35.81         | 8.00               | 0.07                        | -1.27589                | -0.31303 | -0.26024 | -1.6753  | -1.70454  | -0.69376  | 45.52              | 21.56                       | 41.14 | 40.75 | -0.84 | 0.11 |
| P75827     | DNA-dependent protein kinase catalytic subunit             | PKKDC     | 6.50         | -0.64218 | 0.24184  | 0.319222 | 0.138766 | 0.028582 | -0.36686 | 42.02                  | 8.83  | 19.26 | 15.67         | -0.05              | 0.77                        | 0.210069                | -0.74403 | -0.61591 | -0.2649  | 0.19143   | -0.38673  | 45.13              | 17.12                       | 27.96 | 12.46 | -0.27 | 0.11 |
| P80723     | Brain acid soluble protein 1                               | BASP1     | 8.17         | -0.8852  | -0.55416 | -0.64573 | -0.58707 | -1.02119 | -1.37307 | 16.15                  | 2.87  | 17.16 | 19.91         | 0.85               | 0.04                        | -0.77561                | -0.37684 | -0.19333 | -0.21865 | -0.8713   | -1.45201  | 19.42              | 1.24                        | 28.08 | 30.84 | -0.65 | 0.15 |
| Q01813     | ATP-dependent 6-phosphofructokinase, platelet type         | PFKP      | 10.50        | -0.13809 | -0.32559 | 0.372812 | 0.09772  | 0.5848   | 0.370616 | 9.08                   | 13.44 | 7.48  | 30.29         | 0.22               | 0.03                        | -0.26231                | -0.09424 | 0.13771  | -0.07298 | 0.403411  | -1.230156 | 8.27               | 10.31                       | 8.48  | 17.38 | -0.76 | 0.73 |
| C00252     | A-kinase anchor protein 2                                  | AKAP12    | 5.83         | -1.04377 | -0.11514 | -1.56313 | -0.78589 | -1.69751 | -0.55086 | 41.78                  | 37.20 | 53.43 | 22.50         | -0.97              | 0.03                        | -0.54296                | -0.41012 | -0.86459 | -0.27892 | -1.33585  | -1.19465  | 5.61               | 28.32                       | 6.92  | 27.36 | -0.77 | 0.09 |
| C05295     | Rod outer segment membrane protein 1                       | ROM1      | 6.83         | -0.35609 | -0.19919 | -1.78174 | -2.45104 | -0.14074 | -0.26859 | 17.64                  | 12.19 | 19.75 | 16.65         | -0.88              | 0.23                        | -0.3203                 | -0.89403 | -0.58423 | -0.39433 | -0.97449  | -0.69758  | 16.28              | 25.8                        | 41.39 | 40.07 | -1.28 | 0.23 |
| Q07954     | Protein density lipoprotein receptor-related protein 1     | LRP1      | 2.50         | 0.663037 | 0.475935 | -0.04332 | 0.42437  | 0.532895 | 0.159888 | 10.81                  | 22.72 | 18.20 | 10.65         | 0.40               | 0.00                        | 0.496389                | 0.197595 | -0.02888 | -0.30674 | 0.982944  | 0.239344  | 24.21              | 13.58                       | 28.66 | 27.42 | 0.30  | 0.34 |
| Q07960     | Rho GTPase-activating protein 1                            | RHAGAP1   | 6.17         | 0.852234 | 1.00315  | 1.114845 | 0.585538 | 0.143268 | 0.716386 | 8.71                   | 25.66 | 27.60 | 17.30         | 0.74               | 0.04                        | 0.941074                | 0.71771  | 0.271292 | 0.151498 | 0.844247  | 1.472307  | 10.93              | 27.57                       | 30.31 | 29.48 | 0.74  | 0.06 |
| Q08211     | ATP-dependent RNA helicase A                               | DHX9      | 7.83         | 0.265362 | 0.161633 | -0.15723 | 0.47608  | -0.06293 | -0.23659 | 5.08                   | 30.55 | 5.80  | 13.47         | 0.07               | 0.58                        | 0.206655                | 0.397523 | -0.08388 | -0.17869 | 0.33637   | -0.23793  | 9.34               | 4.65                        | 4.82  | 23.04 | 0.04  | 0.85 |
| Q09666     | Neuroblast differentiation-associated protein AHNAK        | AHNAK     | 21.50        | -0.04722 | -0.2145  | -0.17597 | -0.14069 | -0.65617 | -0.52056 | 8.19                   | 1.73  | 6.64  | 16.80         | 0.29               | 0.19                        | 0.058403                | -0.11892 | 0.66734  | 0.7961   | -0.07927  | -0.08045  | 8.68               | 6.31                        | 0.06  | 33.74 | 0.21  | 0.51 |
| Q12797     | Asparyl/asparaginyl beta-hydroxylase                       | ASPH      | 4.67         | -0.57878 | -0.62675 | -0.11098 | -0.38078 | -0.92013 | -1.06416 | 2.35                   | 13.19 | 7.05  | 25.70         | -0.61              | 0.10                        | -0.05403                | -0.5632  | -0.43466 | -0.57904 | 0.36831   | -0.4915   | 24.76              | 7.07                        | 6.83  | 7.77  | -0.42 | 0.02 |
| Q13011     | Delta(3,5)-Delta(2,4)-dienoyl-CoA isomerase, mitochondrial | ECHI      | 7.67         | 0.906696 | 0.954098 | 0.323253 | 0.249797 | 0.304645 | 1.382594 | 2.62                   | 3.60  | 50.51 | 23.75         | 0.69               | 0.08                        | 1.001861                | 1.141964 | -0.0812  | -0.30987 | 0.321722  | 1.126298  | 6.80               | 11.18                       | 38.44 | 40.11 | 0.53  | 0.23 |
| Q13885     | Tubulin beta-2A chain                                      | TUBB2A    | 44.67        | -2.39853 | -1.94854 | -1.88467 | -1.53993 | -1.81408 | -1.95273 | 21.88                  | 16.82 | 6.79  | 15.55         | -1.92              | 0.00                        | -2.43564                | -2.43821 | -2.19599 | -1.91594 | -1.60286  | -1.22856  | 0.13               | 11.91                       | 25.48 | 20.21 | -2.11 | 0.01 |
| Q14204     | Cytoplasmic dynein 1 heavy chain 1                         | DYNC1H1   | 19.83        | -0.0077  | 0.604321 | -0.38124 | 1.450071 | 0.06592  | 0.419271 | 29.55                  | 79.38 | 17.07 | 21.84         | 0.36               | 0.06                        | -0.00791                | -0.92597 | -0.80192 | 1.240047 | 0.365554  | 0.335884  | 44.09              | 86.40                       | 1.45  | 7.69  | 0.34  | 0.04 |
| Q14240     | Eukaryotic initiation factor 4A-I1                         | EIF4A2    | 5.17         | 0.214186 | 0.451124 | 0.422901 | 0.639504 | 0.278643 | 0.105335 | 11.59                  | 10.60 | 8.22  | 12.12         | 0.35               | 0.07                        | 0.213853                | 0.228016 | 0.328342 | 0.444512 | 0.396359  | 0.077016  | 0.69               | 5.49                        | 15.59 | 6.33  | 0.28  | 0.03 |
| Q14271     | Retinoid isomerase 2                                       | RIS2      | 4.87         | 1.195828 | 0.227348 | 0.45193  | 0.05248  | -0.38951 | -0.01096 | 9.02                   | 24.88 | 18.06 | 34.53         | 0.24               | 0.47                        | 0.008085                | 0.026853 | 0.346983 | 0.194866 | 0.104956  | 0.492     | 6.63               | 8.50                        | 13.91 | 14.92 | 0.24  | 0.12 |
| Q14894     | Ketimine reductase mu-crystallin                           | KRYM      | 11.67        | -0.86643 | -1.37756 | -1.5491  | -1.54607 | -1.75674 | -1.36213 | 24.88                  | 10.5  | 19.22 | 18.76         | -0.11              | 0.01                        | -0.75734                | -1.10344 | -1.65602 | -1.83448 | -2.00435  | -1.0402   | 16.88              | 8.74                        | 29.00 | 33.80 | -1.49 | 0.03 |
| Q15084     | Protein disulfide-isomerase A6                             | PDIA6     | 11.33        | 0.975682 | 1.075533 | 0.578321 | 0.601958 | 0.943917 | 0.659958 | 4.89                   | 11.6  | 13.87 | 15.07         | 0.81               | 0.02                        | 0.944266                | 0.906229 | 0.374164 | 0.374021 | 0.886021  | 0.72019   | 1.86               | 0.01                        | 8.12  | 19.04 | 0.70  | 0.05 |
| Q15149     | Plectin                                                    | PLEC      | 25.83        | 0.608716 | 0.748574 | 0.569239 | 0.913077 | 0.521546 | 0.599028 | 6.85                   | 16.77 | 3.80  | 6.62          | 0.66               | 0.01                        | 0.418539                | 0.92492  | 0.79315  | 1.175829 | 0.677529  | 0.8457    | 24.57              | 18.65                       | 8.23  | 11.26 | 0.81  | 0.01 |
| Q16158     | Retinol isomethyltransferase                               | REPE5     | 24.67        | -2.31095 | -2.40194 | -0.20432 | -2.82179 | -2.6966  | -2.3266  | 4.46                   | 9.91  | 18.04 | 19.32         | -2.60              | 0.00                        | -2.48018                | -2.37398 | -3.10347 | -2.94966 | -2.64868  | -2.2344   | 5.20               | 3.13                        | 20.08 | 16.94 | -2.62 | 0.00 |
| Q5KU26     | Colectin-12                                                | COLECT12  | 2.67         | 1.855229 | 1.554266 | 0.775154 | 1.569551 | 1.270517 | 0.994904 | 14.70                  | 37.98 | 13.47 | 22.44         | 1.34               | 0.02                        | 2.15145                 | 1.633213 | 1.20281  | 1.214668 | 1.788893  | 1.007687  | 25.13              | 43.71                       | 37.38 | 20.61 | -1.65 | 0.01 |
| Q6ZVX7     | F-box only protein 50                                      | NCRP1     | 2.33         | 1.517464 | 1.042644 | 1.845506 | 1.644994 | 0.370895 | 2.912346 | 23.06                  | 9.81  | 99.96 | 28.60         | 1.56               | 0.01                        | 2.369177                | 1.450086 | 1.052187 | 1.605343 | 0.454857  | 2.690151  | 45.38              | 26.78                       | 91.87 | 22.82 | -1.60 | 0.01 |
| Q7U1U9     | Histone H2A.1                                              | H2AFV     | 5.17         | -1.97109 | -1.24613 | -1.28671 | -1.74821 | -0.97512 | -0.66367 | 16.54                  | 22.43 | 15.21 | 43.41         | -1.47              | 0.06                        | -1.62405                | -1.8822  | -0.81879 | -1.61531 | -1.63911  | -1.67723  | 12.62              | 38.08                       | 2.85  | 23.08 | -1.55 | 0.01 |
| Q8B9X0     | Saccharoline dehydrogenase-like oxidoreductase             | SDOH      | 6.00         | -0.53789 | -0.15817 | -0.87773 | -0.82631 | -0.76955 | -0.05429 | 23.27                  | 0.91  | 34.36 | 17.12         | -0.55              | 0.04                        | -0.46299                | -0.19431 | -0.89574 | -0.53556 | -0.581335 | -1.10903  | 17.35              | 11.61                       | 25.58 | 17.09 | -0.64 | 0.04 |
| Q8TC12     | Retinol dehydrogenase 11                                   | RHD11     | 4.00         | -0.35634 | -0.60292 | 0.756    | -0.72536 | -0.10576 | -0.1664  | 1.50                   | 2.97  | 15.03 | 15.03         | -0.12              | 0.12                        | 0.57655                 | -0.74256 | 0.66522  | -1.04641 | -0.03792  | -0.49487  | 8.13               | 18.58                       | 20.55 | 22.52 | -0.59 | 0.08 |
| Q9AFJ2     | Dynein light chain 2, cytoplasmic                          | DYNLL2    | 3.00         | -0.7367  | -1.00523 | -0.56391 | -0.51636 | -1.15557 | -1.92126 | 13.12                  | 23.3  | 3.75  | 24.76         | -0.25              | 0.13                        | -0.31134                | -0.8327  | -0.86736 | -0.48139 | -0.55377  | -0.48609  | 25.28              | 18.81                       | 3.32  | 5.13  | -0.59 | 0.01 |
| Q9AG03     | Phosphoglucomutase-2                                       | PGM2      | 6.67         | -0.26504 | -0.16165 | -0.72019 | -0.98179 | -0.72128 | -1.16894 | 21.95                  | 12.79 | 13.92 | 18.16         | -0.27              | 0.03                        | -0.41855                | -0.74699 | -0.59346 | -0.89843 | -0.96951  | -1.2344   | 16.03              | 14.85                       | 12.95 | 17.45 | -0.81 | 0.03 |
| Q96NY7     | Chloride intracellular channel protein 6                   | CLIC6     | 5.67         | 1.537945 | 1.458189 | 0.726324 | 0.776623 | 1.792673 | 0.45583  | 3.91                   | 2.47  | 61.20 | 25.06         | 1.17               | 0.03                        | 0.96944                 | 0.98003  | 1.57946  | 1.744541 | 1.89277   | 0.686664  | 0.52               | 0.56                        | 5.12  | 26.24 | 1.34  | 0.03 |
| Q9BRX8     | Redox-regulatory protein FAM213A                           | FAM213A   | 5.00         | -0.30364 | -0.55835 | -0.77447 | -0.55767 | -0.0704  | 0.015184 | 25.58                  | 10.61 | 18.04 | 21.52         | -0.33              | 0.22                        | 0.010405                | -0.48463 | -0.82819 | -0.74337 | 0.166958  | -0.03741  | 24.01              | 4.16                        | 10.00 | 28.40 | -0.32 | 0.33 |
| Q9BS26     | Endoplasmic reticulum resident protein 44                  | ERP44     | 3.50         | 2.191439 | 0.534874 | 0.201991 | 0.252455 | 0.178898 | 0.447253 | 73.31                  | 2.47  | 13.12 | 57.46         | 0.63               | 0.22                        | 1.995391                | 0.624592 | 1.024539 | 0.339535 | 0.154379  | 0.26032   | 62.55              | 10.52                       | 10.00 | 54.30 | -0.58 | 0.01 |
| Q9P035     | Very-long-chain (3R)-3-hydroxyacyl-CoA dehydratase 3       | HADC3     | 4.17         | -0.05068 | 0.080299 | -0.5063  | -0.79456 | 0.044664 | -0.71727 | 6.42                   | 14.08 | 36.50 | 22.53         | -0.32              | 0.23                        | -0.74113                | -1.02097 | -0.93112 | -1.17498 | -1.61941  | -0.40363  | 30.78              | 26.35                       | 31.45 | 20.67 | -0.54 | 0.10 |
| Q9UHL4     | Dipeptidyl peptidase 2                                     | DPPI2     | 5.50         | 1.594837 | 0.968624 | 0.818482 | 0.768134 | 0.946168 | 0.392964 | 30.22                  | 2.47  | 26.79 | 24.25         | 0.91               | 0.04                        | 1.592466                | 0.93579  | 0.167855 | 0.662341 | 0.619761  | 0.578991  | 31.64              | 22.57                       | 2.00  | 33.46 | -0.76 | 0.10 |
| Q9V257     | Voltage-dependent anion-selective channel protein 3        | VDAC3     | 7.47         | -0.49128 | -0.58943 | -0.54233 | -0.52992 | -0.20878 | -0.42639 | 14.51                  | 12.88 | 10.65 | 23.18         | -0.66              | 0.08                        | -0.46299                | -0.19104 | -1.10    | -0.88045 | -0.56903  | -0.3301   | 23.89              | 10.21                       | 21.21 | 22.94 | -1.04 | 0.00 |
| Q9Y490     | Talin-1                                                    | TLN1      | 12.67        | 0.72121  | 1.513624 | 0.949289 | 1.889034 | 0.997622 | 1.045694 | 37.89                  | 40.93 | 23.23 | 15.03         | 0.97               | 0.01                        | 0.899862                | 0.95615  | 0.565022 | 1.52893  | 0.94343   | 1.168956  | 7.76               | 44.60                       | 16.61 | 7.85  | -1.04 | 0.00 |
| AA0A24QZN7 | Chromosome 10 open reading frame 70, isoform CRA_b         |           |              |          |          |          |          |          |          |                        |       |       |               |                    |                             |                         |          |          |          |           |           |                    |                             |       |       |       |      |

| UniProt | Protein name                                                                   | Gene name      | Peptide mean | 08/017 hESC-RPE to hRPE |           |           |           |           |           |                        |       |       |            |                    |                             | 08/023 hESC-RPE to hRPE |          |          |           |          |          |                        |       |       |            |                    |                             |
|---------|--------------------------------------------------------------------------------|----------------|--------------|-------------------------|-----------|-----------|-----------|-----------|-----------|------------------------|-------|-------|------------|--------------------|-----------------------------|-------------------------|----------|----------|-----------|----------|----------|------------------------|-------|-------|------------|--------------------|-----------------------------|
|         |                                                                                |                |              | Analysis                |           |           |           |           |           | Technical replicate CV |       |       | Biological | Fold change (mean) | Unadjusted p-value (t-test) | Analysis                |          |          |           |          |          | Technical replicate CV |       |       | Biological | Fold change (mean) | Unadjusted p-value (t-test) |
|         |                                                                                |                |              | 1.1                     | 1.2       | 2.1       | 2.2       | 3.1       | 3.2       | 1                      | 2     | 3     | CV         |                    |                             | 1.1                     | 1.2      | 2.1      | 2.2       | 3.1      | 3.2      | 1                      | 2     | 3     | CV         |                    |                             |
| B4E1J8  | cDNA FLJ56285, highly similar to ADP-ribosylation factor-like protein 8B       | NA             | 2.50         | 0.206359                | 0.580526  | 1.027874  | 0.478542  | 0.071784  | 0.122159  | 18.24                  | 28.72 | 2.47  | 24.83      | 0.42               | 0.16                        | 0.081159                | 0.52673  | 0.944145 | 0.239629  | 0.083163 | 0.144232 | 21.67                  | 33.86 | 2.99  | 18.41      | 0.34               | 0.14                        |
| B4E2G8  | cDNA FLJ54047, highly similar to Alpha-1 catenin (Cadherin-associated protein) | NA             | 6.17         | 0.191975                | 1.064959  | 0.274562  | 0.903666  | 0.478451  | 0.196809  | 41.21                  | 30.25 | 0.33  | 17.44      | 0.52               | 0.03                        | 0.170142                | 0.494089 | 0.656265 | 0.445809  | -0.67894 | 0.144232 | 69.99                  | 10.31 | 34.59 | 31.07      | 0.06               | 0.25                        |
| B4E3D4  | cDNA FLJ56293, highly similar to Transmembrane glycoprotein NMB                | NA             | 7.83         | 1.279459                | 1.157044  | 0.399984  | 0.454695  | 0.713899  | 0.528274  | 6.00                   | 2.68  | 9.09  | 29.95      | 0.76               | 0.09                        | 0.80397                 | 0.852934 | -0.4163  | -0.13564  | 0.166233 | 0.861222 | 2.40                   | 13.71 | 9.79  | 39.72      | 0.50               | 0.33                        |
| B5BUB5  | Autoantigen La (Fragment)                                                      | SSB            | 5.67         | 0.023818                | 0.00946   | 0.66429   | 0.691198  | -0.1544   | -0.62088  | 0.70                   | 3.12  | 22.67 | 37.65      | 0.10               | 0.77                        | -0.11965                | -0.34318 | 0.475378 | 0.631723  | 0.034327 | -1.04314 | 10.93                  | 7.66  | 5.68  | 37.74      | 0.06               | 0.87                        |
| B5MCK3  | Septin-2                                                                       | SEPT2          | 3.83         | -0.40739                | -0.21605  | 0.144642  | -0.31044  | -0.36312  | -0.00723  | 7.13                   | 22.12 | 17.36 | 3.91       | 0.14               | 0.04                        | -0.08646                | -0.21311 | -0.1025  | -0.35663  | 0.38118  | 0.094145 | 6.12                   | 12.37 | 20.94 | 27.87      | 0.18               | 0.02                        |
| B5MDF3  | GTP-binding nuclear protein Ran                                                | RAN            | 4.67         | 0.402434                | 0.42379   | 0.518147  | 0.810688  | -0.33552  | -0.117923 | 1.05                   | 14.29 | 10.94 | 29.50      | 0.28               | 0.39                        | 0.160937                | 0.330759 | -0.4055  | 0.891278  | 0.05418  | -0.13513 | 8.31                   | 21.20 | 9.27  | 25.93      | 0.29               | 0.29                        |
| B7Z2N4  | cDNA FLJ56074, highly similar to 150 kDa oxygen-regulated protein (Orp150)     | ORA1           | 8.33         | 0.306691                | 0.19729   | 0.519992  | 0.570845  | 0.476395  | 12.67     | 22.04                  | 4.63  | 17.26 | 0.25       | 0.23               | 0.383862                    | 0.077016                | 0.48322  | 0.61798  | 0.303983  | 14.98    | 23.04    | 18.28                  | 24.62 | 0.16  | 0.54       |                    |                             |
| BZ74B3  | Receptor expression-enhancing protein                                          | NA             | 2.83         | 0.312884                | 0.182525  | 0.157889  | 0.791016  | 0.615416  | 1.040827  | 4.3                    | 20.1  | 20.91 | 3.63       | 0.64               | 0.08                        | 0.73771                 | 0.268413 | -1.45706 | -1.528085 | 0.3176   | 0.830129 | 22.98                  | 11.12 | 22.71 | 39.73      | 0.86               | 0.11                        |
| B9E4V4  | Aldehyde dehydrogenase 9 family, member A1                                     | ALDH9A1        | 12.50        | 0.625528                | 0.2808    | 0.160381  | 0.181003  | 0.412555  | 0.342918  | 16.82                  | 10.1  | 3.41  | 20.29      | 0.33               | 0.06                        | 0.910042                | 0.491113 | 0.120588 | 0.413586  | 0.038328 | 0.278622 | 20.39                  | 14.31 | 3.53  | 17.62      | 0.43               | 0.01                        |
| C9R9K3  | 40S ribosomal protein S4 (Fragment)                                            | RPS4           | 4.17         | 0.896578                | 0.719818  | 0.55974   | 0.977019  | 0.250986  | 0.433714  | 8.65                   | 20.31 | 71.89 | 28.11      | 0.94               | 0.03                        | 0.610733                | 0.6856   | 0.477195 | 0.852253  | 1.813869 | 0.453039 | 3.67                   | 18.53 | 62.07 | 26.62      | 0.81               | 0.04                        |
| D3DPD2  | Adenylyl cyclase-associated protein                                            | CAP1           | 5.83         | 0.132861                | 0.014731  | -0.20043  | -0.11791  | -0.10245  | -0.636359 | 5.79                   | 4.04  | 25.88 | 14.66      | -0.15              | 0.36                        | 0.203995                | 0.010101 | -0.10522 | 0.027     | 0.256922 | 0.034587 | 9.49                   | 6.88  | 10.88 | 7.4        | 0.07               | 0.33                        |
| D3DQU2  | Tripeptidyl peptidase I, isoform CRA_a                                         | PPP1           | 7.00         | -0.43506                | -0.11968  | -0.64324  | -0.57053  | -0.13279  | -0.44705  | 15.40                  | 3.56  | 13.84 | 12.73      | -0.39              | 0.07                        | -0.25299                | -0.29914 | -1.00736 | -0.95405  | 0.352333 | 0.089747 | 2.26                   | 26.1  | 12.83 | 39.77      | 0.35               | 0.43                        |
| D9IAI1  | Epididymis secretory protein Li 34                                             | EDUS1          | 14.67        | 0.47178                 | 0.565982  | 0.542191  | 0.563766  | 0.340526  | 0.60322   | 4.62                   | 1.06  | 15.24 | 2.61       | 0.51               | 0.00                        | 0.594282                | 0.653178 | 0.839141 | 0.776935  | 0.260551 | 0.614664 | 2.89                   | 3.05  | 17.27 | 14.27      | 0.62               | 0.03                        |
| ESKRK5  | Mitochondrial NADH-ubiquinone oxidoreductase 75 kDa subunit                    | NDUFS1         | 18.00        | -0.32001                | -0.26905  | -1.13581  | -1.11648  | -0.76884  | -0.04872  | 2.50                   | 0.95  | 34.58 | 28.69      | -0.61              | 0.14                        | -0.51733                | -0.37141 | -1.05704 | -1.29431  | -0.87851 | -0.00977 | 7.15                   | 11.60 | 41.34 | 27.30      | -1.69              | 0.11                        |
| ESMHW4  | Erlin-2 (Fragment)                                                             | ERLIN2         | 5.33         | 1.765963                | 1.400538  | 1.114114  | 1.677252  | 0.98553   | 1.252835  | 17.82                  | 27.38 | 13.04 | 16.07      | 1.37               | 0.01                        | 1.503531                | 1.291599 | 0.742169 | 1.179511  | 1.770041 | 2.079551 | 10.37                  | 21.27 | 15.11 | 33.52      | 0.43               | 0.04                        |
| EWK14   | Epididymis tissue sperm binding protein L14m                                   | NA             | 27.67        | 0.479801                | 0.616155  | 0.230736  | 0.164397  | -0.030994 | 0.051095  | 6.72                   | 2.21  | 9.86  | 0.26       | 0.24               | 0.45672                     | 0.570868                | -0.22025 | -0.21104 | 0.47634   | 0.333887 | 5.59     | 0.47                   | 6.89  | 25.09 | 0.23       | 0.41               |                             |
| EWK48   | Epididymis tissue sperm binding protein L18mP                                  | NA             | 14.83        | -0.06538                | -0.52319  | -0.52582  | -0.95446  | -0.63279  | -0.44301  | 22.30                  | 11.01 | 9.29  | 15.73      | -0.51              | 0.06                        | 0.21842                 | -0.50732 | 0.68055  | 1.0485    | 0.54258  | -0.481   | 11.11                  | 17.94 | 8.02  | 17.02      | -0.58              | 0.06                        |
| EP9CR7  | 2-oxoglutarate dehydrogenase, mitochondrial                                    | OGDH           | 10.67        | -0.14344                | 0.146621  | -0.7822   | -0.53343  | -0.57917  | -0.5232   | 15.14                  | 21.61 | 27.4  | 25.61      | -0.1               | 0.04                        | -0.01232                | 0.221794 | -0.7122  | -0.75738  | 0.016448 | -0.60675 | 11.45                  | 12.21 | 30.08 | 28.55      | -0.31              | 0.02                        |
| EP9IE4  | Mitochondrial carrier homolog 2 (Fragment)                                     | MTC4           | 2.17         | 0.14056                 | 0.025402  | -0.95898  | -1.05111  | 0.248211  | 0.131608  | 5.64                   | 4.51  | 5.71  | 38.90      | -0.24              | 0.59                        | 0.178082                | -0.04067 | -0.25511 | -0.96633  | 0.029473 | -0.29615 | 10.70                  | 34.17 | 15.89 | 21.68      | -0.23              | 0.38                        |
| EP9LK3  | Puromycin-sensitive aminopeptidase                                             | NPEPPS         | 6.83         | -0.09415                | -0.10225  | 0.022617  | 0.011165  | 0.090679  | -0.42791  | 0.40                   | 0.56  | 25.15 | 5.85       | -0.08              | 0.26                        | -0.4165                 | 0.036553 | -0.20437 | -0.06477  | -0.1846  | -0.6821  | 22.02                  | 6.84  | 13.86 | 7.60       | 0.22               | 0.06                        |
| ET1OT7  | Cellular retinoic acid binding protein 1                                       | CRABP1         | 14.67        | -1.94762                | -1.89531  | -2.41442  | -2.5021   | -2.50271  | -2.71843  | 2.56                   | 4.40  | 10.55 | 26.17      | -2.33              | 0.01                        | -1.96023                | -1.8382  | -2.43671 | -2.37121  | -2.52826 | -2.7154  | 5.98                   | 3.21  | 7.96  | 26.35      | -2.31              | 0.01                        |
| F5H7R9  | Parathyromin (Fragment)                                                        | PTMS           | 1.00         | -0.8046                 | -0.51403  | -1.04824  | -0.92713  | -1.35309  | -0.51712  | 14.19                  | 5.93  | 39.86 | 12.00      | -0.86              | 0.01                        | -0.86019                | -0.59181 | -0.65602 | -0.63086  | -1.75646 | -0.70106 | 13.12                  | 1.23  | 49.54 | 17.93      | 0.27               | 0.04                        |
| F8W031  | Uncharacterized protein (Fragment)                                             | NA             | 4.67         | 0.728555                | 0.576968  | 0.745739  | 0.490037  | 0.45804   | 0.506453  | 4.72                   | 12.50 | 2.37  | 6.26       | 0.58               | 0.01                        | 0.861905                | 1.08732  | 1.574465 | 0.996463  | 0.76194  | 1.279565 | 11.03                  | 27.96 | 24.97 | 12.71      | 1.09               | 0.01                        |
| G3VZ37  | Proteasome subunit alpha type                                                  | PSMA6          | 3.00         | -0.0385                 | 0.484477  | 0.626159  | 0.126903  | -0.14711  | -0.20611  | 25.36                  | 22.51 | 2.89  | 20.08      | 0.15               | 0.48                        | -0.175798               | 0.629016 | 0.341115 | 0.034529  | -0.03829 | 22.89    | 5.24                   | 3.57  | 15.47 | 0.26       | 0.19               |                             |
| G4V299  | Anion exchange protein                                                         | NA             | 6.50         | -1.22423                | -1.19873  | -1.13348  | -1.99276  | -1.21423  | -1.21445  | 1.25                   | 40.01 | 0.99  | 11.07      | -1.33              | 0.01                        | -1.12537                | -1.14572 | -1.47208 | -1.84623  | -1.17095 | -1.06447 | 1.00                   | 18.24 | 2.13  | 20.09      | -1.29              | 0.02                        |
| G4X0L9  | Cytochrome c                                                                   | CYCS           | 9.50         | -0.06538                | -0.52319  | -0.52582  | -0.95446  | -0.63279  | -0.44301  | 22.30                  | 11.01 | 9.29  | 15.73      | -0.51              | 0.06                        | 0.21842                 | -0.50732 | 0.68055  | 1.0485    | 0.54258  | -0.481   | 11.11                  | 17.94 | 8.02  | 17.02      | -0.58              | 0.06                        |
| G4Y8T5  | Beta-synuclein                                                                 | SNCB           | 3.50         | -1.83307                | -1.16727  | 0.367891  | -1.02889  | -0.83212  | -0.48828  | 32.07                  | 63.57 | 17.06 | 41.87      | -0.83              | 0.14                        | -0.78011                | -1.05502 | 0.314774 | -0.84442  | -1.28659 | -0.79006 | 13.43                  | 9.34  | 24.70 | 34.96      | -0.74              | 0.09                        |
| HOY7A7  | Calmodulin (Fragment)                                                          | CALM2          | 5.83         | -0.41209                | -0.52164  | -0.25095  | -0.02674  | -0.92013  | -1.52462  | 5.37                   | 10.97 | 29.20 | 34.47      | -0.40              | 0.20                        | -0.44068                | -0.12924 | -0.36782 | 0.146947  | -0.81129 | -0.9426  | 15.21                  | 24.97 | 64.33 | 26.43      | -0.42              | 0.21                        |
| HOYB33  | Ribonuclease UK114 (Fragment)                                                  | HRSP12         | 2.33         | 0.195914                | 0.571485  | -0.03108  | -0.48429  | 0.404023  | -0.89508  | 18.30                  | 22.03 | 59.69 | 24.26      | -0.04              | 0.07                        | 0.271446                | -0.00596 | 0.270564 | -0.35466  | 0.80266  | -1.52161 | 13.55                  | 30.17 | 7.88  | 16.99      | 0.42               | 0.12                        |
| HOYF11  | Regulator complex protein LAMTOR1 (Fragment)                                   | LAMTOR1        | 1.00         | -0.02202                | 0.793951  | -0.24559  | -0.08147  | 0.966842  | 0.598561  | 38.96                  | 8.04  | 17.95 | 31.66      | 0.34               | 0.35                        | 0.037632                | 0.312776 | 0.096174 | 0.805515  | 0.036748 | 0.218422 | 13.44                  | 34.08 | 8.88  | 14.09      | -0.25              | 0.13                        |
| H3BN98  | Uncharacterized protein (Fragment)                                             | NA             | 5.83         | -0.8454                 | -0.99242  | -0.41265  | -0.90129  | 0.248682  | 0.365254  | 7.53                   | 23.72 | 5.71  | 47.42      | 0.46               | 0.03                        | -0.92361                | -0.83388 | -0.62777 | -0.58131  | -1.19522 | 0.152153 | 4.04                   | 2.33  | 16.94 | 31.87      | 0.50               | 0.13                        |
| H3BQZ7  | HCG2044799                                                                     | HNRNPUL2-BSC12 | 2.83         | 1.272387                | -0.13273  | 1.211865  | 1.734226  | 0.159755  | 0.03942   | 63.90                  | 25.33 | 6.16  | 48.09      | 0.71               | 0.22                        | 1.056824                | -0.08978 | 0.179827 | 1.06814   | 0.100817 | 0.578704 | 53.42                  | 42.21 | 23.21 | 11.54      | 0.48               | 0.03                        |
| H3BF58  | Coactosin-like protein                                                         | COT11          | 2.83         | 0.787791                | 0.85536   | 1.45187   | 1.325803  | 1.025838  | 0.42598   | 3.31                   | 6.17  | 29.14 | 25.53      | 0.98               | 0.04                        | 0.949382                | 1.142624 | 1.742547 | 1.193554  | 1.307088 | 0.843076 | 9.43                   | 2.50  | 22.55 | 29.73      | 1.30               | 0.03                        |
| H4V0R3  | Actin-bundle stabilizing protein                                               | NA             | 10.00        | 1.12508                 | 1.313017  | 0.771898  | 1.49574   | 1.648154  | 1.913     | 20.32                  | 12.86 | 49.22 | 26.06      | 0.64               | 0.02                        | 1.502071                | 0.841293 | 0.12469  | 0.17271   | 0.69494  | 0.47493  | 26.99                  | 22.93 | 16.46 | 40.04      | 0.63               | 0.20                        |
| IL2L26  | Thioredoxin domain-containing protein 17                                       | TXNDC17        | 1.17         | -1.13096                | -1.285436 | -0.625234 | -0.310366 | -0.08634  | 1.592341  | 64.34                  | 16.69 | 74.10 | 16.99      | 0.64               | 0.02                        | 1.028059                | 0.912096 | 0.027075 | 0.543405  | 0.273097 | 1.154655 | 6.17                   | 25.04 | 4.72  | 30.54      | -1.69              | 0.03                        |
| H4Y8T7  | Macrophage migration inhibitory factor (Fragment)                              | MYF            | 7.11         | 1.511884                | 1.464049  | 1.816903  | 1.442547  |           |           |                        |       |       |            |                    |                             |                         |          |          |           |          |          |                        |       |       |            |                    |                             |

| UniProt | Protein name                                                  | Gene name  | Peptide mean | 08/017 HESC-RPE to NRPE |          |          |          |           |          |                        |       |       |               |                    |                             | 08/023 HESC-RPE to NRPE |          |          |          |          |          |                        |       |       |               |                    |                             |
|---------|---------------------------------------------------------------|------------|--------------|-------------------------|----------|----------|----------|-----------|----------|------------------------|-------|-------|---------------|--------------------|-----------------------------|-------------------------|----------|----------|----------|----------|----------|------------------------|-------|-------|---------------|--------------------|-----------------------------|
|         |                                                               |            |              | Analysis                |          |          |          |           |          | Technical replicate CV |       |       | Biological CV | Fold change (mean) | Unadjusted p-value (t-test) | Analysis                |          |          |          |          |          | Technical replicate CV |       |       | Biological CV | Fold change (mean) | Unadjusted p-value (t-test) |
|         |                                                               |            |              | 1.1                     | 1.2      | 2.1      | 2.2      | 3.1       | 3.2      | 1                      | 2     | 3     |               |                    |                             | 1.1                     | 1.2      | 2.1      | 2.2      | 3.1      | 3.2      | 1                      | 2     | 3     |               |                    |                             |
| O6IA11  | Epididymis secretary sperm binding protein L46e               | GDI2       | 9.83         | -0.10384                | 0.027235 | 0.088663 | -0.04866 | -0.31207  | -0.68737 | 15.19                  | 6.73  | 18.29 | 19.78         | -0.14              | 0.51                        | -0.2032                 | -0.06652 | -0.34225 | 0.005541 | -0.53657 | -0.28645 | 6.69                   | 16.96 | 12.23 | 10.14         | -0.24              | 0.11                        |
| O6IAW5  | CALU protein                                                  | CALU       | 7.83         | 0.404666                | 0.642514 | 0.763022 | 0.757726 | 0.336325  | 0.276563 | 11.61                  | 6.26  | 2.93  | 15.70         | 0.03               | 0.06                        | 0.81771                 | 0.908931 | 0.957108 | 1.139292 | 0.838014 | 0.845461 | 4.47                   | 8.92  | 0.36  | 8.14          | -0.92              | 0.04                        |
| O6IB11  | PGRCM1 protein                                                | PGRCM1     | 3.83         | 1.314231                | 1.097167 | 0.444682 | 1.113767 | 0.661836  | 0.798526 | 10.62                  | 32.22 | 6.69  | 18.35         | 0.91               | 0.03                        | 0.103305                | 0.101395 | 0.308658 | 0.765401 | 0.945251 | 1.136365 | 0.94                   | 22.20 | 9.34  | 18.02         | 8.07               | 0.03                        |
| O6IB5A  | ATPS4 ATP synthase-coupling factor 6, mitochondrial           | ATPS4      | 3.33         | -0.46192                | -0.65786 | -1.04989 | -1.1     | -0.16942  | -0.0297  | 9.59                   | 2.46  | 6.84  | 33.05         | -0.18              | 0.06                        | -0.74811                | -0.248   | -1.81522 | -1.16306 | -0.77935 | -0.8329  | 24.27                  | 31.42 | 9.62  | 32.16         | -0.93              | 0.09                        |
| O6IBH0  | SLC25A11 protein                                              | SLC25A11   | 7.00         | -0.08681                | 0.240073 | -1.57493 | -1.44787 | -0.76029  | -0.30182 | 15.95                  | 6.22  | 22.28 | 50.41         | -0.66              | 0.29                        | -0.13448                | 0.115515 | -0.19762 | -1.51887 | -1.29063 | -0.23391 | 12.21                  | 20.50 | 49.62 | 43.80         | -0.69              | 0.21                        |
| O6IBH1  | HNRPK protein                                                 | HNRPK      | 10.33        | -0.37843                | -0.33839 | 0.423494 | 0.291965 | -0.75367  | -0.45239 | 1.96                   | 6.44  | 14.72 | 36.29         | 0.20               | 0.56                        | 0.033998                | 0.075362 | 0.303335 | 0.450434 | -0.71956 | -0.33459 | 2.05                   | 7.20  | 18.76 | 29.75         | -0.03              | 0.92                        |
| O6IBS5  | DST protein                                                   | DST        | 3.83         | 0.25538                 | 0.26106  | 0.99762  | 0.69733  | -0.31764  | 0.51147  | 0.08                   | 14.67 | 39.56 | 33.21         | 0.34               | 0.85                        | -0.42849                | -0.1661  | -0.5704  | -0.5704  | -0.22314 | -0.8579  | 12.81                  | 27.32 | 30.20 | 18.23         | -0.56              | 0.07                        |
| O6ICP1  | Electron factor 1-alpha                                       | EEF1A      | 17.00        | 0.454264                | 0.761194 | 0.163959 | 0.683503 | 0.951386  | 0.788998 | 17.93                  | 3.94  | 7.98  | 82.76         | 0.01               | 0.01                        | 0.654264                | 0.761194 | 1.029268 | 0.985034 | 0.684365 | 0.745568 | 5.96                   | 10.37 | 5.00  | 12.21         | 0.81               | 0.01                        |
| O6ICR1  | S-(hydroxymethyl)glutathione dehydrogenase                    | ADH5       | 5.67         | 0.391221                | 0.005495 | 0.008193 | 0.311853 | 0.489246  | 0.218593 | 18.82                  | 14.83 | 13.23 | 7.09          | 0.24               | 0.06                        | 0.773017                | 0.20945  | -0.01932 | -0.05801 | 0.399431 | 0.2727   | 10.57                  | 22.3  | 16.24 | 20.03         | -0.19              | 0.04                        |
| O6I2S2  | Annexin (Fragment)                                            | ANXA4      | 8.50         | -0.08284                | 0.203284 | -0.26107 | -0.22507 | -0.15099  | -0.57573 | 13.98                  | 1.76  | 20.67 | 15.39         | -0.18              | 0.29                        | 0.146575                | 0.725061 | -0.27426 | -0.36893 | -0.41718 | -0.21837 | 2.77                   | 4.64  | 9.73  | 33.52         | -0.07              | 0.81                        |
| O6I2T3  | HPRT1 protein (Fragment)                                      | HPRT1      | 3.00         | -1.16786                | -1.36187 | -1.10812 | -0.86627 | -1.90696  | -1.42905 | 9.49                   | 11.83 | 23.21 | 22.61         | -0.31              | 0.02                        | -0.8373                 | -0.99582 | -0.53999 | -1.4387  | -1.75437 | -0.89524 | 7.96                   | 42.68 | 40.91 | 13.20         | -1.08              | 0.01                        |
| O6I2U2  | Sodium/potassium-transporting ATPase subunit beta (Fragment)  | ATP1B1     | 6.67         | -0.00513                | 0.199982 | 0.370763 | 0.093031 | -0.16487  | -0.01377 | 10.04                  | 13.57 | 7.40  | 11.22         | 0.08               | 0.04                        | -0.13737                | 0.245409 | 0.546602 | 0.121656 | -0.12589 | -0.50602 | 18.65                  | 20.65 | 18.52 | 22.21         | 0.02               | 0.91                        |
| O6I2V0  | SLC25A5 protein (Fragment)                                    | SLC25A5    | 14.67        | -0.87542                | -0.85974 | -1.51385 | -1.78408 | -0.74779  | -0.75756 | 0.77                   | 13.21 | 0.48  | 30.05         | -1.09              | 0.06                        | -1.02877                | -1.14378 | -2.04969 | -2.15686 | -1.08891 | -1.02909 | 5.63                   | 5.25  | 2.93  | 35.53         | -1.42              | 0.05                        |
| O6I2XR8 | 40S ribosomal protein S3a                                     | RPS3A      | 4.17         | -0.03971                | -0.53039 | 0.035807 | -0.14302 | 0.38145   | 0.566854 | 23.82                  | 8.72  | 9.07  | 27.49         | 0.05               | 0.86                        | -0.00022                | 0.149334 | 0.473739 | 0.112115 | 0.301395 | 0.438661 | 7.32                   | 17.63 | 6.72  | 10.44         | 0.25               | 0.11                        |
| O6I2KH8 | ANP32A protein (Fragment)                                     | ANP32A     | 6.33         | -0.28841                | -0.36896 | 0.382604 | 1.027294 | -0.01836  | -0.04532 | 3.95                   | 31.08 | 1.22  | 40.15         | 0.12               | 0.74                        | -0.37926                | -0.04908 | 0.954237 | 1.080961 | -0.22343 | -0.1998  | 16.11                  | 6.21  | 1.16  | 53.51         | 0.20               | 0.68                        |
| O75MT9  | Malate dehydrogenase (Fragment)                               | MDH2       | 19.17        | -0.16827                | -0.56031 | -1.60767 | -1.26155 | -0.39843  | -0.40808 | 10.18                  | 2.26  | 0.47  | 37.86         | -0.88              | 0.13                        | -0.6086                 | -0.4037  | -1.50977 | -1.49591 | -0.51056 | -0.57101 | 10.03                  | 6.68  | 0.02  | 33.79         | -0.86              | 0.12                        |
| O75L19  | CTSB protein                                                  | CTSB       | 3.67         | 1.611166                | 1.724005 | 1.371686 | 1.571316 | 2.228004  | 0.028756 | 5.49                   | 6.91  | 9.75  | 27.22         | 0.26               | 0.02                        | 1.634077                | 1.810208 | 1.595385 | 1.952152 | 1.727776 | 1.732579 | 8.61                   | 12.40 | 0.28  | 2.74          | 0.04               | 0.04                        |
| O7Z4W8  | Heparin-binding protein HBP15                                 | NA         | 1.33         | -2.23022                | -1.77544 | -0.44116 | 0.784756 | -0.71668  | -1.56587 | 22.11                  | 56.71 | 40.46 | 78.62         | -0.29              | 0.06                        | 0.005089                | -1.8001  | 0.29353  | 0.464584 | 0.366677 | 0.207528 | 81.17                  | 8.57  | 7.79  | 32.05         | -0.06              | 0.89                        |
| O7Z612  | Acidic ribosomal phosphoprotein P1                            | NA         | 2.83         | -0.58054                | -0.64267 | -0.2142  | -0.30848 | -0.06293  | 0.03021  | 3.04                   | 4.62  | 4.56  | 20.27         | -0.30              | 0.23                        | -0.07096                | -0.17056 | -0.30958 | -0.70379 | -0.26606 | -0.53272 | 4.88                   | 19.20 | 13.03 | 13.72         | -0.34              | 0.10                        |
| O86U00  | Protein BLOC155-TXNDCS                                        | TXNDCS     | 4.00         | 0.714448                | 0.771218 | 0.651016 | 1.116566 | 1.323479  | 0.380859 | 9.78                   | 22.62 | 44.62 | 9.39          | 0.80               | 0.01                        | 0.729397                | 0.727459 | 0.707335 | 1.593768 | 1.62951  | 0.42319  | 0.12                   | 3.39  | 56.91 | 18.70         | 0.98               | 0.02                        |
| O86V15  | Acetyltransferase component of pyruvate dehydrogenase complex | DLAT       | 4.00         | -0.40466                | -0.8083  | -0.68909 | -0.97919 | -0.65045  | -0.75517 | 17.92                  | 14.17 | 5.13  | 7.40          | -0.72              | 0.01                        | -0.52519                | -0.5988  | -0.90857 | -1.00025 | -0.63686 | -0.80009 | 3.61                   | 4.49  | 7.99  | 13.47         | -0.74              | 0.02                        |
| O86Z22  | Epididymis secretary protein L29                              | HELS-S-297 | 2.67         | 1.379692                | 0.580399 | 2.143443 | 1.704767 | 1.675466  | 1.721421 | 38.20                  | 21.34 | 2.25  | 29.95         | 1.53               | 0.03                        | 1.887952                | 0.547836 | 1.455585 | 0.739185 | 1.504093 | 1.267363 | 61.33                  | 34.41 | 11.58 | 9.29          | 1.23               | 0.00                        |
| O8I2Z9  | Tubulin, beta 2C                                              | TUBB2C     | 54.83        | -1.6651                 | -1.64149 | -0.73776 | -0.85478 | -1.41213  | -1.67265 | 1.16                   | 5.73  | 12.73 | 34.40         | -1.33              | 0.04                        | -1.57361                | -1.81631 | -1.14664 | -0.91261 | -1.43859 | -1.77716 | 11.87                  | 11.45 | 16.52 | 26.36         | -1.44              | 0.02                        |
| O8I2T6  | Putative uncharacterized protein (Fragment)                   | NA         | 7.00         | -0.5285                 | -0.61333 | -1.39407 | -1.34116 | -1.00736  | -0.96979 | 4.16                   | 2.59  | 1.84  | 27.56         | -0.98              | 0.05                        | -0.94244                | -0.70472 | -1.4876  | -1.89984 | -0.91405 | -0.8798  | 9.32                   | 20.07 | 3.00  | 34.85         | -1.07              | 0.08                        |
| O8I2VX7 | Ribosomal protein S19 (Fragment)                              | NA         | 4.00         | 1.042478                | 0.342435 | 0.676282 | 0.578868 | 0.576208  | 0.562171 | 33.65                  | 5.80  | 1.49  | 5.71          | 0.63               | 0.00                        | 1.152781                | 0.440538 | 0.717460 | 0.43409  | 0.463731 | 0.603998 | 34.22                  | 13.85 | 6.64  | 11.62         | 0.64               | 0.02                        |
| R5S1B6  | EPHX1                                                         | EPHX1      | 1.83         | 0.26253                 | 0.39543  | -0.84176 | -0.31896 | -0.46132  | -0.51348 | 19.32                  | 28.56 | 5.7   | 19.32         | -0.39              | 0.12                        | 0.00615                 | -0.06452 | -0.87109 | -0.46284 | -0.34272 | -0.27449 | 2.96                   | 20.16 | 4.32  | 21.16         | -0.34              | 0.26                        |
| V9HW12  | Epididymis secretary sperm binding protein L2a                | PRDX2      | 18.50        | -1.33359                | -1.41605 | -1.45472 | -1.15119 | -1.26143  | -1.10006 | 4.04                   | 14.92 | 7.90  | 6.87          | -1.29              | 0.00                        | -1.6472                 | -1.57596 | -1.55739 | -1.35821 | -1.93471 | -1.80607 | 3.49                   | 9.75  | 6.30  | 14.22         | -1.65              | 0.01                        |
| V9HW21  | Epididymis luminal protein 76                                 | CA2        | 21.50        | -2.24975                | -2.1827  | -2.546   | -2.62519 | -2.57167  | -2.38963 | 3.29                   | 3.88  | 8.91  | 13.46         | -2.43              | 0.00                        | -2.30429                | -2.39006 | -2.01347 | -1.81926 | -2.49227 | -2.22036 | 4.80                   | 9.50  | 13.29 | 18.79         | -2.21              | 0.00                        |
| V9HW22  | Epididymis luminal protein 33                                 | HSPA8      | 35.50        | -1.1382                 | -1.9134  | 0.292852 | 0.243798 | 0.001188  | 0.037939 | 3.80                   | 2.40  | 1.80  | 14.81         | 0.05               | 0.75                        | -0.14317                | -0.14159 | 0.342182 | 0.431743 | -0.16732 | -0.16578 | 0.08                   | 4.38  | 0.08  | 22.86         | 0.03               | 0.90                        |
| V9HW24  | Epididymis secretary protein L73                              | HELS-S-73  | 1.83         | 1.254925                | -0.12195 | 1.818106 | -0.03779 | 0.247152  | 0.619778 | 62.79                  | 80.20 | 18.16 | 25.81         | 0.63               | 0.04                        | 1.005468                | 0.398694 | 1.560548 | 0.49104  | 1.048193 | 0.404131 | 29.31                  | 50.14 | 31.05 | 15.61         | -0.82              | 0.02                        |
| V9HW26  | ATP synthase subunit alpha                                    | ATPSA1     | 50.50        | -0.08807                | -0.26083 | -0.91583 | -1.03374 | -1.084937 | 0.054093 | 8.46                   | 5.78  | 6.10  | 35.46         | -0.40              | 0.00                        | -0.21409                | -0.19861 | -1.02579 | -1.1847  | 0.350226 | 0.184163 | 0.76                   | 7.78  | 8.13  | 43.79         | -0.35              | 0.48                        |
| V9HW27  | Crystallin, alpha B, isoform CRA_a                            | CRYAB      | 7.50         | 0.659075                | 0.395929 | 0.143683 | 0.24313  | 1.218964  | 0.094734 | 12.86                  | 8.87  | 6.57  | 34.71         | 0.62               | 0.16                        | 0.885226                | 0.716504 | 0.451519 | 0.689039 | 1.140096 | 1.155232 | 8.26                   | 11.62 | 0.74  | 20.26         | 0.84               | 0.04                        |
| V9HW31  | ATP synthase subunit beta                                     | ATPSB      | 65.17        | -0.92464                | -0.93214 | -1.75197 | -1.90832 | -1.07407  | -0.93739 | 0.37                   | 7.65  | 5.72  | 30.60         | -1.26              | 0.05                        | -0.94244                | -0.83034 | -1.2933  | -2.05898 | -0.71922 | -0.6955  | 5.49                   | 6.17  | 1.16  | 40.90         | -1.20              | 0.10                        |
| V9HW32  | Epididymis secretary protein L55                              | HELS-S-55  | 11.00        | 0.084404                | 0.3136   | -0.46167 | -0.29837 | -0.0023   | 0.046312 | 7.31                   | 10.24 | 3.85  | 20.19         | -0.06              | 0.06                        | 0.147843                | 0.387114 | -0.29123 | -0.2497  | 0.645791 | 0.001391 | 16.55                  | 2.49  | 4.28  | 18.45         | -0.03              | 0.55                        |
| V9HW43  | Epididymis luminal protein L102                               | HSPB1      | 8.00         | 0.834902                | 0.992387 | 0.604448 | 0.408549 | 0.640775  | 0.555071 | 11.77                  | 9.58  | 5.18  | 15.06         | 0.64               | 0.00                        | 0.624728                | 0.778966 | 0.560204 | 0.493883 | 0.372337 | 0.314695 | 5.55                   | 8.75  | 2.87  | 12.70         | 0.56               | 0.04                        |
| V9HW53  | Dimethylarginine dimethylaminohydrolase 2, isoform CRA_a      | DDAH2      | 3.50         | -0.13183                | -0.13148 | 0.341567 | -0.78    | -0.16393  | -0.05811 | 0.02                   | 52.36 | 5.18  | 0.81          | -0.15              | 0.04                        | 0.309782                | -0.26749 | 0.417197 | 0.239202 | 0.059746 | -0.45289 | 27.92                  | 7.86  | 24.86 | 17.66         | 0.05               | 0.04                        |
| V9HW55  | Epididymis secretary protein L275                             | HELS-S-275 | 2.17         | 0.624507                | 0.398523 | 1.005291 | 0.76519  | 0.110366  | 0.32667  | 11.05                  | 11.74 | 10.58 | 23.35         | 0.54               | 0.11                        | 0.503531                | 0.569825 | 1.01548  | 0.932453 | 0.252763 | 0.555293 | 3.25                   | 4.07  | 14.77 | 21.30         | 0.64               | 0.07                        |
| V9HW56  | Epididymis secretary protein L108                             | TPM4       | 8.50         | 0.68854                 | 1.303358 | 0.385245 | 1.639843 | 0.598528  | 0.49687  | 25.90                  | 57.89 | 4.98  | 20.88         | 0.87               | 0.03                        | 0.465157                | 1.272935 | 1.078668 | 2.211355 | 1.583032 | 0.875413 | 38.59                  | 52.83 | 34.00 | 29.17         | 1.25               | 0.03                        |
| V9HW71  | Endoplasmic reticulum resident protein 29                     | ERP29      | 6.50         | 2.68826                 | 2.181228 | -0.0219  | -0.0618  | 0.212946  | 0.818778 | 24.60                  | 1.96  | 29.26 | 93.89         | 0.97               | 0.33                        | 2.610087                | 2.198027 | 1.52585  | -0.03836 | 0.305249 | 0.139381 | 20.06                  | 9.35  | 8.    |               |                    |                             |



| UniProt     | Protein name                                                                 | Gene name | Peptide mean | 08/017 HESC-RPE to hRPE |          |          |          |          |          | Biological CV | Fold change (mean) | Unadjusted p-value (t-test) | 08/023 HESC-RPE to hRPE |       |          |          |           |          | Biological CV | Fold change (mean) | Unadjusted p-value (t-test) |                        |       |       |       |       |      |
|-------------|------------------------------------------------------------------------------|-----------|--------------|-------------------------|----------|----------|----------|----------|----------|---------------|--------------------|-----------------------------|-------------------------|-------|----------|----------|-----------|----------|---------------|--------------------|-----------------------------|------------------------|-------|-------|-------|-------|------|
|             |                                                                              |           |              | Analysis                |          |          |          |          |          |               |                    |                             | Technical replicate CV  |       |          | Analysis |           |          |               |                    |                             | Technical replicate CV |       |       |       |       |      |
|             |                                                                              |           |              | 1.1                     | 1.2      | 2.1      | 2.2      | 3.1      | 3.2      |               |                    |                             | 1                       | 2     | 3        | 1.1      | 1.2       | 2.1      |               |                    |                             | 2.2                    | 3.1   | 3.2   | 1     | 2     | 3    |
| P20674      | Cytochrome oxidase subunit 5A, mitochondrial                                 | COX5A     | 5.50         | 0.534416                | -0.39194 | -1.09221 | -1.71408 | -1.32795 | -1.2426  | 43.91         | 30.02              | 4.18                        | 64.35                   | -0.87 | 0.21     | 0.91806  | -0.21744  | -0.53669 | -1.84896      | -1.3977            | -0.89047                    | 52.95                  | 60.22 | 24.61 | 67.52 | -0.66 | 0.32 |
| P20700      | Lamin-B1                                                                     | LMNB1     | 10.67        | -0.35836                | -0.17389 | 0.392936 | 0.358453 | -0.75509 | 0.954853 | 9.03          | 16.49              | 75.20                       | 22.90                   | 0.07  | 0.74     | -0.46588 | -0.07068  | -0.23145 | 0.106735      | -0.98376           | -0.19245                    | 19.25                  | 16.50 | 37.84 | 16.50 | -0.46 | 0.38 |
| P21333      | Filamin-A                                                                    | FLNA      | 38.83        | 1.279703                | 1.27822  | 1.027436 | 0.960179 | 0.79485  | 1.030971 | 0.07          | 3.30               | 11.55                       | 13.57                   | 1.06  | 0.01     | 1.270175 | 1.293218  | 1.450871 | 1.393843      | 1.132476           | 1.327719                    | 1.13                   | 2.79  | 9.55  | 6.91  | 1.31  | 0.00 |
| P21964      | Catechol O-methyltransferase                                                 | COMT      | 4.17         | -0.00296                | -0.03516 | 0.291553 | 0.388972 | 0.124156 | -0.58928 | 1.58          | 4.77               | 34.27                       | 19.24                   | 0.03  | 0.88     | 0.54076  | 0.341408  | 0.393751 | 0.321676      | -0.43663           | -0.6281                     | 9.76                   | 3.53  | 3.97  | 62.92 | 0.90  | 0.80 |
| P22695      | Cytochrome b-c1 complex subunit 2, mitochondrial                             | UOCCR2    | 13.50        | -0.167695               | -0.43929 | -0.79318 | -0.9709  | -0.62414 | -0.82556 | 12.82         | 8.70               | 9.86                        | 21.39                   | 0.62  | 0.07     | -0.72077 | -0.62984  | -0.86321 | -0.84759      | -1.39607           | -0.45201                    | 4.46                   | 0.77  | 44.69 | 7.23  | -0.82 | 0.01 |
| P35398      | Z65 proteorhizolium subunit 7                                                | PSMC2     | 2.67         | 0.382338                | -0.523   | 1.035475 | 2.071931 | 0.280219 | 0.490949 | 42.97         | 48.72              | 10.31                       | 63.42                   | 0.64  | 0.33     | -0.23431 | 0.40463   | 1.251668 | 1.070065      | -0.00165           | 1.094883                    | 14.43                  | 9.06  | 51.30 | 41.20 | 0.54  | 0.28 |
| P36375      | α-tubulin-β                                                                  | TUBB1     | 8.33         | -0.7526                 | -0.91577 | -0.66535 | -0.21477 | -1.23626 | 7.73     | 8.52          | 24.35              | 30.69                       | -0.80                   | 0.18  | -0.81477 | -0.89608 | -0.71173  | -0.25252 | -0.85133      | -1.073             | 3.98                        | 28.48                  | 11.67 | 16.24 | 0.72  | 0.02  |      |
| P39564      | Dolichyl-diphosphooligosaccharide-protein glycosyltransferase 48 kDa subunit | NRFC      | 4.50         | 0.488433                | 0.11787  | 0.04523  | 0.22497  | 0.623948 | 0.812274 | 18.12         | 13.17              | 9.22                        | 22.52                   | 0.37  | 0.16     | 0.239136 | 0.129227  | -0.03406 | -0.1173       | 0.604947           | 0.78821                     | 5.38                   | 4.10  | 1.71  | 27.80 | -0.27 | 0.46 |
| P46459      | Vesicle-fusing ATPase                                                        | NSF       | 4.00         | -0.41827                | -0.305   | -0.08854 | 0.159685 | -0.48362 | -1.0913  | 18.63         | 12.14              | 29.35                       | 26.61                   | -0.32 | 0.31     | -0.18615 | -0.2177   | 0.369471 | 0.074984      | -0.38091           | -1.18586                    | 15.56                  | 14.38 | 38.46 | 32.27 | 0.25  | 0.37 |
| P49419      | Alpha-aminoacidic semialdehyde dehydrogenase                                 | ALDH7A1   | 6.33         | 0.809743                | 0.542454 | 0.585228 | 0.285924 | 0.726373 | -0.77172 | 13.06         | 14.62              | 67.47                       | 17.80                   | 0.36  | 0.22     | 0.542566 | 0.18078   | 0.363739 | 0.311951      | 0.763271           | -0.54797                    | 17.64                  | 2.54  | 60.20 | 4.28  | 0.27  | 0.08 |
| P49773      | Histidine triad nucleotide-binding protein 1                                 | HINT1     | 2.33         | 0.513608                | 0.63496  | 0.498019 | 0.510908 | 0.609656 | 0.901908 | 5.94          | 0.63               | 14.28                       | 9.42                    | 0.61  | 0.01     | 0.563465 | 0.715162  | 0.550561 | 0.915295      | 0.397929           | 0.814022                    | 7.38                   | 17.78 | 20.25 | 6.4   | 0.66  | 0.00 |
| P52272      | Heterogeneous nuclear ribonucleoprotein M                                    | HNRNPM    | 6.50         | 0.536453                | -0.14066 | 1.122413 | 0.732243 | 0.25467  | -0.50267 | 32.59         | 19.01              | 12.13                       | 26.99                   | 0.50  | 0.15     | 0.62629  | -0.01462  | 0.830202 | 0.316822      | 0.075923           | -0.14622                    | 30.91                  | 24.90 | 10.87 | 21.20 | 0.28  | 0.25 |
| P54819      | Adenylyl kinase 2, mitochondrial                                             | AK2       | 7.67         | 0.637852                | -0.09129 | -0.6231  | -0.35425 | 0.122102 | -0.2044  | 35.00         | 13.14              | 16.73                       | 27.12                   | 0.99  | 0.73     | 0.374258 | 0.125494  | -0.71794 | -0.36763      | 0.514987           | 0.879724                    | 12.16                  | 17.09 | 10.78 | 40.22 | 0.13  | 0.75 |
| P60174      | Triose-phosphate isomerase                                                   | TPPI      | 26.67        | -0.14984                | -0.15053 | 0.126547 | 0.117781 | -0.03016 | 0.322607 | 0.03          | 0.43               | 17.20                       | 11.26                   | 0.04  | 0.72     | -0.06681 | -0.17827  | 0.056067 | 0.161235      | -0.48126           | -0.35949                    | 4.30                   | 5.15  | 6.19  | 18.78 | -0.18 | 0.37 |
| P63208      | S-phase kinase-associated protein 1                                          | SKP1      | 4.83         | -0.14831                | -0.21714 | 0.984276 | 0.980363 | -0.19016 | -0.07711 | 3.16          | 0.19               | 5.80                        | 49.48                   | 0.22  | 0.62     | -0.28603 | -0.2835   | 0.094686 | 1.191935      | -0.33376           | 0.613397                    | 17.57                  | 12.49 | 35.73 | 46.67 | 0.33  | 0.46 |
| C06830      | Peroxylidoxin-1                                                              | PRDX1     | 17.50        | 0.03262                 | 0.066588 | 0.110187 | 0.35907  | 0.106996 | 0.038215 | 1.57          | 12.17              | 3.37                        | 7.31                    | 0.12  | 0.18     | 0.179438 | 0.234586  | 0.125468 | 0.141009      | -0.30487           | -0.3915                     | 2.70                   | 0.76  | 4.20  | 19.58 | 0.00  | 0.99 |
| C08722      | Leukocyte surface antigen CD47                                               | CD47      | 2.33         | -1.16168                | -1.18702 | -1.02097 | -1.11534 | -1.15083 | -1.21412 | 1.28          | 4.14               | 31.10                       | 11.11                   | 0.00  | 0.00     | -1.17943 | -0.60683  | -0.40554 | -1.187        | -0.85363           | -0.9525                     | 7.00                   | 37.99 | 4.00  | 5.58  | 0.86  | 0.00 |
| Q13813      | SPTAN1                                                                       | SPTAN1    | 53.83        | -0.03491                | -0.4504  | -0.34477 | -0.34217 | -0.58168 | -0.44743 | 6.05          | 0.13               | 6.57                        | 6.02                    | -0.42 | 0.01     | -0.40921 | -0.41335  | -0.40514 | -0.27984      | -0.64395           | -0.41843                    | 0.20                   | 3.20  | 11.03 | 7.42  | -0.42 | 0.01 |
| Q15435      | Protein phosphatase 1 regulatory subunit 7                                   | PPP1R7    | 1.83         | -0.15006                | -1.30823 | -0.49505 | -1.34585 | -0.76218 | -0.81757 | 53.90         | 40.53              | 2.71                        | 8.80                    | -0.81 | 0.00     | 0.223832 | -0.95424  | -0.89063 | -0.03732      | -0.2522            | 0.012046                    | 54.73                  | 40.64 | 12.92 | 9.93  | -0.32 | 0.09 |
| Q15835      | Rhodopsin kinase                                                             | GRK1      | 6.17         | -0.7526                 | -0.71904 | -1.15339 | -0.83255 | 1.000629 | -0.61048 | 1.64          | 15.66              | 71.67                       | 55.45                   | -0.59 | 0.29     | -1.13593 | -0.82487  | -0.90762 | -1.18815      | -0.82881           | -0.56181                    | 15.19                  | 13.71 | 10.35 | 13.30 | -0.91 | 0.01 |
| Q16891      | MIC                                                                          | IMMT      | 13.83        | -0.26174                | -0.10817 | -0.70412 | -0.48798 | 0.325545 | 0.606287 | 7.52          | 10.57              | 13.72                       | 38.03                   | -0.11 | 0.77     | -0.03302 | -0.22155  | -0.49543 | -0.3313       | 0.524075           | 0.709101                    | 9.23                   | 8.04  | 9.06  | 37.69 | 0.63  | 0.94 |
| Q555J5      | HP1BP3                                                                       | HP1BP3    | 4.83         | -1.51297                | -1.2538  | -2.13756 | -2.00753 | -1.14556 | -1.33656 | 12.67         | 6.37               | 3.75                        | 28.10                   | 0.10  | 0.03     | -1.48079 | -1.02198  | -1.40353 | -1.4881       | -1.705             | -1.35025                    | 22.30                  | 4.14  | 17.30 | 10.43 | -1.41 | 0.00 |
| Q9Y9B4      | Sideroflexin-1                                                               | SFXN1     | 3.67         | 0.12476                 | -1.75993 | -0.00717 | 0.032458 | -0.03516 | 0.028963 | 81.15         | 1.94               | 3.14                        | 19.94                   | -0.27 | 0.43     | -0.07096 | -1.82643  | -0.59054 | 0.461838      | 0.004336           | 0.82482                     | 7.76                   | 79.41 | 39.16 | 38.21 | -0.20 | 0.67 |
| C9YU87      | Glyoxylate reductase/hydroxypyruvate reductase                               | GRHRP     | 3.50         | -0.14875                | 1.821495 | 0.447212 | 0.313763 | 0.582935 | 0.657451 | 83.91         | 6.54               | 3.65                        | 28.19                   | 0.61  | 0.04     | -0.63626 | 1.322501  | 0.554123 | 0.390285      | 0.434957           | 0.786731                    | 83.55                  | 7.42  | 17.16 | 67.43 | -0.47 | 0.03 |
| Q93453      | Succinate dehydrogenase [ubiquinone] flavoprotein subunit, mitochondrial     | SDHA      | 2.17         | 0.880202                | 1.044762 | -0.13872 | -0.18976 | 0.981783 | 0.488534 | 8.04          | 2.50               | 23.94                       | 34.50                   | 0.51  | 0.28     | 0.062815 | 1.034511  | -0.15057 | 0.537853      | 1.524434           | 1.489413                    | 45.90                  | 32.12 | 1.72  | 47.16 | 0.75  | 0.20 |
| AA0424Q20   | N-ethylmaleimide-sensitive factor attachment protein, alpha, isoform CRA_c   | NDA       | 5.17         | -0.41209                | 0.610675 | -0.40737 | 0.174944 | 0.485857 | -0.46099 | 48.13         | 28.16              | 44.81                       | 9.52                    | 0.00  | 0.98     | -0.30944 | -0.234774 | -0.77137 | -0.35886      | -0.86037           | -1.37229                    | 26.36                  | 20.08 | 35.17 | 20.66 | -0.37 | 0.16 |
| AA0424R0Y5  | ATP-dependent 4-phosphofructokinase                                          | PFKM      | 8.83         | 1.104488                | -0.53396 | -0.64035 | 0.83217  | -0.48109 | -0.32624 | 72.66         | 66.50              | 5.78                        | 30.03                   | -0.01 | 0.97     | 0.178631 | -0.39093  | -0.8059  | 0.792462      | -0.6796            | -0.37364                    | 66.39                  | 7.12  | 14.94 | 34.02 | -0.06 | 0.83 |
| AA0424R3C5  | Apolipoprotein A-I, isoform CRA_a                                            | APOA1     | 2.33         | 2.634717                | 2.317136 | 1.79476  | 2.021072 | 0.964121 | 0.421314 | 15.50         | 11.07              | 26.30                       | 53.91                   | 1.69  | 0.08     | 2.217174 | 2.231446  | 1.251878 | 1.297959      | 2.338172           | 1.71849                     | 2.92                   | 2.26  | 30.20 | 19.59 | 1.83  | 0.02 |
| AA0424R407  | Microtubule-associated protein 2                                             | MAP2      | 5.00         | -0.06791                | -0.55947 | 0.639152 | 0.50609  | -0.70364 | -0.26858 | 24.67         | 6.52               | 21.16                       | 52.68                   | 0.62  | 0.62     | -0.96694 | -0.46899  | 1.229713 | 0.158072      | -0.87244           | -0.23641                    | 25.59                  | 50.24 | 30.68 | 61.45 | -0.20 | 0.70 |
| AA0424R6Y2  | Nuclear transport factor 2, isoform CRA_a                                    | NTF2      | 2.00         | 0.782079                | 0.676447 | 0.416561 | 0.635097 | 0.728146 | 1.284069 | 5.17          | 10.69              | 26.92                       | 17.77                   | 0.75  | 0.00     | 0.732708 | 0.602702  | 0.619222 | 0.652581      | 0.786198           | 0.999358                    | 6.37                   | 1.63  | 10.43 | 10.08 | 0.73  | 0.01 |
| AA0424R713  | Dihydropyridyl dehydrogenase                                                 | RBD       | 10.67        | -0.49566                | -0.34537 | -1.13931 | -1.07091 | 0.228302 | 0.216161 | 7.36          | 3.35               | 0.60                        | 44.49                   | -0.43 | 0.37     | -0.41387 | -0.34626  | -1.44151 | -0.90267      | -0.04729           | -0.19539                    | 3.31                   | 26.11 | 7.25  | 33.54 | -0.56 | 0.22 |
| AA0424R845  | RAB14, member RAS oncogene family, isoform CRA_a                             | RAB14     | 5.67         | -0.40738                | -0.94854 | -0.04223 | 0.274788 | -0.1014  | -0.2421  | 26.22         | 12.56              | 6.89                        | 25.01                   | -0.25 | 0.37     | -1.03911 | -0.68651  | -0.20848 | 0.078574      | -0.15737           | -0.71399                    | 16.78                  | 10.23 | 26.95 | 28.10 | -0.44 | 0.21 |
| AA0424R924  | Beta-ketoylate-binding protein                                               | KPCT      | 4.17         | -0.27797                | 0.73556  | 0.73547  | 1.26557  | 0.046627 | 0.57749  | 4.71          | 23.12              | 22.18                       | 14.09                   | 0.82  | 0.02     | 0.782475 | 0.412004  | 0.88919  | 1.09196       | 0.66626            | 0.019884                    | 19.06                  | 20.00 | 29.21 | 22.78 | 0.64  | 0.08 |
| AA0424R9U3  | OCL1 domain containing 1, isoform CRA_a                                      | OCLAD1    | 2.00         | 0.016247                | 0.196176 | 0.210492 | -0.02298 | 0.914703 | 1.340186 | 8.81          | 11.42              | 20.70                       | 45.07                   | 0.44  | 0.33     | 0.513038 | 0.920493  | 0.03198  | 0.07375       | 0.66628            | 0.991518                    | 20.30                  | 10.4  | 15.86 | 30.20 | 0.50  | 0.21 |
| AA0424R9A6  | Beta-hexosaminidase                                                          | HEXB      | 3.17         | 0.844252                | 0.88852  | 0.339474 | 0.209326 | -0.24643 | -0.49092 | 1.19          | 6.37               | 7.96                        | 39.99                   | 0.27  | 0.52     | -0.22891 | 0.45057   | 0.071582 | 0.538027      | 0.122443           | -0.16266                    | 32.70                  | 22.66 | 19.93 | 11.67 | 0.13  | 0.01 |
| AA0424R818  | Retinol dehydrogenase 5 (11-cis and 9-cis), isoform CRA_a                    | RDH5      | 10.67        | -1.29058                | -1.17797 | -1.12017 | -1.16887 | -1.12927 | -1.23327 | 5.52          | 2.39               | 5.10                        | 30.39                   | -1.19 | 0.00     | -1.30267 | -1.04681  | -1.53375 | -1.03603      | -0.97601           | -1.2732                     | 12.51                  | 24.16 | 14.51 | 5.11  | -1.19 | 0.00 |
| AA0424R875  | Citrate synthase                                                             | CS        | 14.00        | -0.54852                | -0.86872 | -1.73599 | -1.76872 | -0.66944 | -1.21839 | 15.63         | 16.00              | 26.59                       | 34.11                   | -0.17 | 0.07     | -0.57003 | -0.90101  | -1.75344 | -1.73873      | -0.8846            | -1.21141                    | 16.15                  | 0.72  | 15.95 | 33.38 | -1.19 | 0.00 |
| AA0424R7WV4 | Neural cell adhesion molecule 1                                              | NCAM1     | 9.33         | -1.64157                | -1.37608 | -1.16463 | -1.99172 | -1.59852 | -1.40415 | 12.98         | 39.46              | 9.51                        | 47.79                   | -1.53 | 0.00     | -1.60994 | -1.32237  | -1.1156  | -1.61918      | -1.89111           | -1.69584                    | 14.05                  | 24.43 | 9.56  | 15.42 | -1.34 | 0.01 |
| AA040A0MSE2 | Hydroxacyl-coenzyme A dehydrogenase, mitochondrial                           | HADH      | 3.50         | 1.307645                | 1.007668 | 0.218487 | 0.026    | -0.1014  | 0.581095 | 14.65         | 9.42               | 32.84                       | 81.73                   | 0.73  | 0.26     | 1.140111 |           |          |               |                    |                             |                        |       |       |       |       |      |

| UniProt    | Protein name                                                                                            | Gene name | Peptide mean | 08/107 HESC-RPE to hRPE |          |          |          |          |       |                        |       |       |               |                    |                             | 08/023 HESC-RPE to hRPE |          |          |          |       |       |                        |       |       |               |                    |                             |
|------------|---------------------------------------------------------------------------------------------------------|-----------|--------------|-------------------------|----------|----------|----------|----------|-------|------------------------|-------|-------|---------------|--------------------|-----------------------------|-------------------------|----------|----------|----------|-------|-------|------------------------|-------|-------|---------------|--------------------|-----------------------------|
|            |                                                                                                         |           |              | Analysis                |          |          |          |          |       | Technical replicate CV |       |       | Biological CV | Fold change (mean) | Unadjusted p-value (t-test) | Analysis                |          |          |          |       |       | Technical replicate CV |       |       | Biological CV | Fold change (mean) | Unadjusted p-value (t-test) |
|            |                                                                                                         |           |              | 1.1                     | 1.2      | 2.1      | 2.2      | 3.1      | 3.2   | 1                      | 2     | 3     |               |                    |                             | 1.1                     | 1.2      | 2.1      | 2.2      | 3.1   | 3.2   | 1                      | 2     | 3     |               |                    |                             |
| O8NTCS     | HSPA9 protein (Fragment)                                                                                | HSPA9     | 21.80        | 0.908373                | 0.422091 | -0.55688 | -0.361   | 0.061238 | 23.61 | 9.59                   | NA    | 39.53 | 0.09          | 0.81               | 0.78591                     | 0.258178                | -0.79884 | -0.67449 | 0.295341 | 25.58 | 6.09  | NA                     | 40.55 | -0.03 | 0.95          |                    |                             |
| O9B1T5     | Similar to NADH dehydrogenase (Ubiquinone) 1 alpha subcomplex, 9 (39kD) (Fragment)                      | NA        | 5.80         | -0.68648                | -0.12112 | -0.12913 | -0.19944 | -0.41735 | 27.36 | 5.86                   | NA    | 27.47 | -0.20         | 0.72               | -0.45053                    | -0.35713                | -1.63151 | -0.88299 | -2.74464 | 37.58 | 35.99 | NA                     | 82.00 | -0.11 | 0.21          |                    |                             |
| Y9HW58     | Epididymis secretory protein Li 77                                                                      | DCTN2     | 4.20         | 0.239584                | 0.346322 | 0.111169 | -0.64484 | -0.46691 | 5.23  | 36.23                  | NA    | 7.75  | -0.08         | 0.58               | -0.18515                    | -0.26882                | -0.22729 | -0.14481 | -0.40645 | 4.10  | 4.04  | NA                     | 7.98  | -0.25 | 0.06          |                    |                             |
| O8NSK1     | CDGSH iron-sulfur domain-containing protein 2                                                           | CISD2     | 1.40         | -0.39232                | -0.24372 | -0.72588 | -0.34685 | -0.39053 | 7.59  | 18.47                  | NA    | 27.30 | -0.07         | 0.60               | -0.45563                    | 0.0                     | -0.60933 | -0.72574 | -0.6433  | 22.15 | 5.00  | NA                     | 18.63 | -0.49 | 0.07          |                    |                             |
| O9NOC3     | Reticulon-4                                                                                             | RTN4      | 6.00         | 0.528151                | -0.91988 | -0.77583 | -0.96471 | -1.27152 | 65.56 | 9.24                   | NA    | 46.00 | -0.68         | 0.13               | -0.325                      | -0.89444                | -0.46507 | -0.67691 | -1.05457 | 27.55 | 30.36 | NA                     | 18.06 | -0.68 | 0.04          |                    |                             |
| O9P0J0     | NADH dehydrogenase [ubiquinone] 1 alpha subcomplex subunit 13                                           | NDFU13    | 2.80         | 0.024785                | -0.84978 | -0.87783 | -0.26472 | -0.70159 | 41.60 | 17.23                  | NA    | 23.96 | -0.73         | 0.16               | 0.536324                    | -0.66226                | -0.88081 | -1.60837 | -1.17921 | 56.75 | 74.32 | NA                     | 15.06 | -0.75 | 0.17          |                    |                             |
| AA024R02   | Complement factor 1                                                                                     | CF1       | 1.00         | 1.771221                | 1.565804 | 0.974898 | 0.405785 | 2.067198 | 70.09 | 16.15                  | NA    | 27.63 | 1.58          | 0.27               | 1.630888                    | 1.188535                | 1.596808 | 1.442842 | 2.369161 | 31.16 | 7.54  | NA                     | 35.86 | 1.69  | 0.02          |                    |                             |
| AA04Z1     | CADM1 protein                                                                                           | CADM1     | 3.80         | 0.105545                | -0.71094 | 0.536537 | -0.54684 | -0.98477 | 8.41  | 50.74                  | NA    | 29.49 | 0.45          | 0.20               | 0.455322                    | -0.52085                | -0.21573 | -0.50771 | -0.55107 | 1.44  | 73.06 | NA                     | 20.84 | -0.86 | 0.09          |                    |                             |
| B3KSH1     | Eukaryotic translation initiation factor 3 subunit F                                                    | EIF3F     | 1.20         | -0.56852                | -0.1438  | 0.477986 | -1.18436 | -2.14278 | 20.67 | 73.52                  | NA    | 57.01 | -0.21         | 0.25               | -0.44814                    | -0.00995                | -0.54848 | -0.30051 | -0.83618 | 21.31 | 12.12 | NA                     | 21.13 | -0.43 | 0.20          |                    |                             |
| D6R1E3     | Cytochrome c oxidase subunit 7A2, mitochondrial                                                         | COX7A2    | 2.60         | -0.62569                | -0.7987  | -1.89252 | -1.52544 | -1.11103 | 8.47  | 17.90                  | NA    | 50.19 | -0.99         | 0.21               | -0.83652                    | -0.98487                | -1.70221 | -1.50519 | -0.91313 | 7.27  | 9.64  | NA                     | 25.11 | -1.19 | 0.04          |                    |                             |
| HOYDL9     | Transferrin (Fragment)                                                                                  | CDB1      | 1.00         | -0.21392                | -0.06782 | 0.233219 | 0.121664 | 0.2488   | 7.15  | 5.46                   | NA    | 13.77 | 0.06          | 0.51               | -1.03684                    | -0.12179                | -0.96673 | -0.57303 | 0.565324 | 43.40 | 19.18 | NA                     | 52.29 | -0.43 | 0.59          |                    |                             |
| O15537     | Retinoschisin                                                                                           | RS1       | 3.80         | -0.74697                | -0.54167 | -1.40597 | -1.05166 | -0.52117 | 10.05 | 17.28                  | NA    | 23.90 | -0.85         | 0.07               | -0.3272                     | -1.25718                | -0.19362 | -1.32243 | -0.78895 | 44.07 | 52.67 | NA                     | 4.80  | -0.78 | 0.00          |                    |                             |
| O60262     | Guanine nucleotide-binding protein G(I)/G(S)/G(O) subunit gamma-7                                       | GNG7      | 1.00         | 0.332871                | -0.41782 | -0.94513 | -0.85812 | -0.36203 | 35.99 | 4.26                   | NA    | 30.34 | -0.45         | 0.22               | 0.251337                    | -0.10184                | -1.96327 | -1.44624 | -1.19612 | 58.20 | 25.07 | NA                     | 52.40 | -1.07 | 0.11          |                    |                             |
| O75475     | PC4 and SFRS1-interacting protein                                                                       | PSP1      | 2.80         | -1.58496                | -1.40696 | -1.37401 | -1.01817 | -1.79551 | 8.71  | 17.35                  | NA    | 26.63 | -1.22         | 0.04               | -0.26912                    | -1.28216                | -0.7406  | -0.94285 | -0.81207 | 37.64 | 9.90  | NA                     | 35.08 | -1.17 | 0.06          |                    |                             |
| P15531     | Nucleoside diphosphate kinase A                                                                         | NME1      | 7.00         | -0.33409                | -1.45872 | -0.21266 | -0.67651 | -0.9357  | 52.49 | 22.54                  | NA    | 45.73 | -0.92         | 0.13               | -0.22916                    | -1.713                  | -0.051   | -0.08337 | -0.9675  | 66.93 | 14.59 | NA                     | 28.52 | -0.61 | 0.16          |                    |                             |
| P161515    | Sarcoplasmic/endoplasmic reticulum calcium ATPase 2                                                     | ATP2A2    | 6.40         | 0.197116                | 0.483492 | 0.173602 | 0.011165 | -0.20866 | 14.03 | 7.95                   | NA    | 18.99 | 0.13          | 0.68               | 0.45975                     | 0.52241                 | 0.725932 | -0.15306 | -0.00784 | 3.31  | 21.17 | NA                     | 21.17 | 0.19  | 0.45          |                    |                             |
| P62136     | Serine/threonine-protein phosphatase PP1-alpha catalytic subunit                                        | PPP1CA    | 3.20         | 0.905717                | 0.014731 | 0.765907 | 0.362765 | 0.795598 | 8.41  | 19.44                  | NA    | 23.27 | 0.43          | 0.14               | 0.450781                    | 0.347104                | 0.627074 | 0.936808 | 0.67497  | 15.91 | 9.17  | NA                     | 15.91 | 0.21  | 0.36          |                    |                             |
| O5TZA2     | RhoGDIin                                                                                                | RHOCC     | 10.80        | 0.062437                | 0.549085 | -0.47097 | -1.16827 | 1.841    | 33.53 | NA                     | 43.24 | -0.24 | 0.54          | -0.00637           | 0.347483                    | -0.33585                | -1.1202  | 0.202141 | 17.26    | 37.52 | NA    | 30.72                  | -1.18 | 0.74  |               |                    |                             |
| OZ7H55     | Transmembrane emp24 domain-containing protein 4                                                         | TMED4     | 2.20         | 0.487591                | 0.438293 | 0.032498 | 0.01769  | 0.235257 | 2.42  | 0.73                   | NA    | 15.19 | 0.24          | 0.20               | 0.586423                    | -0.07021                | 0.975499 | 0.000252 | 0.560673 | 31.64 | 46.06 | NA                     | 10.44 | -0.41 | 0.04          |                    |                             |
| O9H2U2     | Inorganic pyrophosphatase 2, mitochondrial                                                              | PPA2      | 5.40         | -0.1151                 | -0.04806 | 0.103638 | 0.205216 | -0.06017 | 3.29  | 6.95                   | NA    | 32.10 | 0.20          | 0.56               | 0.622452                    | -0.18026                | -0.50977 | -0.20506 | 0.164431 | 38.36 | 15.10 | NA                     | 21.53 | -0.02 | 0.96          |                    |                             |
| O9UHO9     | NADH-cytochrome b5 reductase 1                                                                          | CYBSR1    | 4.20         | -0.27454                | -0.62881 | -0.49805 | -0.197   | -0.75875 | 17.28 | 14.70                  | NA    | 14.60 | -0.47         | 0.05               | -0.1019                     | -0.3697                 | 0.004548 | 0.061264 | -1.10074 | 13.09 | 2.78  | NA                     | 62.55 | -0.30 | 0.33          |                    |                             |
| AA024R1U4  | RAB5C, member RAS oncogene family, isoform CRA_a                                                        | RAB5C     | 4.20         | -0.92726                | -1.56817 | -0.20409 | -0.69859 | 1.101363 | 30.91 | 24.00                  | NA    | 82.54 | -0.46         | 0.00               | -2.51357                    | -1.57727                | -0.20117 | -0.69886 | 0.213449 | 44.35 | 24.15 | NA                     | 36.94 | -0.96 | 0.37          |                    |                             |
| AA0807W2X2 | NADH dehydrogenase [ubiquinone] 1 beta subcomplex subunit 6                                             | NDFU6     | 1.20         | 0.369139                | -0.19721 | -0.56862 | -1.22015 | -0.29643 | 27.41 | 31.48                  | NA    | 32.49 | -0.38         | 0.33               | 0.65927                     | -0.24251                | -0.67206 | -1.87464 | -0.37836 | 48.21 | 55.75 | NA                     | 17.22 | -0.50 | 0.38          |                    |                             |
| BZK761     | cDNA, FLJ93299, highly similar to Homo sapiens sterol carrier protein 2 (SCP2), mRNA                    | NA        | 5.00         | 0.28675                 | 0.485969 | 0.197837 | 0.004085 | 1.38319  | 10.05 | 9.40                   | NA    | 49.68 | 0.47          | 0.25               | 0.596457                    | 0.674459                | 0.538416 | 0.487984 | 0.981469 | 3.82  | 2.47  | NA                     | 47.34 | -0.66 | 0.04          |                    |                             |
| B4DLN1     | Uncharacterized protein                                                                                 | NA        | 2.40         | -0.22045                | 0.489624 | -0.60404 | -0.2958  | 0.383786 | 14.58 | 15.05                  | NA    | 27.54 | -0.05         | 0.94               | -0.05016                    | 0.998577                | -1.24218 | -0.98608 | -0.59118 | 49.26 | 16.88 | NA                     | 60.94 | -0.36 | 0.48          |                    |                             |
| B4E1S3     | cDNA FLJ57860, highly similar to Transmembrane protein 109                                              | NA        | 1.40         | -0.11553                | 0.188024 | 0.268414 | -0.09493 | 0.405649 | 6.82  | 17.71                  | NA    | 13.95 | 0.13          | 0.27               | -0.0853                     | -0.01895                | -0.42317 | -0.50663 | 0.355595 | 3.40  | 5.76  | NA                     | 26.71 | -0.12 | 0.88          |                    |                             |
| B7Z4V9     | cDNA FLJ57541, highly similar to Skeletal muscle and kidney-enriched inositol phosphatase (EC 3.1.3.56) | NA        | 2.60         | 0.017997                | -0.22046 | -0.44116 | -0.41622 | 0.458814 | 11.66 | 12.22                  | NA    | 31.80 | -0.22         | 0.94               | 0.087978                    | -0.07624                | -0.92962 | -0.24832 | 0.817793 | 8.04  | 32.59 | NA                     | 48.15 | -0.07 | 0.20          |                    |                             |
| E9PEB5     | Far upstream element-binding protein 1                                                                  | FUBP1     | 3.00         | 1.535095                | 0.976653 | 1.503732 | 1.750222 | 1.036149 | 27.03 | 12.05                  | NA    | 21.01 | 1.36          | 0.02               | 1.180888                    | 0.928514                | 1.24057  | 1.493551 | 1.009602 | 12.34 | 12.37 | NA                     | 14.08 | -1.17 | 0.01          |                    |                             |
| HOY109     | Methyltransferase-like protein 7A (Fragment)                                                            | METTL7A   | 1.20         | -1.45246                | -0.82771 | -0.68482 | -1.49986 | 0.869631 | 30.15 | 38.92                  | NA    | 84.20 | -0.72         | 0.56               | -1.52488                    | -0.85764                | 0.205776 | -0.57641 | -0.45847 | 32.13 | 32.42 | NA                     | 33.42 | -0.64 | 0.18          |                    |                             |
| H7C1U8     | MIC                                                                                                     | APOO      | 1.60         | -0.27121                | -0.29933 | -0.93142 | -0.93921 | -0.27524 | 1.38  | 0.38                   | NA    | 23.99 | -0.54         | 0.15               | 0.091479                    | -0.0357                 | -0.8911  | -0.52576 | -0.19367 | 6.23  | 17.81 | NA                     | 24.41 | -0.31 | 0.31          |                    |                             |
| CS5G17     | NADH dehydrogenase (Ubiquinone) Fe-S protein 8, 23kDa (NADH-coenzyme Q reductase) variant (Fragment NA) | NA        | 1.60         | -0.36316                | -0.20397 | -0.55649 | -0.99172 | -0.84548 | 7.79  | 21.17                  | NA    | 22.93 | -0.07         | 0.07               | -0.75697                    | -0.17329                | -0.58988 | -1.00025 | 0.224486 | 28.22 | 21.47 | NA                     | 36.10 | -0.45 | 0.37          |                    |                             |
| CS5GF8     | Isocitrate dehydrogenase [NAD] subunit, mitochondrial (Fragment)                                        | NA        | 7.00         | -0.2201                 | -0.4629  | -0.62228 | -0.69399 | -0.77221 | 11.87 | 3.51                   | NA    | 16.11 | -0.55         | 0.04               | -0.39214                    | -0.51171                | -0.79884 | -0.88765 | -0.59862 | 5.86  | 4.33  | NA                     | 13.46 | -0.64 | 0.03          |                    |                             |
| CS5X12     | V-type proton ATPase subunit a                                                                          | NA        | 7.80         | -0.27216                | -0.31719 | -0.50254 | -0.74709 | -0.36467 | 2.21  | 12.05                  | NA    | 11.54 | -0.44         | 0.05               | -0.76365                    | -0.77651                | -0.34804 | -0.60031 | -0.4233  | 6.35  | 12.35 | NA                     | 12.57 | -0.58 | 0.04          |                    |                             |
| CS5Z19     | Amino oxidase [flavin-containing]                                                                       | MAOA      | 3.20         | -1.40165                | -1.19147 | -1.15516 | -1.72443 | -1.00263 | 7.99  | 0.85                   | NA    | 6.90  | -1.17         | 0.00               | 0.076595                    | -0.78051                | -0.82231 | -0.79044 | 38.92    | 24.1  | NA    | 30.16                  | -0.74 | 0.04  |               |                    |                             |
| CS5ZU9     | Tripeptidyl-peptidase 2                                                                                 | TPP2      | 3.80         | -0.8397                 | -0.23134 | -0.43649 | -0.95868 | -0.18343 | 19.09 | 30.09                  | NA    | 45.94 | -0.48         | 0.28               | -1.30028                    | -0.47205                | -0.35806 | -0.74972 | 0.463637 | 0.03  | 0.08  | NA                     | 62.76 | -0.68 | 0.46          |                    |                             |
| O6FGB3     | PCBD protein (Fragment)                                                                                 | PCBD      | 2.80         | 0.54057                 | 0.068037 | 0.813363 | 0.516322 | -0.75041 | 23.22 | 14.49                  | NA    | 44.29 | 0.24          | 0.88               | 0.401222                    | 0.247266                | 0.684943 | 0.465498 | -0.98689 | 7.54  | 10.81 | NA                     | 47.63 | -0.16 | 0.93          |                    |                             |
| O6FHU3     | PSME1 protein (Fragment)                                                                                | PSME1     | 2.60         | 0.623996                | 0.470297 | -0.06035 | 0.441167 | -0.18042 | 7.53  | 24.34                  | NA    | 24.87 | 0.26          | 0.47               | 1.156717                    | -0.00995                | -0.34161 | 0.008555 | 0.136462 | 54.26 | 17.08 | NA                     | 30.59 | -0.19 | 0.49          |                    |                             |
| O6IAQ1     | LYPLA1 protein                                                                                          | LYPLA1    | 4.20         | 0.41548                 | -0.07981 | -0.55104 | -0.18316 | 0.279593 | 24.04 | 17.93                  | NA    | 22.12 | -0.02         | 0.91               | -0.12752                    | 0.280121                | -0.54885 | -0.696   | 0.294762 | 19.85 | 7.21  | NA                     | 30.31 | -0.16 | 0.79          |                    |                             |
| QBWVJ5     | Protein kinase C inhibitor-2                                                                            | NA        | 2.60         | -0.99078                | -1.62207 | -0.60646 | -1.1017  | -0.82181 | 30.46 | 24.04                  | NA    | 16.81 | -1.03         | 0.02               | -0.93279                    | -2.43464                | -0.54294 | -1.14733 | -0.68823 | 67.61 | 29.20 | NA                     | 27.43 | -1.15 | 0.07          |                    |                             |
| P08247     | Synaptophysin                                                                                           | SYP       | 3.40         | -1.13723                | -1.7484  | -0.9631  | -1.76783 | -0.18165 | 29.52 | 38.45                  | NA    | 17.31 | -1.08         | 0.01               | -1.22583                    | -1.90101                | -0.92721 | -1.54293 | -1.89087 | 32.50 | 29.73 | NA                     | 24.53 | -1.50 | 0.01          |                    |                             |
| P21912     | Succinate dehydrogenase [ubiquinone] iron-sulfur subunit, mitochondrial                                 | SDHB      | 1.60         | -0.8077                 | -1.24073 | -1.43076 | -2.39007 | -0.98533 | 21.07 | 45.36                  | NA    | 38.11 | -1.30         | 0.09               | -0.67632                    | -0.76074                | -1.47982 | -1.36016 | -0.4256  | 4.14  | 5.86  | NA                     | 32.56 | -0.94 | 0.10          |                    |                             |
| AA024R8T0  | Integrin beta                                                                                           | ITGBA     | 2.20         | 1.472631                | 1.594711 | 1.434225 | 2.570083 | 1.945228 | 5.95  | 52.36                  | NA    | 19.63 | 1.80          | 0.01               | 1.325605                    | 1.081709                | 0.927328 | 2.058359 | 2.515707 | 11.93 | 51.49 | NA                     | 48.50 | 1.59  | 0.05          |                    |                             |
| AA024R0C9  | Hydroxybutyrate dehydrogenase, type 2, isoform CRA_b                                                    | BDH2      | 3.80         | 0.5114                  | 0.321972 | 0.379959 | 0.799248 | 0.381248 | 2.89  | 24.81                  | NA    | 12.21 | 0.11          | 0.04               | 0.423743                    | 0.202149                | -0.21099 | 0.321401 | 0.4715   | 19.61 | 28.40 | NA                     | 28.40 | 0.45  | 0.48          |                    |                             |
| B1         |                                                                                                         |           |              |                         |          |          |          |          |       |                        |       |       |               |                    |                             |                         |          |          |          |       |       |                        |       |       |               |                    |                             |

| UniProt   | Protein name                                                                                               | Gene name      | Peptide mean | 08/017 HESC-RPE to hRPE |          |          |          |          |          | 08/023 HESC-RPE to hRPE |       |       |               |          |          | Fold change (mean) | Unadjusted p-value (t-test) |          |          |                        |          |       |               |       |       |       |      |
|-----------|------------------------------------------------------------------------------------------------------------|----------------|--------------|-------------------------|----------|----------|----------|----------|----------|-------------------------|-------|-------|---------------|----------|----------|--------------------|-----------------------------|----------|----------|------------------------|----------|-------|---------------|-------|-------|-------|------|
|           |                                                                                                            |                |              | Analysis                |          |          |          |          |          | Technical replicate CV  |       |       | Biological CV | Analysis |          |                    |                             |          |          | Technical replicate CV |          |       | Biological CV |       |       |       |      |
|           |                                                                                                            |                |              | 1.1                     | 1.2      | 2.1      | 2.2      | 3.1      | 3.2      | 1                       | 2     | 3     |               | 1.1      | 1.2      |                    |                             | 2.1      | 2.2      | 3.1                    | 3.2      | 1     |               | 2     | 3     |       |      |
| K7L7C7    | 60S ribosomal protein L27 (Fragment)                                                                       | RPL27          | 1.20         | 0.5154                  | 0.220493 | 1.613635 | 1.183829 | 0.682852 | 14.40    | NA                      | 24.31 | 42.52 | 0.84          | 0.11     | 0.569247 | 0.554753           | 1.349275                    | 1.09415  | 0.712763 | 0.71                   | NA       | 18.58 | 27.44         | 0.86  | 0.05  |       |      |
| P04271    | Protein S100-B                                                                                             | S100B          | 2.40         | -0.18611                |          | 0.516666 | -0.13518 | -0.58482 | -0.57426 | NA                      | 31.42 | 0.52  | 27.79         | -0.19    | 0.48     | 2.362759           | 1.477197                    | 1.572883 | 0.486047 | 0.675179               | NA       | 4.69  | 9.26          | 57.88 | 1.31  | 0.10  |      |
| P04844    | Dolichyl-diphosphooligosaccharide-protein glycosyltransferase subunit 2                                    | RPN2           | 7.20         | 0.903646                |          | 0.163934 | -0.03914 | 0.390969 | 0.449531 | NA                      | 9.94  | 2.87  | 29.45         | 0.37     | 0.20     | 1.256116           | 0.280407                    | -0.23223 | 0.610446 | 0.503073               | NA       | 21.43 | 5.26          | 43.46 | 0.24  | 0.24  |      |
| P16401    | HIST1H1B                                                                                                   | HIST1H1B       | 5.40         | 1.29687                 |          | 1.619964 | 1.947181 | 1.535453 | 2.209149 | NA                      | 15.97 | 32.43 | 21.19         | 1.72     | 0.01     | 1.599353           | 0.849711                    | 0.860893 | 0.25862  | 0.045208               | NA       | 0.55  | 14.84         | 57.41 | 0.62  | 0.25  |      |
| Q15147    | Calpain-3                                                                                                  | CNN3           | 2.40         | -0.04661                |          | 0.150863 | 0.426334 | 0.289285 | 0.500371 | NA                      | 13.46 | 10.33 | 15.51         | 0.26     | 0.25     | 1.006668           | 0.300662                    | 1.083107 | -0.2071  | 0.076204               | NA       | 37.45 | 13.84         | 34.51 | 0.45  | 0.23  |      |
| Q8N142    | Adenylysuccinate synthetase isozyme 1                                                                      | ADSS1          | 5.00         | 1.800788                |          | 1.573164 | 2.225313 | 0.245973 | 1.138237 | NA                      | 31.43 | 42.39 | 38.16         | 1.40     | 0.06     | 1.369856           | 1.122449                    | 1.982673 | 0.702395 | 0.740579               | NA       | 40.96 | 1.87          | 29.59 | 1.18  | 0.08  |      |
| AA024R203 | ADP-ribosylation factor 1, isoform CRA_a                                                                   | ARF1           | 6.00         | -0.42586                |          | 0.206822 | 0.234932 | -0.55289 | -1.00538 | NA                      | 1.45  | 22.00 | 35.95         | -0.31    | 0.01     | -0.43712           | -0.127744                   | 0.176053 | -0.31641 | -0.52192               | NA       | 14.82 | 10.06         | 19.22 | 0.26  | 0.21  |      |
| AA024R648 | Tryptophanyl-RNA synthetase, isoform CRA_a                                                                 | WARS           | 2.20         | 0.328331                |          | 0.165826 | 0.338993 | -0.08693 | 0.530526 | NA                      | 8.48  | 29.81 | 29.27         | 0.01     | 0.01     | 0.771212           | 0.311923                    | 0.00749  | 0.238636 | -0.22636               | NA       | 11.49 | 22.60         | 11.98 | 0.15  | 0.21  |      |
| AA024R834 | Pirin (iron-binding nuclear protein), isoform CRA_a                                                        | PIR            | 1.20         | 1.10522                 |          | 0.019984 | 0.549246 | 0.3034   | 0.653772 | NA                      | 13.23 | 17.09 | 22.37         | 0.69     | 0.05     | 1.125421           | 0.013852                    | 1.069824 | -0.39798 | -0.18148               | NA       | 49.56 | 10.59         | 44.86 | 0.38  | 0.28  |      |
| A8K4W8    | cDNA FLJ7917, highly similar to Homo sapiens ubiquitin-conjugating enzyme E2L 3 (UBE2L3), transcript va NA | NA             | 2.40         | 0.127465                |          | 0.163224 | 0.117538 | -0.97512 | -0.61027 | NA                      | 2.24  | 17.79 | 32.16         | -0.24    | 0.63     | 0.337446           | 0.628091                    | 1.004913 | -0.27304 | -0.1998                | NA       | 18.36 | 3.59          | 35.83 | 0.30  | 0.42  |      |
| B4DM2A    | cDNA FLJ54023, highly similar to Heat shock protein HSP 90-beta                                            | NA             | 27.00        | 0.332402                |          | 0.510353 | 0.764104 | 0.240186 | -0.17594 | NA                      | 12.41 | 20.26 | 20.63         | 0.33     | 0.20     | 0.220826           | 0.411363                    | 0.399498 | 0.10966  | -0.17156               | NA       | 0.58  | 13.74         | 14.74 | 0.14  | 0.26  |      |
| B4D7A2    | cDNA FLJ60148, highly similar to Homo sapiens heterogenous nuclear ribonucleoprotein D-like (HNRPDL), NA   | NA             | 4.60         | -0.58467                |          | 0.123262 | -0.46124 | 0.595201 | -0.0922  | NA                      | 28.69 | 33.07 | 29.92         | -0.08    | 0.56     | -0.49246           | 0.126859                    | -0.38433 | 0.044388 | 0.02494                | NA       | 32.80 | 0.95          | 18.10 | -0.14 | 0.34  |      |
| ESR199    | 60S ribosomal protein L30 (Fragment)                                                                       | RPL30          | 2.00         | -0.4835                 |          | -0.23526 | 0.552126 | -0.27253 | 0.635784 | NA                      | 37.66 | 43.10 | 26.00         | 0.04     | 0.85     | 0.241918           | -0.38424                    | 0.297651 | -0.61864 | 0.535783               | NA       | 24.81 | 5.74          | 8.84  | 0.01  | 0.64  |      |
| FSH2F4    | 1-C-tetrahydrofolate synthase, cytoplasmic                                                                 | MTHFD1         | 1.60         | 0.050864                |          | 0.334017 | -0.03563 | -0.06264 | -0.02739 | NA                      | 18.02 | 1.73  | 7.16          | 0.05     | 0.45     | 0.012871           | 0.529327                    | 0.316011 | -0.15046 | -0.47742               | NA       | 10.44 | 15.96         | 25.62 | 0.40  | 0.87  |      |
| Q72X33    | Purative uncharacterized protein DKFZp686E12166                                                            | DKFZp686E12166 | 4.60         | 1.304062                |          | 0.616978 | 0.502931 | 1.207206 | 1.026676 | NA                      | 15.33 | 8.84  | 21.55         | 0.97     | 0.03     | 1.155931           | 0.459639                    | 0.47751  | 1.451534 | 0.974513               | NA       | 0.88  | 23.17         | 26.48 | 0.90  | 0.06  |      |
| Q72Y53    | Small nuclear ribonucleoprotein Sm D1                                                                      | SNRPD1         | 1.00         | -0.97617                |          | 0.617129 | 1.164858 | -1.37105 | -1.3852  | NA                      | 16.96 | 0.69  | 92.29         | -0.35    | 0.60     | -0.84122           | 0.54814                     | 0.731302 | 0.808075 | -0.85055               | NA       | 8.97  | 2.05          | 64.63 | -0.24 | 0.56  |      |
| Q8TAS0    | ATP synthase subunit gamma (Fragment)                                                                      | NA             | 8.40         | -0.52595                |          | -1.60929 | -1.33384 | -0.7796  | -1.11927 | NA                      | 13.46 | 16.57 | 31.59         | -1.07    | 0.07     | -0.49303           | -1.537                      | -1.9805  | 0.53447  | -0.47891               | NA       | 9.3   | 2.72          | 34.91 | 0.90  | 0.20  |      |
| Q9A91     | RPS4X protein (Fragment)                                                                                   | RPS4X          | 1.80         | 0                       |          | 0.068078 | -0.027   | 0.033644 | 0.645484 | NA                      | 4.66  | 29.55 | 15.01         | 0.14     | 0.39     | 0.326453           | 0.337383                    | 0.014563 | 0.23776  | 0.105951               | NA       | 15.76 | 6.46          | 6.01  | 0.20  | 0.05  |      |
| U3K0K0    | Histone H2B                                                                                                | HIST1H2BN      | 19.20        | -2.80873                |          | -1.77148 | -2.28355 | -0.10383 | -0.83007 | NA                      | 27.68 | 8.99  | 64.27         | -1.73    | 0.07     | -1.88304           | -1.12827                    | -1.45937 | 1.27654  | -1.23238               | NA       | 16.16 | 2.16          | 22.65 | -1.40 | 0.02  |      |
| U15260    | Surfeit locus protein 4                                                                                    | SURF4          | 3.00         | 0.520623                |          | 0.65051  | 0.510353 | -0.1026  | 0.973543 | NA                      | 6.86  | 50.43 | 2.26          | 0.51     | 0.01     | 0.621456           | 0.163472                    | 0.087626 | 0.64499  | 0.284955               | NA       | 3.72  | 10.78         | 17.22 | -0.20 | 0.19  |      |
| P60866    | 40S ribosomal protein S20                                                                                  | RPS20          | 2.60         | 0.359965                |          | 0.648144 | 0.255992 | 0.841701 | 1.048022 | NA                      | 19.10 | 10.10 | 22.77         | 0.63     | 0.08     | 0.962597           | 0.741564                    | 0.703988 | 0.800753 | 0.23125                | NA       | 1.84  | 27.56         | 14.67 | 0.69  | 0.03  |      |
| Q9H0U4    | RAB18 protein (Fragment)                                                                                   | RAB18          | 6.80         | -1.39232                |          | -0.18197 | -0.75087 | -0.29225 | 0.036975 | NA                      | 27.53 | 16.07 | 40.41         | -0.52    | 0.22     | -0.34101           | -0.81923                    | -0.67732 | -1.10929 | -0.44209               | NA       | 6.95  | 32.13         | 16.72 | -0.68 | 0.05  |      |
| A8MUJ2    | Small ubiquitin-related modifier 3                                                                         | SUMO3          | 1.00         | -0.4263                 |          | 0.268414 | 0.41481  | -0.72983 | -0.60811 | NA                      | 32.87 | 5.96  | 22.61         | -0.38    | 0.15     | -0.63354           | -0.41024                    | -0.00025 | -0.64362 | -1.11551               | NA       | 19.96 | 22.92         | 24.25 | -0.56 | 0.10  |      |
| F27348    | 14-3-3 protein theta                                                                                       | YWHAQ          | 8.80         | 0                       |          | 0.593291 | 1.080665 | -0.39319 | -0.33958 | -0.99802                | NA    | 66.55 | 31.72         | 40.03    | -0.01    | 0.84               | 0.262594                    | 0.993787 | -0.0791  | 0.67567                | -0.17833 | NA    | 50.29         | 12.21 | 20.68 | 0.20  | 0.02 |
| AA024R529 | Pyruvate kinase                                                                                            | PKM2           | 64.80        | 0                       |          | -2.15032 | -1.56313 | -1.58272 | -1.62802 | -1.86626                | NA    | 0.96  | 11.75         | 19.67    | -1.76    | 0.01               | -2.58518                    | -1.72629 | -1.86266 | -1.65465               | -1.9759  | NA    | 6.68          | 15.68 | 28.19 | -1.96 | 0.02 |
| B2R4M6    | Protein S100                                                                                               | NA             | 2.20         |                         |          | -0.53341 | -1.98077 | -1.73938 | -2.31433 | -2.80467                | NA    | 12.11 | 72.32         | -1.88    | 0.11     | 0.153897           | -1.67491                    | -1.12734 | -0.32070 | -2.4691                | NA       | 24.61 | 27.48         | 91.20 | -1.63 | 0.25  |      |
| B4DSW9    | cDNA FLJ59415, highly similar to Beta-catenin                                                              | NA             | 4.60         | 0                       |          | 0.313399 | 0.286564 | -0.40955 | 0.165624 | 0.361408                | NA    | 33.47 | 9.58          | 12.06    | 0.14     | 0.28               | 1.383824                    | 0.443167 | -0.80332 | 0.103032               | -0.11314 | NA    | 57.56         | 5.96  | 62.66 | 0.18  | 0.52 |
| D9W19P    | Beta-2-glycoprotein 1 (Fragment)                                                                           | NA             | 1.20         | 1.300894                |          | 1.435892 | 1.161807 | 1.952719 | 2.087996 | NA                      | 13.99 | 6.63  | 30.68         | 1.59     | 0.02     | 1.318884           | 0.788003                    | 0.89223  | 1.759758 | 1.731517               | NA       | 5.10  | 1.38          | 30.72 | 1.30  | 0.04  |      |
| Q535S8    | Epididymis secretory protein LI 85                                                                         | PCBP1          | 4.60         | 0.052013                |          | 0.115334 | 0.055726 | 0.412555 | 0.125791 | NA                      | 2.92  | 14.01 | 8.56          | 0.15     | 0.18     | 0.618864           | 0.21907                     | 0.496774 | 0.135303 | -0.14267               | NA       | 13.92 | 13.58         | 20.95 | 0.26  | 0.22  |      |
| Q59GL1    | Synaptotagmin binding, cytoplasmic RNA interacting protein variant (Fragment)                              | NA             | 3.60         | -0.44341                |          | -0.17747 | -0.15207 | -1.18729 | 1.090227 | NA                      | 1.24  | 63.16 | 9.82          | -0.35    | 0.07     | -0.38545           | -0.09735                    | -0.04798 | -0.20973 | 0.230703               | NA       | 2.42  | 21.42         | 14.39 | -0.10 | 0.34  |      |
| Q59GY2    | Ribosomal protein L4 variant (Fragment)                                                                    | NA             | 1.80         | 0                       |          | 0.164177 | 1.452257 | 0.544735 | 1.488051 | 0.977209                | NA    | 43.07 | 24.78         | 35.52    | 0.93     | 0.13               | 0.353704                    | 1.118375 | 0.855046 | 0.605834               | 1.387975 | NA    | 12.87         | 20.53 | 25.92 | 0.62  | 0.11 |
| Q6Z1V6    | NADH-cytochrome b5 reductase                                                                               | NUCB2          | 3.80         | 0                       |          | -0.39768 | -0.4247  | -0.5998  | -0.60488 | -0.58949                | NA    | 5.57  | 0.75          | 6.96     | -0.52    | 0.01               | -0.35328                    | -0.57991 | -0.52068 | -0.5944                | -0.55803 | NA    | 2.90          | 1.78  | 8.83  | -0.52 | 0.02 |
| V9HW75    | Epididymis secretory protein LI 109                                                                        | NUCB2          | 1.80         | 0                       |          | 0.797996 | -0.03216 | -0.13692 | -0.53962 | 0.862964                | NA    | 8.13  | 63.80         | 30.54    | 0.19     | 0.38               | 0.436473                    | 0.031786 | 0.3152   | 0.42938                | 0.783874 | NA    | 13.85         | 56.19 | 8.89  | 0.23  | 0.09 |
| V9HW17    | Epididymis secretory sperm binding protein LI 70p                                                          | NA             | 4.40         | 0                       |          | 2.708129 | 1.39307  | 1.33248  | 0.29977  | 0.39178                 | NA    | 1270  | 4.51          | 81.2     | 0.17     | 0.01               | 2.07853                     | 1.46196  | 0.93189  | 0.276155               | 0.656556 | NA    | 10.47         | 18.53 | 57.80 | 1.02  | 0.13 |
| P02449    | Apollipoprotein E                                                                                          | APOE           | 2.40         | 0                       |          | 0.43017  | -0.40071 | -0.26982 | -0.76788 | -1.13068                | NA    | 6.41  | 30.73         | 38.02    | -0.22    | 0.74               | 0.988405                    | 1.12512  | 0.52104  | -0.22391               | 0.423734 | NA    | 72.94         | 11.22 | 29.63 | 0.36  | 0.22 |
| Q05682    | Caldesmon                                                                                                  | CALD1          | 3.00         | 0                       |          | 1.915068 | 1.028865 | 0.915036 | 1.723032 | 0.822859                | NA    | 5.58  | 42.74         | 33.53    | 1.28     | 0.04               | 2.14465                     | 2.897089 | 2.251019 | 2.436027               | 1.435657 | NA    | 31.15         | 47.16 | 22.43 | 0.23  | 0.01 |
| Q9P2E9    | Ribosome-binding protein 1                                                                                 | RRBP1          | 4.20         | 1.200643                |          | 1.093267 | 0.114619 | -0.03559 | -0.05444 | NA                      | 46.21 | 0.92  | 40.90         | 0.46     | 0.24     | 1.010976           | 1.552115                    | 0.342922 | 0.023993 | -0.12973               | NA       | 56.02 | 7.53          | 37.32 | 0.56  | 0.21  |      |
| E9PL57    | Protein NEDD8-MDP1 (Fragment)                                                                              | NEDD8-MDP1     | 1.40         | -0.05317                |          | 0.178294 | 0.215469 | 0.467069 | -0.66345 | NA                      | 1.82  | 52.74 | 9.18          | 0.03     | 0.88     | 0.413329           | 0.433643                    | 0.952282 | 0.493116 | 0.27985                | NA       | 25.15 | 10.43         | 13.02 | 0.51  | 0.02  |      |
| O145      |                                                                                                            |                |              |                         |          |          |          |          |          |                         |       |       |               |          |          |                    |                             |          |          |                        |          |       |               |       |       |       |      |

| UniProt     | Protein name                                                              | Gene name  | Peptide mean | 08/017 HESC-RPE to hRPE |          |          |          |          |          |                        |          |          |            | 08/023 HESC-RPE to hRPE |                             |          |          |          |          |          |          |                        |          |          |            |                    |                             |       |       |      |
|-------------|---------------------------------------------------------------------------|------------|--------------|-------------------------|----------|----------|----------|----------|----------|------------------------|----------|----------|------------|-------------------------|-----------------------------|----------|----------|----------|----------|----------|----------|------------------------|----------|----------|------------|--------------------|-----------------------------|-------|-------|------|
|             |                                                                           |            |              | Analysis                |          |          |          |          |          | Technical replicate CV |          |          | Biological | Fold change (mean)      | Unadjusted p-value (t-test) | Analysis |          |          |          |          |          | Technical replicate CV |          |          | Biological | Fold change (mean) | Unadjusted p-value (t-test) |       |       |      |
|             |                                                                           |            |              | 1.1                     | 1.2      | 2.1      | 2.2      | 3.1      | 3.2      | 1                      | 2        | 3        | CV         |                         |                             | 1.1      | 1.2      | 2.1      | 2.2      | 3.1      | 3.2      | 1                      | 2        | 3        | CV         |                    |                             |       |       |      |
| J3KR4       | 5'(3')-deoxyribonucleotidase, cytosolic type                              | N15C       | 2.00         | -0.82887                | -1.40898 | -2.31084 |          |          |          |                        | -1.83965 | 28.06    | NA         | NA                      | 43.54                       | -1.60    | 0.04     | -1.71464 | -1.39933 | -3.38954 |          |                        |          | -0.92055 | 15.39      | NA                 | NA                          | 67.46 | -1.86 | 0.12 |
| S4R371      | Fatty acid-binding protein, heart (Fragment)                              | FABP3      | 2.25         | 2.203669                | 1.379310 | 1.878319 |          |          |          |                        | 1.110245 | 41.15    | NA         | NA                      | 13.35                       | 1.00     | 0.00     | 1.096201 | -1.08744 | 1.553409 |          |                        |          | 1.372066 | 90.39      | NA                 | NA                          | 37.75 | 0.73  | 0.18 |
| O15540      | Fatty acid-binding protein, brain                                         | FABP7      | 2.00         | -0.58674                | -1.20179 |          | -0.44572 | -0.46575 |          |                        | 29.70    | 29.70    | NA         | NA                      | 15.44                       | -0.67    | 0.05     | -0.87739 | -1.37398 |          |          | -0.63751               | -1.11869 | 24.10    | NA         | NA                 | 19.88                       | -1.00 | 0.03  |      |
| F5H157      | Ras-related protein Rab-35 (Fragment)                                     | RAB35      | 3.75         | -1.75326                | -1.22467 |          |          |          |          | 0.11535                | 0.360698 | 25.62    | NA         | NA                      | 53.28                       | -0.63    | 0.62     | -2.67772 | -2.47572 |          |          | -1.34021               | -1.4104  | 9.88     | NA         | NA                 | 77.27                       | -1.66 | 0.19  |      |
| AA0A024R8P  | Ribosomal protein L38, isoform CRA_a                                      | RPL38      | 1.25         | -0.47663                | -0.16291 |          | 0.100181 | 0.113342 |          |                        | 15.07    | 07       | NA         | NA                      | 15.96                       | -0.11    | 0.82     | -0.29646 | -0.00221 |          |          | 0.423444               | -0.34003 | 14.37    | NA         | NA                 | 28.73                       | -0.05 | 0.93  |      |
| D3GKD8      | A-gamma globulin Oslvo variant                                            | HGB1       | 16.25        | -0.57027                | -1.52499 |          |          | -1.18616 | -2.14649 |                        |          | 45.35    | NA         | NA                      | 37.76                       | -1.36    | 0.05     | -1.14365 | -1.93768 |          |          | -1.37841               | -1.54862 | 37.96    | NA         | NA                 | 6.02                        | -1.50 | 0.00  |      |
| AA0A024R0G1 | Viscoid docking protein p115, isoform CRA_a                               | VDP        | 1.75         | 0.220958                | 0.730039 |          |          |          |          |                        | 24.70    | NA       | NA         | 33.38                   | 0.75                        | 0.09     | -0.1541  | 0.407692 |          |          | 0.221779 |                        | 1.527712 | 27.19    | NA         | NA                 | 58.53                       | 0.50  | 0.30  |      |
| O05DH1      | Proteasome subunit alpha type 1 (Fragment)                                | RMSA7      | 2.00         | 0.186777                | 0.186701 |          | -0.08594 | 0.00274  |          |                        | 0.40     | NA       | NA         | NA                      | 9.84                        | 0.07     | 0.72     | 0.89318  | 0.072204 |          |          | 0.195135               | -0.16099 | 45.63    | NA         | NA                 | 19.09                       | -0.20 | 0.55  |      |
| Q6F154      | RAB5B protein                                                             | RAB5B      | 1.50         | 0.454502                | -0.17475 |          |          | -0.6436  | -0.73692 |                        |          | 30.36    | NA         | NA                      | 37.24                       | -0.28    | 0.28     | -0.43623 | -0.27702 |          |          | 0.181626               | 0.124924 | 7.79     | NA         | NA                 | 19.14                       | -0.10 | 0.93  |      |
| Q6IB11      | Proteasome subunit beta type                                              | PSMB7      | 3.25         | -0.06812                | 0.198817 |          | 0.392993 | 0.281339 |          |                        | 13.09    | NA       | NA         | NA                      | 11.09                       | 0.20     | 0.12     | 0.506619 | 0.494715 |          |          | 0.566422               | 0.192431 | 0.58     | NA         | NA                 | 13.32                       | 0.44  | 0.07  |      |
| O14531      | Dihydropyrimidinase-related protein 4                                     | DPYSL4     | 1.50         | -0.554                  | -1.16046 |          | -0.27014 | -0.76354 |          |                        | 29.29    | NA       | NA         | 22.15                   | -0.69                       | 0.07     | -0.24232 | -1.62813 |          |          | -0.09761 | -1.75532               | 63.14    | NA       | NA         | 52.83              | -0.93                       | 0.19  |       |      |
| P25189      | Myelin protein P0                                                         | MPZ        | 3.00         | -0.6887                 | -1.00038 |          |          | -2.52587 | -1.89535 |                        |          | 15.22    | NA         | 30.42                   | 61.34                       | -1.53    | 0.27     | -0.70104 | -1.13559 |          |          | -2.66117               | -1.93767 | 21.04    | NA         | 34.74              | 61.86                       | -1.61 | 0.26  |      |
| P36871      | Phosphoglucomutase-1                                                      | PGM1       | 5.50         | 0.178973                | -0.05022 |          |          | 0.298634 | -0.11162 |                        |          | 11.21    | NA         | 19.97                   | 1.92                        | 0.08     | 0.12     | 0.286436 | 0.096933 |          |          | -0.02461               | 0.093966 | 9.27     | NA         | 5.81               | 7.78                        | 0.11  | 0.39  |      |
| P51991      | Heterogeneous nuclear ribonucleoprotein A3                                | HNRNPA3    | 5.25         | -0.96942                | -1.24703 |          |          | -0.78008 | -1.90749 |                        |          | 13.56    | NA         | 52.61                   | 6.60                        | -1.23    | 0.06     | -0.35888 | -1.05686 |          |          | -0.38172               | -0.97759 | 33.56    | NA         | 28.80              | 0.73                        | -0.69 | 0.01  |      |
| O15717      | ELAV-like protein 1                                                       | ELAVL1     | 2.50         | 0.409268                | -0.36577 |          |          | 0.358192 | 0.32444  |                        |          | 37.10    | NA         | 1.56                    | 13.16                       | 0.18     | 0.46     | 0.409529 | 0.030994 |          |          | -0.10929               | -0.15382 | 18.48    | NA         | 2.18               | 0.04                        | 0.84  | 0.04  |      |
| C9M772      | Ras-related protein Rab-18                                                | RAB18      | 2.75         | -0.46926                | -0.14821 |          |          | -0.32795 | -1.07901 |                        |          | 15.57    | NA         | 36.00                   | 17.33                       | -0.51    | 0.24     | -0.51608 | -0.01217 |          |          | -0.31976               | -0.49940 | 24.45    | NA         | 8.78               | 8.05                        | -0.34 | 0.14  |      |
| C9UNZ2      | NSL1 cofactor p47                                                         | NSL1C      | 9.25         | 0.711409                | 1.293634 |          |          | 1.21656  | 1.434498 |                        |          | 10.33    | NA         | 10.84                   | 14.50                       | 1.16     | 0.09     | 0.952325 | 1.465947 |          |          | 0.800515               | 1.128844 | 6.87     | NA         | 15.78              | 12.76                       | -1.09 | 0.04  |      |
| AA0A024R9B3 | TROVE domain family, member 2, isoform CRA_b                              | TROVE2     | 2.00         | 0.792318                | 0.399531 |          |          | 0.687582 | -0.28468 |                        |          | 16.05    | NA         | 45.93                   | 14.23                       | 0.38     | 0.28     | 0.515537 | 0.387619 |          |          | 0.912957               | 0.390476 | 4.27     | NA         | 25.33              | 10.87                       | 0.55  | 0.11  |      |
| AA0A024RA61 | Heterogeneous nuclear ribonucleoprotein A2/B1, isoform CRA_c              | HNRPA2B1   | 13.25        | -1.64058                | -1.82906 |          |          | -0.84714 | -1.04741 |                        |          | 10.98    | NA         | 9.80                    | 36.81                       | -1.33    | 0.18     | -0.62135 | -0.80934 |          |          | -1.04986               | -1.17325 | 9.20     | NA         | 6.04               | 19.38                       | -0.91 | 0.14  |      |
| AA0A024RCM3 | HCG205638, isoform CRA_a                                                  | HCG_205638 | 4.50         | -0.11937                | -0.09716 |          |          | -0.33693 | -0.25351 |                        |          | 1.09     | NA         | 4.09                    | 9.12                        | -0.20    | 0.20     | -0.57003 | -0.11438 |          |          | -0.62214               | -0.58635 | 22.15    | NA         | 1.75               | 13.67                       | -0.47 | 0.17  |      |
| A8K3Q7      | Annexin                                                                   | NA         | 28.25        | -0.1586                 | -0.69672 |          |          | -0.74545 | -0.74305 |                        |          | 26.07    | NA         | 0.12                    | 16.66                       | -0.59    | 0.17     | -0.44814 | -0.66574 |          |          | -0.76452               | -0.71083 | 10.65    | NA         | 2.63               | 9.03                        | -0.65 | 0.09  |      |
| A8K7N0      | cDNA FLJ75556, highly similar to Homo sapiens ribosomal protein L14, mRNA | NA         | 1.50         | -0.62265                | -1.92961 |          |          | 0.293625 | -0.11025 |                        |          | 60.01    | NA         | 19.68                   | 57.23                       | -0.55    | 0.55     | -1.13978 | -0.60016 |          |          | 0.31874                | 0.032077 | 23.29    | NA         | 14.00              | 49.85                       | -0.36 | 0.62  |      |
| J3KR44      | Ubiquitin thioesterase OTUB1                                              | OTUB1      | 1.25         | 0.867419                | -0.17969 |          |          | -0.01963 | -0.3013  |                        |          | 49.18    | NA         | 13.76                   | 28.54                       | 0.09     | 0.78     | -0.29136 | 0.233837 |          |          | -1.27054               | 0.323961 | 25.46    | NA         | 71.06              | 12.63                       | -0.25 | 0.46  |      |
| C53SW3      | Putative uncharacterized protein DPYSL5 (Fragment)                        | DPYSL5     | 2.25         | 0.269777                | -0.64208 |          |          | -0.5667  | -0.39216 |                        |          | 43.26    | NA         | 8.50                    | 17.65                       | -0.33    | 0.26     | 0.289307 | -0.58518 |          |          | -0.99155               | -0.33343 | 41.60    | NA         | 31.71              | 26.29                       | -0.41 | 0.36  |      |
| C16465      | Cold inducible RNA binding protein                                        | CIRBP      | 3.00         | -1.31192                | -1.28307 |          |          | -0.15663 | 0.064324 |                        |          | -0.22225 | NA         | 10.81                   | 47.99                       | -0.69    | 0.07     | -0.97007 | -1.29453 |          |          | -0.38082               | -0.20054 | 0.502488 | NA         | 24.71              | NA                          | 74.09 | -0.39 | 0.12 |
| C59EH3      | Acid phosphatase 1 isoform c variant (Fragment)                           | NA         | 2.00         | -0.73808                | 0.104513 |          |          | -0.21607 | -0.29383 |                        |          | 40.16    | NA         | 26.71                   | 13.62                       | 0.07     | 0.29     | -1.10638 | 0.34575  |          |          | 0.420661               | -0.20103 | 65.72    | NA         | 30.01              | 16.97                       | -0.14 | 0.68  |      |
| OSU071      | High-mobility group box 2                                                 | NA         | 4.25         | -0.95256                | -1.12816 |          |          | -0.49264 | -1.43859 |                        |          | 8.60     | NA         | 44.77                   | 7.26                        | -1.00    | 0.02     | -0.77448 | -0.0781  |          |          | -0.58042               | -1.23037 | 14.83    | NA         | 31.33              | 2.41                        | -0.92 | 0.01  |      |
| Q6FHJ5      | SCAMP3 protein (Fragment)                                                 | SCAMP3     | 1.25         | 0.242748                | -0.18378 |          |          | -1.23453 | 0.434341 |                        |          | 20.75    | NA         | 73.75                   | 10.58                       | -0.19    | 0.55     | 0.505518 | 0.272114 |          |          | -0.46575               | 0.14926  | 13.60    | NA         | 29.70              | 26.34                       | 0.13  | 0.73  |      |
| V9HWG9      | Epididymis secretory protein LI 21                                        | GSTO1      | 1.00         | 0.506559                | 0.684464 |          |          | 0.817633 | 0.078658 |                        |          | 8.71     | NA         | 12.76                   | 17.35                       | 0.77     | 0.14     | -0.21384 | 1.00074  |          |          | 0.35389                | 0.768233 | 60.31    | NA         | 21.08              | 0.98                        | 0.50  | 0.07  |      |
| X5DP00      | HCG15924, isoform CRA_a (Fragment)                                        | SNRPN      | 2.00         | -0.20278                | -0.25697 |          |          | 0.731939 | 1.586799 |                        |          | 2.66     | NA         | 40.71                   | 65.69                       | 0.46     | 0.62     | -0.23586 | -0.43911 |          |          | 0.279244               | 0.698454 | 9.95     | NA         | 20.40              | 39.95                       | 0.08  | 0.88  |      |
| O60664      | Perilipin-3                                                               | PLIN3      | 2.00         | 0.995465                | 1.336283 |          |          | 1.498874 | 0.824057 |                        |          | 16.63    | NA         | 32.48                   | 1.21                        | 1.16     | 0.00     | 1.499119 | 1.443458 |          |          | 1.606037               | 1.159648 | 2.73     | NA         | 21.71              | 3.50                        | 1.43  | 0.02  |      |
| O75964      | ATP synthase subunit g, mitochondrial                                     | ATP5L      | 2.75         | -0.39051                |          | -0.821   | -0.39735 | -0.34259 |          |                        | NA       | 20.62    | NA         | 9.02                    | -0.49                       | 0.03     | 0.03     | -0.42119 |          |          |          | -0.43158               | -0.21367 | -0.50865 | NA         | 10.66              | NA                          | 6.61  | -0.39 | 0.02 |
| F49327      | Fatty acid synthase                                                       | FASN       | 2.50         | -0.09079                |          | 1.28588  | 0.003559 | 1.696925 |          |                        | NA       | 57.91    | NA         | 59.90                   | 0.72                        | 0.29     | 0.29     | -0.16315 | 1.402871 |          |          | -0.68907               | 1.022059 | NA       | 87.68      | NA                 | 38.01                       | -0.39 | 0.36  |      |
| C16465      | C16orf65                                                                  | NA         | 2.75         | 0.970167                |          | 0.17532  | 1.219777 | 0.22225  |          |                        | NA       | 10.81    | NA         | 47.99                   | 0.69                        | 0.07     | 0.07     | 0.165243 |          |          |          | 0.38082                | -0.20054 | 0.502488 | NA         | 24.71              | NA                          | 74.09 | -0.39 | 0.12 |
| Q6Y116      | Hydroxysteroid dehydrogenase-like protein 2                               | HSDL2      | 1.50         | 1.10183                 |          | 0.194599 | 0.003559 | 0.702004 |          |                        | NA       | 9.35     | NA         | 33.21                   | 1.50                        | 0.10     | 0.10     | 1.422714 |          |          |          | 0.277171               | 0.175829 | 0.636285 | NA         | 4.98               | NA                          | 43.88 | 0.88  | 0.13 |
| OS3GD1      | Guanine nucleotide-binding protein subunit gamma (Fragment)               | NA         | 4.00         | 1.013519                |          | 1.321027 | 0.903948 | 2.089793 |          |                        | NA       | 20.30    | NA         | 44.22                   | 0.33                        | 0.00     | 0.00     | 1.245434 |          |          |          | 1.838433               | 0.859642 | 1.478498 | NA         | 46.21              | NA                          | 8.35  | 1.36  | 0.00 |
| OS49N0      | Cofilin 2 (Muscle), isoform CRA_a                                         | CFL2       | 4.75         | 1.088192                |          | 0.877237 | -0.12854 | 0.838421 |          |                        | NA       | 47.39    | NA         | 21.31                   | 0.67                        | 0.07     | 0.07     | 0.417179 |          |          |          | 0.553151               | 0.174488 | 0.302736 | NA         | 18.45              | NA                          | 4.01  | 0.36  | 0.01 |
| OSJR95      | 40S ribosomal protein S8                                                  | RPS8       | 2.50         | 0.738264                |          | 0.419536 | 0.710981 | 0.440533 |          |                        | NA       | 14.24    | NA         | 10.39                   | 0.58                        | 0.02     | 0.02     | 0.95719  |          |          |          | 0.295728               | 0.476604 | 0.678951 | NA         | 8.85               | NA                          | 19.56 | 0.60  | 0.05 |
| OSJRJ0      | NA                                                                        | CLE        | 2.00         | -1.20595                |          | 0.592101 | 0.358659 | -0.02773 |          |                        | NA       | 11.83    | NA         | 51.50                   | -0.07                       | 0.66     | 0.66     | -0.68404 |          |          |          | 0.230576               | -0.46528 | 0.648407 |            |                    |                             |       |       |      |

| UniProt    | Protein name                                                                                           | Gene name    | Peptide mean | 08/017 hESC-RPE to hRPE |          |          |          |       |       |                        |       |       |            |                    | 08/023 hESC-RPE to hRPE     |          |          |          |       |       |       |                        |       |      |            |                    |                             |
|------------|--------------------------------------------------------------------------------------------------------|--------------|--------------|-------------------------|----------|----------|----------|-------|-------|------------------------|-------|-------|------------|--------------------|-----------------------------|----------|----------|----------|-------|-------|-------|------------------------|-------|------|------------|--------------------|-----------------------------|
|            |                                                                                                        |              |              | Analysis                |          |          |          |       |       | Technical replicate CV |       |       | Biological | Fold change (mean) | Unadjusted p-value (t-test) | Analysis |          |          |       |       |       | Technical replicate CV |       |      | Biological | Fold change (mean) | Unadjusted p-value (t-test) |
|            |                                                                                                        |              |              | 1.1                     | 1.2      | 2.1      | 2.2      | 3.1   | 3.2   | 1                      | 2     | 3     | CV         |                    |                             | 1.1      | 1.2      | 2.1      | 2.2   | 3.1   | 3.2   | 1                      | 2     | 3    | CV         |                    |                             |
| G8L8L6     | Heterogeneous nuclear ribonucleoprotein H                                                              | HNRNPH1      | 6.50         | 0.746529                | 0.595168 | -0.19752 | 0.106755 | NA    | 7.41  | 14.86                  | 34.12 | 0.31  | 0.54       |                    | 0.583865                    | 0.171802 | -0.25516 | -0.46259 | NA    | 20.06 | 10.15 | 35.85                  | 0.01  | 0.98 |            |                    |                             |
| IL3D7      | Serine protease 33 (Fragment)                                                                          | PRSS33       | 1.00         | 0.844695                | 0.661671 | 1.241487 | 1.228699 | NA    | 8.96  | 6.63                   | 23.26 | 0.99  | 0.15       |                    | 0.656265                    | 0.829712 | 0.173207 | 0.409621 | NA    | 8.47  | 11.56 | 21.86                  | 0.52  | 0.26 |            |                    |                             |
| Q53F64     | Heterogeneous nuclear ribonucleoprotein AB isoform a variant (Fragment)                                | NA           | 2.50         | 0.689326                | 0.99088  | -1.71898 | -1.3153  | NA    | 14.73 | 19.66                  | 95.07 | -0.34 | 0.82       |                    | 1.011845                    | 0.393555 | -1.99443 | -1.06313 | NA    | 29.85 | 44.12 | 90.59                  | -0.41 | 0.77 |            |                    |                             |
| Q53FM7     | NADH dehydrogenase (Ubiquinone) Fe-S protein 3, 30kDa (NADH-coenzyme Q reductase) variant (Fragmer NA) | NDUFA6       | 6.75         | -0.7964                 | -0.40536 | -0.28321 | 0.030486 | NA    | 19.05 | 15.31                  | 22.83 | -0.36 | 0.37       |                    | -0.98264                    | -0.57566 | 0.335061 | 0.431694 | NA    | 19.82 | 47.3  | 53.52                  | -0.20 | 0.79 |            |                    |                             |
| Q53H01     | N-acetylglycosylamine amidohydrolase (Acid ceramidase) 1 preproprotein isoform a variant (Fragment)    | NA           | 9.00         | -1.28607                | -1.00859 | 0.035827 | -0.33834 | NA    | 13.56 | 18.24                  | 47.21 | -0.65 | 0.44       |                    | -1.90619                    | -1.46423 | 0.351685 | 0.415091 | NA    | 21.49 | 3.11  | 86.47                  | -0.65 | 0.64 |            |                    |                             |
| Q59F66     | DEAD box polypeptide 17 isoform p82 variant (Fragment)                                                 | NA           | 3.00         | 0.418942                | 0.480244 | 0.499962 | 0.172562 | NA    | 3.00  | 15.98                  | 5.11  | 0.39  | 0.09       |                    | 0.96183                     | 0.367189 | 0.626875 | -0.5486  | NA    | 15.84 | 54.62 | 18.66                  | 0.28  | 0.45 |            |                    |                             |
| Q68D19     | Calcium-transporting ATPase                                                                            | DKFZp686M008 | 4.00         | -0.47355                | -1.04294 | -0.65045 | -0.7124  | NA    | 27.55 | 3.04                   | 2.41  | -0.72 | 0.03       |                    | -0.7309                     | -1.15517 | -0.64346 | -0.70733 | NA    | 20.65 | 2.15  | 11.85                  | -0.81 | 0.10 |            |                    |                             |
| Q6LPS      | Ribosomal protein S2                                                                                   | RPS2         | 3.75         | 0.185304                | -0.00938 | 0.236275 | 0.733627 | NA    | 9.53  | 24.14                  | 20.20 | 0.39  | 0.29       |                    | 0.02906                     | 0.114681 | 0.123942 | 0.528974 | NA    | 4.20  | 18.72 | 13.10                  | 0.20  | 0.26 |            |                    |                             |
| Q9ADV6     | 40S ribosomal protein S6                                                                               | RPS6         | 1.75         | 1.252037                | -0.55845 | 0.421141 | 0.052935 | NA    | 78.67 | 30.48                  | 7.71  | 0.54  | 0.22       |                    | 1.132441                    | 0.035889 | 0.60882  | 0.753336 | NA    | 51.31 | 7.08  | 0.16                   | 0.63  | 0.05 |            |                    |                             |
| Q9UM54     | Unconventional myosin-V                                                                                | MYO6         | 1.50         | -0.63828                | -1.10964 | -0.96499 | -1.16999 | NA    | 22.90 | 10.03                  | 10.23 | -0.97 | 0.06       |                    | -0.7018                     | -0.72324 | -0.47061 | -1.6434  | NA    | 1.05  | 54.51 | 11.18                  | -0.88 | 0.12 |            |                    |                             |
| A0A024R417 | Leucine zipper and CTNBP1 domain containing, isoform CRA_a                                             | LYZC         | 1.75         | 0.793009                | 0.320112 | 0.814934 | 0.071413 | NA    | 22.97 | 35.66                  | 4.18  | 0.50  | 0.07       |                    | 0.390279                    | 0.027743 | -0.05264 | -0.46112 | NA    | 17.68 | 19.89 | 22.49                  | -0.02 | 0.93 |            |                    |                             |
| AK84C8     | 60S ribosomal protein L13                                                                              | RPL13        | 3.25         | 0.90383                 | 0.336699 | 0.649858 | 0.22888  | NA    | 27.44 | 20.49                  | 9.46  | 0.53  | 0.11       |                    | 0.602319                    | 0.211791 | -0.18132 | 0.432963 | NA    | 19.02 | 29.66 | 12.80                  | 0.27  | 0.31 |            |                    |                             |
| Q9J3L8     | Translocon-associated protein subunit alpha                                                            | SSR1         | 1.25         | -0.34443                | -0.00992 | -1.64454 | 0.476192 | NA    | 16.32 | 88.55                  | 2.83  | -0.38 | 0.31       |                    | -0.26724                    | -0.48457 | -0.73979 | 0.697794 | NA    | 10.63 | 65.16 | 25.35                  | -0.20 | 0.46 |            |                    |                             |
| Q14HB4     | Mitogen-activated protein kinase                                                                       | MAPK1        | 2.75         | 0.147517                | -0.26823 | -1.00933 | -0.71193 | NA    | 20.24 | 14.52                  | 38.58 | -0.46 | 0.46       |                    | -0.25904                    | -0.13121 | -0.91625 | -0.41073 | NA    | 6.26  | 24.53 | 21.77                  | -0.43 | 0.32 |            |                    |                             |
| Q94826     | Mitochondrial import receptor subunit TOM70                                                            | TOM70A       | 10.00        | 0.038842                | 0.069666 | -1.39129 |          | 1.51  | NA    | NA                     | 65.47 | -0.43 | 0.52       |                    | 0.093945                    | -0.18126 | -1.22315 |          | 13.45 | NA    | NA    | 55.06                  | -0.44 | 0.48 |            |                    |                             |
| Q52539     | Elongation factor 1-alpha 2                                                                            | EEF1A2       | 10.00        | -1.40868                | -2.82032 | -1.24982 |          | 64.22 | NA    | NA                     | 33.59 | -1.83 | 0.16       |                    | 0.72253                     | -1.2535  | -0.59193 |          | 22.82 | NA    | NA    | 41.76                  | -1.19 | 0.26 |            |                    |                             |
| C9UNL5     | Probable lysosomal cobalamin transporter                                                               | DMBRD1       | 1.00         | -0.16208                | 0.963669 | -0.11241 |          | 52.38 | NA    | NA                     | 29.65 | 0.22  | 0.66       |                    | 0.255198                    | 0.388497 | 0.050722 |          | 6.43  | NA    | NA    | 13.27                  | -0.23 | 0.26 |            |                    |                             |
| A0A024R3V8 | Translin-associated factor X, isoform CRA_c                                                            | TSNAX        | 1.00         | -0.73874                | -1.29986 | 1.513048 |          | 27.11 | NA    | NA                     | 99.05 | -0.17 | 0.88       |                    | -0.87578                    | -1.26617 | -0.33777 |          | 19.02 | NA    | NA    | 34.58                  | -0.83 | 0.34 |            |                    |                             |
| A0A024R900 | ATPase, H+ transporting, lysosomal 42kDa, V1 subunit C1, isoform CRA_a                                 | ATP6V1C1     | 2.33         | -0.42868                | -0.4893  | -0.78585 |          | 2.97  | NA    | NA                     | 17.97 | -0.57 | 0.16       |                    | -0.18241                    | -0.65148 | -0.44806 |          | 22.79 | NA    | NA    | 2.45                   | -0.43 | 0.02 |            |                    |                             |
| A0A024R9A8 | Peptidyl arginine deiminase, type II, isoform CRA_a                                                    | PADI2        | 2.33         | -0.14918                | 0.395063 | -0.20195 |          | 26.36 | NA    | NA                     | 15.09 | 0.01  | 0.85       |                    | -0.31406                    | -0.24617 | -0.66282 |          | 3.33  | NA    | NA    | 18.67                  | -0.41 | 0.25 |            |                    |                             |
| A6NP24     | Quinone oxidoreductase (Fragment)                                                                      | CRY2         | 2.33         | -0.10448                | 0.06858  | -1.73159 |          | 8.47  | NA    | NA                     | 75.43 | -0.59 | 0.49       |                    | -0.38525                    | 0.287542 | -1.04969 |          | 32.39 | NA    | NA    | 48.86                  | -0.38 | 0.47 |            |                    |                             |
| B4E106     | cDNA FLJ53399, highly similar to Monocarboxylate transporter 1                                         | NA           | 2.67         | 0.907743                | 1.070932 | 0.107975 |          | 7.99  | NA    | NA                     | 42.01 | 0.74  | 0.43       |                    | 0.982141                    | 1.154491 | 1.976721 |          | 8.44  | NA    | NA    | 42.99                  | 1.37  | 0.18 |            |                    |                             |
| B4E192     | cDNA FLJ54224, highly similar to Glial fibrillary acidic protein, astrocyte                            | NA           | 15.00        | -0.7299                 | -1.0776  | -1.51992 |          | 16.96 | NA    | NA                     | 30.24 | -1.11 | 0.16       |                    | -1.16757                    | -0.98968 | -1.1189  |          | 1.01  | NA    | NA    | 2.11                   | -1.09 | 0.01 |            |                    |                             |
| B7ZACD     | cDNA, FLJ79134, highly similar to Dynamin-1 (EC 3.6.5.5)                                               | NA           | 3.33         | 0.483373                | -0.0778  | 0.245121 |          | 27.16 | NA    | NA                     | 0.75  | 0.22  | 0.06       |                    | 0.035282                    | 0.056397 | 0.167082 |          | 8.73  | NA    | NA    | 5.94                   | 0.09  | 0.33 |            |                    |                             |
| K7ELJ7     | Calpain small subunit 1                                                                                | CAPNS1       | 4.00         | 1.354202                | 0.261293 | 0.111414 |          | 4.00  | NA    | NA                     | 38.12 | 0.58  | 0.41       |                    | 0.96776                     | 0.312776 | 0.11247  |          | 31.56 | NA    | NA    | 27.39                  | 0.46  | 0.39 |            |                    |                             |
| C53GD0     | Hydroxysteroid (17-beta) dehydrogenase 2 variant (Fragment)                                            | NA           | 2.33         | 0.389719                | 2.495897 | -0.11585 |          | 88.11 | NA    | NA                     | 82.08 | 0.92  | 0.55       |                    | 0.165829                    | 2.274029 | 0.621855 |          | 88.17 | NA    | NA    | 45.09                  | 1.02  | 0.20 |            |                    |                             |
| Q7Z4F3     | Caveolin                                                                                               | NA           | 1.00         | -1.34155                | -0.07201 | -1.36306 |          | 58.58 | NA    | NA                     | 37.92 | -0.92 | 0.20       |                    | -1.0445                     | 0.200474 | 0.422735 |          | 57.50 | NA    | NA    | 34.32                  | -1.14 | 1.00 |            |                    |                             |
| S4R435     | Protein RPS10-NUDT3 (Fragment)                                                                         | RPS10-NUDT3  | 1.33         | 0.294865                | -0.26265 | 0.245568 |          | 26.99 | NA    | NA                     | 9.92  | 0.09  | 0.46       |                    | 0.047843                    | 0.526424 | 0.091432 |          | 23.24 | NA    | NA    | 10.54                  | -1.22 | 0.30 |            |                    |                             |
| V9HW6      | Alpha-1 acid glycoprotein                                                                              | HELS-153w    | 1.33         | -2.86212                | -1.29234 | -1.2984  |          | 70.15 | NA    | NA                     | 27.22 | -1.82 | 0.14       |                    | -1.68866                    | -1.89772 | -0.84037 |          | 10.32 | NA    | NA    | 44.86                  | -0.47 | 0.22 |            |                    |                             |
| Q8NF37     | Lysophosphatidylcholine acyltransferase 1                                                              | LPCAT1       | 1.33         | -0.42815                | -0.44418 | -1.37701 |          | 0.79  | NA    | NA                     | 44.55 | -0.75 | 0.30       |                    | -0.10284                    | -0.98487 | -1.99019 |          | 41.93 | NA    | NA    | 68.02                  | -1.03 | 0.33 |            |                    |                             |
| C9P0L0     | Vesicle-associated membrane protein-associated protein A                                               | VAPA         | 2.67         | 0.310029                | -0.13648 | -0.27619 |          | 21.71 | NA    | NA                     | 18.53 | -0.39 | 0.68       |                    | 0.502449                    | -0.19684 | 0.089762 |          | 33.62 | NA    | NA    | 5.14                   | 0.13  | 0.16 |            |                    |                             |
| A0A024QZB4 | Sulfotransferase                                                                                       | HCG_1993905  | 1.33         | -0.64004                | 0.313857 | 0.268958 |          | 45.12 | NA    | NA                     | 17.29 | -0.02 | 0.85       |                    | -0.26637                    | -0.01952 | 0.566933 |          | 12.07 | NA    | NA    | 33.86                  | 0.09  | 0.66 |            |                    |                             |
| B2K6D0     | cDNA, FLJ92896, highly similar to Homo sapiens proteasome (prosome, macropain) 26S subunit, non-ATP-a  | NA           | 2.00         | 0.935501                | 0.619598 | 0.592198 |          | 15.44 | NA    | NA                     | 9.50  | 0.72  | 0.09       |                    | 0.808607                    | 0.502047 | 0.404082 |          | 14.97 | NA    | NA    | 12.68                  | 0.57  | 0.15 |            |                    |                             |
| B4D3V9     | cDNA FLJ51518, highly similar to Thioesteron, mitochondrial                                            | NA           | 2.33         | -0.03709                | -0.47261 | -0.0714  |          | 12.18 | NA    | NA                     | 34.74 | 0.34  | 0.49       |                    | 0.43727                     | -0.40399 | -1.27281 |          | 40.10 | NA    | NA    | 67.12                  | -0.41 | 0.11 |            |                    |                             |
| F4ZV62     | NF45                                                                                                   | NA           | 3.33         | -0.45586                | -0.25652 | 1.08234  |          | 8.78  | NA    | NA                     | 64.70 | 0.13  | 0.70       |                    | 0.065121                    | 0.326021 | 1.29295  |          | 12.75 | NA    | NA    | 51.13                  | 0.56  | 0.40 |            |                    |                             |
| Q6I8A0     | NADH dehydrogenase (Ubiquinone) Fe-S protein 5, 15kDa (NADH-coenzyme Q reductase)                      | NDUFS5       | 2.00         | -0.32814                | -0.06881 | -1.77052 |          | 12.68 | NA    | NA                     | 70.45 | -0.72 | 0.43       |                    | -1.43979                    | -0.22824 | -1.18413 |          | 56.12 | NA    | NA    | 23.01                  | -0.95 | 0.11 |            |                    |                             |
| Q9H3K5     | Myo17 protein                                                                                          | NA           | 2.67         | -0.23833                | 0.294331 | -0.17659 |          | 37.11 | NA    | NA                     | 11.20 | -0.04 | 0.60       |                    | -0.43979                    | 0.258178 | -0.53596 |          | 33.56 | NA    | NA    | 23.64                  | -0.24 | 0.39 |            |                    |                             |
| D3DQ84     | Acyl-CoA synthetase long-chain family member 6, isoform CRA_e                                          | ACSL6        | 4.33         | -0.47417                | 0.301126 | -1.00647 |          | 25.81 | NA    | NA                     | 45.89 | -0.39 | 0.15       |                    | 0.399229                    | 0.105766 | -0.61724 |          | 14.33 | NA    | NA    | 41.72                  | -0.04 | 0.75 |            |                    |                             |
| P61604     | 10 kDa heat shock protein, mitochondrial                                                               | HSPE1        | 7.33         | 0.52446                 | 0.484206 | 0.901593 |          | 1.97  | NA    | NA                     | 19.34 | 0.64  | 0.18       |                    | 0.917834                    | 0.766584 | 0.606649 |          | 7.41  | NA    | NA    | 11.62                  | 0.76  | 0.10 |            |                    |                             |
| P62195     | 26S protease regulatory subunit 8                                                                      | PSMCS5       | 2.33         | 0.38445                 | -0.12236 | -0.22928 |          | 24.59 | NA    | NA                     | 18.64 | 0.01  | 0.83       |                    | 0.535932                    | -0.08136 | 0.062322 |          | 29.80 | NA    | NA    | 9.68                   | 0.17  | 0.33 |            |                    |                             |
| C53GE3     | Pyruvate dehydrogenase E1 component subunit alpha (Fragment)                                           | NA           | 4.00         | -0.56008                | -0.19438 | -0.48441 |          | 17.83 | NA    | NA                     | 5.82  | -0.41 | 0.08       |                    | -0.45864                    | -0.38142 | -0.83359 |          | 7.92  | NA    | NA    | 20.16                  | -0.56 | 0.20 |            |                    |                             |
| C53HB7     | Diablo isoform 1 variant (Fragment)                                                                    | NA           | 2.33         | 0.933739                | 0.3807   | 0.690789 |          | 26.78 | NA    | NA                     | 0.35  | 0.67  | 0.02       |                    | 1.015474                    | 0.853788 | 0.596291 |          | 3.78  | NA    | NA    | 16.62                  | 0.82  | 0.14 |            |                    |                             |
| C512C3     | Signal recognition particle 14 kDa protein                                                             | SRP14        | 2.00         | -0.43664                | 0.373831 | -1.10952 |          | 2.00  | NA    | NA                     | 59.00 | -0.39 | 0.59       |                    | -0.13834                    | 0.66948  | -0.3819  |          | 38.59 | NA    | NA    | 95.34                  | -0.41 | 0.19 |            |                    |                             |
| P36405     | ADP-ribosylation factor-like protein 3                                                                 | ARL3         | 2.67         | 0.166224                | -0.13585 |          | 14.75    | NA    | NA    | 20.79                  | -0.12 | 0.52  |            | 0.71589            | -0.23238                    |          | -0.36617 |          | 44.68 | NA    | NA    | 32.80                  | 0.04  |      |            |                    |                             |

| UniProt    | Protein name                                                                                 | Gene name | Peptide mean | 08/017 hESC-RPE to hRPE |     |     |     |     |         |                        |          |          |            |                    | 08/023 hESC-RPE to hRPE     |          |       |          |      |          |          |                        |           |           |            |                    |                             |       |       |       |      |      |
|------------|----------------------------------------------------------------------------------------------|-----------|--------------|-------------------------|-----|-----|-----|-----|---------|------------------------|----------|----------|------------|--------------------|-----------------------------|----------|-------|----------|------|----------|----------|------------------------|-----------|-----------|------------|--------------------|-----------------------------|-------|-------|-------|------|------|
|            |                                                                                              |           |              | Analysis                |     |     |     |     |         | Technical replicate CV |          |          | Biological | Fold change (mean) | Unadjusted p-value (t-test) | Analysis |       |          |      |          |          | Technical replicate CV |           |           | Biological | Fold change (mean) | Unadjusted p-value (t-test) |       |       |       |      |      |
|            |                                                                                              |           |              | 1.1                     | 1.2 | 2.1 | 2.2 | 3.1 | 3.2     | 1                      | 2        | 3        | CV         |                    |                             | NA       | 1.1   | 1.2      | 2.1  | 2.2      | 3.1      | 3.2                    | 1         | 2         | 3          |                    |                             | CV    | NA    |       |      |      |
| E9KL35     | Epididymis tissue sperm binding protein LU 3a                                                | NA        | 4.33         | 1.141453                |     |     |     |     |         | 0.546454               | 0.681884 | NA       | NA         | 6.63               | 25.48                       | 0.79     | 0.19  | 0.858646 |      | 0.393686 | 0.832174 | NA                     | NA        | 21.33     | 11.21      | 0.69               | 0.11                        |       |       |       |      |      |
| O53HM8     | Annexin (Fragment)                                                                           | NA        | 2.33         | 0.667031                |     |     |     |     |         | -0.5293                | 0.156674 | NA       | NA         | 33.00              | 38.82                       | 0.10     | 0.67  | -0.48815 |      | -0.30717 | 0.171863 | NA                     | NA        | 23.27     | 21.41      | -0.21              | 0.41                        |       |       |       |      |      |
| O59F6      | Calpain 2, large [catalytic] subunit variant (Fragment)                                      | NA        | 1.67         | -0.16919                |     |     |     |     |         | -1.04551               | 0.789151 | NA       | NA         | 79.49              | 15.37                       | -0.14    | 0.09  | -0.16585 |      | -0.4732  | 0.032077 | NA                     | NA        | 8.51      | 1.60       | -0.20              | 0.09                        |       |       |       |      |      |
| ON8169     | Amino acid transporter                                                                       | SLC1A3    | 3.33         | -1.35357                |     |     |     |     |         | -2.00792               | -1.41957 | NA       | NA         | 28.44              | 16.12                       | -1.59    | 0.07  | -1.6527  |      | -2.50395 | -2.32375 | NA                     | NA        | 24.82     | 36.34      | -2.16              | 0.12                        |       |       |       |      |      |
| O9N826     | cDNA FLJ13237 fs. clone KIDNE2004846, highly similar to 26S PROTEASOME REGULATORY SUBUNIT 53 | NA        | 1.33         | 0.759466                |     |     |     |     |         | 0.168861               | -2.24729 | NA       | NA         | 96.79              | 61.44                       | -0.44    | 0.90  | 0.512929 |      | 0.428979 | -0.78932 | NA                     | NA        | 56.40     | 17.49      | 0.05               | 0.72                        |       |       |       |      |      |
| D68BV2     | Vesicular integral-membrane protein VIP36                                                    | LMAN2     | 1.67         |                         |     |     |     |     |         | 0.899121               | 1.020976 | NA       | NA         | 5.97               | 18.01                       | 0.84     | 0.15  | 0.376116 |      | 0.727589 | 0.622612 | NA                     | NA        | 54.10     | 24.65      | 0.58               | 0.18                        |       |       |       |      |      |
| P16403     | Histone H1.2                                                                                 | HIST1H1C  | 14.67        |                         |     |     |     |     |         | -1.89178               | -0.49692 | -0.72493 | NA         | 11.15              | NA                          | 59.14    | -0.14 | 0.30     |      |          | -1.87249 | -0.87106               | -0.82909  | NA        | NA         | 48.12              | 12.30                       | -1.19 | 0.19  |       |      |      |
| P23348     | NAD-dependent malic enzyme, mitochondrial                                                    | ME2       | 3.67         |                         |     |     |     |     |         | 0.572379               | -0.3583  | -0.72536 | NA         | 17.89              | NA                          | 17.89    | -0.17 | 0.98     |      |          | 0.961365 | -0.16043               | -0.54293  | NA        | NA         | 8.64               | NA                          | 59.75 | 0.72  |       |      |      |
| O9Y230     | RuvB-like 2                                                                                  | RUVBL2    | 2.33         |                         |     |     |     |     |         | 0.890191               | 1.024833 | -0.45184 | NA         | 66.66              | NA                          | 20.56    | 0.40  | 0.76     |      |          | 0.987496 | 0.807102               | -0.2272   | NA        | NA         | 2.06               | 29.31                       | 0.52  | 0.32  |       |      |      |
| O9Y3D6     | Mitochondrial fission 1 protein                                                              | FIS1      | 2.00         |                         |     |     |     |     |         | -0.02373               | -0.63293 | -1.90425 | NA         | 58.57              | NA                          | 51.83    | -0.85 | 0.40     |      |          | 0.099609 | -2.42443               | -1.48457  | NA        | NA         | 44.50              | NA                          | 84.19 | -1.27 | 0.53  |      |      |
| A8K132     | cDNA FLJ75476, highly similar to Homo sapiens glutaminase (GLS), mRNA                        | GLS       | 5.33         |                         |     |     |     |     |         | 0.445838               | -1.11155 | -2.00647 | NA         | 42.51              | NA                          | 82.84    | -0.89 | 0.68     |      |          | 0.805307 | -0.56149               | -1.16929  | NA        | NA         | 29.36              | NA                          | 72.68 | -0.31 | 0.98  |      |      |
| B4DH4C6    | Amino acid transporter                                                                       | NA        | 5.33         |                         |     |     |     |     |         | -1.84876               | -1.42292 | -0.59183 | NA         | 39.64              | NA                          | 42.75    | -1.29 | 0.18     |      |          | -1.98139 | -1.69728               | -1.18413  | NA        | NA         | 24.89              | NA                          | 27.27 | -1.62 | 0.10  |      |      |
| B4DWN1     | cDNA FLJ52285, highly similar to Vesicular integral-membrane protein VIP36                   | NA        | 2.00         |                         |     |     |     |     |         | 0.926499               | 0.723277 | 2.92187  | NA         | 90.83              | NA                          | 58.91    | -1.52 | 0.20     |      |          | 0.259836 | 1.023967               | 2.715521  | NA        | NA         | 74.56              | NA                          | 79.83 | 1.33  | 0.41  |      |      |
| B7Z4Z4     | cDNA FLJ51918, highly similar to Peroxisomal membrane protein PEX14                          | NA        | 3.67         |                         |     |     |     |     |         | -0.1267                | -1.67125 | -1.28805 | NA         | 18.67              | NA                          | 61.34    | -1.03 | 0.45     |      |          | -0.07787 | -1.4876                | -1.20259  | NA        | NA         | 13.92              | NA                          | 58.12 | -0.92 | 0.46  |      |      |
| B7Z8B3     | cDNA, FLJ79447, highly similar to Nucleosome assembly protein 1-like 4                       | NA        | 2.00         |                         |     |     |     |     |         | 0.65499                | -0.56548 | -0.23094 | NA         | 16.32              | NA                          | 49.03    | -0.05 | 0.85     |      |          | 0.403533 | 0.110075               | -0.817464 | NA        | NA         | 46.47              | NA                          | 33.81 | -1.02 | 0.98  |      |      |
| C9JKZ2     | NADH dehydrogenase [ubiquinone] 1 beta subcomplex subunit 3 (Fragment)                       | NDUFB3    | 1.00         |                         |     |     |     |     |         | -0.86976               | -0.78448 | -0.52392 | NA         | 12.74              | NA                          | 10.83    | -0.73 | 0.09     |      |          | -1.15404 | -0.71919               | -0.62112  | NA        | NA         | 4.80               | NA                          | 23.54 | -0.83 | 0.17  |      |      |
| HY986      | NADH dehydrogenase [ubiquinone] 1 beta subcomplex subunit 5, mitochondrial (Fragment)        | NDUFBS    | 1.00         |                         |     |     |     |     |         | 0.053477               | -1.70975 | -1.73762 | NA         | 13.87              | NA                          | 77.54    | -1.13 | 0.52     |      |          | -0.21207 | -1.16767               | -1.07218  | NA        | NA         | 5.09               | NA                          | 43.23 | -0.82 | 0.38  |      |      |
| JKPE3      | Guanine nucleotide-binding protein beta-2-like 1                                             | GNB2L1    | 3.33         |                         |     |     |     |     |         | 0.760949               | 1.589461 | 0.449878 | NA         | 53.12              | NA                          | 17.96    | 0.93  | 0.20     |      |          | 0.561488 | 0.911556               | 0.493193  | NA        | NA         | 20.36              | NA                          | 7.64  | 0.66  | 0.07  |      |      |
| O9UQD4     | SH3-containing Grb-2-like 1 protein                                                          | NA        | 1.33         |                         |     |     |     |     |         | 0.108921               | 1.158245 | 0.873047 | NA         | 13.93              | NA                          | 43.35    | -0.73 | 0.40     |      |          | 0.28284  | 1.587407               | 0.80436   | NA        | NA         | 37.46              | NA                          | 45.63 | -0.89 | 0.35  |      |      |
| O15257     | Serine/threonine-protein phosphatase 2A activator                                            | PPP2R4    | 2.00         |                         |     |     |     |     |         | -1.6915                | -0.8196  | -0.87543 | NA         | 2.74               | NA                          | 40.24    | -1.11 | 0.23     |      |          | -1.00243 | -0.94611               | -1.17669  | NA        | NA         | 11.28              | NA                          | 2.66  | -1.04 | 0.02  |      |      |
| O9H936     | Mitochondrial glutamate carrier 1                                                            | SLC25A22  | 3.00         |                         |     |     |     |     |         | -1.9095                | -0.31446 | -0.58883 | NA         | 11.95              | NA                          | 66.71    | -0.93 | 0.36     |      |          | -1.69078 | -1.14105               | -0.60453  | NA        | NA         | 26.00              | NA                          | 40.17 | -1.15 | 0.20  |      |      |
| AAO087VV22 | 60S ribosomal protein L10                                                                    | RPL10     | 1.33         |                         |     |     |     |     |         | 0.427324               | 0.96621  | 0.672463 | NA         | 14.35              | NA                          | 19.46    | 0.69  | 0.19     |      |          | 0.121043 | 0.170016               | 0.522827  | NA        | NA         | 26.50              | NA                          | 33.71 | -0.57 | 0.40  |      |      |
| F8W0J6     | Nucleosome assembly protein 1-like 1                                                         | NAP1L1    | 1.33         |                         |     |     |     |     |         | -1.09453               | -0.17029 | 0.650127 | NA         | 39.16              | NA                          | 63.38    | -0.20 | 0.64     |      |          | -0.6432  | -0.91095               | -0.80597  | NA        | NA         | 5.14               | NA                          | 10.48 | -0.79 | 0.09  |      |      |
| CZQ9B7     | Glucose-6-phosphate 1-dehydrogenase (Fragment)                                               | G6PD      | 2.33         |                         |     |     |     |     |         | -0.26722               | -0.16969 | 0.004348 | NA         | 8.52               | NA                          | 9.16     | -0.14 | 0.31     |      |          | 0.093426 | -0.19391               | -0.41327  | NA        | NA         | 10.73              | NA                          | 19.14 | -0.17 | 0.69  |      |      |
| F8W9I8     | Serpin-B                                                                                     | SEPT8     | 2.00         |                         |     |     |     |     | -0.2677 | -0.01738               | 0.406197 | -0.2677  | NA         | NA                 | NA                          | 22.42    | 0.06  | 0.77     |      |          | 0.010976 | 0.584709               |           | -0.98477  | NA         | NA                 | NA                          | NA    | 49.51 | -0.13 | 0.80 |      |
| B3K9V6     | cDNA FLJ16285 fs. clone OCBF2004038, highly similar to Dihydropyrimidinase-related protein 1 | NA        | 1.00         |                         |     |     |     |     |         | -1.24613               |          | -1.33118 | -1.71805   | NA                 | NA                          | NA       | 16.60 | -1.43    | 0.01 |          |          | -1.67591               |           | -1.19333  | -1.2876    | NA                 | NA                          | 16.88 | -1.39 | 0.01  |      |      |
| O4LE36     | ACYL variant protein (Fragment)                                                              | ACYL      | 1.00         |                         |     |     |     |     |         | 0.045406               | 0.434159 | 0.021713 | NA         | NA                 | NA                          | 16.71    | 0.17  | 0.34     |      |          | -0.05732 | 0.248366               | -0.00663  | NA        | NA         | NA                 | NA                          | 11.66 | 0.66  | 0.58  |      |      |
| O6FH8T     | RNP24 protein                                                                                | RNP24     | 2.33         |                         |     |     |     |     |         | 0.003981               | -1.44142 | -0.38504 | NA         | NA                 | NA                          | 45.02    | -0.61 | 0.29     |      |          | 0.410016 | -2.77714               | -1.0244   | NA        | NA         | NA                 | NA                          | 92.80 | -1.13 | 0.34  |      |      |
| V9HW06     | Serine hydroxymethyltransferase                                                              | SHMT2     | 1.33         |                         |     |     |     |     |         | -1.79573               | 0.26106  | -0.7931  | NA         | NA                 | NA                          | 67.63    | -0.78 | 0.32     |      |          | -2.40282 | 0.276347               | -0.73531  | NA        | NA         | NA                 | NA                          | 77.10 | -0.95 | 0.35  |      |      |
| F5GZN3     | Lactadherin                                                                                  | MFG8      | 2.00         |                         |     |     |     |     |         | 0.526464               | 0.840144 |          | NA         | NA                 | NA                          | 45.50    | -0.24 | 0.64     |      |          | 0.934752 | 0.925694               |           | 0.21271   | NA         | NA                 | NA                          | NA    | 26.03 | -0.69 | 0.10 |      |
| O9QVQ6     | Histone H2A type 1-A                                                                         | HIST1H2AA | 7.67         |                         |     |     |     |     |         | -3.50592               |          | -1.32235 | -1.34085   | NA                 | NA                          | 0.91     | 90.12 | -2.06    | 0.27 |          |          | -2.9504                |           | -2.06449  | -2.05732   | NA                 | NA                          | 0.35  | 42.27 | -2.36 | 0.11 |      |
| F4ZV64     | NF90a                                                                                        | NA        | 7.00         |                         |     |     |     |     |         | 0.706501               |          | -0.39236 | 0.236337   | NA                 | NA                          | 30.34    | 35.98 | 0.18     | 0.57 |          |          | 0.700185               |           | -0.03538  | 0.270118   | NA                 | NA                          | 14.92 | 27.80 | 0.31  | 0.39 |      |
| HY0BL1     | Inositol monophosphatase 1 (Fragment)                                                        | IMPAA1    | 1.33         |                         |     |     |     |     |         | -0.4115                |          | 0.540315 | -0.37471   | NA                 | NA                          | 43.40    | 27.37 | -0.08    | 0.63 |          |          | -0.65425               |           | 0.376267  | -0.55362   | NA                 | NA                          | 44.06 | 30.83 | -0.28 | 0.41 |      |
| O53C79     | Carnitine O-palmitoyltransferase II, mitochondrial variant (Fragment)                        | NA        | 2.00         |                         |     |     |     |     |         | -0.44341               |          | -0.4619  | -0.41673   | NA                 | NA                          | 2.21     | 0.21  | -0.44    | 0.00 |          |          | -1.39122               |           | -0.414669 | -0.81245   | NA                 | NA                          | 19.37 | 31.84 | -0.07 | 0.84 |      |
| O6JA22     | RPL21 protein                                                                                | RPL21     | 1.00         |                         |     |     |     |     |         | -0.40847               |          | 1.165691 | 0.464972   | NA                 | NA                          | 33.59    | 58.30 | 0.41     | 0.80 |          |          | 0.605167               |           | 0.691809  | -0.191599  | NA                 | NA                          | 42.26 | 14.19 | 0.37  | 0.25 |      |
| P08727     | KRT19, type I cytoskeletal 19                                                                | KRT19     | 7.67         |                         |     |     |     |     |         | 0.744948               | 0.760374 | 0.87501  | NA         | 0.76               | NA                          | 5.99     | 0.79  | 0.05     |      |          | 1.754672 | 1.446921               | 1.08121   | NA        | NA         | 15.03              | NA                          | 25.58 | 1.43  | 0.12  |      |      |
| O70J99     | Protein unc-13 homolog D                                                                     | UNC13D    | 3.33         |                         |     |     |     |     |         | 1.224058               | 0.248022 | 0.496201 | NA         | 46.09              | NA                          | 15.66    | 0.66  | 0.12     |      |          | 0.71668  | 0.052531               | -0.23312  | NA        | NA         | 31.99              | NA                          | 31.59 | 0.18  | 0.85  |      |      |
| O9UJZ1     | Stomatin-like protein 2, mitochondrial                                                       | STOML2    | 5.33         |                         |     |     |     |     |         | -0.22098               | -0.06318 | 0.549418 | NA         | 7.73               | NA                          | 33.16    | 0.09  | 0.66     |      |          | -0.37502 | -0.83764               | 0.726465  | NA        | NA         | 22.48              | NA                          | 60.30 | -0.16 | 0.94  |      |      |
| AAO024R994 | Copine III, isoform CRA_a                                                                    | CNP3C     | 2.00         |                         |     |     |     |     |         | -0.46804               | -0.29063 | -0.66722 | NA         | 8.68               | NA                          | 14.20    | -0.48 | 0.17     |      |          | -0.66522 | -0.8417                | -1.011    | NA        | NA         | 8.64               | NA                          | 12.72 | -0.84 | 0.09  |      |      |
| B4DN60     | cDNA FLJ52703, highly similar to Asparaginyl-tRNA synthetase, cytoplasmic (EC6.1.1.22)       | NA        | 2.33         |                         |     |     |     |     |         | 0.092645               | -0.05521 | 0.135272 | NA         | 7.24               | NA                          | 5.62     | 0.06  | 0.41     |      |          | 0.440746 | -0.24922               | 0.748786  | NA        | NA         | 33.19              | NA                          | 29.56 | 0.31  | 0.42  |      |      |
| O53E34     | Dolichyl-diphosphooligosaccharide-protein glycosyltransferase subunit 1 (Fragment)           | NA        | 11.33        |                         |     |     |     |     |         | 0.147517               | 0.727673 | 0.062175 | NA         | 1.33               | NA                          | 7.31     | 0.16  | 0.32     |      |          | 0.042883 | 0.250064               | -0.0031   | NA        | NA         | 10.14              | NA                          | 7.51  | 0.10  | 0.51  |      |      |
| O8NAB7     | cDNA FLJ5635 fs. clone SPLEN2011805, highly similar to BONE/CARTILAGE PROTEOGLYCAN I         | NA        | 1.00         |                         |     |     |     |     |         | 1.466996               | 1.495283 | 0.3524   | NA         | 6.19               | NA                          | 52.66    | 1.10  | 0.35     |      |          | 2.094576 | 1.975248               | 0.990457  | NA        | NA         | 5.85               | NA                          | 49.12 | 1.69  | 0.21  |      |      |
| V9HW07     | Epithelial secretory protein LU 52                                                           | ESPT1     | 7.00         |                         |     |     |     |     |         | 0.05021                | -0.08021 | 0.08021  | NA         | NA                 | NA                          | 32.56    | 0.06  | 0.21     |      |          | 0.035046 | 0.03215                | 0.781995  | NA        | NA         | 3.27               | NA                          | 37.25 | 0.26  | 0.20  |      |      |
| O60888     | Protein CUTA                                                                                 | CUTA      | 1.67         |                         |     |     |     |     |         | 0.24441                | 0.311853 | 0.802084 | NA         | 15.26              | NA                          | 15.89    | 0.58  | 0.16     |      |          | 0.839899 | 1.071867               | 0.990457  | NA        | NA         | 11.34              | NA                          | 1.46  | 0.97  | 0.01  |      |      |
| P68032     | Actin, alpha cardiac muscle 1                                                                | ACT1      | 27.33        |                         |     |     |     |     |         | -0.39931               | -0.05084 |          | 0.360638   | NA                 | 17.00                       | NA       | 27.83 | -0.03    | 0.86 |          |          | 0.0495                 | 0.216577  |           | 0.649476   | NA                 | NA                          | 8.18  | NA    | 24.93 | 0.31 | 0.37 |
| B4DDL4     | cDNA FLJ53966, moderately similar to Homo sapiens cytidylate kinase (CMPK), mRNA             | NA        | 1.67         |                         |     |     |     |     |         | 0.263344               | 1.799296 | 1.14029  | NA         | 68.89              | NA                          | 4.24     | 1.07  | 0.03     |      |          | 1.154178 | 1.73449                | 1.484754  | NA        | NA         | 28.07              | NA                          | 0.56  | 1.46  | 0.10  |      |      |
| O4LE63     | ATP2B2 variant protein (Fragment)                                                            |           |              |                         |     |     |     |     |         |                        |          |          |            |                    |                             |          |       |          |      |          |          |                        |           |           |            |                    |                             |       |       |       |      |      |

| UniProt    | Protein name                                                                                                        | Gene name     | Peptide mean | 08/017 hESC-RPE to hRPE |          |          |     |          |     |                        |    |       |            | 08/023 hESC-RPE to hRPE |                             |          |     |     |     |          |     |                        |    |       |            |                    |                             |
|------------|---------------------------------------------------------------------------------------------------------------------|---------------|--------------|-------------------------|----------|----------|-----|----------|-----|------------------------|----|-------|------------|-------------------------|-----------------------------|----------|-----|-----|-----|----------|-----|------------------------|----|-------|------------|--------------------|-----------------------------|
|            |                                                                                                                     |               |              | Analysis                |          |          |     |          |     | Technical replicate CV |    |       | Biological | Fold change (mean)      | Unadjusted p-value (t-test) | Analysis |     |     |     |          |     | Technical replicate CV |    |       | Biological | Fold change (mean) | Unadjusted p-value (t-test) |
|            |                                                                                                                     |               |              | 1.1                     | 1.2      | 2.1      | 2.2 | 3.1      | 3.2 | 1                      | 2  | 3     | CV         |                         |                             | 1.1      | 1.2 | 2.1 | 2.2 | 3.1      | 3.2 | 1                      | 2  | 3     | CV         |                    |                             |
| Q4WB24     | Histone cluster 1, H1e                                                                                              | HIST1H1E      | 16.00        | -1.5096                 |          |          |     | -0.39254 | NA  | NA                     | NA | 52.17 | -0.95      | 0.34                    | -1.75475                    |          |     |     |     | -1.49227 | NA  | NA                     | NA | 12.83 | -1.62      | 0.05               |                             |
| O53HR2     | Acyl-Coenzyme A dehydrogenase, very long chain variant (Fragment)                                                   | NA            | 9.00         | 0.440355                |          |          |     | 0.135272 | NA  | NA                     | NA | 14.90 | 0.29       | 0.31                    | 0.178663                    |          |     |     |     | 0.000827 | NA  | NA                     | NA | 8.71  | 0.09       | 0.50               |                             |
| C59EK7     | CSDF038Y005 variant (Fragment)                                                                                      | NA            | 2.00         | -0.69029                |          |          |     | 0.310293 | NA  | NA                     | NA | 47.17 | -0.19      | 0.77                    | -0.78653                    |          |     |     |     | -0.0358  | NA  | NA                     | NA | 35.99 | -0.41      | 0.47               |                             |
| V5YQL4     | Adenosylhomocysteinease                                                                                             | FGFR2-AHCY1   | 3.00         | 0.019163                |          |          |     | 0.250093 | NA  | NA                     | NA | 11.29 | 0.13       | 0.45                    | 0.509393                    |          |     |     |     | 0.357023 | NA  | NA                     | NA | 7.46  | 0.43       | 0.11               |                             |
| B3KT66     | Proteasome (Prosome, macropain) 26S subunit, non-ATPase, 6, isoform CRA_c                                           | PSMD6         | 1.50         | 0.132861                |          |          |     | 0.100491 | NA  | NA                     | NA | 1.59  | 0.12       | 0.09                    | -0.31488                    |          |     |     |     | 0.284856 | NA  | NA                     | NA | 28.98 | -0.02      | 0.97               |                             |
| AA024R877  | Delta-aminolevulinic acid dehydratase                                                                               | ALAD          | 2.00         | 0.071055                |          |          |     | 0.511419 | NA  | NA                     | NA | 21.42 | 0.29       | 0.41                    | -0.10049                    |          |     |     |     | -0.03741 | NA  | NA                     | NA | 3.09  | -0.07      | 0.27               |                             |
| AA024RAC3  | Viral simian leukemia viral oncogene homolog B (Ras related GTP binding protein), isoform CRA_a                     | VRAL          | 2.50         | -0.34805                |          |          |     | 0.03021  | NA  | NA                     | NA | 18.43 | -0.16      | 0.56                    | -0.79107                    |          |     |     |     | -0.01951 | NA  | NA                     | NA | 36.94 | -0.41      | 0.48               |                             |
| AA024RCN6  | Vahyl-RNA synthetase, isoform CRA_a                                                                                 | VARS          | 2.00         | 1.07489                 |          |          |     | -0.33660 | NA  | NA                     | NA | 64.12 | 0.37       | 0.69                    | 1.236441                    |          |     |     |     | 0.444958 | NA  | NA                     | NA | 36.94 | 0.85       | 0.27               |                             |
| BAE043     | KH domain containing, RNA binding, signal transduction associated 1, isoform CRA_b                                  | KHDRBS1       | 1.50         | 0.149107                |          |          |     | -0.41994 | NA  | NA                     | NA | 27.53 | -0.14      | 0.72                    | -0.02564                    |          |     |     |     | -0.54017 | NA  | NA                     | NA | 24.95 | -0.28      | 0.47               |                             |
| E7EK90     | Dynactin subunit 1                                                                                                  | DCTN1         | 2.00         | 0.301908                |          |          |     | -0.27746 | NA  | NA                     | NA | 28.02 | 0.01       | 0.97                    | 0.226831                    |          |     |     |     | 0.062738 | NA  | NA                     | NA | 8.03  | 0.14       | 0.33               |                             |
| J3KMX5     | 40S ribosomal protein S13                                                                                           | RPS13         | 2.00         | -0.1213                 |          |          |     | 0.992278 | NA  | NA                     | NA | 52.02 | 0.44       | 0.58                    | -0.89399                    |          |     |     |     | 0.893735 | NA  | NA                     | NA | 77.90 | 0.00       | 1.00               |                             |
| Q6FHM9     | CD59 antigen, complement regulatory protein, isoform CRA_b                                                          | CD59          | 2.00         | 0.87849                 |          |          |     | 0.16464  | NA  | NA                     | NA | 34.29 | 0.52       | 0.38                    | 0.68866                     |          |     |     |     | 0.942564 | NA  | NA                     | NA | 12.41 | 0.82       | 0.10               |                             |
| OBIZ09     | SH3GL2 protein                                                                                                      | SH3GL2        | 1.00         | 0.359044                |          |          |     | -0.4869  | NA  | NA                     | NA | 40.31 | -0.06      | 0.90                    | 0.484393                    |          |     |     |     | -0.95024 | NA  | NA                     | NA | 28.02 | 0.19       | 0.62               |                             |
| O96B54     | FBL protein (Fragment)                                                                                              | FBL           | 1.00         | 1.378784                |          |          |     | 1.471612 | NA  | NA                     | NA | 4.55  | 1.43       | 0.02                    | 1.321051                    |          |     |     |     | 1.088036 | NA  | NA                     | NA | 11.40 | 1.20       | 0.06               |                             |
| O60518     | Ran-binding protein 6                                                                                               | RANBP6        | 2.00         |                         | 0.8584   | 0.595263 |     |          | NA  | NA                     | NA | 12.86 | 0.73       | 0.11                    | 0.855981                    |          |     |     |     | -0.62447 | NA  | NA                     | NA | 66.80 | 0.12       | 0.90               |                             |
| C9AHE7     | ER01-like protein alpha                                                                                             | ER01L         | 1.00         | 0.594926                | 0.02366  |          |     |          | NA  | NA                     | NA | 27.64 | 0.31       | 0.47                    | 0.948177                    |          |     |     |     | 0.53859  | NA  | NA                     | NA | 19.94 | 0.74       | 0.17               |                             |
| C9AIZ4     | DnaJ homolog subfamily C member 5                                                                                   | DNAJC5        | 2.00         | -0.84876                | -0.51196 |          |     |          | NA  | NA                     | NA | 16.43 | -0.68      | 0.15                    | -1.06237                    |          |     |     |     | -0.48548 | NA  | NA                     | NA | 27.90 | -0.77      | 0.23               |                             |
| C9NVL2     | UDP-glucose:glycoprotein glucosyltransferase 1                                                                      | UGGT1         | 1.00         | 0.796139                | 1.171163 |          |     |          | NA  | NA                     | NA | 43.67 | 1.26       | 0.22                    | 0.602847                    |          |     |     |     | 1.329349 | NA  | NA                     | NA | 34.87 | 0.97       | 0.23               |                             |
| AA024R317  | HCG2032701, isoform CRA_a                                                                                           | hCG_2032701   | 1.50         | 0.881871                | 0.482926 |          |     |          | NA  | NA                     | NA | 19.43 | 0.68       | 0.18                    | -0.10155                    |          |     |     |     | -0.06708 | NA  | NA                     | NA | 1.69  | -0.08      | 0.13               |                             |
| AA0A07WX97 | Bcl-2-like protein 13                                                                                               | BCL2L13       | 4.00         | 0.483935                | 0.433342 |          |     |          | NA  | NA                     | NA | 2.48  | 0.46       | 0.04                    | 0.464371                    |          |     |     |     | 0.544328 | NA  | NA                     | NA | 3.92  | 0.50       | 0.05               |                             |
| AA0A07X1F5 | Protein SYNJ2BP-COX16 (Fragment)                                                                                    | SYNJ2BP-COX16 | 1.00         | 0.26066                 | -0.5379  |          |     |          | NA  | NA                     | NA | 38.17 | -0.14      | 0.79                    | -0.19305                    |          |     |     |     | -0.80325 | NA  | NA                     | NA | 29.47 | -0.50      | 0.35               |                             |
| A8K9V9     | cDNA FLJ76064                                                                                                       | NA            | 1.50         | -0.54499                | -0.53252 |          |     |          | NA  | NA                     | NA | 0.61  | -0.54      | 0.01                    | -0.16957                    |          |     |     |     | -1.37897 | NA  | NA                     | NA | 56.03 | -0.77      | 0.42               |                             |
| B2RCC2     | cDNA, FLJ95978, highly similar to Homo sapiens Y box binding protein 2 (YBX2), mRNA                                 | NA            | 1.00         | 0.1657                  | 0.767389 |          |     |          | NA  | NA                     | NA | 29.07 | 0.47       | 0.36                    | 0.371017                    |          |     |     |     | 0.618727 | NA  | NA                     | NA | 12.11 | 0.49       | 0.16               |                             |
| B4D2H2     | cDNA FLJ60563, highly similar to Homoglycine-induceddifferentiation-associated protein 1                            | NA            | 2.50         | 1.020264                | -0.13174 |          |     |          | NA  | NA                     | NA | 53.64 | 0.44       | 0.58                    | 1.225663                    |          |     |     |     | -0.2761  | NA  | NA                     | NA | 67.61 | 0.47       | 0.64               |                             |
| B7Z8A2     | cDNA FLJ51671, highly similar to Prenylcysteine oxidase (EC 1.8.3.5)                                                | NA            | 1.50         | -1.27661                | -1.01572 |          |     |          | NA  | NA                     | NA | 12.75 | -1.15      | 0.07                    | -1.40224                    |          |     |     |     | -1.1156  | NA  | NA                     | NA | 14.00 | -1.26      | 0.07               |                             |
| FG5KX5     | Dolichyl diphosphooligosaccharide--protein glycosyltransferase subunit DAD1                                         | DAD1          | 1.00         | 0.827605                | 0.276752 |          |     |          | NA  | NA                     | NA | 26.68 | 0.55       | 0.29                    | 0.970165                    |          |     |     |     | 0.24858  | NA  | NA                     | NA | 34.65 | 0.61       | 0.34               |                             |
| F6T1Q0     | 2',5'-phosphodiesterase 12                                                                                          | PDE12         | 1.50         | 1.319724                | 0.591574 |          |     |          | NA  | NA                     | NA | 34.95 | 0.96       | 0.23                    | 1.073984                    |          |     |     |     | 0.810425 | NA  | NA                     | NA | 12.88 | 0.94       | 0.09               |                             |
| F8W7Q4     | Protein FAM162A                                                                                                     | FAM162A       | 1.50         | 0.094236                | -0.76723 |          |     |          | NA  | NA                     | NA | 41.01 | -0.34      | 0.58                    | -0.32623                    |          |     |     |     | -0.74314 | NA  | NA                     | NA | 20.29 | -0.53      | 0.24               |                             |
| Q08A9      | Histone H2A                                                                                                         | HIST1H2AB     | 6.50         | -0.55723                | 0.043084 |          |     |          | NA  | NA                     | NA | 29.01 | -0.26      | 0.55                    | -0.77387                    |          |     |     |     | 0.570977 | NA  | NA                     | NA | 61.52 | -0.10      | 0.90               |                             |
| Q3MHU6     | NDUFB1 protein (Fragment)                                                                                           | NDUFB1        | 1.00         | -0.94927                | -1.80286 |          |     |          | NA  | NA                     | NA | 40.66 | -1.38      | 0.19                    | -1.09307                    |          |     |     |     | -0.53779 | NA  | NA                     | NA | 26.88 | -0.82      | 0.21               |                             |
| O53F10     | UV excision repair protein RAD23 homolog B variant (Fragment)                                                       | NA            | 2.50         | -0.57098                | -0.28962 |          |     |          | NA  | NA                     | NA | 13.75 | -0.40      | 0.20                    | -0.60482                    |          |     |     |     | 0.666543 | NA  | NA                     | NA | 58.57 | 0.03       | 0.97               |                             |
| O53GY0     | Plastin 3 variant (Fragment)                                                                                        | NA            | 2.00         | 1.724823                | 0.933138 |          |     |          | NA  | NA                     | NA | 37.86 | 1.33       | 0.18                    | 1.758466                    |          |     |     |     | 0.760659 | NA  | NA                     | NA | 47.04 | 1.26       | 0.24               |                             |
| O53YC7     | Serine--RNA ligase, cytoplasmic                                                                                     | SARS          | 4.00         | -0.15686                | 0.928272 |          |     |          | NA  | NA                     | NA | 50.81 | 0.39       | 0.61                    | 0.039987                    |          |     |     |     | 1.000253 | NA  | NA                     | NA | 45.04 | 0.52       | 0.47               |                             |
| O53129     | Quinine nucleotide binding protein (G protein), alpha transducing activity polypeptide 2                            | RAB27A        | 2.00         | -1.53899                | -0.68951 |          |     |          | NA  | NA                     | NA | 44.03 | -1.11      | 0.22                    | -2.08497                    |          |     |     |     | -0.81879 | NA  | NA                     | NA | 58.44 | -1.45      | 0.26               |                             |
| O6A88      | RAB27A protein                                                                                                      | RAB27A        | 2.50         | 0.204767                | 0.362953 |          |     |          | NA  | NA                     | NA | 7.75  | 0.28       | 0.17                    | 0.607917                    |          |     |     |     | 0.03225  | NA  | NA                     | NA | 30.88 | -0.29      | 0.53               |                             |
| O6MZZ3     | Putative uncharacterized protein DKFZp680I0746                                                                      | NA            | 2.50         | -1.06762                | -0.34141 |          |     |          | NA  | NA                     | NA | 34.86 | -0.70      | 0.30                    | -0.18953                    |          |     |     |     | -0.66162 | NA  | NA                     | NA | 22.93 | -0.43      | 0.32               |                             |
| OB8T01     | Similar to cytoskeleton-associated protein 4 (Fragment)                                                             | NA            | 14.50        | -0.04003                | -0.42328 |          |     |          | NA  | NA                     | NA | 18.67 | -0.23      | 0.44                    | 0.105561                    |          |     |     |     | 0.089055 | NA  | NA                     | NA | 0.81  | 0.10       | 0.05               |                             |
| P11233     | Ras-related protein Ral-A                                                                                           | RALA          | 2.00         | -0.16919                | -0.56195 |          |     |          | NA  | NA                     | NA | 19.13 | -0.37      | 0.31                    | -0.26273                    |          |     |     |     | -0.61088 | NA  | NA                     | NA | 16.98 | -0.44      | 0.24               |                             |
| Q9H3N1     | Thioredoxin-related transmembrane protein 1                                                                         | TMX1          | 1.50         | -0.99129                | -1.80934 |          |     |          | NA  | NA                     | NA | 39.05 | -1.40      | 0.18                    | -0.33955                    |          |     |     |     | -1.90335 | NA  | NA                     | NA | 69.93 | -1.12      | 0.39               |                             |
| AA0A07X2I2 | Glutathione peroxidase                                                                                              | GPX4          | 1.50         | 0.568416                | -0.3583  |          |     |          | NA  | NA                     | NA | 43.92 | 0.11       | 0.86                    | 0.819112                    |          |     |     |     | -0.00051 | NA  | NA                     | NA | 39.13 | 0.41       | 0.50               |                             |
| B4DHE8     | RNA-binding protein Musashi homolog 2                                                                               | MSI2          | 1.50         | -0.14758                | -0.06617 |          |     |          | NA  | NA                     | NA | 39.99 | -0.11      | 0.23                    | 0.455721                    |          |     |     |     | 0.42009  | NA  | NA                     | NA | 1.75  | 0.44       | 0.03               |                             |
| A8K2G0     | cDNA FLJ76605, highly similar to Homo sapiens secretory carrier membrane protein 1 (SCAMP1), transcript             | NA            | 1.50         | 0.477405                | -0.32853 |          |     |          | NA  | NA                     | NA | 3.50  | 0.07       | 0.88                    | 0.417294                    |          |     |     |     | 0.206989 | NA  | NA                     | NA | 10.29 | 0.31       | 0.21               |                             |
| A8K5V9     | cDNA FLJ76605, highly similar to Homo sapiens secretory carrier membrane protein 1 (SCAMP1), transcript             | NA            | 2.00         | 0.279017                | 0.53294  |          |     |          | NA  | NA                     | NA | 14.40 | 0.35       | 0.40                    | 1.849392                    |          |     |     |     | 0.151726 | NA  | NA                     | NA | 74.77 | 1.00       | 0.45               |                             |
| B4DHD2     | cDNA FLJ54588, highly similar to Programmed cell death 6-interacting protein                                        | NA            | 5.00         | 0.506559                | 0.59848  |          |     |          | NA  | NA                     | NA | 14.50 | 0.55       | 0.05                    | -0.23316                    |          |     |     |     | 0.339535 | NA  | NA                     | NA | 27.63 | 0.05       | 0.88               |                             |
| B4DHK9     | cDNA FLJ51656, highly similar to Actin-like protein 2                                                               | NA            | 1.00         | 1.047336                | 0.892775 |          |     |          | NA  | NA                     | NA | 7.57  | 0.97       | 0.05                    | 0.825343                    |          |     |     |     | 1.446643 | NA  | NA                     | NA | 29.99 | 1.14       | 0.17               |                             |
| B4DIV0     | cDNA FLJ52546, highly similar to Beta-soluble NSF attachment protein                                                | NA            | 3.00         | -0.46709                | -0.04077 |          |     |          | NA  | NA                     | NA | 20.74 | -0.25      | 0.44                    | -0.31358                    |          |     |     |     | -0.16081 | NA  | NA                     | NA | 7.48  | -0.24      | 0.20               |                             |
| B4DP80     | cDNA FLJ56357, highly similar to Homo sapiens secretory carrier membrane protein A1 binding protein (APOA1BP), mRNA | NA            | 1.50         | 0.478223                | -1.09099 |          |     |          | NA  | NA                     | NA | 70.13 | -0.31      | 0.76                    | 0.376459                    |          |     |     |     | 0.225022 | NA  | NA                     | NA | 7.42  | 0.30       | 0.16               |                             |
| E7EQ64     | Trypsin-1                                                                                                           | PRSS1         | 2.50         | 0.99791                 | 0.807679 |          |     |          | NA  | NA                     | NA | 9.31  | 0.90       | 0.07                    | 0.991934                    |          |     |     |     | 0.752727 | NA  | NA                     | NA | 11.70 | 0.87       | 0.09               |                             |
| J3KQAO     | Synaptotagmin I, isoform CRA_b                                                                                      | SYT1          | 1.50         | -1.09777                | -0.54261 |          |     |          | NA  | NA                     | NA | 26.88 | -0.82      | 0.21                    | -1.48865                    |          |     |     |     | -0.46423 | NA  | NA                     | NA | 48.20 | -0.98      | 0.31               |                             |
| O59GX9     | Ribosomal protein L5 variant (Fragment)                                                                             | NA            | 1.50         | 0.489354                | 0.916154 |          |     |          | NA  | NA                     | NA | 20.76 | 0.70       | 0.19                    | 0.63044                     |          |     |     |     | 1.53933  | NA  | NA                     | NA | 43.13 | 1.08       | 0.25               |                             |
| OB8T11     | Vacuolar proton pump subunit SFD alpha isoform                                                                      | NA            | 3.50         | -0.0927                 | 0.965454 |          |     |          | NA  | NA                     | NA | 49.66 | 0.44       | 0.56                    | -0.29183                    |          |     |     |     | 0.314185 | NA  | NA                     | NA | 29.27 | 0.01       | 0.98               |                             |
| O51T98     | Torsin-1A-interacting protein 1                                                                                     | DRYAI1P1      | 1.00         | 0.256852                | 0.927474 |          |     |          | NA  | NA                     | NA | 3.32  | 0.22       | 0.62                    | 0.270553                    |          |     |     |     | -0.4261  | NA  | NA                     | NA | 33.50 | -0.08      | 0.96               |                             |
| AA0A04J2C3 | Transitionally-controlled tumor protein                                                                             | TPT1          | 1.50         | 0.333424                | -0.02862 |          |     |          | NA  | NA                     | NA | 17.65 | 0.15       | 0.55                    | 0.280302                    |          |     |     |     | -0.50555 | NA  | NA                     | NA | 37.59 | -0.11      | 0.82               |                             |
| AA0A04DGE4 | Syntaxin-3 (Fragment)                                                                                               | STX3          | 5.00         | -0.89038                | -1.626   |          |     |          | NA  | NA                     | NA | 35.29 | -1.26      | 0.18                    | -0.80202                    |          |     |     |     | -1.68419 | NA  | NA                     | NA | 41.94 | -1.24      | 0.22               |                             |
| O15400     | Syntaxin-7                                                                                                          | STX7          | 2.00         | -0.4917                 |          | -0.00343 |     |          |     |                        |    |       |            |                         |                             |          |     |     |     |          |     |                        |    |       |            |                    |                             |

| UniProt    | Protein name                                                                                                | Gene name | Peptide mean | 08/017 hESC-RPE to hRPE |     |          |          |     |     |                        |       |       |            | 08/023 hESC-RPE to hRPE |                             |          |          |          |     |     |     |                        |       |      |            |                    |                             |
|------------|-------------------------------------------------------------------------------------------------------------|-----------|--------------|-------------------------|-----|----------|----------|-----|-----|------------------------|-------|-------|------------|-------------------------|-----------------------------|----------|----------|----------|-----|-----|-----|------------------------|-------|------|------------|--------------------|-----------------------------|
|            |                                                                                                             |           |              | Analysis                |     |          |          |     |     | Technical replicate CV |       |       | Biological | Fold change (mean)      | Unadjusted p-value (t-test) | Analysis |          |          |     |     |     | Technical replicate CV |       |      | Biological | Fold change (mean) | Unadjusted p-value (t-test) |
|            |                                                                                                             |           |              | 1.1                     | 1.2 | 2.1      | 2.2      | 3.1 | 3.2 | 1                      | 2     | 3     | CV         |                         |                             | 1.1      | 1.2      | 2.1      | 2.2 | 3.1 | 3.2 | 1                      | 2     | 3    | CV         |                    |                             |
| F61LK2     | Glyoxalase domain-containing protein 4                                                                      | GLOD4     | 2.50         |                         |     | 1.012211 | 0.466462 |     | NA  | NA                     | NA    | 26.43 | 0.74       | 0.23                    |                             |          | 0.450249 | -0.10929 |     | NA  | NA  | NA                     | 27.09 | 0.17 | 0.65       |                    |                             |
| O53HV6     | Niemann-Pick disease, type C2 variant (Fragment)                                                            | NA        | 3.50         |                         |     | 1.134689 | 0.92909  |     | NA  | NA                     | 10.06 | 1.03  | 0.06       |                         |                             | 1.236955 | 0.900383 |          | NA  | NA  | NA  | 16.42                  | 1.07  | 0.10 |            |                    |                             |
| Y9HWJ1     | Glutathione synthetase                                                                                      | GSS       | 2.50         |                         |     | 0.52215  | 0.395652 |     | NA  | NA                     | 6.20  | 0.46  | 0.09       |                         |                             | 0.569656 | 0.361053 |          | NA  | NA  | NA  | 10.21                  | 0.47  | 0.14 |            |                    |                             |
| P30711     | Glutathione S-transferase theta-1                                                                           | GSTT1     | 1.00         |                         |     | 0.681697 | 0.671259 |     | NA  | NA                     | 0.51  | 0.68  | 0.00       |                         |                             | 0.979295 | 1.955803 |          | NA  | NA  | NA  | 46.09                  | 1.47  | 0.20 |            |                    |                             |
| Q13509     | Tubulin beta-3 chain                                                                                        | TUBB3     | 31.50        |                         |     | -0.61991 | -3.02394 |     | NA  | NA                     | 96.47 | -1.82 | 0.37       |                         |                             | 0.014563 | -1.02090 |          | NA  | NA  | NA  | 49.03                  | -0.51 | 0.51 |            |                    |                             |
| Q14315     | Flavin-C                                                                                                    | FLNC      | 5.50         |                         |     | -0.06815 | 0.737786 |     | NA  | NA                     | 38.50 | 0.33  | 0.56       |                         |                             | 0.450249 | 0.636313 |          | NA  | NA  | NA  | 9.11                   | 0.54  | 0.11 |            |                    |                             |
| O232W2     | Galectin-related protein                                                                                    | LGALS4    | 1.00         |                         |     | 2.06489  | -1.32023 |     | NA  | NA                     | 35.71 | -1.69 | 0.14       |                         |                             | -1.45937 | -0.93153 |          | NA  | NA  | NA  | 25.59                  | -1.20 | 0.14 |            |                    |                             |
| A0A088QF11 | Choline transporter-like protein 2 isoform 2                                                                | SLC44A2   | 2.00         |                         |     | 0.150526 | -0.26399 |     | NA  | NA                     | 20.20 | -0.06 | 0.83       |                         |                             | 0.421898 | -0.09045 |          | NA  | NA  | NA  | 24.85                  | 0.17  | 0.63 |            |                    |                             |
| B2RA03     | cDNA, FLJ194640, highly similar to Homo sapiens keratin 18 (KRT18), mRNA                                    | NA        | 9.50         |                         |     | 1.59447  | 1.263141 |     | NA  | NA                     | 16.17 | 1.43  | 0.07       |                         |                             | 2.047228 | 1.128552 |          | NA  | NA  | NA  | 43.56                  | 1.59  | 0.18 |            |                    |                             |
| B4DDM5     | cDNA FLJ53298, highly similar to Peroxisomal multifunctional enzyme type 2                                  | NA        | 6.00         |                         |     | 0.289911 | 0.238256 |     | NA  | NA                     | 2.53  | 0.26  | 0.06       |                         |                             | 0.043254 | 0.234993 |          | NA  | NA  | NA  | 9.38                   | 0.14  | 0.38 |            |                    |                             |
| B4DWX6     | cDNA FLJ53936, highly similar to Medium-chain specific acyl-CoA dehydrogenase, mitochondrial (EC 1.3.99 NA) | NA        | 7.00         |                         |     | -0.45147 | -0.09779 |     | NA  | NA                     | 17.25 | -0.27 | 0.36       |                         |                             | -0.4049  | -0.14664 |          | NA  | NA  | NA  | 12.63                  | -0.28 | 0.28 |            |                    |                             |
| MOR3D6     | 60S ribosomal protein L18a (Fragment)                                                                       | RPL18A    | 1.00         |                         |     | 1.449878 | -0.08065 |     | NA  | NA                     | 68.69 | 0.68  | 0.54       |                         |                             | 0.966041 | 0.663061 |          | NA  | NA  | NA  | 14.80                  | 0.81  | 0.12 |            |                    |                             |
| O53GW1     | Vesicle transport-related protein isoform a variant (Fragment)                                              | NA        | 1.00         |                         |     | -1.84339 | 0.552086 |     | NA  | NA                     | 96.25 | -0.65 | 0.69       |                         |                             | -0.5704  | 0.470995 |          | NA  | NA  | NA  | 48.94                  | -0.05 | 0.94 |            |                    |                             |
| O510G8     | Annexin                                                                                                     | ANXA11    | 1.50         |                         |     | -0.4261  | 1.29344  |     | NA  | NA                     | 75.54 | 0.43  | 0.70       |                         |                             | -0.32275 | 1.464881 |          | NA  | NA  | NA  | 77.90                  | 0.57  | 0.64 |            |                    |                             |
| P14136     | Glial fibrillary acidic protein                                                                             | GFAP      | 42.50        |                         |     | -1.46451 | -0.50684 |     | NA  | NA                     | 45.29 | -0.99 | 0.29       |                         |                             | -1.62929 | -0.09479 |          | NA  | NA  | NA  | 68.84                  | -0.86 | 0.46 |            |                    |                             |

## Proteins discarded based on CV&gt;100, n=27

| UniProt    | Protein name                                                                                                    | Gene name    | Peptide mean | 08/017 hESC-RPE to hRPE |     |          |           |          |          |                        |          |        |            | 08/023 hESC-RPE to hRPE |                             |          |          |          |          |          |          |                        |          |        |            |                    |                             |       |      |
|------------|-----------------------------------------------------------------------------------------------------------------|--------------|--------------|-------------------------|-----|----------|-----------|----------|----------|------------------------|----------|--------|------------|-------------------------|-----------------------------|----------|----------|----------|----------|----------|----------|------------------------|----------|--------|------------|--------------------|-----------------------------|-------|------|
|            |                                                                                                                 |              |              | Analysis                |     |          |           |          |          | Technical replicate CV |          |        | Biological | Fold change (mean)      | Unadjusted p-value (t-test) | Analysis |          |          |          |          |          | Technical replicate CV |          |        | Biological | Fold change (mean) | Unadjusted p-value (t-test) |       |      |
|            |                                                                                                                 |              |              | 1.1                     | 1.2 | 2.1      | 2.2       | 3.1      | 3.2      | 1                      | 2        | 3      | CV         |                         |                             | 1.1      | 1.2      | 2.1      | 2.2      | 3.1      | 3.2      | 1                      | 2        | 3      | CV         |                    |                             |       |      |
| B4DDY1     | cDNA FLJ56133, highly similar to Serine/threonine-protein phosphatase 2A 65 kDa regulatory subunit A (Fragment) | PPP2R1A      | 8.00         |                         |     | -0.3918  | 2.257805  | -0.29775 | -1.57484 | -1.09601               | -0.57069 | 102.54 | 58.80      | 25.47                   | 97.26                       | -0.28    | 0.69     | -0.51545 | 1.624378 | -0.48512 | -2.29245 | -0.85588               | -0.41016 | 89.11  | 78.57      | 21.67              | 77.62                       | -0.49 | 0.48 |
| O53GF5     | Proteasome subunit alpha type (Fragment)                                                                        | NA           | 2.00         |                         |     | 0.147863 | 2.568128  | -0.21605 | 5.627716 | -0.85977               | -2.77438 | 96.90  | 136.58     | 82.13                   | 139.54                      | 0.75     | 0.63     | 0.279953 | 2.280166 | 1.103141 | 4.498103 | -0.47434               | -1.01388 | 84.86  | 116.87     | 26.14              | 116.35                      | -0.11 | 0.39 |
| O53XL8     | Proteasome (Prosome, macropain) 26S subunit, ATPase, 1                                                          | PSMC1        | 2.83         |                         |     | -0.7848  | -0.11124  | 0.90071  | -0.68624 | -0.75556               | 0.115652 | 32.43  | 70.78      | 41.45                   | 27.88                       | -0.22    | 0.32     | -1.42089 | 1.466605 | 0.398366 | 0.926756 | -0.12183               | 1.040636 | 107.75 | 25.61      | 54.08              | 3.97                        | 0.38  | 0.18 |
| E7EPM6     | Long-chain-fatty-acyl-CoA ligase 1                                                                              | ACSL1        | 1.83         |                         |     | 1.01994  | 1.104866  | 1.388994 | 0.088328 | 0.033507               | -1.73762 | 4.16   | 5.76       | 77.33                   | 49.83                       | 0.32     | 0.65     | 0.89551  | 1.024472 | 1.776479 | -1.05007 | 0.444257               | 0.294413 | 6.32   | 106.48     | 7.34               | 21.92                       | 0.56  | 0.10 |
| O53F54     | Lectin, mannose-binding, 1 variant (Fragment)                                                                   | NA           | 1.40         |                         |     | -0.61178 | 2.077063  | -1.10412 | -0.51184 | 0.345705               | 103.45   | 88.63  | NA         | 65.52                   | 0.04                        | 0.86     | -0.80977 | 2.314549 | -1.43124 | -0.24055 | -0.01058 | 112.32                 | 55.26    | NA     | 79.19      | -1.04              | 0.95                        |       |      |
| A0A068Y4A0 | Protein TMED7-TICAM2                                                                                            | TMED7-TICAM2 | 3.60         |                         |     | -0.3498  | 0.394918  | -0.34275 | -0.51071 | -0.83991               | 35.71    | 8.22   | NA         | 31.60                   | -0.33                       | 0.24     | -2.99126 | 0.216114 | -0.36815 | -1.78756 | -0.46791 | 113.79                 | 64.45    | NA     | 15.14      | -0.08              | 0.07                        |       |      |
| A4Q9B0     | IQ motif containing GTPase activating protein 1                                                                 | IQGAP1       | 4.00         |                         |     | 1.985856 | -0.75415  | -0.24245 | 0.435135 | 1.423423               | 104.60   | 32.61  | NA         | 40.74                   | 0.57                        | 0.21     | 1.128331 | 0.320561 | -0.13243 | 0.461472 | 2.068721 | 38.59                  | 28.70    | NA     | 68.92      | 0.77               | 0.22                        |       |      |
| K7ELC2     | 40S ribosomal protein S15                                                                                       | RPS15        | 3.00         |                         |     | 0.04286  | 1.45646   | -0.29905 | -0.42894 | -0.21708               | 64.23    | 6.36   | NA         | 52.60                   | 0.11                        | 0.89     | -0.92486 | 1.735819 | -0.01808 | 0.330533 | -0.09845 | 102.80                 | 17.00    | NA     | 39.77      | 0.20               | 0.40                        |       |      |
| Y9HWH6     | Purine nucleoside phosphorylase                                                                                 | PNP          | 2.00         |                         |     | 0.143415 | 0         | -1.5956  | 0.019095 | -3.51167               | 7.02     | NA     | 118.90     | 57.37                   | -0.99                       | 0.20     | 0.064492 | 0.369483 | -8.83314 | -0.09001 | -2.32589 | 14.89                  | NA       | 91.89  | 98.48      | -1.56              | 0.34                        |       |      |
| P3527      | Keratin, type I cytoskeletal 9                                                                                  | KRT9         | 2.00         |                         |     | 2.635288 | 1.562258  | 0.719331 | 0.178157 | -0.58758               | 50.29    | NA     | 36.67      | 81.97                   | 0.90                        | 0.32     | 2.365015 | -0.19659 | 0.600774 | 0.556493 | 0.03396  | 100.45                 | NA       | 25.33  | 49.43      | 0.67               | 0.10                        |       |      |
| A0A024R324 | RHOA homolog gene family, member A, isoform CRA_a                                                               | RHOA         | 4.60         |                         |     | 0.00452  | -0.411712 | -0.47107 | 1.275839 | -2.25874               | 19.83    | NA     | 118.95     | 28.94                   | 0.21                        | 0.39     | 0.254096 | 0.823228 | -0.32212 | 0.892719 | -0.63473 | 27.54                  | NA       | 68.58  | 29.38      | 0.20               | 0.69                        |       |      |
| O61AV5     | Succinyl-CoA:3-ketoacid-coenzyme A transferase                                                                  | OXC1         | 8.50         |                         |     | -0.23313 | -0.00504  | -0.47547 | 3.211121 | 0.244592               | NA       | 22.85  | 109.34     | 109.16                  | 0.55                        | 0.59     | -0.15355 | -0.13743 | -0.29803 | 2.577915 | 0.138214 | NA                     | 7.86     | 97.40  | 86.86      | 0.43               | 0.59                        |       |      |
| P02768     | Serum albumin                                                                                                   | ALB          | 74.50        |                         |     | 3.898454 | 3.235203  | 1.032887 | 0.830837 |                        | 31.95    | 9.89   | NA         | 103.00                  | 2.25                        | 0.34     | 3.635735 | 3.125267 | 0.830628 | 0.912214 |          | 24.76                  | 40.00    | NA     | 99.70      | 2.13               | 0.34                        |       |      |
| E7EV99     | Alpha-adducin                                                                                                   | ADD1         | 2.25         |                         |     | -0.62812 | 2.092991  | 0.028328 | -1.52105 |                        | 104.17   | NA     | NA         | 84.47                   | -0.01                       | 0.74     | -0.32472 | 2.223352 | -1.52467 | -1.15184 |          | 100.12                 | NA       | NA     | 114.61     | -0.19              | 0.53                        |       |      |
| P61266     | Syntaxin-1B                                                                                                     | STX1B        | 1.50         |                         |     | -1.37588 | 1.619351  |          | 0.436303 | -0.80196               | 109.90   | NA     | 57.22      | 40.21                   | -0.03                       | 0.87     | -2.28067 | 1.030957 |          | 0.723838 | -1.45494 | 115.54                 | NA       | 90.25  | 7.72       | -0.50              | 0.16                        |       |      |
| O8N111     | Cell cycle exit and neuronal differentiation protein 1                                                          | CEND1        | 1.00         |                         |     | -1.8046  | -1.48824  |          | -1.8195  | -2.42108               | 15.44    | NA     | 29.07      | 21.95                   | -1.88                       | 0.08     | -4.97739 | -0.47235 |          | -1.43891 | -1.69376 | 32.49                  | NA       | 12.56  | 7.32       | -2.15              | 0.17                        |       |      |
| O96D8      | Heme oxygenase (Decycling) 1                                                                                    | HMOX1        | 2.50         |                         |     | 0.578621 | -0.01118  |          | -0.52924 | 2.540652               | 3.117282 | NA     | 43.47      | 27.89                   | 107.12                      | 1.38     | 0.52     | 0.682308 | -0.39651 |          | 2.702681 | -0.60512               | NA       | NA     | 115.48     | 73.11              | 0.60                        | 0.41  |      |
| O14980     | Exportin-1                                                                                                      | XPO1         | 4.00         |                         |     | 0.387273 | -0.52924  | 2.540652 | 3.117282 | NA                     | 43.47    | 27.89  | 107.12     | 1.38                    | 0.52                        | 0.682308 | -0.39651 |          | 2.702681 | -0.60512 | NA       | NA                     | 115.48   | 73.11  | 0.60       | 0.41               |                             |       |      |
| P35908     | Keratin, type II cytoskeletal 2 epidermal                                                                       | KRT2         | 2.00         |                         |     | 2.308281 | 2.330105  | 0.160144 |          |                        | 1.07     | NA     | 89.68      | 1.60                    | 0.46                        | 2.439655 | 2.923062 | -0.18986 |          |          | 23.47    | NA                     | NA       | 107.83 | 1.72       | 0.55               |                             |       |      |
| A0A024R105 | N-acetylgalactosaminidase, alpha-, isoform CRA_a                                                                | NAGA         | 1.00         |                         |     | -1.80804 | 1.935708  | -0.4304  |          |                        | 121.77   | NA     | NA         | 64.00                   | -0.59                       | 0.14     | -1.96365 | 0.733568 | -0.42206 |          |          | 103.64                 | NA       | NA     | 17.67      | -0.55              | 0.12                        |       |      |
| B4DM33     | cDNA FLJ52068, highly similar to Microtubule-associated protein RP/EB family member 1                           | NA           | 1.33         |                         |     | -0.1978  | 1.103983  | 1.793544 |          |                        | 59.80    | NA     | 55.58      | 90.30                   | 0.34                        | 0.40     | -0.19892 | 0.790605 | 3.052157 |          |          | 46.68                  | NA       | NA     | 103.09     | 1.21               | 0.44                        |       |      |
| O53HS0     | Glutaminyt-RNA synthetase variant (Fragment)                                                                    | NA           | 2.00         |                         |     | 1.116794 |           |          | 2.369991 |                        | NA       | NA     | 87.16      | 0.93                    | 0.40                        | -1.92986 | -0.22907 |          | 2.17305  |          |          | NA                     | NA       | 122.69 | 0.00       | 1.00               |                             |       |      |
| E5RUF2     | Bifunctional epoxide hydrolase 2                                                                                | EPHX2        | 3.00         |                         |     | -1.12087 | 1.19344   |          |          |                        | NA       | NA     | NA         | 94.07                   | 0.04                        | 0.98     | -2.25503 | 0.491488 |          |          |          | NA                     | NA       | NA     | 110.79     | 1.03               | 0.62                        |       |      |
| Q13526     | Peptidyl-prolyl cis-trans isomerase NIMA-interacting 1                                                          | PIN1         | 1.00         |                         |     | 2.227067 |           |          | -0.33358 |                        | NA       | NA     | NA         | 100.43                  | 0.95                        | 0.59     | 0.972458 |          |          | 0.094827 |          | NA                     | NA       | NA     | 41.74      | -0.53              | 0.44                        |       |      |
| A0A024R444 | RAB17, member RAS oncogene family, isoform CRA_a                                                                | RAB17        | 1.00         |                         |     |          | 2.22379   | -1.52907 |          |                        | NA       | NA     | NA         | 33.41                   | -1.88                       | 0.12     | 0.96674  | -0.03366 |          |          |          | NA                     | NA       | NA     | 108.45     | -2.52              | 0.33                        |       |      |
| B2RSV9     | cDNA, FLJ2652, highly similar to Homo sapiens high density lipoprotein binding protein (villin)(HDLBP)          | nNA          | 2.50         |                         |     | 1.43295  |           | -1.23882 |          |                        | NA       | NA     | NA         | 103.05                  | 0.10                        | 0.95     | 0.744588 |          |          | -1.27904 |          | NA                     |          |        |            |                    |                             |       |      |



| UniProt    | Protein name                                                                                               | Gene name     | Peptide mean | 08/017 hESC-RPE to hRPE |          |          |          |     |     |                        |       |    |               |                    | 08/023 hESC-RPE to hRPE     |          |          |     |     |       |       |                        |    |    |               |                    |                             |
|------------|------------------------------------------------------------------------------------------------------------|---------------|--------------|-------------------------|----------|----------|----------|-----|-----|------------------------|-------|----|---------------|--------------------|-----------------------------|----------|----------|-----|-----|-------|-------|------------------------|----|----|---------------|--------------------|-----------------------------|
|            |                                                                                                            |               |              | Analysis                |          |          |          |     |     | Technical replicate CV |       |    | Biological CV | Fold change (mean) | Unadjusted p-value (t-test) | Analysis |          |     |     |       |       | Technical replicate CV |    |    | Biological CV | Fold change (mean) | Unadjusted p-value (t-test) |
|            |                                                                                                            |               |              | 1.1                     | 1.2      | 2.1      | 2.2      | 3.1 | 3.2 | 1                      | 2     | 3  |               |                    |                             | 1.1      | 1.2      | 2.1 | 2.2 | 3.1   | 3.2   | 1                      | 2  | 3  |               |                    |                             |
| Q7Z3HS     | Mitogen-activated protein kinase (Fragment)                                                                | DKFZp686O0215 | 2.50         | 0.234574                | -0.1539  |          |          |     |     | 18.93                  | NA    | NA | NA            | 0.04               | NA                          | 0.061556 | -0.39266 |     |     | 22.08 | NA    | NA                     | NA | NA | -0.17         | NA                 |                             |
| Q8J014     | Ribosomal protein S2                                                                                       | rps2          | 5.00         | -0.24554                | -0.09129 |          |          |     |     | 7.55                   | NA    | NA | NA            | -0.17              | NA                          | -0.21587 | 0.553102 |     |     | 36.82 | NA    | NA                     | NA | NA | 0.17          | NA                 |                             |
| S4R3Z2     | Aldo-keto reductase family 1 member C3                                                                     | AKR1C3        | 1.50         | -0.26079                | -0.05396 |          |          |     |     | 10.12                  | NA    | NA | NA            | -0.16              | NA                          | -0.44963 | -0.01284 |     |     | 21.25 | NA    | NA                     | NA | NA | -0.23         | NA                 |                             |
| X6R700     | Chromatin target of PRMT1 protein                                                                          | CHT0P         | 1.00         | -0.26599                | -0.01392 |          |          |     |     | 12.32                  | NA    | NA | NA            | -0.14              | NA                          | -1.83378 | -0.13697 |     |     | 74.74 | NA    | NA                     | NA | NA | -0.99         | NA                 |                             |
| P22676     | Calretinin                                                                                                 | CALB2         | 3.00         | -0.02682                | -0.05199 |          |          |     |     | 1.23                   | NA    | NA | NA            | -0.04              | NA                          | -0.14003 | 0.362129 |     |     | 24.37 | NA    | NA                     | NA | NA | 0.11          | NA                 |                             |
| Q99729     | Heterogeneous nuclear ribonucleoprotein A/B                                                                | HNRNPAB       | 3.00         | -0.71141                | -1.67322 |          |          |     |     | 45.47                  | NA    | NA | NA            | -1.19              | NA                          | -0.63116 | -1.24721 |     |     | 29.74 | NA    | NA                     | NA | NA | -0.94         | NA                 |                             |
| AA0248RD08 | Mitochondrial carrier homolog 1 (C. elegans), isoform CRA_d                                                | MTC1H         | 1.00         | -1.0642                 | 0.101509 |          |          |     |     | 54.22                  | NA    | NA | NA            | -0.48              | NA                          | -0.95768 | 0.283384 |     |     | 57.34 | NA    | NA                     | NA | NA | -0.34         | NA                 |                             |
| ETC7C4     | Apoptotic chromatin condensation inducer in the nucleus                                                    | ACIN1         | 1.50         | 0.652077                | -0.0762  |          |          |     |     | 34.96                  | NA    | NA | NA            | 0.29               | NA                          | 0.828239 | -0.80934 |     |     | 72.63 | NA    | NA                     | NA | NA | 0.01          | NA                 |                             |
| F5H760     | Microssomal glutathione S-transferase 1 (Fragment)                                                         | MGST1         | 1.00         | 1.847866                | 1.934864 |          |          |     |     | 4.26                   | NA    | NA | NA            | 1.89               | NA                          | 1.921888 | 1.779544 |     |     | 6.97  | NA    | NA                     | NA | NA | 1.85          | NA                 |                             |
| Q3B790     | High-mobility group nucleosome binding domain 1                                                            | HMGN1         | 1.00         | -3.14243                | -5.88056 |          |          |     |     | 104.55                 | NA    | NA | NA            | -4.51              | NA                          | -3.81438 | -2.31309 |     |     | 29.05 | NA    | NA                     | NA | NA | -3.51         | NA                 |                             |
| Q75880     | Protein SCO1 homolog, mitochondrial                                                                        | SCO1          | 1.00         |                         |          | 0.092894 | -0.78862 |     |     | NA                     | 41.91 | NA | NA            | -0.35              | NA                          | 0.06893  | -1.95454 |     |     | NA    | 85.59 | NA                     | NA | NA | -0.94         | NA                 |                             |
| O95168     | NADH dehydrogenase [ubiquinone] 1 beta subcomplex subunit 4                                                | NDUFB4        | 2.00         | 0.355721                | -1.19972 |          |          |     |     | NA                     | 26.89 | NA | NA            | 0.08               | NA                          | 0.050478 | -1.31551 |     |     | NA    | 62.36 | NA                     | NA | NA | -0.63         | NA                 |                             |
| O95372     | ADP-protein thioesterase 2                                                                                 | LYPLA2        | 2.50         | 0.347412                | 1.383425 |          |          |     |     | NA                     | 48.70 | NA | NA            | 0.87               | NA                          | 0.614932 | 1.169224 |     |     | NA    | 26.84 | NA                     | NA | NA | 0.89          | NA                 |                             |
| Q15056     | Eukaryotic translation initiation factor 4H                                                                | EIF4H         | 1.00         | -0.25                   | -0.12106 |          |          |     |     | NA                     | 6.32  | NA | NA            | -0.19              | NA                          | 0.512927 | 0.249428 |     |     | NA    | 12.88 | NA                     | NA | NA | 0.38          | NA                 |                             |
| Q6F587     | Acylpyruvase FAHD1, mitochondrial                                                                          | FAHD1         | 1.50         | -1.13581                | -0.57799 |          |          |     |     | NA                     | 27.00 | NA | NA            | -0.86              | NA                          | -0.97466 | -0.83764 |     |     | NA    | 6.71  | NA                     | NA | NA | -0.91         | NA                 |                             |
| Q8J011     | Mitochondrial Rho GTPase 2                                                                                 | RHOI2         | 2.50         | -0.37058                | -0.40222 |          |          |     |     | NA                     | 1.55  | NA | NA            | -0.39              | NA                          | -1.03354 | -0.42237 |     |     | NA    | 29.51 | NA                     | NA | NA | -0.73         | NA                 |                             |
| Q9R866     | ADP-dependent glucokinase                                                                                  | ADPGK         | 2.50         | -0.43577                | 0.33461  |          |          |     |     | NA                     | 36.99 | NA | NA            | -0.05              | NA                          | -0.27498 | 0.926678 |     |     | NA    | 56.12 | NA                     | NA | NA | 0.33          | NA                 |                             |
| Q9HBL7     | Plasminogen receptor (KT)                                                                                  | PLGRKT        | 1.00         | -1.87978                | -0.10198 |          |          |     |     | NA                     | 77.56 | NA | NA            | -0.99              | NA                          | -1.66402 | -0.53122 |     |     | NA    | 52.83 | NA                     | NA | NA | -1.10         | NA                 |                             |
| Q9NRZ7     | 1-acyl-sn-glycerol-3-phosphate acyltransferase gamma                                                       | AGPAT3        | 2.00         | -0.54329                | -0.59581 |          |          |     |     | NA                     | 2.57  | NA | NA            | -0.57              | NA                          | -1.01859 | -1.32559 |     |     | NA    | 14.99 | NA                     | NA | NA | -1.17         | NA                 |                             |
| Q9Y305     | ACOT9 coenzyme A thioesterase 9, mitochondrial                                                             | ACOT9         | 3.00         | -0.54214                | 0.717248 |          |          |     |     | NA                     | 58.08 | NA | NA            | 0.09               | NA                          | -0.75206 | -0.41563 |     |     | NA    | 16.42 | NA                     | NA | NA | -0.58         | NA                 |                             |
| O9Y678     | Cootamer subunit gamma-1                                                                                   | COG1          | 2.50         | 1.095997                | 1.589923 |          |          |     |     | NA                     | 23.98 | NA | NA            | 1.34               | NA                          | 0.552288 | 1.689343 |     |     | NA    | 52.79 | NA                     | NA | NA | -1.12         | NA                 |                             |
| AA04248Y50 | Guanine nucleotide binding protein (G protein), beta 5, isoform CRA_c                                      | GNB5          | 2.50         | -1.94666                | -1.57484 |          |          |     |     | NA                     | 18.12 | NA | NA            | -1.76              | NA                          | -1.68828 | -1.79367 |     |     | NA    | 5.16  | NA                     | NA | NA | -1.74         | NA                 |                             |
| AA04248X9  | Pyruvate dehydrogenase E1 component subunit alpha                                                          | PDHA1         | 6.50         | -0.2099                 | -0.74202 |          |          |     |     | NA                     | 25.79 | NA | NA            | -0.48              | NA                          | -0.73595 | -0.59154 |     |     | NA    | 7.07  | NA                     | NA | NA | -0.66         | NA                 |                             |
| B2R5I8     | Collagen, type XVIII, alpha 1, isoform CRA_b                                                               | COL18A1       | 1.00         | 0.709241                | 0.290026 |          |          |     |     | NA                     | 20.40 | NA | NA            | 0.50               | NA                          | 1.093805 | 0.318037 |     |     | NA    | 37.13 | NA                     | NA | NA | 0.71          | NA                 |                             |
| B2R4W48    | cDNA FLJ95164, highly similar to Homo sapiens SEC14-like 2 (S. cerevisiae) (SEC14L2), mRNA                 | GNB3          | 1.00         | 0.881128                | 0.741261 |          |          |     |     | NA                     | 6.85  | NA | NA            | 0.81               | NA                          | 1.128596 | 1.036258 |     |     | NA    | 4.52  | NA                     | NA | NA | 1.08          | NA                 |                             |
| B3K0S1     | cDNA PSEC0102 fls. clone NT2RP2003127, highly similar to Prolamin-1                                        | NA            | 4.50         | -1.02271                | -1.01124 |          |          |     |     | NA                     | 0.56  | NA | NA            | -1.02              | NA                          | -1.33681 | -1.00177 |     |     | NA    | 6.35  | NA                     | NA | NA | -1.17         | NA                 |                             |
| B4DPX0     | Lon protease homolog                                                                                       | NA            | 5.50         | 0                       | -1.03104 |          |          |     |     | NA                     | 48.49 | NA | NA            | -0.52              | NA                          | -0.36358 | -0.64539 |     |     | NA    | 13.77 | NA                     | NA | NA | -0.50         | NA                 |                             |
| B4DWV5     | GrpE protein homolog                                                                                       | NA            | 1.50         | -0.90041                | -0.64319 |          |          |     |     | NA                     | 12.57 | NA | NA            | -0.77              | NA                          | -1.4581  | -0.77455 |     |     | NA    | 32.89 | NA                     | NA | NA | -1.12         | NA                 |                             |
| B4E364     | cDNA FLJ58832, highly similar to Heterogeneous nuclear ribonucleoprotein A3                                | NA            | 3.00         | 0.351573                | 0.377451 |          |          |     |     | NA                     | 1.27  | NA | NA            | 0.36               | NA                          | 0.505638 | 0.511011 |     |     | NA    | 0.26  | NA                     | NA | NA | 0.51          | NA                 |                             |
| B5BU72     | Phosphatidylinositol-binding clathrin assembly protein isoform 2                                           | PICALM        | 2.00         | -0.06756                | 0.418268 |          |          |     |     | NA                     | 23.59 | NA | NA            | 0.18               | NA                          | 0.164149 | 0.61962  |     |     | NA    | 22.14 | NA                     | NA | NA | 0.39          | NA                 |                             |
| B7Z4P9     | cDNA FLJ1678, highly similar to Ras-related protein Rab-18                                                 | NA            | 1.50         | -0.59801                | -0.88611 |          |          |     |     | NA                     | 14.07 | NA | NA            | -0.74              | NA                          | -0.98015 | -1.24922 |     |     | NA    | 13.15 | NA                     | NA | NA | -1.11         | NA                 |                             |
| B7Z8X5     | cDNA FLJ61541, highly similar to Homo sapiens PDZ and LIM domain 5 (PDLIM5), transcript variant 2, mRNA    | NA            | 1.00         | 0.870004                | -0.05467 |          |          |     |     | NA                     | 43.83 | NA | NA            | 0.41               | NA                          | 1.393173 | 0.298472 |     |     | NA    | 51.22 | NA                     | NA | NA | 0.85          | NA                 |                             |
| B3D5M5     | Collagen, type XVIII, alpha 1, isoform CRA_b                                                               | COL18A1       | 2.00         | -0.18709                | -0.85383 |          |          |     |     | NA                     | 32.11 | NA | NA            | -0.52              | NA                          | 0.269515 | -0.50233 |     |     | NA    | 36.95 | NA                     | NA | NA | -0.12         | NA                 |                             |
| F1T105     | Guanine nucleotide binding protein (G protein), beta polypeptide 3                                         | GNB3          | 6.00         | -0.07201                | -0.58193 |          |          |     |     | NA                     | 24.74 | NA | NA            | -0.33              | NA                          | -0.49472 | 0.311748 |     |     | NA    | 38.53 | NA                     | NA | NA | -0.99         | NA                 |                             |
| FGYQ1      | V-type proton ATPase subunit d1                                                                            | ATP8V0D1      | 1.50         | -0.03895                | -0.74379 |          |          |     |     | NA                     | 33.87 | NA | NA            | -0.39              | NA                          | -0.95825 | -0.10981 |     |     | NA    | 40.43 | NA                     | NA | NA | -0.53         | NA                 |                             |
| I6L975     | Hydroxysteroid dehydrogenase like 1                                                                        | HSDL1         | 2.00         | -0.30821                | -0.27428 |          |          |     |     | NA                     | 1.66  | NA | NA            | -0.29              | NA                          | -1.09114 | -0.89092 |     |     | NA    | 9.80  | NA                     | NA | NA | -0.99         | NA                 |                             |
| J30T77     | Serum paraoxonase/arylesterase 2                                                                           | PON2          | 1.50         | 0.264227                | -1.37154 |          |          |     |     | NA                     | 72.56 | NA | NA            | -0.55              | NA                          | 0.159172 | -0.93608 |     |     | NA    | 51.24 | NA                     | NA | NA | -0.39         | NA                 |                             |
| K7EP0      | Transmembrane protein 205                                                                                  | TMEM205       | 1.00         | 0.378532                | 1.194082 |          |          |     |     | NA                     | 38.94 | NA | NA            | 0.79               | NA                          | 0.196751 | 1.005667 |     |     | NA    | 38.64 | NA                     | NA | NA | 0.60          | NA                 |                             |
| O53F8      | cDNA FLJ36526 fls. clone TRACH2003347, highly similar to NSF1L cofactor p47 (Fragment)                     | NA            | 10.00        | 1.349078                | 1.172724 |          |          |     |     | NA                     | 8.63  | NA | NA            | 1.26               | NA                          | 1.501622 | 1.630012 |     |     | NA    | 6.29  | NA                     | NA | NA | 1.57          | NA                 |                             |
| O5478      | Electron transfer flavoprotein ubiquinone oxidoreductase                                                   | ETFDH         | 2.00         | 1.091775                | 0.434354 |          |          |     |     | NA                     | 31.68 | NA | NA            | 0.76               | NA                          | 0.560719 | 0.187399 |     |     | NA    | 18.20 | NA                     | NA | NA | 0.37          | NA                 |                             |
| O5EK51     | Lactoferrin                                                                                                | NA            | 4.00         | 1.782261                | 1.334923 |          |          |     |     | NA                     | 21.75 | NA | NA            | 1.56               | NA                          | 1.434393 | 1.055448 |     |     | NA    | 18.47 | NA                     | NA | NA | 1.24          | NA                 |                             |
| O5JP88     | Putative uncharacterized protein DKFZp686O1117                                                             | DKFZp686O1117 | 1.50         | 1.490775                | 1.428784 |          |          |     |     | NA                     | 3.04  | NA | NA            | 1.46               | NA                          | 1.099131 | 0.549625 |     |     | NA    | 26.61 | NA                     | NA | NA | 0.82          | NA                 |                             |
| O5TG47     | Xaotin aminopeptidase 1                                                                                    | XNPEP1        | 2.00         | 0.353648                | 0.834981 |          |          |     |     | NA                     | 23.38 | NA | NA            | 0.59               | NA                          | -0.11044 | 0.579991 |     |     | NA    | 38.21 | NA                     | NA | NA | 0.23          | NA                 |                             |
| O6G4C2     | NDUFA7 protein (Fragment)                                                                                  | NDUFA7        | 2.50         | -0.89449                | -0.94732 |          |          |     |     | NA                     | 2.59  | NA | NA            | -0.92              | NA                          | -0.79313 | -0.28998 |     |     | NA    | 24.41 | NA                     | NA | NA | -0.54         | NA                 |                             |
| O6PK92     | AP3D1 protein (Fragment)                                                                                   | AP3D1         | 1.00         | 1.230172                | 0.738261 |          |          |     |     | NA                     | 23.88 | NA | NA            | 0.98               | NA                          | 0.918669 | -0.94723 |     |     | NA    | 80.53 | NA                     | NA | NA | -0.01         | NA                 |                             |
| O6ZS43     | cDNA FLJ45695 fls. clone FEBRA2013570, highly similar to 2-oxoisovalerate dehydrogenase alpha subunit, rNA | NA            | 1.00         | -0.39582                | -0.25905 |          |          |     |     | NA                     | 6.70  | NA | NA            | -0.33              | NA                          | -0.6374  | -0.2055  |     |     | NA    | 21.01 | NA                     | NA | NA | -0.42         | NA                 |                             |
| Q7Z421     | Epsilon-COP                                                                                                | NA            | 1.00         | -0.79134                | 0.822364 |          |          |     |     | NA                     | 71.76 | NA | NA            | 0.02               | NA                          | -0.05047 | -0.42949 |     |     | NA    | 18.47 | NA                     | NA | NA | -0.24         | NA                 |                             |
| P08133     | Annexin A6                                                                                                 | ANXA6         | 42.00        | -1.44729                | -1.23683 |          |          |     |     | NA                     | 10.30 | NA | NA            | -1.34              | NA                          | -1.53669 | -1.14677 |     |     | NA    | 19.00 | NA                     | NA | NA | -1.34         | NA                 |                             |
| O92542     | Nicotinacin                                                                                                | NCSTN         | 1.50         | -0.23745                | -0.94225 |          |          |     |     | NA                     | 33.87 | NA | NA            | -0.59              | NA                          | -0.34965 | -0.5942  |     |     |       |       |                        |    |    |               |                    |                             |

| UniProt    | Protein name                                                                                               | Gene name | Peptide mean | 08/017 hESC-RPE to hRPE |     |     |     |     |     |                        |    |    |            |                    |                             |          | 08/023 hESC-RPE to hRPE |     |     |     |     |                        |    |    |            |                    |                             |    |  |
|------------|------------------------------------------------------------------------------------------------------------|-----------|--------------|-------------------------|-----|-----|-----|-----|-----|------------------------|----|----|------------|--------------------|-----------------------------|----------|-------------------------|-----|-----|-----|-----|------------------------|----|----|------------|--------------------|-----------------------------|----|--|
|            |                                                                                                            |           |              | Analysis                |     |     |     |     |     | Technical replicate CV |    |    | Biological | Fold change (mean) | Unadjusted p-value (t-test) | Analysis |                         |     |     |     |     | Technical replicate CV |    |    | Biological | Fold change (mean) | Unadjusted p-value (t-test) |    |  |
|            |                                                                                                            |           |              | 1.1                     | 1.2 | 2.1 | 2.2 | 3.1 | 3.2 | 1                      | 2  | 3  | CV         |                    |                             | 1.1      | 1.2                     | 2.1 | 2.2 | 3.1 | 3.2 | 1                      | 2  | 3  | CV         |                    |                             |    |  |
| C99426     | Tubulin-folding cofactor B                                                                                 | TBCB      | 1.00         | 0.362992                |     |     |     |     |     | NA                     | NA | NA | NA         | 0.37               | NA                          | 0.313489 |                         |     |     |     |     |                        | NA | NA | NA         | NA                 | 0.31                        | NA |  |
| C99RF8     | Serine/threonine-protein phosphatase CPPED1                                                                | CPPED1    | 1.00         | 0.160775                |     |     |     |     |     | NA                     | NA | NA | NA         | 0.16               | NA                          | -0.29592 |                         |     |     |     |     |                        | NA | NA | NA         | NA                 | -0.30                       | NA |  |
| C9H479     | Fructosamine-3-kinase                                                                                      | FN3K      | 1.00         | -0.03648                |     |     |     |     |     | NA                     | NA | NA | NA         | -0.04              | NA                          | 0.850284 |                         |     |     |     |     |                        | NA | NA | NA         | NA                 | 0.85                        | NA |  |
| C9Y2J2     | Band 4.1-like protein 3                                                                                    | EPB41L3   | 4.00         | -2.1433                 |     |     |     |     |     | NA                     | NA | NA | NA         | -2.14              | NA                          | -2.88547 |                         |     |     |     |     |                        | NA | NA | NA         | NA                 | -2.89                       | NA |  |
| C9Y3B4     | Splicing factor 3B subunit 6                                                                               | SF3B6     | 1.00         | 0.79994                 |     |     |     |     |     | NA                     | NA | NA | NA         | 0.80               | NA                          | 1.036564 |                         |     |     |     |     |                        | NA | NA | NA         | NA                 | 1.04                        | NA |  |
| A0A024R040 | Succinyl-CoA:3-ketoacid-coenzyme A transferase                                                             | COXCT1    | 6.00         | 0.247565                |     |     |     |     |     | NA                     | NA | NA | NA         | 0.25               | NA                          | 0.289666 |                         |     |     |     |     |                        | NA | NA | NA         | NA                 | 0.29                        | NA |  |
| A0A024R1N8 | Solan carrier 16 (Monocarboxylic acid transporters), member 8, isoform CRA_a                               | SCL16A8   | 1.00         | 0.103648                |     |     |     |     |     | NA                     | NA | NA | NA         | 0.10               | NA                          | 0.488929 |                         |     |     |     |     |                        | NA | NA | NA         | NA                 | 0.49                        | NA |  |
| A0A024R1U2 | PHD finger protein 5A, isoform CRA_a                                                                       | PHF5A     | 1.00         | -0.86502                |     |     |     |     |     | NA                     | NA | NA | NA         | -0.57              | NA                          | 0.312078 |                         |     |     |     |     |                        | NA | NA | NA         | NA                 | 0.31                        | NA |  |
| A0A024R4T4 | Ubiquitin-conjugating enzyme E2M (UBC12 homolog, yeast), isoform CRA_a                                     | UBE2M     | 1.00         | 0.645296                |     |     |     |     |     | NA                     | NA | NA | NA         | 0.65               | NA                          | 0.350222 |                         |     |     |     |     |                        | NA | NA | NA         | NA                 | 0.35                        | NA |  |
| A0A024R4X0 | NADH-cytochrome b5 reductase                                                                               | CYB5R3    | 5.00         | -0.23068                |     |     |     |     |     | NA                     | NA | NA | NA         | -0.23              | NA                          | -0.30375 |                         |     |     |     |     |                        | NA | NA | NA         | NA                 | -0.30                       | NA |  |
| A0A024RBC7 | Calcium-transporting ATPase                                                                                | ATP2B1    | 7.00         | -1.17851                |     |     |     |     |     | NA                     | NA | NA | NA         | -1.18              | NA                          | -0.71356 |                         |     |     |     |     |                        | NA | NA | NA         | NA                 | -0.71                       | NA |  |
| A0A024RDY0 | RAN binding protein 5, isoform CRA_d                                                                       | RANBP5    | 3.00         | 0.311616                |     |     |     |     |     | NA                     | NA | NA | NA         | 0.31               | NA                          | -0.76402 |                         |     |     |     |     |                        | NA | NA | NA         | NA                 | -0.76                       | NA |  |
| A0A087WZ07 | Beta-soluble NSF attachment protein                                                                        | NAPB      | 2.00         | -0.82468                |     |     |     |     |     | NA                     | NA | NA | NA         | -0.82              | NA                          | -0.38927 |                         |     |     |     |     |                        | NA | NA | NA         | NA                 | -0.39                       | NA |  |
| A0A0A0M551 | Gelsolin                                                                                                   | GSN       | 11.00        | 0.548617                |     |     |     |     |     | NA                     | NA | NA | NA         | 0.55               | NA                          | 0.560061 |                         |     |     |     |     |                        | NA | NA | NA         | NA                 | 0.56                        | NA |  |
| A0A009S07  | Band 4.1-like protein 1                                                                                    | EPB41L1   | 1.00         | 0.558408                |     |     |     |     |     | NA                     | NA | NA | NA         | 0.56               | NA                          | 0.461661 |                         |     |     |     |     |                        | NA | NA | NA         | NA                 | 0.46                        | NA |  |
| A0A009YU0  | Protein carnegy homolog 4 (Fragment)                                                                       | CNP74     | 1.00         | -0.70497                |     |     |     |     |     | NA                     | NA | NA | NA         | -0.70              | NA                          | 1.226519 |                         |     |     |     |     |                        | NA | NA | NA         | NA                 | 1.23                        | NA |  |
| A1L306     | TNR protein                                                                                                | TNR       | 1.00         | -0.17807                |     |     |     |     |     | NA                     | NA | NA | NA         | -0.18              | NA                          | 1.5142   |                         |     |     |     |     |                        | NA | NA | NA         | NA                 | -1.51                       | NA |  |
| A7E2D8     | Calcium-transporting ATPase                                                                                | ATP2B4    | 14.00        | -0.81461                |     |     |     |     |     | NA                     | NA | NA | NA         | -0.81              | NA                          | -0.90503 |                         |     |     |     |     |                        | NA | NA | NA         | NA                 | -0.91                       | NA |  |
| A8K6V3     | cDNA FLJ78677, highly similar to Homo sapiens splicing factor 3b, subunit 3, 130kDa (SF3B3), mRNA          | NA        | 2.00         | 0.81948                 |     |     |     |     |     | NA                     | NA | NA | NA         | 0.82               | NA                          | -0.14317 |                         |     |     |     |     |                        | NA | NA | NA         | NA                 | -0.14                       | NA |  |
| B1PS43     | Myosin heavy chain 11 smooth muscle isoform                                                                | MYH11     | 3.00         | 2.760716                |     |     |     |     |     | NA                     | NA | NA | NA         | 2.76               | NA                          | 4.146942 |                         |     |     |     |     |                        | NA | NA | NA         | NA                 | 4.15                        | NA |  |
| B2R7W4     | cDNA, FLJ93632, highly similar to Homo sapiens heterogeneous nuclear ribonucleoprotein R (HNRPR), mRNA     | NA        | 6.00         | -0.27121                |     |     |     |     |     | NA                     | NA | NA | NA         | -0.27              | NA                          | -0.40688 |                         |     |     |     |     |                        | NA | NA | NA         | NA                 | -0.41                       | NA |  |
| B2RAC04    | Sodium/potassium-transporting ATPase subunit alpha                                                         | NA        | 19.00        | 0.696118                |     |     |     |     |     | NA                     | NA | NA | NA         | 0.70               | NA                          | -0.08205 |                         |     |     |     |     |                        | NA | NA | NA         | NA                 | -0.08                       | NA |  |
| B2RB89     | Protein kinase, cAMP-dependent, catalytic, beta, isoform CRA_a                                             | PRKACB    | 1.00         | -0.72664                |     |     |     |     |     | NA                     | NA | NA | NA         | -0.73              | NA                          | -0.88911 |                         |     |     |     |     |                        | NA | NA | NA         | NA                 | -0.89                       | NA |  |
| B3KNU0     | cDNA FLJ30470 fs, clone BRAWH1000040, highly similar to Rap1 GTPase-GDP dissociation stimulator 1          | NA        | 4.00         | -2.77466                |     |     |     |     |     | NA                     | NA | NA | NA         | -2.77              | NA                          | -0.70497 |                         |     |     |     |     |                        | NA | NA | NA         | NA                 | -0.70                       | NA |  |
| B3KPP0     | cDNA FLJ1447 fs, clone NT2NE200913, highly similar to Protein phosphatase 2C isoform beta (Cc, 3.1, 3.1NA) | NA        | 1.00         | 1.26994                 |     |     |     |     |     | NA                     | NA | NA | NA         | 1.27               | NA                          | 1.571018 |                         |     |     |     |     |                        | NA | NA | NA         | NA                 | 1.57                        | NA |  |
| B3KY11     | cDNA FLN46571 fs, clone THYMUJ041428, highly similar to Probable ATP-dependent RNA helicase DDX23 (NA)     | NA        | 1.00         | 0.164923                |     |     |     |     |     | NA                     | NA | NA | NA         | 0.16               | NA                          | 0.24206  |                         |     |     |     |     |                        | NA | NA | NA         | NA                 | -0.24                       | NA |  |
| B4DFG0     | Protein DEK                                                                                                | DEK       | 1.00         | -0.02742                |     |     |     |     |     | NA                     | NA | NA | NA         | -0.03              | NA                          | 0.483297 |                         |     |     |     |     |                        | NA | NA | NA         | NA                 | 0.48                        | NA |  |
| B4DIS3     | Dpy-30-like protein, isoform CRA_b                                                                         | LOC84661  | 2.00         | 0.094659                |     |     |     |     |     | NA                     | NA | NA | NA         | 0.09               | NA                          | -1.32885 |                         |     |     |     |     |                        | NA | NA | NA         | NA                 | -1.33                       | NA |  |
| B4DJB1     | cDNA FLJ53049, highly similar to Ap-2 complex subunit mu-1                                                 | NA        | 2.00         | 0.497803                |     |     |     |     |     | NA                     | NA | NA | NA         | 0.50               | NA                          | 0.532603 |                         |     |     |     |     |                        | NA | NA | NA         | NA                 | 0.53                        | NA |  |
| B4DL06     | cDNA FLJ59565, highly similar to Beta-catenin                                                              | NA        | 2.00         | 0.263559                |     |     |     |     |     | NA                     | NA | NA | NA         | 0.26               | NA                          | 0.502294 |                         |     |     |     |     |                        | NA | NA | NA         | NA                 | 0.50                        | NA |  |
| B4DLT2     | cDNA FLJ56637, highly similar to Nuclear pore complex protein Nup155                                       | NA        | 1.00         | -0.45813                |     |     |     |     |     | NA                     | NA | NA | NA         | -0.46              | NA                          | -2.29566 |                         |     |     |     |     |                        | NA | NA | NA         | NA                 | -2.30                       | NA |  |
| B4DP10     | cDNA FLJ55118, highly similar to Hemeryk carrier-associated membrane protein 1                             | NA        | 1.00         | -1.35407                |     |     |     |     |     | NA                     | NA | NA | NA         | -1.35              | NA                          | -0.5684  |                         |     |     |     |     |                        | NA | NA | NA         | NA                 | -0.57                       | NA |  |
| B4DPJ2     | Annexin                                                                                                    | NA        | 4.00         | 1.103297                |     |     |     |     |     | NA                     | NA | NA | NA         | 1.10               | NA                          | 0.903849 |                         |     |     |     |     |                        | NA | NA | NA         | NA                 | 0.90                        | NA |  |
| B4DQV5     | cDNA FLJ59374, highly similar to Homo sapiens caldesmon 1 (CALD1), transcript variant 2, mRNA              | NA        | 1.00         | 1.252283                |     |     |     |     |     | NA                     | NA | NA | NA         | 1.25               | NA                          | 1.653291 |                         |     |     |     |     |                        | NA | NA | NA         | NA                 | 1.65                        | NA |  |
| B4DR82     | cDNA FLN60331, highly similar to Nicastin                                                                  | NA        | 2.00         | 0.031927                |     |     |     |     |     | NA                     | NA | NA | NA         | 0.03               | NA                          | 0.047631 |                         |     |     |     |     |                        | NA | NA | NA         | NA                 | 0.05                        | NA |  |
| B4DSU5     | cDNA FLJ55583, highly similar to Polyglymidine tract-binding protein 2                                     | NA        | 2.00         | -0.61028                |     |     |     |     |     | NA                     | NA | NA | NA         | -0.61              | NA                          | -1.04677 |                         |     |     |     |     |                        | NA | NA | NA         | NA                 | -1.05                       | NA |  |
| B4DTS5     | cDNA FLJ58882, highly similar to 26S proteasome non-ATPase regulatory subunit 11                           | NA        | 2.00         | 0.637852                |     |     |     |     |     | NA                     | NA | NA | NA         | 0.64               | NA                          | 1.594717 |                         |     |     |     |     |                        | NA | NA | NA         | NA                 | 1.59                        | NA |  |
| B4DXZ7     | Thioredoxin domain containing, isoform CRA_b                                                               | TXNDC     | 1.00         | -0.10533                |     |     |     |     |     | NA                     | NA | NA | NA         | -0.11              | NA                          | -0.49771 |                         |     |     |     |     |                        | NA | NA | NA         | NA                 | -0.50                       | NA |  |
| B4E091     | cDNA FLJ55438, highly similar to Splicing factor 3 subunit 1                                               | NA        | 1.00         | -0.07391                |     |     |     |     |     | NA                     | NA | NA | NA         | -0.07              | NA                          | -0.71716 |                         |     |     |     |     |                        | NA | NA | NA         | NA                 | -0.72                       | NA |  |
| B7Z2F7     | cDNA FLJ54655, highly similar to Heat shock 70 kDa protein 12A                                             | NA        | 1.00         | -0.30704                |     |     |     |     |     | NA                     | NA | NA | NA         | -0.31              | NA                          | -0.99431 |                         |     |     |     |     |                        | NA | NA | NA         | NA                 | -0.99                       | NA |  |
| B7Z6J8     | cDNA FLJ53665, highly similar to Four and a half LIM domains protein 1                                     | NA        | 2.00         | -0.77499                |     |     |     |     |     | NA                     | NA | NA | NA         | -0.77              | NA                          | -0.30998 |                         |     |     |     |     |                        | NA | NA | NA         | NA                 | -0.31                       | NA |  |
| B8Z2B8     | CB1 cannabinoid receptor-interacting protein 1                                                             | CNRIP1    | 1.00         | -1.83659                |     |     |     |     |     | NA                     | NA | NA | NA         | -1.84              | NA                          | -0.98128 |                         |     |     |     |     |                        | NA | NA | NA         | NA                 | -0.98                       | NA |  |
| D3SD00     | Protein kinase C and casein kinase substrate in neurons 3, isoform CRA_b                                   | RACSN3    | 1.00         | 0.890599                |     |     |     |     |     | NA                     | NA | NA | NA         | 0.89               | NA                          | -0.50266 |                         |     |     |     |     |                        | NA | NA | NA         | NA                 | -0.50                       | NA |  |
| D3DUG9     | Ubiquitin carboxyl-terminal hydrolase                                                                      | USP14     | 2.00         | 0.503507                |     |     |     |     |     | NA                     | NA | NA | NA         | 0.50               | NA                          | 0.349363 |                         |     |     |     |     |                        | NA | NA | NA         | NA                 | 0.35                        | NA |  |
| E7EPA1     | Phosphoribosyl pyrophosphate synthase-associated protein 2 (Fragment)                                      | PRPSAP2   | 1.00         | 0.552783                |     |     |     |     |     | NA                     | NA | NA | NA         | 0.55               | NA                          | 0.055454 |                         |     |     |     |     |                        | NA | NA | NA         | NA                 | 0.06                        | NA |  |
| E9PP60     | GDP-L-fucose synthase                                                                                      | TSTA3     | 1.00         | 0.845786                |     |     |     |     |     | NA                     | NA | NA | NA         | 0.85               | NA                          | 0.056929 |                         |     |     |     |     |                        | NA | NA | NA         | NA                 | 0.06                        | NA |  |
| F4ZW65     | NF90b                                                                                                      | NA        | 11.00        | 0.262575                |     |     |     |     |     | NA                     | NA | NA | NA         | 0.26               | NA                          | 0.272716 |                         |     |     |     |     |                        | NA | NA | NA         | NA                 | 0.27                        | NA |  |
| F8RH99     | MHC class I antigen (Fragment)                                                                             | HLA-C     | 2.00         | 1.096593                |     |     |     |     |     | NA                     | NA | NA | NA         | 1.10               | NA                          | 0.437432 |                         |     |     |     |     |                        | NA | NA | NA         | NA                 | 0.44                        | NA |  |
| F8VZQ9     | SAP domain-containing ribonucleoprotein                                                                    | SARNP     | 2.00         | 1.005599                |     |     |     |     |     | NA                     | NA | NA | NA         | 1.01               | NA                          | 0.777626 |                         |     |     |     |     |                        | NA | NA | NA         | NA                 | 0.78                        | NA |  |
| G3V500     | Echinoderm microtubule-associated protein-like 1 (Fragment)                                                | EMILT1    | 1.00         | -0.59177                |     |     |     |     |     | NA                     | NA | NA | NA         | -0.59              | NA                          | -0.36903 |                         |     |     |     |     |                        | NA | NA | NA         | NA                 | -0.37                       | NA |  |
| H0YMM8     | 40S ribosomal protein S27                                                                                  | RPS27L    | 1.00         | 0.613613                |     |     |     |     |     | NA                     | NA | NA | NA         | 0.61               | NA                          | 0.599931 |                         |     |     |     |     |                        | NA | NA | NA         | NA                 | 0.60                        | NA |  |
| H7B3Z6     | RNA binding protein EWS (Fragment)                                                                         | NA        | 1.00         | 1.84646                 |     |     |     |     |     | NA                     | NA | NA | NA         | 1.85               | NA                          | 0.981925 |                         |     |     |     |     |                        | NA | NA | NA         | NA                 | 0.98                        | NA |  |
| H7BV58     | Protein-L-isoaspartate O-methyltransferase                                                                 | PCMT1     | 4.00         | 1.380978                |     |     |     |     |     | NA                     | NA | NA | NA         | 1.38               | NA                          | 1.431839 |                         |     |     |     |     |                        | NA | NA | NA         | NA                 | 1.43                        | NA |  |
| H7BY11     | Tropomyosin 1 (Alpha), isoform CRA_m                                                                       | TPM1      | 4.00         | 0.525008                |     |     |     |     |     | NA                     | NA | NA | NA         | 0.53               | NA                          | 1.100908 |                         |     |     |     |     |                        | NA | NA | NA         | NA                 | 1.10                        | NA |  |
| H7C3G9     | N-acetyl-D-glucosamine kinase                                                                              | NAGK      | 1.00         | 0.639116                |     |     |     |     |     | NA                     | NA | NA | NA         | 0.64               | NA                          | 0.87349  |                         |     |     |     |     |                        | NA | NA | NA         | NA                 | 0.19                        | NA |  |
| K7ER9      | Apolipoprotein C-I (Fragment)                                                                              | APOC1     | 1.00         | -0.77466                |     |     |     |     |     | NA                     | NA | NA | NA         | -0.77              | NA                          | -1.16168 |                         |     |     |     |     |                        | NA | NA | NA         | NA                 | -1.16                       | NA |  |
| Q05CK9     | SYNCRIP protein (Fragment)                                                                                 | SYNCRIP   | 5.00         | -0.85463                |     |     |     |     |     | NA                     | NA | NA | NA         | -0.85              | NA                          | -1.49554 |                         |     |     |     |     |                        | NA | NA | NA         | NA                 | -1.50                       | NA |  |
| Q53HD9     | Tetrapeptide repeat domain 1 variant (Fragment)                                                            | NA        | 1.00         | 1.394968                |     |     |     |     |     | NA                     | NA | NA | NA         | 1.39               | NA                          | 1.406356 |                         |     |     |     |     |                        | NA | NA | NA         | NA                 | 1.41                        | NA |  |
| Q53HW7     | Sulfide dehydrogenase like (Fragment)                                                                      | NA        | 1.00         | 1.412673                |     |     |     |     |     | NA                     | NA | NA | NA         | 1.41               | NA                          | 0.781455 |                         |     |     |     |     |                        | NA | NA | NA         | NA                 | 0.78                        | NA |  |
| C53TX0     | Putative uncharacterized protein GLS (Fragment)                                                            | GLS       | 2.00         | 1.096961                |     |     |     |     |     | NA                     | NA | NA | NA         | 1.10               | NA                          | 1.497335 |                         |     |     |     |     |                        | NA | NA | NA         | NA                 | 1.50                        | NA |  |
| C          |                                                                                                            |           |              |                         |     |     |     |     |     |                        |    |    |            |                    |                             |          |                         |     |     |     |     |                        |    |    |            |                    |                             |    |  |







| UniProt    | Protein name                                                                                               | Gene name | Peptide mean | 08/017 hESC-RPE to hRPE |     |          |     |     |     |                        |    |   | 08/023 hESC-RPE to hRPE |                    |                             |           |     |     |     |     |     |                        |       |    |            |                    |                             |
|------------|------------------------------------------------------------------------------------------------------------|-----------|--------------|-------------------------|-----|----------|-----|-----|-----|------------------------|----|---|-------------------------|--------------------|-----------------------------|-----------|-----|-----|-----|-----|-----|------------------------|-------|----|------------|--------------------|-----------------------------|
|            |                                                                                                            |           |              | Analysis                |     |          |     |     |     | Technical replicate CV |    |   | Biological              | Fold change (mean) | Unadjusted p-value (t-test) | Analysis  |     |     |     |     |     | Technical replicate CV |       |    | Biological | Fold change (mean) | Unadjusted p-value (t-test) |
|            |                                                                                                            |           |              | 1.1                     | 1.2 | 2.1      | 2.2 | 3.1 | 3.2 | 1                      | 2  | 3 |                         |                    |                             | CV        | 1.1 | 1.2 | 2.1 | 2.2 | 3.1 | 3.2                    | 1     | 2  |            |                    |                             |
| X5D927     | Cytochrome c oxidase subunit 1                                                                             | COX1      | 1.00         |                         |     | -4.02138 |     | NA  | NA  | NA                     | NA |   | -4.02                   | NA                 |                             |           |     |     |     |     |     |                        | -1.89 | NA |            |                    |                             |
| P02790     | Hemopexin                                                                                                  | HPX       | 1.00         |                         |     | 1.191133 |     | NA  | NA  | NA                     | NA |   | 1.19                    | NA                 |                             | 1.33948   | NA  | NA  | NA  | NA  | NA  | NA                     | 1.34  | NA |            |                    |                             |
| P05937     | Calbindin                                                                                                  | CALB1     | 1.00         |                         |     | 0.16313  |     | NA  | NA  | NA                     | NA |   | 0.16                    | NA                 |                             | -0.38091  | NA  | NA  | NA  | NA  | NA  | NA                     | -0.38 | NA |            |                    |                             |
| P22307     | Non-specific lipid-transfer protein                                                                        | SCP2      | 5.00         |                         |     | 0.595664 |     | NA  | NA  | NA                     | NA |   | 0.60                    | NA                 |                             | 0.422823  | NA  | NA  | NA  | NA  | NA  | NA                     | 0.42  | NA |            |                    |                             |
| P61457     | Pterin-4-alpha-carbinolamine dehydratase                                                                   | PCBD1     | 3.00         |                         |     | -0.13079 |     | NA  | NA  | NA                     | NA |   | -0.13                   | NA                 |                             | 0.094827  | NA  | NA  | NA  | NA  | NA  | NA                     | 0.09  | NA |            |                    |                             |
| Q3KQV9     | UDP-N-acetylhexosamine pyrophosphorylase-like protein 1                                                    | UAP1L1    | 1.00         |                         |     | -0.72728 |     | NA  | NA  | NA                     | NA |   | -0.73                   | NA                 |                             | -0.63493  | NA  | NA  | NA  | NA  | NA  | NA                     | -0.63 | NA |            |                    |                             |
| Q8U442     | Polydendrin-binding protein 2                                                                              | P4ABPN1   | 2.00         |                         |     | -1.39218 |     | NA  | NA  | NA                     | NA |   | -1.39                   | NA                 |                             | -1.43524  | NA  | NA  | NA  | NA  | NA  | NA                     | -1.44 | NA |            |                    |                             |
| Q8N2C7     | Protein unc-80 homolog                                                                                     | UNC80     | 1.00         |                         |     | 3.025941 |     | NA  | NA  | NA                     | NA |   | 3.03                    | NA                 |                             | 3.782556  | NA  | NA  | NA  | NA  | NA  | NA                     | 3.78  | NA |            |                    |                             |
| Q8N7X1     | RNA-binding motif protein 3, linc-like-3                                                                   | RBMXL3    | 1.00         |                         |     | 0.140998 |     | NA  | NA  | NA                     | NA |   | 0.14                    | NA                 |                             | -1.30742  | NA  | NA  | NA  | NA  | NA  | NA                     | -1.31 | NA |            |                    |                             |
| Q8TDZ2     | Protein-methionine sulfoxide oxidase MICAL1                                                                | MICAL1    | 1.00         |                         |     | 0.272486 |     | NA  | NA  | NA                     | NA |   | 0.27                    | NA                 |                             | -0.32986  | NA  | NA  | NA  | NA  | NA  | NA                     | -0.33 | NA |            |                    |                             |
| Q96CS3     | FAS-associated factor 2                                                                                    | FAF2      | 2.00         |                         |     | 0.035009 |     | NA  | NA  | NA                     | NA |   | 0.04                    | NA                 |                             | 0.312094  | NA  | NA  | NA  | NA  | NA  | NA                     | 0.31  | NA |            |                    |                             |
| Q9H2D6     | TRIO and F-actin-binding protein                                                                           | TRIOBP    | 1.00         |                         |     | 0.460988 |     | NA  | NA  | NA                     | NA |   | 0.46                    | NA                 |                             | 0.572989  | NA  | NA  | NA  | NA  | NA  | NA                     | 0.57  | NA |            |                    |                             |
| Q9H444     | Charged multivesicular body protein 4b                                                                     | CHMP4B    | 1.00         |                         |     | 1.026113 |     | NA  | NA  | NA                     | NA |   | 1.03                    | NA                 |                             | 0.635021  | NA  | NA  | NA  | NA  | NA  | NA                     | 0.64  | NA |            |                    |                             |
| A0A024R2M6 | Acetyl-Coenzyme A acyltransferase 1 (Peroxisomal 3-oxoacyl-Coenzyme A thiolase), isoform CRA_a             | ACAA1     | 2.00         |                         |     | -0.46691 |     | NA  | NA  | NA                     | NA |   | -0.47                   | NA                 |                             | -0.95341  | NA  | NA  | NA  | NA  | NA  | NA                     | -0.95 | NA |            |                    |                             |
| A0A024R7A8 | Aldo-keto reductase family 1, member B1 (Aldose reductase), isoform CRA_a                                  | AKR1B1    | 3.00         |                         |     | 0.626053 |     | NA  | NA  | NA                     | NA |   | 0.63                    | NA                 |                             | 0.104861  | NA  | NA  | NA  | NA  | NA  | NA                     | 0.10  | NA |            |                    |                             |
| A0A024R9P3 | HECT, UBA, and WWF domain containing 1, isoform CRA_a                                                      | HUIE1     | 1.00         |                         |     | 1.836441 |     | NA  | NA  | NA                     | NA |   | 1.84                    | NA                 |                             | 0.549022  | NA  | NA  | NA  | NA  | NA  | NA                     | 0.55  | NA |            |                    |                             |
| A0A024R4B2 | Calpastatin, isoform CRA_a                                                                                 | CST       | 2.00         |                         |     | -0.48109 |     | NA  | NA  | NA                     | NA |   | -0.48                   | NA                 |                             | -0.417732 | NA  | NA  | NA  | NA  | NA  | NA                     | -0.42 | NA |            |                    |                             |
| A0A024RDE8 | PDZ and LIM domain 5, isoform CRA_c                                                                        | PDLIM5    | 3.00         |                         |     | 0.44793  |     | NA  | NA  | NA                     | NA |   | 0.45                    | NA                 |                             | 0.18344   | NA  | NA  | NA  | NA  | NA  | NA                     | 0.18  | NA |            |                    |                             |
| A0A087WZE4 | Spectrin alpha, erythrocytic 1                                                                             | SPTA1     | 3.00         |                         |     | -0.04753 |     | NA  | NA  | NA                     | NA |   | -0.05                   | NA                 |                             | 0.142522  | NA  | NA  | NA  | NA  | NA  | NA                     | 0.14  | NA |            |                    |                             |
| AK83K1     | cDNA FLJ78096, highly similar to Homo sapiens actin, alpha, cardiac muscle (ACTC), mRNA                    | NA        | 25.00        |                         |     | 0.762914 |     | NA  | NA  | NA                     | NA |   | 0.76                    | NA                 |                             | 0.09289   | NA  | NA  | NA  | NA  | NA  | NA                     | 0.09  | NA |            |                    |                             |
| B2R655     | UMP-CMP kinase                                                                                             | CMPK      | 2.00         |                         |     | -0.99923 |     | NA  | NA  | NA                     | NA |   | -1.00                   | NA                 |                             | 0.996688  | NA  | NA  | NA  | NA  | NA  | NA                     | 1.00  | NA |            |                    |                             |
| B2R8A2     | cDNA, FLJ93804, highly similar to Homo sapiens gp25L2 protein (HSGP25L2G), mRNA                            | NA        | 2.00         |                         |     | -0.23717 |     | NA  | NA  | NA                     | NA |   | -0.24                   | NA                 |                             | 0.089396  | NA  | NA  | NA  | NA  | NA  | NA                     | 0.09  | NA |            |                    |                             |
| B2R919     | cDNA, FLJ94551                                                                                             | NA        | 1.00         |                         |     | 0.100752 |     | NA  | NA  | NA                     | NA |   | 0.10                    | NA                 |                             | 0.257441  | NA  | NA  | NA  | NA  | NA  | NA                     | 0.26  | NA |            |                    |                             |
| B3KP20     | cDNA FLJ2485 fs, clone SKNMC2001596, highly similar to Ankyrin repeat and FYVE domain-containing protein 1 | NA        | 1.00         |                         |     | -1.70068 |     | NA  | NA  | NA                     | NA |   | -1.70                   | NA                 |                             | 0.2346    | NA  | NA  | NA  | NA  | NA  | NA                     | 0.23  | NA |            |                    |                             |
| B3KZ77     | cDNA FLJ40986 fs, clone UTERU2014898, highly similar to Vacuolar ATP synthase subunit H (EC 3.6.3.14)      | NA        | 2.00         |                         |     | -0.00119 |     | NA  | NA  | NA                     | NA |   | 0.00                    | NA                 |                             | 0.115207  | NA  | NA  | NA  | NA  | NA  | NA                     | 0.12  | NA |            |                    |                             |
| B4DBD9     | cDNA FLJ56339, highly similar to Signal peptidase complex subunit 2 (EC 3.4.-.-)                           | NA        | 1.00         |                         |     | -1.05797 |     | NA  | NA  | NA                     | NA |   | -1.06                   | NA                 |                             | -0.08957  | NA  | NA  | NA  | NA  | NA  | NA                     | -0.09 | NA |            |                    |                             |
| B4DEX8     | S-adenosylmethionine synthase                                                                              | MAT2A     | 2.00         |                         |     | 0.38488  |     | NA  | NA  | NA                     | NA |   | 0.38                    | NA                 |                             | 0.001654  | NA  | NA  | NA  | NA  | NA  | NA                     | 0.00  | NA |            |                    |                             |
| B4DJU4     | cDNA FLJ53344, highly similar to Splicing factor 1                                                         | NA        | 2.00         |                         |     | 0.341519 |     | NA  | NA  | NA                     | NA |   | 0.34                    | NA                 |                             | -0.77121  | NA  | NA  | NA  | NA  | NA  | NA                     | -0.77 | NA |            |                    |                             |
| B4DSO5     | cDNA FLJ53608, highly similar to Protein transport protein Sec23A                                          | NA        | 1.00         |                         |     | -0.54512 |     | NA  | NA  | NA                     | NA |   | -0.55                   | NA                 |                             | -0.23069  | NA  | NA  | NA  | NA  | NA  | NA                     | -0.23 | NA |            |                    |                             |
| B4DWL1     | cDNA FLJ59240, highly similar to Far upstream element-binding protein 1                                    | NA        | 4.00         |                         |     | 0.687234 |     | NA  | NA  | NA                     | NA |   | 0.69                    | NA                 |                             | 0.776332  | NA  | NA  | NA  | NA  | NA  | NA                     | 0.78  | NA |            |                    |                             |
| B7Z768     | cDNA FLJ52138, highly similar to NADH dehydrogenase (ubiquinone) 1 alpha subcomplex subunit 8 (EC 1.6 NA)  | NA        | 1.00         |                         |     | -0.27219 |     | NA  | NA  | NA                     | NA |   | -0.27                   | NA                 |                             | 0.288924  | NA  | NA  | NA  | NA  | NA  | NA                     | 0.29  | NA |            |                    |                             |
| B7Z9A0     | cDNA FLJ56212, highly similar to Gelsolin                                                                  | NA        | 12.00        |                         |     | 0.145292 |     | NA  | NA  | NA                     | NA |   | 0.15                    | NA                 |                             | 0.415865  | NA  | NA  | NA  | NA  | NA  | NA                     | 0.42  | NA |            |                    |                             |
| C1PH4Z     | Kinesin-like protein                                                                                       | KIF5B-ALK | 3.00         |                         |     | -0.5669  |     | NA  | NA  | NA                     | NA |   | -0.57                   | NA                 |                             | 0.122633  | NA  | NA  | NA  | NA  | NA  | NA                     | 0.12  | NA |            |                    |                             |
| D6R6G1     | Septin 11, isoform CRA_b                                                                                   | SEPT11    | 2.00         |                         |     | -0.35184 |     | NA  | NA  | NA                     | NA |   | -0.35                   | NA                 |                             | -0.16291  | NA  | NA  | NA  | NA  | NA  | NA                     | -0.16 | NA |            |                    |                             |
| E9PDG8     | Claudin coat assembly protein AP180                                                                        | SNAP91    | 2.00         |                         |     | -0.64388 |     | NA  | NA  | NA                     | NA |   | -0.64                   | NA                 |                             | -1.37876  | NA  | NA  | NA  | NA  | NA  | NA                     | -1.38 | NA |            |                    |                             |
| F5H579     | Probable cysteine--TRNA ligase, mitochondrial (Fragment)                                                   | CARS2     | 1.00         |                         |     | -1.43727 |     | NA  | NA  | NA                     | NA |   | -1.44                   | NA                 |                             | -0.80911  | NA  | NA  | NA  | NA  | NA  | NA                     | -0.81 | NA |            |                    |                             |
| G3V1D3     | Dipeptidyl peptidase 3                                                                                     | DPP3      | 2.00         |                         |     | 0.484059 |     | NA  | NA  | NA                     | NA |   | 0.48                    | NA                 |                             | 0.241613  | NA  | NA  | NA  | NA  | NA  | NA                     | 0.24  | NA |            |                    |                             |
| H3BRU6     | Poly(rC)-binding protein 2 (Fragment)                                                                      | PCBP2     | 4.00         |                         |     | 0.144407 |     | NA  | NA  | NA                     | NA |   | 0.14                    | NA                 |                             | 0.231081  | NA  | NA  | NA  | NA  | NA  | NA                     | 0.23  | NA |            |                    |                             |
| H3BU49     | ADP-ribosylation factor-like protein 2-binding protein                                                     | ARL2BP    | 1.00         |                         |     | 0.059227 |     | NA  | NA  | NA                     | NA |   | 0.06                    | NA                 |                             | -0.39961  | NA  | NA  | NA  | NA  | NA  | NA                     | -0.40 | NA |            |                    |                             |
| H7C2W6     | Prolyl 3-hydroxylase 1 (Fragment)                                                                          | P3H1      | 1.00         |                         |     | 0.375967 |     | NA  | NA  | NA                     | NA |   | 0.38                    | NA                 |                             | 0.046992  | NA  | NA  | NA  | NA  | NA  | NA                     | 0.05  | NA |            |                    |                             |
| H7C3S9     | COP9 signalosome complex subunit 8 (Fragment)                                                              | COP8      | 1.00         |                         |     | 1.324875 |     | NA  | NA  | NA                     | NA |   | 1.32                    | NA                 |                             | 0.509296  | NA  | NA  | NA  | NA  | NA  | NA                     | 0.50  | NA |            |                    |                             |
| I3L4A5     | Inositol polyphosphate 5-phosphatase K (Fragment)                                                          | INPP5K    | 1.00         |                         |     | -0.329   |     | NA  | NA  | NA                     | NA |   | -0.33                   | NA                 |                             | -0.46547  | NA  | NA  | NA  | NA  | NA  | NA                     | -0.47 | NA |            |                    |                             |
| IGOKL3     | Septin 4                                                                                                   | SEPT4     | 1.00         |                         |     | -1.14081 |     | NA  | NA  | NA                     | NA |   | -1.14                   | NA                 |                             | -0.66019  | NA  | NA  | NA  | NA  | NA  | NA                     | -0.66 | NA |            |                    |                             |
| K7ESP4     | Dehydrophosphatase kinase domain-containing protein (Fragment)                                             | DCADK     | 1.00         |                         |     | 0.751916 |     | NA  | NA  | NA                     | NA |   | 0.75                    | NA                 |                             | 0.339153  | NA  | NA  | NA  | NA  | NA  | NA                     | 0.34  | NA |            |                    |                             |
| Q0VGD6     | HNRPR protein (Fragment)                                                                                   | HNRPR     | 3.00         |                         |     | -1.90906 |     | NA  | NA  | NA                     | NA |   | -1.91                   | NA                 |                             | -0.7495   | NA  | NA  | NA  | NA  | NA  | NA                     | -0.75 | NA |            |                    |                             |
| Q13747     | Alpha-1 antitrypsin (Fragment)                                                                             | NA        | 1.00         |                         |     | -1.17999 |     | NA  | NA  | NA                     | NA |   | -1.18                   | NA                 |                             | -2.03368  | NA  | NA  | NA  | NA  | NA  | NA                     | -2.03 | NA |            |                    |                             |
| Q32XH3     | Ribosomal protein L18a-like protein                                                                        | NA        | 1.00         |                         |     | 0.708605 |     | NA  | NA  | NA                     | NA |   | 0.71                    | NA                 |                             | 1.19586   | NA  | NA  | NA  | NA  | NA  | NA                     | 1.20  | NA |            |                    |                             |
| Q59FV6     | ARP3 actin-related protein 3 homolog variant (Fragment)                                                    | NA        | 3.00         |                         |     | -0.69434 |     | NA  | NA  | NA                     | NA |   | -0.69                   | NA                 |                             | 0.270871  | NA  | NA  | NA  | NA  | NA  | NA                     | 0.27  | NA |            |                    |                             |
| Q59GX6     | DEAD/H (Asp-Glu-Ala-Asp/His) box polypeptide 3 variant (Fragment)                                          | NA        | 2.00         |                         |     | 0.720701 |     | NA  | NA  | NA                     | NA |   | 0.72                    | NA                 |                             | -0.67431  | NA  | NA  | NA  | NA  | NA  | NA                     | -0.67 | NA |            |                    |                             |
| Q63HL5     | Putative uncharacterized protein DKFZp686G12235                                                            | NA        | 2.00         |                         |     | -0.27591 |     | NA  | NA  | NA                     | NA |   | -0.28                   | NA                 |                             | 0.204768  | NA  | NA  | NA  | NA  | NA  | NA                     | 0.20  | NA |            |                    |                             |
| Q64WB3     | Putative uncharacterized protein DKFZp686E191                                                              | NA        | 1.00         |                         |     | -0.16033 |     | NA  | NA  | NA                     | NA |   | -0.16                   | NA                 |                             | -0.73462  | NA  | NA  | NA  | NA  | NA  | NA                     | -0.73 | NA |            |                    |                             |
| Q64Z48     | US-116KD protein                                                                                           | US116KD   | 2.00         |                         |     | 0.057079 |     | NA  | NA  | NA                     | NA |   | 0.06                    | NA                 |                             | -0.26035  | NA  | NA  | NA  | NA  | NA  | NA                     | -0.26 | NA |            |                    |                             |
| Q67T07     | cDNA FLJ4352 fs, clone TRACH3006412, highly similar to Homo sapiens COP9 constitutive photomorphog         | NA        | 1.00         |                         |     | -1.65243 |     | NA  | NA  | NA                     | NA |   | -1.65                   | NA                 |                             | -0.87889  | NA  | NA  | NA  | NA  | NA  | NA                     | -0.88 | NA |            |                    |                             |
| Q724W5     | RNA helicase                                                                                               | NA        | 1.00         |                         |     | 0.556849 |     | NA  | NA  | NA                     | NA |   | 0.56                    | NA                 |                             | 0.384369  | NA  | NA  | NA  | NA  | NA  | NA                     | 0.38  | NA |            |                    |                             |
| Q8NHX0     | Mitogen-activated protein kinase                                                                           | NA        | 2.00         |                         |     | 0.284472 |     | NA  | NA  | NA                     | NA |   | 0.28                    | NA                 |                             | -0.16291  | NA  | NA  | NA  | NA  | NA  | NA                     | -0.16 | NA |            |                    |                             |
| Q8TBR3     | Fusion (Involved in t(12;16) in malignant liposarcoma)                                                     | FUS       | 1.00         |                         |     | -1.00231 |     | NA  | NA  | NA                     | NA |   | -1.00                   | NA                 |                             | -0.57302  | NA  | NA  | NA  | NA  | NA  | NA                     | -     |    |            |                    |                             |

| UniProt | Protein name                                                                                                 | Gene name      | Peptide mean | 08/017 hESC-RPE to hRPE |     |     |     |     |          |                        |    |    |            |                    | 08/023 hESC-RPE to hRPE     |          |     |     |     |          |     |                        |    |    |            |                    |                             |  |       |    |
|---------|--------------------------------------------------------------------------------------------------------------|----------------|--------------|-------------------------|-----|-----|-----|-----|----------|------------------------|----|----|------------|--------------------|-----------------------------|----------|-----|-----|-----|----------|-----|------------------------|----|----|------------|--------------------|-----------------------------|--|-------|----|
|         |                                                                                                              |                |              | Analysis                |     |     |     |     |          | Technical replicate CV |    |    | Biological | Fold change (mean) | Unadjusted p-value (t-test) | Analysis |     |     |     |          |     | Technical replicate CV |    |    | Biological | Fold change (mean) | Unadjusted p-value (t-test) |  |       |    |
|         |                                                                                                              |                |              | 1.1                     | 1.2 | 2.1 | 2.2 | 3.1 | 3.2      | 1                      | 2  | 3  | CV         |                    |                             | 1.1      | 1.2 | 2.1 | 2.2 | 3.1      | 3.2 | 1                      | 2  | 3  | CV         |                    |                             |  |       |    |
| A1KY36  | Cell proliferation-inducing protein 41                                                                       | NA             | 1.00         |                         |     |     |     |     | 0.934145 | NA                     | NA | NA | NA         | 0.93               | NA                          |          |     |     |     | 0.549014 | NA  | NA                     | NA | NA |            |                    |                             |  | 0.55  | NA |
| A4D275  | Actin related protein 2/3 complex, subunit 1B, 41kDa                                                         | ARPC1B         | 2.00         |                         |     |     |     |     | 1.051299 | NA                     | NA | NA | NA         | 1.05               | NA                          |          |     |     |     | 0.91694  | NA  | NA                     | NA | NA |            |                    |                             |  | 0.92  | NA |
| A8K8A6  | cDNA FLJ76931, highly similar to Homo sapiens testes-specific heterogenous nuclear ribonucleoprotein G-1NA   |                | 1.00         |                         |     |     |     |     | 0.081065 | NA                     | NA | NA | NA         | 0.08               | NA                          |          |     |     |     | -0.41215 | NA  | NA                     | NA | NA |            |                    |                             |  | -0.41 | NA |
| A8KA05  | cDNA FLJ77404, highly similar to Homo sapiens small nuclear ribonucleoprotein 70kDa polypeptide (RNP A NA)   |                | 1.00         |                         |     |     |     |     | 0.305555 | NA                     | NA | NA | NA         | 0.31               | NA                          |          |     |     |     | 0.334526 | NA  | NA                     | NA | NA |            |                    |                             |  | 0.33  | NA |
| B2R659  | cDNA, FLJ93097, highly similar to Homo sapiens low density lipoprotein receptor-related protein associate NA |                | 1.00         |                         |     |     |     |     | -0.13347 | NA                     | NA | NA | NA         | -0.13              | NA                          |          |     |     |     | 0.423736 | NA  | NA                     | NA | NA |            |                    |                             |  | 0.42  | NA |
| B2R984  | cDNA, FLJ94268, highly similar to Homo sapiens histone 1, H1e (HIST1H1E), mRNA                               |                | 13.00        |                         |     |     |     |     | -0.48413 | NA                     | NA | NA | NA         | -0.48              | NA                          |          |     |     |     | -1.43744 | NA  | NA                     | NA | NA |            |                    |                             |  | -1.44 | NA |
| B2R985  | cDNA, FLJ94440, highly similar to Homo sapiens chaperonin containing TCP1, subunit 6A (beta 1)(CTC6A), mRNA  |                | 9.00         |                         |     |     |     |     | -0.95620 | NA                     | NA | NA | NA         | -0.96              | NA                          |          |     |     |     | -0.57701 | NA  | NA                     | NA | NA |            |                    |                             |  | -0.52 | NA |
| B2R947  | cDNA, FLJ95399, highly similar to Homo sapiens adenosine monophosphate deaminase 2 (isoform L)(AMPD NA)      |                | 1.00         |                         |     |     |     |     | 0.220898 | NA                     | NA | NA | NA         | 0.22               | NA                          |          |     |     |     | 0.07234  | NA  | NA                     | NA | NA |            |                    |                             |  | 0.07  | NA |
| B3K0H1  | cDNA FLR0452 fcs, clone NT2RP3001475, highly similar to Splicing factor 3B subunit 3                         |                | 2.00         |                         |     |     |     |     | 0.555936 | NA                     | NA | NA | NA         | 0.56               | NA                          |          |     |     |     | -0.06581 | NA  | NA                     | NA | NA |            |                    |                             |  | -0.07 | NA |
| B3K1P9  | cDNA FLJ38578 fcs, clone HCHON2007674, highly similar to NUCLEOLIN                                           |                | 11.00        |                         |     |     |     |     | -0.14577 | NA                     | NA | NA | NA         | -0.15              | NA                          |          |     |     |     | -0.2815  | NA  | NA                     | NA | NA |            |                    |                             |  | -0.28 | NA |
| B3KUI4  | cDNA FLJ39967 fcs, clone SPLNE2027488, highly similar to Homo sapiens family with sequence similarity 82 NA  |                | 1.00         |                         |     |     |     |     | -0.64123 | NA                     | NA | NA | NA         | -0.64              | NA                          |          |     |     |     | -0.47474 | NA  | NA                     | NA | NA |            |                    |                             |  | -0.47 | NA |
| B4DDN7  | cDNA FLJ59839, highly similar to Homo sapiens biglycan (BGN), mRNA                                           |                | 1.00         |                         |     |     |     |     | 1.521497 | NA                     | NA | NA | NA         | 1.52               | NA                          |          |     |     |     | 1.33019  | NA  | NA                     | NA | NA |            |                    |                             |  | 1.33  | NA |
| B4DE59  | cDNA FLJ60424, highly similar to Junction plakoglobin                                                        |                | 6.00         |                         |     |     |     |     | 0.956457 | NA                     | NA | NA | NA         | 0.96               | NA                          |          |     |     |     | 0.952002 | NA  | NA                     | NA | NA |            |                    |                             |  | 0.95  | NA |
| B4DFR2  | cDNA FLJ59194, moderately similar to Dynein light chain 2A, cytoplasmic                                      |                | 1.00         |                         |     |     |     |     | -0.30113 | NA                     | NA | NA | NA         | -0.30              | NA                          |          |     |     |     | -0.24147 | NA  | NA                     | NA | NA |            |                    |                             |  | -0.24 | NA |
| B4DI21  | Ermin                                                                                                        | ERMN           | 1.00         |                         |     |     |     |     | 0.226828 | NA                     | NA | NA | NA         | 0.23               | NA                          |          |     |     |     | -0.20844 | NA  | NA                     | NA | NA |            |                    |                             |  | -0.21 | NA |
| B4DPP9  | cDNA FLJ51032, highly similar to CD9 antigen                                                                 |                | 1.00         |                         |     |     |     |     | -0.14639 | NA                     | NA | NA | NA         | -0.15              | NA                          |          |     |     |     | -1.03171 | NA  | NA                     | NA | NA |            |                    |                             |  | -1.03 | NA |
| B4DMW1  | cDNA FLJ57622, highly similar to Clusterin                                                                   |                | 1.00         |                         |     |     |     |     | 0.130059 | NA                     | NA | NA | NA         | 0.13               | NA                          |          |     |     |     | 0.660219 | NA  | NA                     | NA | NA |            |                    |                             |  | 0.66  | NA |
| B4E2ZA  | Eukaryotic translation initiation factor 3 subunit C                                                         | EIF3C          | 1.00         |                         |     |     |     |     | 0.807275 | NA                     | NA | NA | NA         | 0.81               | NA                          |          |     |     |     | -0.67929 | NA  | NA                     | NA | NA |            |                    |                             |  | -0.68 | NA |
| B4E304  | cDNA FLJ53962, highly similar to AP-2 complex subunit mu-1                                                   |                | 1.00         |                         |     |     |     |     | 0.233455 | NA                     | NA | NA | NA         | 0.23               | NA                          |          |     |     |     | -0.65515 | NA  | NA                     | NA | NA |            |                    |                             |  | -0.66 | NA |
| B7Z238  | cDNA FLJ55839, highly similar to Bcl-2 like 13 protein                                                       |                | 4.00         |                         |     |     |     |     | -0.06771 | NA                     | NA | NA | NA         | -0.07              | NA                          |          |     |     |     | 0.208084 | NA  | NA                     | NA | NA |            |                    |                             |  | 0.21  | NA |
| B7Z2V8  | cDNA FLJ54958, highly similar to Rap1 GTPase-GDP dissociation stimulator 1                                   |                | 2.00         |                         |     |     |     |     | -3.42259 | NA                     | NA | NA | NA         | -3.42              | NA                          |          |     |     |     | -1.62545 | NA  | NA                     | NA | NA |            |                    |                             |  | -1.63 | NA |
| B7Z9F3  | cDNA, FLJ78817, highly similar to Metaxin-2                                                                  |                | 1.00         |                         |     |     |     |     | 1.323624 | NA                     | NA | NA | NA         | 1.32               | NA                          |          |     |     |     | 0.751557 | NA  | NA                     | NA | NA |            |                    |                             |  | 0.75  | NA |
| D6REX3  | Protein transport protein Sec31A                                                                             | SEC31A         | 2.00         |                         |     |     |     |     | 0.891127 | NA                     | NA | NA | NA         | 0.89               | NA                          |          |     |     |     | 0.627194 | NA  | NA                     | NA | NA |            |                    |                             |  | 0.63  | NA |
| ESRGS4  | Prefoldin subunit 1                                                                                          | PFDM1          | 1.00         |                         |     |     |     |     | 0.416874 | NA                     | NA | NA | NA         | 0.42               | NA                          |          |     |     |     | 0.064991 | NA  | NA                     | NA | NA |            |                    |                             |  | 0.06  | NA |
| EPRN2   | Terminal uridylyltransferase 4 (Fragment)                                                                    | ZCC1C11        | 1.00         |                         |     |     |     |     | 1.852435 | NA                     | NA | NA | NA         | 1.85               | NA                          |          |     |     |     | 3.053175 | NA  | NA                     | NA | NA |            |                    |                             |  | 3.05  | NA |
| EPR9R7  | UBX domain-containing protein 1                                                                              | UBXN1          | 2.00         |                         |     |     |     |     | 1.054705 | NA                     | NA | NA | NA         | 1.05               | NA                          |          |     |     |     | 1.058838 | NA  | NA                     | NA | NA |            |                    |                             |  | 1.06  | NA |
| F4ZM63  | NF45                                                                                                         |                | 2.00         |                         |     |     |     |     | 0.644558 | NA                     | NA | NA | NA         | 0.64               | NA                          |          |     |     |     | 0.732999 | NA  | NA                     | NA | NA |            |                    |                             |  | 0.73  | NA |
| F8W1D1  | Melanocyte protein PMEL (Fragment)                                                                           | PMEL           | 2.00         |                         |     |     |     |     | 0.979791 | NA                     | NA | NA | NA         | 0.98               | NA                          |          |     |     |     | 0.579851 | NA  | NA                     | NA | NA |            |                    |                             |  | 0.58  | NA |
| G3VIC3  | Apoptosis inhibitor 5                                                                                        | API5           | 2.00         |                         |     |     |     |     | 0.810985 | NA                     | NA | NA | NA         | 0.81               | NA                          |          |     |     |     | 0.627609 | NA  | NA                     | NA | NA |            |                    |                             |  | 0.63  | NA |
| H0YC42  | Uncharacterized protein                                                                                      | NA             | 3.00         |                         |     |     |     |     | 2.135698 | NA                     | NA | NA | NA         | 2.14               | NA                          |          |     |     |     | 1.715243 | NA  | NA                     | NA | NA |            |                    |                             |  | 1.72  | NA |
| H7BY53  | EF-hand calcium-binding domain-containing protein 2 (Fragment)                                               | EFCAB2         | 1.00         |                         |     |     |     |     | 2.144899 | NA                     | NA | NA | NA         | 2.14               | NA                          |          |     |     |     | 2.500503 | NA  | NA                     | NA | NA |            |                    |                             |  | 2.50  | NA |
| I1SRC5  | UBE2L3/KRAS fusion protein                                                                                   | NA             | 3.00         |                         |     |     |     |     | -0.223   | NA                     | NA | NA | NA         | -0.22              | NA                          |          |     |     |     | -1.09342 | NA  | NA                     | NA | NA |            |                    |                             |  | -1.09 | NA |
| I3LDM9  | Transcription elongation factor B polypeptide 2 (Fragment)                                                   | TCEB2          | 1.00         |                         |     |     |     |     | -0.47369 | NA                     | NA | NA | NA         | -0.47              | NA                          |          |     |     |     | -0.80645 | NA  | NA                     | NA | NA |            |                    |                             |  | -0.81 | NA |
| I3L170  | Microtubule-associated protein                                                                               | MAPT           | 1.00         |                         |     |     |     |     | 0.845688 | NA                     | NA | NA | NA         | 0.85               | NA                          |          |     |     |     | 1.325328 | NA  | NA                     | NA | NA |            |                    |                             |  | 1.33  | NA |
| J3KN16  | Proteasome-associated protein ECM29 homolog                                                                  | KIAA0368       | 1.00         |                         |     |     |     |     | -0.15817 | NA                     | NA | NA | NA         | -0.16              | NA                          |          |     |     |     | -0.03675 | NA  | NA                     | NA | NA |            |                    |                             |  | -0.04 | NA |
| J3ORC4  | 60S ribosomal protein L26 (Fragment)                                                                         | RPL26          | 1.00         |                         |     |     |     |     | 0.814767 | NA                     | NA | NA | NA         | 0.81               | NA                          |          |     |     |     | 0.828803 | NA  | NA                     | NA | NA |            |                    |                             |  | 0.83  | NA |
| K7N7A8  | Uncharacterized protein (Fragment)                                                                           | NA             | 2.00         |                         |     |     |     |     | 0.548128 | NA                     | NA | NA | NA         | 0.55               | NA                          |          |     |     |     | 0.538587 | NA  | NA                     | NA | NA |            |                    |                             |  | 0.54  | NA |
| O15451  | Proline and glutamic acid rich nuclear protein isoform (Fragment)                                            | NA             | 1.00         |                         |     |     |     |     | 6.021562 | NA                     | NA | NA | NA         | 6.02               | NA                          |          |     |     |     | 6.149519 | NA  | NA                     | NA | NA |            |                    |                             |  | 6.15  | NA |
| Q4W5K9  | Putative uncharacterized protein LIM (Fragment)                                                              | LIM            | 2.00         |                         |     |     |     |     | 0.287141 | NA                     | NA | NA | NA         | 0.29               | NA                          |          |     |     |     | 0.868511 | NA  | NA                     | NA | NA |            |                    |                             |  | 0.87  | NA |
| Q53F45  | Splicing factor, arginine/serine-rich 4 variant (Fragment)                                                   |                | 2.00         |                         |     |     |     |     | 0.106492 | NA                     | NA | NA | NA         | 0.11               | NA                          |          |     |     |     | -0.17905 | NA  | NA                     | NA | NA |            |                    |                             |  | -0.18 | NA |
| Q53F8   | Aldehyde dehydrogenase 6A1 variant (Fragment)                                                                |                | 2.00         |                         |     |     |     |     | -0.11636 | NA                     | NA | NA | NA         | -0.12              | NA                          |          |     |     |     | -0.04822 | NA  | NA                     | NA | NA |            |                    |                             |  | -0.05 | NA |
| Q53G70  | NADH dehydrogenase (Ubiquinone) flavoprotein 1, 51kDa variant (Fragment)                                     |                | 2.00         |                         |     |     |     |     | -1.23759 | NA                     | NA | NA | NA         | -1.24              | NA                          |          |     |     |     | -1.63806 | NA  | NA                     | NA | NA |            |                    |                             |  | -1.64 | NA |
| Q53H88  | Dynaclin 2 variant (Fragment)                                                                                |                | 3.00         |                         |     |     |     |     | -0.07483 | NA                     | NA | NA | NA         | -0.07              | NA                          |          |     |     |     | -0.99817 | NA  | NA                     | NA | NA |            |                    |                             |  | -0.99 | NA |
| Q53H7   | Dehydrogenase/reductase (SDR family) member 3 variant (Fragment)                                             |                | 1.00         |                         |     |     |     |     | 2.105671 | NA                     | NA | NA | NA         | 2.11               | NA                          |          |     |     |     | 1.631139 | NA  | NA                     | NA | NA |            |                    |                             |  | 1.63  | NA |
| Q53HV2  | Chaperonin containing TCP1, subunit 7 (Eta) variant (Fragment)                                               |                | 8.00         |                         |     |     |     |     | -0.30723 | NA                     | NA | NA | NA         | -0.31              | NA                          |          |     |     |     | -0.31148 | NA  | NA                     | NA | NA |            |                    |                             |  | -0.31 | NA |
| O58F09  | Glucosidase I                                                                                                | GCS1           | 1.00         |                         |     |     |     |     | 0.066427 | NA                     | NA | NA | NA         | 0.07               | NA                          |          |     |     |     | -0.44821 | NA  | NA                     | NA | NA |            |                    |                             |  | -0.45 | NA |
| O59EA2  | Coronin (Fragment)                                                                                           |                | 2.00         |                         |     |     |     |     | -0.72636 | NA                     | NA | NA | NA         | -0.73              | NA                          |          |     |     |     | -0.27812 | NA  | NA                     | NA | NA |            |                    |                             |  | -0.28 | NA |
| O59F19  | Ribosomal protein L12 variant (Fragment)                                                                     |                | 2.00         |                         |     |     |     |     | 0.65754  | NA                     | NA | NA | NA         | 0.66               | NA                          |          |     |     |     | 0.185294 | NA  | NA                     | NA | NA |            |                    |                             |  | 0.19  | NA |
| O59G26  | Guanine nucleotide-binding protein, beta-3 subunit variant (Fragment)                                        |                | 2.00         |                         |     |     |     |     | -0.08319 | NA                     | NA | NA | NA         | -0.08              | NA                          |          |     |     |     | 0.091556 | NA  | NA                     | NA | NA |            |                    |                             |  | 0.09  | NA |
| OSHY8   | Serine hydroxymethyltransferase                                                                              | DKFZp686P09201 | 1.00         |                         |     |     |     |     | -0.91813 | NA                     | NA | NA | NA         | -0.92              | NA                          |          |     |     |     | -1.37225 | NA  | NA                     | NA | NA | </         |                    |                             |  |       |    |

**Supplemental Table S2. Differentially expressed proteins (>2-fold difference in expression) for both hESC-RPE lines compared to hRPE presented on log2 scale.**  
**Mean number of peptides used for quantification, fold change value for each replicate analysis, mean fold change, and standard deviation shown for each protein.**  
**Upregulated proteins marked with red color and downregulated with green color.**

| UniProt    | Protein name                                                                               | Gene name | Peptide mean | OB/017 hESC-RPE to hRPE |          |          |          |          |          | Fold change (mean) | SDev       | UniProt                                                                                         | Protein name                                                                                      | Gene name | Peptide mean | OB/023 hESC-RPE to hRPE |          |          |          |          |          | Fold change (mean) | SDev |
|------------|--------------------------------------------------------------------------------------------|-----------|--------------|-------------------------|----------|----------|----------|----------|----------|--------------------|------------|-------------------------------------------------------------------------------------------------|---------------------------------------------------------------------------------------------------|-----------|--------------|-------------------------|----------|----------|----------|----------|----------|--------------------|------|
|            |                                                                                            |           |              | 1.1                     | 1.2      | 2.1      | 2.2      | 3.1      | 3.2      |                    |            |                                                                                                 |                                                                                                   |           |              | 1.1                     | 1.2      | 2.1      | 2.2      | 3.1      | 3.2      |                    |      |
|            |                                                                                            |           |              | Analysis                |          |          |          |          |          |                    |            |                                                                                                 |                                                                                                   |           |              |                         |          |          |          |          |          |                    |      |
| V9HW6      | Epididymis secretory protein LI 51                                                         | HEL-S-51  | 9.50         | 3.476174                | 3.737929 | 3.4517   | 2.645289 | 2.235296 | 1.993698 | 2.92               | 0.73       | V9HW6                                                                                           | Epididymis secretory protein LI 51                                                                | HEL-S-51  | 9.50         | 3.209785                | 3.454716 | 2.903293 | 3.241777 | 2.180797 | 2.325072 | 2.74               | 0.53 |
| Q5VY30     | Retinol binding protein 4, plasma, isoform CRA_b                                           | RBPA      | 2.50         | 2.538352                | 2.639081 | 2.639081 | 2.836986 | 2.633531 | 2.41     | 0.39               | Q5VY30     | Retinol binding protein 4, plasma, isoform CRA_b                                                | RBPA                                                                                              | 2.50      | 2.48967      | 2.525356                | 2.9325   | 2.122641 | 2.326719 | 2.47     | 0.58     |                    |      |
| A7D52      | Glutathione S-transferase pi (Fragment)                                                    | GSTP1     | 19.67        | 1.409268                | 1.127546 | 1.993092 | 1.195694 | 3.276798 | 2.89305  | 1.98               | 0.91       | P35555                                                                                          | Fibrillin-1                                                                                       | FBN1      | 25.83        | 2.635805                | 2.299556 | 2.497973 | 2.681427 | 1.935242 | 2.457065 | 2.40               | 0.29 |
| C8R512     | Caldesmon, highly similar to Homo sapiens aldehyde dehydrogenase 1 family class B member 2 | GSTT1     | 5.23         | 1.379541                | 3.081129 | 1.308082 | 1.328234 | 1.975252 | 1.934894 | 1.82               | 0.48       | CA2601                                                                                          | Caldesmon                                                                                         | CD248     | 3.00         | 2.00471                 | 2.116333 | 2.251019 | 2.436027 | 1.435651 | 2.23     | 0.53               |      |
| AD002488T0 | Integrin beta 8                                                                            | ITGB8     | 1.00         | 1.472631                | 1.594711 | 1.306225 | 2.570083 | 1.935328 | 1.80     | 0.47               | AD002483E3 | Apolipoprotein A-I, isoform CRA_a                                                               | APOA1                                                                                             | 2.33      | 2.171774     | 2.193545                | 2.158178 | 1.972059 | 2.333172 | 1.711849 | 1.83     | 0.48               |      |
| I4A87      | Macrophage migration inhibitory factor (Fragment)                                          | MIF       | 7.17         | 1.511884                | 1.464049 | 1.816903 | 1.642547 | 1.995871 | 2.328021 | 1.79               | 0.33       | G76A1A                                                                                          | CS1B protein                                                                                      | CS1B      | 3.67         | 1.634077                | 1.810028 | 1.595385 | 1.952152 | 1.727776 | 1.733579 | 1.74               | 0.13 |
| S4R371     | Fatty acid-binding protein, heart (Fragment)                                               | FABP3     | 2.25         | 2.023669                | 1.339137 | 1.878319 |          |          | 1.511072 | 1.73               | 0.39       | Q01650                                                                                          | Large neutral amino acids transporter small subunit 1                                             | SLC7A5    | 1.25         | 1.259375                |          | 1.010685 | 1.038763 | 1.584927 | 1.72     | 0.91               |      |
| P16401     | Histone H1.5                                                                               | HIST1H1B  | 5.40         | 1.29687                 | 1.619964 | 1.947181 | 1.535453 | 2.209149 | 1.72     | 0.36               | B2R2512    | cDNA, FLJ39268, highly similar to Homo sapiens aldehyde dehydrogenase 1 family, member A3 (ANA) | ANA                                                                                               | 3.33      | 1.301627     | 2.395054                | 1.348755 | 1.562839 | 1.58923  | 2.115222 | 1.72     | 0.44               |      |
| Q76A1      | CS1B protein                                                                               | CS1B      | 3.67         | 1.611166                | 1.727405 | 1.371868 | 1.357116 | 2.228004 | 2.028756 | 1.72               | 0.35       | W8ECY1                                                                                          | Lactoferrin                                                                                       | LF        | 5.00         | 1.926334                | 1.017848 |          |          | 2.163906 | 1.70     | 0.60               |      |
| Q1650      | Large neutral amino acids transporter small subunit 1                                      | SLC7A5    | 1.25         | 0.873917                | 0.873917 | 0.862326 | 2.352014 | 1.832675 | 1.71     | 1.13               | AP0C3      | Apolipoprotein C-III                                                                            | APOC3                                                                                             | 1.17      | 1.759619     | 1.640518                | 1.341283 | 1.338937 | 1.672284 | 2.405546 | 1.69     | 0.39               |      |
| AOA02483E3 | Apolipoprotein A-I, isoform CRA_a                                                          | APOA1     | 2.33         | 2.634717                | 2.317136 | 1.974767 | 2.021072 | 0.964121 | 0.421314 | 1.69               | 0.84       | D3B4A7                                                                                          | cDNA, FLJ35635, fs, clone SPLEN210185, highly similar to BONE/CARTILAGE PROTEOGLYCAN I            | NCP2      | 1.00         | 1.00                    | 1.00     | 2.094576 | 1.975248 | 0.990457 |          | 1.69               | 0.61 |
| W8EY1      | Lactoferrin                                                                                | LF        | 5.00         | 1.911673                | 1.380773 |          |          |          | 1.764742 | 1.68               | 0.27       | AAA087X02                                                                                       | Complex factor C-III                                                                              | CFI       | 1.00         | 1.834888                | 1.188535 | 1.596808 | 1.442842 | 2.369161 |          | 1.69               | 0.45 |
| B0IWI2     | Apolipoprotein C-III                                                                       | APOC3     | 1.17         | 1.848467                | 1.641181 | 1.415766 | 1.543017 | 1.125438 | 2.132865 | 1.62               | 0.35       | DSKU2E                                                                                          | Collectin-2                                                                                       | COLEC2    | 2.67         | 2.15145                 | 1.633213 | 1.202811 | 2.124668 | 1.788893 | 1.007687 | 1.65               | 0.47 |
| D8W9P      | Beta-2-glycoprotein I (Fragment)                                                           | NA        | 1.20         | 1.300894                | 1.435892 | 1.161807 | 1.952719 | 2.087996 | 1.59     | 0.41               | Q104745    | Na(+)/H(+)-exchange regulatory cofactor NHE-RF1                                                 | SLC9A3R1                                                                                          | 8.67      | 1.407596     | 1.91543                 | 1.841261 | 1.905157 | 1.435722 | 1.267986 | 1.63     | 0.29               |      |
| AA087X02   | Complex factor C-III                                                                       | CFI       | 1.00         | 1.771221                | 1.565084 | 1.074888 | 1.405785 | 2.067188 | 1.50     | 0.37               | NCCRP1     | F-box only protein 50                                                                           | NCCRP1                                                                                            | 2.33      | 2.369177     | 1.450086                | 1.052187 | 1.605343 | 0.454857 | 2.690151 | 1.60     | 0.83               |      |
| Q14682     | Structural maintenance of chromosomes protein 1A                                           | SMC1A     | 1.00         | 1.590398                |          |          | 1.530956 |          | 1.00     | 1.56               | 0.85       | O29510                                                                                          | Similar to ribosomal protein S8 (Fragment)                                                        | NA        | 1.50         | 1.83012                 | 2.733932 |          |          | 0.465579 | 1.60     | 1.60               |      |
| Q4ZK7      | F-box only protein 50                                                                      | NCCRP1    | 2.33         | 1.517464                | 1.042644 | 1.845056 | 1.644994 | 3.078895 | 2.912346 | 1.56               | 0.85       | POS787                                                                                          | Keratin, type II cytoskeletal 8                                                                   | KRT8      | 17.50        | 1.86948                 | 1.38205  | 1.650753 |          | 0.992759 | 1.810548 | 1.60               | 0.35 |
| P35555     | Fibrillin-1                                                                                | FBN1      | 25.83        | 1.607747                | 0.988756 | 1.317947 | 1.315035 | 1.849868 | 2.2249   | 1.55               | 0.44       | B2RA03                                                                                          | cDNA, FLJ94640, highly similar to Homo sapiens keratin 18 (KRT18), mRNA                           | DNA       | 9.50         |                         |          | 2.047228 |          | 1.128552 | 1.59     | 0.65               |      |
| Q86222     | Epididymis secretory protein LI 297                                                        | ADP2      | 2.67         | 1.379692                | 0.580399 | 2.143443 | 1.704767 | 1.675466 | 1.721421 | 1.53               | 0.53       | AD002488T0                                                                                      | Integrin beta 8                                                                                   | ITGB8     | 2.50         | 1.325605                | 1.081709 | 0.957238 | 2.058359 | 2.515707 | 1.59     | 0.67               |      |
| Q5J5D8     | Aquaporin 1 splice variant 2 (Fragment)                                                    | AQP1      | 1.00         | 0.841618                | 2.084512 | 2.275493 | 2.145216 | 0.309504 | 1.53     | 0.90               | Q5NKV8     | Intercellular adhesion molecule 1                                                               | ICAM1                                                                                             | 2.83      | 1.687572     | 2.235223                | 1.899633 | 1.475243 | 0.777006 | 1.448814 | 1.59     | 0.49               |      |
| B4D1W1     | cDNA FLJ52285, highly similar to Vesicular integral-membrane protein VIP36                 | VIP36     | 2.00         | 0.924949                | 0.722477 | 2.921807 |          |          | 1.52     | 1.21               | ETC9A4     | Ezrin                                                                                           | EPZ                                                                                               | 23.17     | 1.508392     | 1.961914                | 1.385111 | 1.497159 | 1.800684 | 1.332742 | 1.58     | 0.25               |      |
| PD5787     | Keratin, type II cytoskeletal 8                                                            | KRT8      | 17.50        | 1.785737                | 1.388242 | 1.527923 | 1.812191 | 0.52638  | 1.506304 | 1.51               | 0.28       | PS8107                                                                                          | Epiplakin                                                                                         | EPPLK1    | 2.50         | 1.20085                 | 1.211743 |          |          | 2.193635 | 0.918977 | 1.56               | 0.91 |
| Q10475     | Na(+)/H(+)-exchange regulatory cofactor NHE-RF1                                            | SLC9A3R1  | 8.67         | 1.385279                | 1.86852  | 1.280794 | 1.40678  | 1.46048  | 1.42337  | 1.47               | 0.20       | I4A87                                                                                           | Macrophage migration inhibitory factor (Fragment)                                                 | MIF       | 7.17         | 1.49306                 | 1.668784 | 1.451427 | 1.373144 | 1.39628  | 1.740643 | 1.51               | 0.14 |
| B2RA03     | cDNA, FLJ94640, highly similar to Homo sapiens keratin 18 (KRT18), mRNA                    | DNA       | 9.50         | 1.59447                 |          |          |          |          | 1.263141 | 1.43               | 0.23       | K7EKL3                                                                                          | Granulin (Fragment)                                                                               | GN        | 2.00         | 1.734948                | 1.469632 | 1.42867  | 1.68763  | 1.379727 | 1.314178 | 1.50               | 0.17 |
| Q9R684     | FBL protein (Fragment)                                                                     | FBL       | 1.00         | 1.378784                |          |          |          |          | 1.471612 | 1.43               | 0.07       | P30711                                                                                          | Glutathione S-transferase theta-1                                                                 | GSTT1     | 1.00         |                         |          | 0.97925  | 1.958003 |          | 1.47     | 0.69               |      |
| Q59X2      | Solute carrier family 2 (facilitated glucose transporter), member 1 variant (Fragment)     | SCL25A5   | 8.50         | 1.130076                | 1.169165 | 2.096679 | 1.639758 | 1.040796 | 1.470338 | 1.42               | 0.40       | B4D0L4                                                                                          | cDNA FLJ5396, moderately similar to Homo sapiens cytidylate kinase (CMPK), mRNA                   | NA        | 1.67         |                         |          | 1.154178 |          | 1.484754 | 1.46     | 0.29               |      |
| P17643     | 3-hydroxyindole-2-carboxylic acid oxidase                                                  | TYRBP1    | 1.00         | 1.930487                | 1.889383 | 1.032641 |          |          | 1.553711 | 1.62               | 0.44       | P193487                                                                                         | Guanine nucleotide-binding protein subunit gamma (Fragment)                                       | GABG1     | 1.00         | 2.054135                |          |          |          |          | 1.762914 | 1.33               | 0.68 |
| ET9E04     | Ezrin                                                                                      | EPZ       | 23.17        | 1.584306                | 1.904808 | 1.192397 | 1.184951 | 1.559935 | 1.02925  | 1.41               | 0.33       | AAA02483E3                                                                                      | Serpin peptidase inhibitor, clade H (heat shock protein 47), member 1, (Collagen binding protein) | SERPINH1  | 9.17         | 1.638447                | 1.764575 | 1.356564 | 1.379589 | 1.164101 | 1.465036 | 1.43               | 0.25 |
| AK85W7     | cDNA FLJ75180, highly similar to Homo sapiens mitochondrial isoleucine tRNA synthase       | DNA       | 2.00         | 2.270017                |          |          | 0.53294  |          | 1.40     | 1.23               | ESRHW4     | Erlin-2 (Fragment)                                                                              | ERL2                                                                                              | 5.33      | 1.503531     | 1.291599                | 0.742169 | 1.170511 | 1.770041 | 2.079951 | 1.43     | 0.47               |      |
| Q8N142     | Adenylosuccinate synthetase isozyme 1                                                      | ADSS1     | 5.00         | 1.800788                |          | 1.573164 | 2.225313 | 0.245973 | 1.138237 | 1.40               | 0.75       | P08127                                                                                          | Keratin, type I cytoskeletal 19                                                                   | KRT19     | 7.67         |                         |          | 1.754672 | 1.446921 | 1.08121  | 1.43     | 0.34               |      |
| Q02318     | Rera 2-hydroxylase, mitochondrial                                                          | CYP27A1   | 1.00         |                         |          | 0.934339 | 1.05775  | 1.142116 | 1.38     | 0.66               | D60664     | Perilipin-3                                                                                     | PLIN3                                                                                             | 2.00      | 1.499119     | 1.443558                |          |          | 1.600037 | 1.159648 | 1.43     | 0.19               |      |
| W6A4U0     | Tetraspanin (Fragment)                                                                     | CD63      | 1.00         | 1.745426                | 1.400538 | 1.111414 | 1.677252 | 0.98553  | 1.252385 | 1.37               | 0.39       | AAA087WV8                                                                                       | Fibrillin-2                                                                                       | FBN2      | 2.33         | 1.361267                | 1.234035 | 2.219534 | 0.574229 | 1.367344 | 1.39     | 0.82               |      |
| ESRHW4     | Erlin-2 (Fragment)                                                                         | VIP4H1    | 1.00         | 1.745426                | 1.400538 | 1.111414 | 1.677252 | 0.98553  | 1.252385 | 1.37               | 0.39       | PS5225                                                                                          | Rac1n 3 variant (Fragment)                                                                        | NA        | 6.17         | 1.510547                |          |          |          | 1.479847 | 1.442361 | 1.24               | 0.61 |
| E9PE85     | Far upstream element-binding protein 1                                                     | FUBP1     | 3.00         | 1.535059                | 0.976653 | 1.503732 | 1.750222 |          | 1.036149 | 1.36               | 0.34       | CD13C3                                                                                          | Tropomyosin beta chain                                                                            | TPM2      | 6.75         | 1.605417                |          |          |          | 1.209166 | 1.187827 | 1.37               | 0.20 |
| Q5KU26     | Collectin-2                                                                                | COLEC2    | 2.67         | 1.855229                | 1.554266 | 0.775154 | 1.569551 | 1.270517 | 0.994904 | 1.34               | 0.40       | B4E106                                                                                          | cDNA FLJ53399, highly similar to Monocarboxylate transporter 1                                    | NA        | 2.47         | 0.982141                | 1.154491 | 1.976721 |          |          |          | 1.37               | 0.53 |
| Q53GD1     | Guanine nucleotide-binding protein subunit gamma (Fragment)                                | GN        | 1.00         | 1.013519                | 1.321027 | 0.903948 | 2.089793 |          | 1.33     | 0.54               | AAA02483E3 | 3-hydroxybutyrate dehydrogenase, type 2, isoform CRA_b                                          | BHD2                                                                                              | 3.40      | 1.5323       | 1.362901                | 1.290254 |          | 1.524003 | 1.13344  | 1.37     | 0.17               |      |
| Q53C10     | Plastin 3 variant (Fragment)                                                               | NA        | 4.00         |                         | 1.724823 | 0.933138 |          |          | 1.33     | 0.56               | P49006     | MARCKS-related protein                                                                          | MARCKS1                                                                                           | 1.00      | 1.005996     | 1.169852                |          |          | 1.453849 | 1.322763 | 1.37     | 0.30               |      |
| Q8W7V5     | THOP1 protein (Fragment)                                                                   | THOP1     | 1.50         | 2.1276                  |          |          | 0.50107  |          | 1.31     | 1.15               | O25320     | Guanine nucleotide-binding protein subunit gamma (Fragment)                                     | GN                                                                                                | 1.00      | 1.245434     |                         | 1.838433 | 0.859642 | 1.478496 |          | 1.36     | 0.41               |      |
| AD002483D9 | 3-hydroxybutyrate dehydrogenase, type 2, isoform CRA_b                                     | BHD2      | 3.40         | 1.5362545               | 1.370972 | 1.134537 |          | 1.444329 | 0.962634 | 1.33               | 0.24       | CH22H8                                                                                          | Cherry tricarboxylate carrier protein 6                                                           | ALIC6     | 5.67         | 0.96944                 | 0.98003  | 1.759946 | 1.744541 | 1.898277 | 0.686664 | 1.34               | 0.52 |
| Q55882     | Caldesmon                                                                                  | CALD1     | 3.00         | 1.915068                | 1.028865 | 0.915036 | 1.723032 | 0.822859 | 1.28     | 0.50               | DM2M25     | Putative uncharacterized protein DKFZp68M09245                                                  | DKFZP68M09245                                                                                     | 2.00      | 1.423302     |                         |          |          | 1.294945 | 1.34     | 1.12     |                    |      |
| PS8107     | Epiplakin                                                                                  | EPPLK1    | 3.50         |                         |          | 1.666462 |          |          | 0.882184 | 1.27               | 0.55       | OV0DC6                                                                                          | Peptidyl-prolyl-cis-trans isomerase                                                               | PPP1R1    | 2.50         | 1.802176                |          |          |          | 0.866633 | 1.33     | 0.66               |      |
| Q9YU12     | UDP-glucose 4-epimerase                                                                    | UGTGT1    | 4.00         |                         | 0.796139 | 1.177163 |          |          | 0.420    | 1.26               | 0.65       | B4DWV1                                                                                          | cDNA FLJ52285, highly similar to Vesicular integral-membrane protein VIP36                        | NA        | 2.00         | 0.257936                | 0.023967 | 2.151521 |          |          |          | 1.33               | 1.26 |
| P53621     | Coatomer subunit alpha                                                                     | COPA      | 2.25         | 1.040852                | 1.079357 | 1.419834 |          | 0.864051 | 1.25     | 0.36               | D6F1       |                                                                                                 |                                                                                                   |           |              |                         |          |          |          |          |          |                    |      |



| UniProt      | Protein name                                                                          | Gene name | Peptide mean | 08/017 hESC-RPE to hRPE |          |          |          |          | Fold change (mean) | SDev     | UniProt | Protein name | Gene name             | Peptide mean                                                                                     | 08/023 hESC-RPE to hRPE |           |          |          |          | Fold change (mean) | SDev     |          |          |          |          |       |      |
|--------------|---------------------------------------------------------------------------------------|-----------|--------------|-------------------------|----------|----------|----------|----------|--------------------|----------|---------|--------------|-----------------------|--------------------------------------------------------------------------------------------------|-------------------------|-----------|----------|----------|----------|--------------------|----------|----------|----------|----------|----------|-------|------|
|              |                                                                                       |           |              | Analysis                |          |          |          |          |                    |          |         |              |                       |                                                                                                  | Analysis                |           |          |          |          |                    |          |          |          |          |          |       |      |
|              |                                                                                       |           |              | 1.1                     | 1.2      | 2.1      | 2.2      | 3.1      |                    |          |         |              |                       |                                                                                                  | 3.2                     | 1.1       | 1.2      | 2.1      | 2.2      |                    |          | 3.1      | 3.2      |          |          |       |      |
| Q51697       | Guanine nucleotide binding protein (G protein), alpha transducing activity polypGNAT2 | GNAT2     | 12.00        |                         | -1.53809 | -0.68951 |          |          |                    | -1.11    | 0.60    | DCXR         | 3.50                  | -0.88021                                                                                         | -1.07624                | -1.67853  | -0.57791 |          |          | -1.05              | 0.46     |          |          |          |          |       |      |
| O15257       | Serin/threonine-protein phosphatase 2A activator                                      | PPP2R4    | 2.00         |                         | -1.6915  | -0.8196  | -0.87543 |          |                    | -1.13    | 0.49    | NDUFAB8      | 4.50                  | -0.86059                                                                                         | -0.83466                | -1.31713  | -1.20666 |          |          | -1.05              | 0.24     |          |          |          |          |       |      |
| H0Y886       | NADH dehydrogenase [ubiquinone] beta subcomplex subunit 5, mitochondrialNDUF85        | NDUF85    | 1.00         |                         | 0.053477 | -1.70975 | -1.73762 |          |                    | -1.13    | 1.03    | APOD1        | 1.75                  | -1.99301                                                                                         | -0.503291               | -1.11232  | -1.6332  |          |          | -1.06              | 1.10     |          |          |          |          |       |      |
| Q04248B75    | Citrate synthase                                                                      | CS        | 14.00        |                         | -0.54852 | -0.86872 | -1.73599 | -1.76872 | -0.64944           | -1.21839 | -1.13   | 0.53         | DPFSL3                | 21.00                                                                                            | -1.15874                | -0.63427  | -1.04081 | -0.91917 | -1.1075  | -1.43201           | -1.06    | 0.26     |          |          |          |       |      |
| P68366       | Tubulin alpha-4A chain                                                                | TUBB4A    | 38.00        |                         | -1.32715 | -1       | -0.75421 | -0.2128  | -1.78633           | -1.73904 | -1.14   | 0.61         | DBTBA5                | NA                                                                                               | 0.700                   | -0.5142   | -0.70472 | -1.4876  | -1.89984 | -0.94105           | -0.8798  | -1.07    | 0.52     |          |          |       |      |
| H0Y695       | Aminomethyltransferase (Fragment)                                                     | AMT       | 13.00        |                         | -0.91348 |          | -0.90686 | -1.5994  |                    |          | -1.14   | 0.40         | D59FD4                | NA                                                                                               | 24.17                   | -1.07465  | -1.35052 | -1.25783 | -1.27953 | -0.76417           | -1.01994 | -1.07    | 0.19     |          |          |       |      |
| AA0242R4F1   | Enolase 1 (Alpha), isoform CRA_a                                                      | ENO1      | 61.00        |                         | -1.37281 | -1.39643 | -0.95869 | -0.72536 | -1.37033           | -1.23426 | -1.14   | 0.32         | GNMG7                 | 1.00                                                                                             | 0.251337                | -1.01084  | -1.96327 | -1.48629 |          |                    | -1.19612 | -1.07    | 0.82     |          |          |       |      |
| Q08722       | Leukocyte surface antigen CD47                                                        | CD47      | 23.00        |                         | -1.16168 | -1.18702 | -1.03081 | -1.11534 | -1.15083           | -1.21412 | -1.14   | 0.06         | NA                    | 5.80                                                                                             | -0.45053                | -0.335133 | -1.63151 | -0.84294 | -0.92466 | -0.74464           | -1.07    | 1.17     |          |          |          |       |      |
| B72842       | cDNA FLJ51671, highly similar to Prenylcysteine oxidase (EC 1.8.3.5)                  | NA        | 1.50         |                         |          | -1.27661 | -1.01572 |          |                    |          | -1.15   | 0.18         | D6L1E3                | NA                                                                                               | 3.00                    | -0.8373   | -0.99882 | -0.53999 | -1.13087 | -1.75437           | -0.89524 | -1.08    | 0.44     |          |          |       |      |
| Q53117       | Citrate synthase                                                                      | CS        | 2.00         |                         |          | -1.11729 |          | -1.5407  | -0.59555           | -1.3231  | -1.14   | 0.50         | B717A4                | NA                                                                                               | 3.00                    | -1.14667  | -1.14105 | -1.14105 | -1.14105 |                    |          | -1.05    | 0.44     |          |          |       |      |
| Q71136       | Tubulin alpha-1A chain                                                                | TUBA1A    | 44.00        |                         |          |          |          | -1.5407  | -0.95114           | -1.43663 | -1.06   | 0.24         | B4E192                | NA                                                                                               | 15.00                   | -1.16757  | -0.99868 | -1.1189  |          |                    |          | -1.09    | 0.09     |          |          |       |      |
| Q53Y67       | Amine oxidase [flavin-containing]                                                     | MAOA      | 3.20         |                         | -1.40165 | -1.11947 | -1.15516 | -1.17243 |                    |          | -1.17   | 0.15         | P56134                | NA                                                                                               | 3.00                    | -0.7835   | -0.353   | -1.36782 | -1.87279 |                    |          | -1.09    | 0.67     |          |          |       |      |
| Q5JM72       | Guanine nucleotide-binding protein (G $\alpha$ ) subunit alpha isoforms Xlas          | GNAS      | 4.00         |                         | -2.04093 | -1.01719 | -1.34342 |          | -0.69479           | -0.77245 | -1.17   | 0.55         | AA0242R9B7            | Cytochrome c oxidase subunit VIc, isoform CRA_a                                                  | 2.50                    | -0.91285  | -1.10661 | -1.0455  | -1.66646 | -0.69961           | -1.17325 | -1.10    | 0.32     |          |          |       |      |
| AA0242R8B18  | Retinol dehydrogenase 5 (11-cis and 9-cis), isoform CRA_a                             | RDH5      | 10.67        |                         | -1.29058 | -1.17797 | -1.12017 | -1.16887 | -1.12927           | -1.23327 | -1.19   | 0.06         | D9H3N1                | Retinol dehydrogenase membrane protein 1                                                         | 1.50                    |           |          | -0.33955 | -1.90335 |                    |          | -1.12    | 1.11     |          |          |       |      |
| Q8NF67       | cDNA FLJ40278 fs, clone NT28P1000325, highly similar to Phosphate carrier protein     | PDE6A     | 7.40         |                         | -1.15246 | -1.27156 | -2.08151 |          | -0.90513           | -0.68328 | -1.22   | 0.53         | RFHF18                | RNP24                                                                                            | 2.30                    |           |          | 0.410016 |          | -2.77714           | -1.0244  | -1.13    | 1.60     |          |          |       |      |
| P16499       | Rod cGMP-specific 3',5'-cyclic phosphodiesterase subunit alpha                        | PDE6A     | 16.67        |                         | -1.19825 | -1.05101 | -1.74993 | -1.49946 | -0.80233           | -1.02078 | -1.22   | 0.35         | Q9H9K6                | Mitochondrial glutamate carrier 1                                                                | 3.00                    |           |          | -1.69078 |          | -1.64053           |          | -1.15    | 0.54     |          |          |       |      |
| Q75475       | PC4 and SFRS1-interacting protein                                                     | PSPI1     | 2.80         |                         | -1.58496 | -1.40696 | -1.37401 | -1.01817 |                    |          | -1.22   | 0.34         | D8MWV5                | ATP synthase subunit 1, mitochondrial                                                            | 1.50                    |           |          |          |          |                    |          |          |          |          |          |       |      |
| P51991       | Heterogeneous nuclear ribonucleoprotein A3                                            | HNRNP3A3  | 5.25         |                         | -0.96942 | -1.24703 |          |          | -0.78008           | -1.90749 | -1.23   | 0.49         | P75475                | Cytochrome c oxidase subunit VIc, isoform CRA_a                                                  | 2.80                    |           |          | -2.06912 | -1.28216 | -0.7406            | -0.94285 | -0.81207 | -1.17    | 0.51     |          |       |      |
| Q53Y62       | Syntaxin 3A                                                                           | STX3A     | 3.25         |                         | -0.73513 |          | -2.27019 |          | -0.82617           | -0.68011 | -1.24   | 0.99         | AA0242R875            | Citrate synthase                                                                                 | CS                      | 7.00      |          |          | -0.57003 | -0.91011           | -1.75334 | -1.37873 | -0.886   | -1.21141 | -1.18    | 0.49  |      |
| P35613       | Basigin                                                                               | BSG       | 8.67         |                         | -2.19735 |          | -0.83417 | -0.69432 |                    |          | -1.24   | 0.83         | AA0242R9X3            | Cytosolic nucleotide gated channel alpha 1, isoform CRA_a                                        | 14.00                   |           |          |          |          |                    |          |          |          |          |          |       |      |
| P07305       | Histone H1 0                                                                          | H1FO      | 2.17         |                         | -0.22482 | -2.14108 | -0.44693 | -0.69816 | -1.0726            | -1.12142 | -1.65   | 0.69         | D48E82                | Cytochrome c oxidase subunit 7A2, mitochondrial                                                  | 2.60                    |           |          |          |          |                    |          |          |          |          |          |       |      |
| V9RH31       | ATP synthase subunit beta                                                             | ATP5B     | 65.17        |                         | -0.92464 | -0.92314 | -1.75191 | -1.9382  | -1.07407           | -0.95739 | -1.26   | 0.45         | D25E69                | Elongation factor 1-alpha 2                                                                      | 10.00                   |           |          |          |          |                    |          |          |          |          |          |       |      |
| AA0242DGE4   | Syntaxin-3 (Fragment)                                                                 | STX3      | 5.00         |                         |          |          |          | -1.626   |                    |          | -1.26   | 0.52         | P16403                | Histone H1.2                                                                                     | 14.67                   |           |          |          |          |                    |          |          |          |          |          |       |      |
| O14561       | Acyl carrier protein, mitochondrial                                                   | NDUFAB1   | 3.00         |                         | -0.76292 | -1.04238 | -1.43505 | -1.79593 |                    |          | -1.26   | 0.45         | AA0242R818            | Retinol dehydrogenase 5 (11-cis and 9-cis), isoform CRA_a                                        | 10.67                   |           |          | -1.30267 | -1.04681 | -1.53375           | -1.03603 | -0.97601 | -1.2732  | -1.19    | 0.21     |       |      |
| AA0242R7WZ17 | Mristoylated-linoleic-Rh-Kinase substrate                                             | MARCKS    | 2.50         |                         | -0.91719 | -1.39393 | -0.81213 | -1.19277 | -2.37903           | -0.90167 | -1.27   | 0.59         | D3ZCW2                | Galactinol-related protein                                                                       | 1.00                    |           |          |          |          |                    |          |          |          |          |          |       |      |
| V9WH12       | Epididymis secretory sperm binding protein L2a                                        | PROX2     | 18.50        |                         | -1.33359 | -1.41605 | -1.45672 | -1.15119 | -1.26143           | -1.10006 | -1.29   | 0.14         | V9WH31                | ATP synthase subunit beta                                                                        | 65.17                   |           |          | -0.94244 | -0.83034 | -1.933             | -2.05898 | -0.71922 | -0.6795  | -1.20    | 0.63     |       |      |
| ADND46       | Epitaxial transporter                                                                 | NA        | 5.13         |                         |          | -1.84876 | -1.78209 | -0.59183 |                    |          | -1.29   | 0.64         | ADP47                 | ADP/ATP translocase 1                                                                            | 21.00                   |           |          | -0.35221 | -0.62269 | -2.31017           | -1.79629 | -1.64128 | -1.84128 | -1.20    | 0.79     |       |      |
| Q9UNL6       | Hemoglobin gamma-2 (Fragment)                                                         | HBG2      | 11.50        |                         |          |          |          | -0.97408 |                    |          | -1.26   | 0.46         | H1FO                  | Histone H1.0                                                                                     | 11.57                   |           |          | -1.58847 | -1.29022 | -0.69564           | -0.69477 | -1.5761  | -1.44209 | -1.21    | 0.42     |       |      |
| P21912       | Succinate dehydrogenase [ubiquinone] iron-sulfur subunit, mitochondrial               | SDHB      | 1.60         |                         | -0.8077  | -1.24073 | -1.43076 | -2.39007 |                    | -0.64853 | -1.30   | 0.68         | P17568                | NADH dehydrogenase [ubiquinone] 1 beta subcomplex subunit 7                                      | 1.00                    |           |          | -1.1854  | -0.52022 | -1.49405           | -0.34662 | -2.55529 | -1.22    | 0.88     |          |       |      |
| Q4LE73       | HPRT1 protein (Fragment)                                                              | HPRT1     | 3.00         |                         | -1.16786 | -1.36187 | -1.10812 | -0.86427 | -1.90696           | -1.42905 | -1.31   | 0.36         | XSDQV1                | Collapsin response mediator protein 1, isoform B (Fragment)                                      | 10.67                   |           |          | -1.59067 |          | -0.80192           |          |          |          | -1.2701  | -1.22    | 0.40  |      |
| Q53E50       | Sodium/potassium-translocating ATPase subunit alpha (Fragment)                        | NA        | 40.67        |                         | -1.03608 | -1.23001 | -1.34544 | -1.44931 | -1.31537           | -1.49243 | -1.31   | 0.17         | P16499                | Rod cGMP-specific 3',5'-cyclic phosphodiesterase subunit alpha                                   | 16.67                   |           |          | -1.40282 | -1.90307 | -1.57236           | -1.65291 | -0.45239 | -1.37941 | -1.23    | 0.46     |       |      |
| JRKS22       | Lyxoylase reductase (Fragment)                                                        | DCXR      | 3.50         |                         | -1.83729 | -1.64099 | -1.46474 | -0.36643 |                    |          | -1.33   | 0.66         | D35E30                | Sodium/potassium-translocating ATPase subunit alpha (Fragment)                                   | 16.67                   |           |          | -1.01719 | -1.06283 | -1.25662           | -1.16291 | -0.25269 | -1.4485  | -1.24    | 0.18     |       |      |
| Q4VZ99       | ATP synthase protein                                                                  | NA        | 23.00        |                         | -1.22423 | -1.19873 | -1.13348 | -1.21643 | -1.21415           | -1.14    | 0.50    | AA0242DGE4   | Epitaxial transporter | 5.13                                                                                             |                         |           |          |          | -0.80202 |                    | -1.68419 |          |          |          |          |       |      |
| Q8I29        | Tubulin, beta 2C                                                                      | TUBB2C    | 54.83        |                         | -1.6651  | -1.64149 | -0.73776 | -0.85478 | -1.41213           | -1.67265 | -1.33   | 0.43         | Q9UNL6                | Hemoglobin gamma-G (Fragment)                                                                    | 11.50                   |           |          |          |          |                    |          |          |          |          |          |       |      |
| AA0242R461   | Heterogeneous nuclear ribonucleoprotein A2/B1, isoform CRA_c                          | HNRPA2B1  | 13.25        |                         | -1.60458 | -1.82906 |          |          | -0.84714           | -1.04741 | -1.33   | 0.46         | AA0242R875            | Enolase 1 (Alpha), isoform CRA_a                                                                 | 61.00                   |           |          | -1.14704 | -0.97358 | -1.0099            | -0.99737 | -1.23231 | -1.65954 | -1.25    | 0.35     |       |      |
| AA0242Q2T0   | Voltage-dependent anion channel 2, isoform CRA_c                                      | VDAC2     | 16.17        |                         | -0.97212 | -1.2679  | -2.18618 | -2.04403 | -0.75414           | -0.76907 | -1.33   | 0.64         | B72BA2                | cDNA FLJ51671, highly similar to Prenylcysteine oxidase (EC 1.8.3.5)                             | 1.50                    |           |          |          |          | -1.40224           | -1.1156  |          |          |          |          |       |      |
| O17860       | Interphotoreceptor matrix proteoglycan 1                                              | IMP1G     | 4.80         |                         | -0.69379 | -0.74267 | -2.21543 | -1.85193 | -1.19271           |          | -1.34   | 0.68         | D9Y3D6                | Mitochondrial fission 1 protein                                                                  | 2.00                    |           |          | -0.09960 | -0.42443 | -1.48457           |          |          |          | -1.27    | 1.28     |       |      |
| Q5M84        | Dihydropyrimidinase-like 2 variant (Fragment)                                         | NA        | 19.83        |                         | -1.59266 | -1.45594 | -0.7722  | -1.66226 | -1.30083           | -1.27781 | -1.34   | 0.32         | D3Q395                | Rod outer segment membrane protein 2                                                             | 16.67                   |           |          | -0.5603  | -0.85403 | -1.99999           | -2.04423 | -1.56749 | -0.69758 | -1.28    | 0.64     |       |      |
| A3K308       | Staphylococcal Oxid variant                                                           | HOG1      | 6.46         |                         | -0.57027 | -1.52929 |          |          | -1.18616           | -1.21449 | -1.38   | 0.66         | D3Q395                | Staphylococcal Oxid variant                                                                      | 16.67                   |           |          | -0.92774 | -0.73776 | -1.1826            | -1.11715 | -1.50924 | -1.32689 | -1.29    | 0.48     |       |      |
| Q5CMH4       | NDUF81 protein (Fragment)                                                             | NDUF81    | 1.00         |                         |          | -0.94927 | -1.80286 |          |                    |          | -1.38   | 0.60         | D59G84                | Dihydropyrimidinase-like 2 variant (Fragment)                                                    | 19.83                   |           |          | -1.86138 | -1.82906 | -0.79928           | -1.4049  | -0.87547 | -0.99072 | -1.29    | 0.48     |       |      |
| Q5XKP0       | MIC                                                                                   | MIC13     | 1.00         |                         | -1.29347 | -1.20179 | -1.3307  | -2.05057 | -1.06908           |          | -1.40   | 0.58         | Q4VZ99                | Anion exchange protein                                                                           | NA                      | 6.50      |          |          | -1.12537 | -1.14572           | -1.47208 | -1.84623 | -1.10795 | -1.06447 | -1.29    | 0.31  |      |
| Q68CM6       | STXB1 protein                                                                         | STXB1     | 14.83        |                         | -1.0737  | -1.78653 | -1.25031 | -1.21219 | -1.62587           | -1.44474 | -1.40   | 0.27         | P05109                | Protein S100-A8                                                                                  | 1.33                    |           |          | -0.49832 | -1.04159 | -1.4136            | -1.15237 | -2.75298 | -2.29615 | -1.33    | 1.08     |       |      |
| Q9H3N1       | Thioredoxin-related transmembrane protein 1                                           | TMX1      | 1.50         |                         |          | -0.9129  | -1.80934 |          |                    |          | -1.40   | 0.58         | H0Y466                | Dehydrogenase/reductase SDR family member 7 (Fragment)                                           | 10.67                   |           |          |          |          | -1.12203           | -1.2706  | -2.22396 |          |          | -0.72563 | -1.34 | 0.64 |
| O14894       | Ketamine reductase mu-crystallin                                                      | KRM       | 11.67        |                         | -0.86463 | -1.37756 | -1.54911 | -1.54607 | -1.75474           | -1.36213 | -1.41   | 0.30         | P17804                | RPE-retinal G protein-coupled receptor                                                           | 6.83                    |           |          | -1.55482 | -1.41394 | -1.64174           | -2.03396 | -0.50907 | -0.81132 | -1.24    | 0.54     |       |      |
| B2KX96       | NADH dehydrogenase fs, clone OC8BF2004038, highly similar to Dihydropyrimidinase      | NA        | 9.23         |                         |          |          |          | -1.33118 | -1.71805           |          | -1.45   | 0.63         | P17860                | Interphotoreceptor matrix proteoglycan 1                                                         | 4.80                    |           |          | -0.92774 | -0.73776 | -1.1826            | -1.11715 | -1.50924 | -1.32689 | -1.29    | 0.48     |       |      |
| Q53X05       | Cold inducible RNA binding protein                                                    | CIRBP     | 3.00         |                         | -1.31192 | -1.28307 |          |          | -1.32655           | -1.8781  | -1.45   | 0.29         | D8NF27                | cDNA FLJ92078 fs, clone NT28P1000325, highly similar to Phosphate carrier protein, mitochondrial | 7.40                    |           |          | -1.23973 | -1.22386 | -2.06549           |          |          | -1.15138 | -1.14031 | -1.36    | 0.39  |      |
| Q59E68       | Proteasome 26S non-ATPase subunit 2 variant (Fragment)                                | NA        | 3.50         |                         |          | -0.82845 |          |          | -2.67948           |          | -1.45   | 1.73         | AA0242Q2T0            | Voltage-dependent anion channel 2, isoform CRA_c                                                 | 16.17                   |           |          | -0.96836 | -1.07068 | -1.25733           | -2.04641 | -1.02945 | -1.00182 | -1.38    | 0.56     |       |      |
| P47804       | RPE-retinal G protein-coupled receptor                                                | PEAR      | 6.83         |                         | -1.64711 | -1.27523 | -1.78265 | -2.11992 | -0.76124           | -1.16513 | -1.46   | 1.09         | B3KVE9                | cDNA FLJ16285 fs, clone OC8BF2004038, highly similar to Dihydropyrimidinase-related protein 1    | NA                      | 9.33      |          |          |          |                    | -1.67591 |          | -1.19333 | -1.2876  |          | -1.39 | 0.26 |
| BIAX24       | Phospholipid enriched in astrocytes 15, isoform CRA_a                                 | PL15      | 5.17         |                         | 0.49599  | -1.89905 | -1.6478  | -1.72275 | -2.40767           | -1.61308 | -1.47   | 0.10         | Q53X05                | Cold inducible RNA binding protein                                                               | 3.00                    |           |          | -0.97007 | -1.29453 |                    |          | -1.19333 | -1.64492 | -1.63473 | -1.39    | 0.32  |      |
| Q2Z702       | Cytochrome c oxidase subunit 7A2, mitochondrial                                       | COX7A2    | 2.60         |                         | -0.56998 | -1.89952 | -1.7478  |          | -                  |          |         |              |                       |                                                                                                  |                         |           |          |          |          |                    |          |          |          |          |          |       |      |

Supplementary Table S3. The GO terms used for classification of the proteins.

The last column specifies the GO domain of the GO term:

cellular component (CC), biological process (BP), molecular function (MF).

| GO term identifier | GO term name                                | GO domain |
|--------------------|---------------------------------------------|-----------|
| GO:0009583         | detection of light stimulus                 | BP        |
| GO:0050953         | sensory perception of light stimulus        | BP        |
| GO:0043473         | pigmentation                                | BP        |
| GO:0006582         | melanin metabolic process                   | BP        |
| GO:0042470         | melanosome                                  | CC        |
| GO:0031012         | extracellular matrix                        | CC        |
| GO:0007155         | cell adhesion                               | BP        |
| GO:0005201         | extracellular matrix structural constituent | MF        |
| GO:1990430         | extracellular matrix protein binding        | MF        |
| GO:0006909         | phagocytosis                                | BP        |
| GO:0006508         | proteolysis                                 | BP        |
| GO:0006914         | autophagy                                   | BP        |
| GO:0006897         | endocytosis                                 | BP        |
| GO:0000502         | proteasome                                  | CC        |
| GO:0034702         | ion channel complex                         | CC        |
| GO:1990351         | transporter complex                         | CC        |
| GO:0005215         | transporter activity                        | MF        |
| GO:0005216         | ion channel activity                        | MF        |
| GO:0005739         | mitochondrion                               | CC        |
| GO:0006950         | response to stress                          | BP        |
| GO:0006979         | response to oxidative stress                | BP        |
| GO:0002376         | immune system process                       | BP        |
| GO:0006955         | immune response                             | BP        |
| GO:0005856         | cytoskeleton                                | CC        |
| GO:0005198         | structural molecule activity                | MF        |
| GO:0007010         | cytoskeleton organization                   | BP        |

Supplementary Table S4. The 190 mitochondrial proteins presented in Figure 4a. Differences in expression for both hESC-RPE lines compared to hRPE presented on log2 scale.

Mean number of peptides used for quantification, fold change value for each replicate analysis, technical replicate CV, biological replicate CV, mean fold change, and standard deviation shown for each protein. Note! CV values are calculated using normal scale, not the log2 scale shown here. Differentially expressed proteins (>2-fold difference in expression i.e. values >1 and <-1 on log2 scale) marked with red color for upregulation and green color for downregulation.

| UniProt    | Protein name                                                             | Gene name | Peptide mean | 08/017 hESC-RPE to hRPE |          |          |          |          |          |                        |         |       |               |                    |       | 08/023 hESC-RPE to hRPE |          |          |          |          |          |                        |       |       |               |                    |       |
|------------|--------------------------------------------------------------------------|-----------|--------------|-------------------------|----------|----------|----------|----------|----------|------------------------|---------|-------|---------------|--------------------|-------|-------------------------|----------|----------|----------|----------|----------|------------------------|-------|-------|---------------|--------------------|-------|
|            |                                                                          |           |              | Analysis                |          |          |          |          |          | Technical replicate CV |         |       | Biological CV | Fold change (mean) | StDev | Analysis                |          |          |          |          |          | Technical replicate CV |       |       | Biological CV | Fold change (mean) | StDev |
|            |                                                                          |           |              | 1.1                     | 1.2      | 2.1      | 2.2      | 3.1      | 3.2      | 1                      | 2       | 3     |               |                    |       | 1.1                     | 1.2      | 2.1      | 2.2      | 3.1      | 3.2      | 1                      | 2     | 3     |               |                    |       |
| P61604     | 10 kDa heat shock protein, mitochondrial                                 | HSPE1     | 7.33         | 0.52446                 | 0.484206 | NA       | NA       | 0.901593 | NA       | 1.97                   | NA      | NA    | 19.34         | 0.64               | 0.23  | 0.917834                | 0.766584 | NA       | NA       | 0.606649 | NA       | 7.41                   | NA    | NA    | 11.62         | 0.76               | 0.16  |
| P61981     | 14-3-3 protein gamma                                                     | YWHAH     | 8.67         | -0.27002                | -0.57918 | 0.147277 | -0.10255 | -1.99226 | -2.10735 | 15.10                  | 12.21   | 5.44  | 58.92         | -0.82              | 0.98  | -0.01542                | -0.1718  | 0.166406 | 0.04407  | -0.27404 | -0.74559 | 7.66                   | 10.30 | 22.91 | 18.99         | -0.18              | 0.31  |
| P23748     | 14-3-3 protein theta                                                     | YWHAQ     | 8.80         | NA                      | 0.593291 | 1.080665 | -0.39319 | -0.33958 | -0.99802 | NA                     | 66.55   | 31.72 | 40.03         | -0.01              | 0.83  | NA                      | 0.262594 | 0.993787 | -0.0791  | 0.073567 | -0.17833 | NA                     | 50.29 | 12.31 | 20.68         | 0.21               | 0.47  |
| A0A024R9D7 | 2,4-dienoyl CoA reductase 1, mitochondrial, isoform CRA_b                | DECR1     | 1.00         | NA                      | NA       | -0.43434 | NA       | -1.08145 | NA       | NA                     | NA      | 31.20 | -0.76         | 0.46               | NA    | NA                      | -1.00127 | NA       | -1.3018  | NA       | NA       | NA                     | NA    | NA    | 41.44         | -0.57              | 0.62  |
| E9PCR7     | 2-oxoglutarate dehydrogenase, mitochondrial                              | OGDH      | 10.67        | -0.16344                | 0.146621 | -0.7822  | -0.53343 | -0.57917 | -0.5232  | 15.14                  | 12.16   | 2.74  | 25.61         | -0.41              | 0.34  | -0.01232                | 0.221794 | -0.7142  | -0.75738 | 0.016448 | -0.60675 | 11.45                  | 2.12  | 30.08 | 28.55         | -0.31              | 0.43  |
| O09714     | 3-hydroxyacyl-CoA dehydrogenase type-2                                   | HSD17B10  | 3.80         | 0.49136                 | 0.319496 | NA       | 0.53294  | 0.571598 | 0.01742  | 8.44                   | NA      | 26.83 | 7.43          | 0.39               | 0.23  | 0.160937                | 0.202774 | NA       | 0.42378  | 0.058356 | -0.38646 | 2.05                   | NA    | 21.63 | 19.47         | 0.09               | 0.30  |
| A0A024RA75 | 3-hydroxyisobutyrate dehydrogenase                                       | HIBADH    | 9.67         | 1.898692                | 1.364941 | -0.14956 | 0.114863 | 0.488151 | 0.359647 | 25.87                  | 12.92   | 6.29  | 63.37         | 0.68               | 0.79  | 1.610518                | 1.316762 | -0.14496 | 0.11048  | 0.570763 | 0.313415 | 14.35                  | 12.49 | 12.59 | 54.94         | 0.63               | 0.69  |
| G6NVY1     | 3-hydroxyisobutyryl-CoA hydrolase, mitochondrial                         | HIBCH     | 2.33         | -0.57731                | NA       | -0.53828 | -0.81065 | NA       | NA       | NA                     | 13.31   | NA    | 4.45          | -0.64              | 0.15  | -1.09136                | NA       | -1.40956 | -0.52068 | NA       | NA       | NA                     | 42.24 | NA    | 9.48          | -1.01              | 0.45  |
| P23396     | 40S ribosomal protein S3                                                 | RPS3      | 5.50         | 0.368071                | 0.286259 | 0.250701 | 0.427314 | 0.435787 | 0.705996 | 4.01                   | 8.65    | 13.21 | 9.97          | 0.41               | 0.16  | 0.309782                | 0.47424  | 0.295315 | 0.285072 | 0.533677 | 0.559221 | 8.05                   | 0.50  | 1.25  | 9.00          | 0.41               | 0.13  |
| P62906     | 60S ribosomal protein L10a                                               | RPL10A    | 2.40         | -0.26268                | 0.10469  | 0.119976 | NA       | 0.518329 | 0.433295 | 17.91                  | NA      | 4.17  | 19.58         | 0.18               | 0.31  | -0.06751                | 0.378664 | 0.264889 | NA       | 0.507588 | 0.517354 | 21.70                  | NA    | 0.48  | 12.45         | 0.32               | 0.24  |
| P18077     | 60S ribosomal protein L35a                                               | RPL35A    | 1.00         | 0.47107                 | NA       | -0.1329  | 0.483264 | NA       | NA       | NA                     | 29.75   | NA    | 12.87         | 0.27               | 0.35  | 0.522113                | NA       | 0.371232 | 0.563522 | NA       | NA       | NA                     | NA    | NA    | 2.53          | 0.40               | 0.10  |
| P24752     | Acetyl-CoA acetyltransferase, mitochondrial                              | ACAT1     | 10.50        | 0.839969                | 0.62773  | -0.12017 | 0.124568 | 0.739578 | 0.174817 | 10.38                  | 11.97   | 27.33 | 24.55         | 0.40               | 0.39  | 0.670465                | 0.348867 | -0.39286 | 0.105663 | 0.501028 | 0.128062 | 15.70                  | 24.19 | 18.18 | 21.71         | 0.23               | 0.37  |
| O86Y15     | Acetyltransferase component of pyruvate dehydrogenase complex            | DLAT      | 4.00         | -0.44066                | -0.8083  | -0.68099 | -0.97919 | -0.65045 | -0.75517 | 17.92                  | 14.17   | 5.13  | 7.40          | -0.72              | 0.18  | -0.52519                | -0.5988  | -0.90857 | -1.00025 | -0.63866 | -0.80009 | 3.61                   | 4.49  | 7.99  | 13.47         | -0.17              | 0.19  |
| V9HWB7     | Acetonate hydratase                                                      | ACO1      | 5.50         | 0.835674                | 1.321169 | 0.301481 | 0.738735 | 0.102966 | 0.451393 | 23.57                  | 21.27   | 16.99 | 29.88         | 0.63               | 0.44  | -0.173038               | -0.76897 | 0.498132 | 1.293745 | 0.008453 | 0.834577 | 28.77                  | 38.04 | 39.42 | 19.26         | 0.60               | 0.47  |
| A2A274     | Acetonate hydratase, mitochondrial                                       | ACO2      | 21.50        | -0.55515                | -0.55723 | -0.83229 | -1.0386  | -0.40971 | -0.4109  | 0.10                   | 10.09   | 0.06  | 17.88         | -0.63              | 0.25  | -0.49246                | -0.40311 | -1.00634 | -1.17441 | -0.33246 | -0.46023 | 4.38                   | 8.23  | 6.26  | 24.47         | -0.64              | 0.35  |
| P07108     | Acyl-CoA binding protein                                                 | DBP       | 3.00         | -0.76292                | -1.04238 | -1.43505 | -1.79593 | NA       | NA       | 13.65                  | 17.40   | NA    | 34.04         | -1.28              | 0.45  | -1.40921                | -0.66051 | -1.7406  | -2.27037 | NA       | NA       | NA                     | 25.68 | NA    | 46.90         | -1.52              | 0.67  |
| P07108     | Acyl-CoA binding protein                                                 | DBP       | 4.50         | 0.826823                | 0.892953 | 0.118024 | 0.213197 | 0.304759 | 0.334088 | 3.24                   | 4.66    | 1.44  | 26.47         | 0.45               | 0.33  | 0.348502                | 0.297216 | 0.218664 | 0.602769 | 0.284687 | 0.296855 | 2.54                   | 18.72 | 6.26  | 4.85          | 0.34               | 0.13  |
| O5T4U5     | Acyl-Coenzyme A dehydrogenase, C-4 to C-12 straight chain, isoform CRA_a | ACADM     | 6.00         | 0.258302                | NA       | 0.134537 | NA       | NA       | NA       | NA                     | NA      | NA    | 6.06          | 0.20               | 0.09  | 0.601376                | NA       | -0.10522 | NA       | NA       | NA       | NA                     | NA    | NA    | 33.96         | 0.25               | 0.50  |
| O9NPJ3     | Acyl-coenzyme A thioesterase 13                                          | ACOT13    | 1.20         | -0.35609                | 0.27045  | -0.72019 | -0.86195 | -0.34561 | NA       | 30.23                  | 6.94    | NA    | 26.39         | -0.40              | 0.44  | -1.12489                | -0.40691 | -0.47102 | -0.08899 | -0.07861 | NA       | 34.48                  | 18.62 | NA    | 21.79         | -0.43              | 0.43  |
| P54189     | Adenylate kinase 2, mitochondrial                                        | AK2       | 7.67         | 0.637852                | -0.09129 | -0.6231  | -0.35425 | 0.122102 | -0.2084  | 35.00                  | 13.14   | 16.13 | 27.12         | -0.09              | 0.43  | 0.374258                | 0.125494 | -0.71794 | -0.36763 | 0.514987 | 0.879724 | 12.16                  | 17.09 | 17.78 | 40.22         | 0.13               | 0.59  |
| P12235     | ADP-ATP translocase 1                                                    | SLC25A4   | 14.50        | -0.24764                | -0.59029 | -2.06035 | -1.51109 | -1.47486 | -0.79508 | 16.72                  | 26.60   | 32.71 | 45.75         | 0.17               | 0.68  | -0.25221                | -0.62269 | -2.33107 | -1.79629 | -1.32027 | -0.86412 | 18.06                  | 25.91 | 12.77 | 51.45         | -1.20              | 0.77  |
| A0A024RAD8 | Aldehyde dehydrogenase 4 family, member A1, isoform CRA_a                | ALDH4A1   | 3.17         | -0.5068                 | -0.29909 | -0.64656 | -0.28709 | -0.575   | -0.50523 | 10.16                  | 17.53   | 3.42  | 4.88          | -0.47              | 0.18  | -0.70926                | -0.5454  | -0.3317  | -0.43938 | -0.2924  | -0.2776  | 8.02                   | 5.28  | 0.73  | 11.82         | -0.43              | 0.17  |
| X5D0N2     | Aldehyde dehydrogenase 5 family member A1 isoform B (Fragment)           | ALDH5A1   | 5.33         | -0.10723                | NA       | -0.4813  | -0.86291 | NA       | NA       | NA                     | 18.60   | NA    | 26.74         | -0.48              | 0.38  | 0.352112                | NA       | -1.00431 | -1.57115 | NA       | NA       | NA                     | 27.43 | NA    | 71.71         | -0.74              | 0.99  |
| A0A024RG64 | Aldehyde dehydrogenase 6 family, member A1, isoform CRA_b                | ALDH6A1   | 7.80         | -0.02542                | -0.1205  | 0.16204  | 0.556614 | -0.13294 | NA       | 4.66                   | 19.22   | NA    | 20.01         | 0.09               | 0.29  | -0.05221                | -0.04817 | 0.03613  | 0.450249 | 0.045791 | NA       | 0.20                   | 18.84 | NA    | 11.60         | 0.09               | 0.21  |
| B9EKV4     | Aldehyde dehydrogenase 6 family, member A1                               | ALDH9A1   | 12.50        | 0.625528                | 0.2808   | 0.160381 | 0.181003 | 0.412555 | 0.342918 | 16.82                  | 10.1    | 3.41  | 10.21         | 0.33               | 0.17  | 0.910043                | 0.491113 | 0.120588 | 0.413586 | 0.350388 | 0.278262 | 20.39                  | 14.31 | 3.53  | 17.62         | 0.43               | 0.27  |
| V9HWA2     | Allo-keto reductase family 7, member A2 (Aflatoxin aldehyde reductase)   | AKR7A2    | 1.50         | 1.64109                 | NA       | -0.26521 | -0.40815 | 0.672137 | NA       | NA                     | 7.00    | NA    | 64.80         | 0.41               | 0.95  | 1.422795                | NA       | -0.55627 | -0.9619  | 0.629551 | NA       | 19.75                  | NA    | 11.60 | 64.88         | 0.13               | 1.09  |
| P49419     | Alpha-aminoacidic semialdehyde dehydrogenase                             | ALDH7A1   | 6.33         | 0.809743                | 0.542545 | 0.585228 | 0.285924 | 0.726373 | -0.77172 | 13.06                  | 14.62   | 67.47 | 17.80         | 0.36               | 0.58  | 0.542566                | 0.18078  | 0.363779 | 0.311951 | 0.763721 | -0.54797 | 17.64                  | 2.54  | 60.20 | 4.28          | 0.27               | 0.45  |
| O53YE7     | Amine oxidase [flavin-containing]                                        | MAOA      | 3.20         | -1.40165                | -1.11947 | -1.15516 | -1.17243 | NA       | -1.00283 | 13.79                  | 0.85    | NA    | 8.90          | -1.17              | 0.15  | 0.076595                | -0.73851 | -1.02321 | -1.07218 | NA       | -0.90644 | 38.92                  | 2.40  | NA    | 30.16         | -0.73              | 0.47  |
| O8TB11     | Amine oxidase [flavin-containing]                                        | MAOB      | 1.67         | 0.214016                | NA       | NA       | 0.307386 | -0.9706  | NA       | NA                     | 0.55933 | NA    | 14.15         | 0.14               | 0.21  | 0.262523                | NA       | NA       | 0.05933  | 0.500005 | NA       | NA                     | NA    | NA    | 15.44         | 0.27               | 0.22  |
| O5TZP9     | Annxin                                                                   | ANXA1     | 12.67        | 0.454789                | 0.563415 | -0.19253 | -0.46524 | -0.71576 | -0.50624 | 5.32                   | 13.33   | 10.25 | 42.52         | -0.14              | 0.53  | 0.193686                | 0.344362 | 0.56637  | 0.372852 | 0.310761 | 0.399269 | 7.38                   | 9.47  | 4.34  | 7.06          | 0.36               | 0.12  |
| O5T727     | APEX nuclease (Multifunctional DNA repair enzyme 1)                      | APEX1     | 5.80         | -0.68237                | -0.72939 | 0.529209 | NA       | -0.90827 | -1.00737 | 2.30                   | NA      | 4.86  | 59.48         | -0.56              | 0.62  | -0.71572                | -0.60851 | 0.106231 | NA       | -0.99566 | -0.74165 | 5.25                   | NA    | 12.42 | 77.47         | -0.41              | 0.81  |
| O9S831     | Apoptosis-inducing factor 1, mitochondrial                               | AIFM1     | 10.67        | -0.20686                | -0.55221 | -1.46109 | -0.91167 | -0.57479 | -0.0817  | 16.85                  | 26.61   | 22.17 | 29.75         | -0.63              | 0.50  | -0.07465                | -0.46636 | -1.3279  | -0.79849 | -0.46091 | -0.26623 | 19.09                  | 25.66 | 9.70  | 26.80         | -0.57              | 0.44  |
| V9HW31     | ATP synthase subunit beta                                                | ATP5B     | 65.17        | -0.92464                | -0.93214 | -1.75197 | -1.9082  | -1.03707 | -0.95739 | 0.37                   | 7.65    | 5.72  | 30.60         | -1.26              | 0.45  | -0.94244                | -0.83304 | -1.9789  | -2.05898 | -0.71922 | -0.62965 | 5.49                   | 6.17  | 1.16  | 40.90         | -1.20              | 0.63  |
| Q75947     | ATP synthase subunit d, mitochondrial                                    | ATP5F     | 10.83        | -0.64311                | -0.9145  | -1.41433 | -1.46065 | -0.55535 | -0.8099  | 18.10                  | 0.31    | 25.90 | 22.23         | -0.63              | 0.36  | -0.72874                | -0.73337 | -1.41765 | -1.43938 | -0.17243 | -0.59895 | 0.23                   | 1.06  | 20.75 | 34.65         | -0.85              | 0.49  |
| P300A9     | ATP synthase subunit delta, mitochondrial                                | ATP5D     | 4.93         | -0.33756                | -0.58314 | -1.65781 | -1.55225 | -0.92988 | -0.15915 | 12.01                  | 5.17    | 8.59  | 42.82         | -0.77              | 0.44  | 0.102338                | -0.26906 | -1.42239 | -1.28998 | -0.15569 | 0.046857 | 8.39                   | 6.49  | 10.40 | 43.80         | -0.87              | 0.30  |
| P56385     | ATP synthase subunit e, mitochondrial                                    | ATP5E     | 1.33         | -0.01206                | -0.12236 | -0.27588 | -0.26982 | -0.65925 | -0.27507 | 5.40                   | 22.17   | 18.72 | 16.73         | -0.34              | 0.29  | -0.17420                | 0.19657  | 0.52462  | -0.34726 | 0.302401 | 0.063148 | 17.94                  | 6.68  | 11.70 | 21.14         | -0.08              | 0.32  |
| P56134     | ATP synthase subunit f, mitochondrial                                    | ATP5F2    | 3.50         | -0.89469                | -0.60985 | -0.90537 | -1.21402 | NA       | NA       | 13.92                  | 15.07   | NA    | 14.95         | -0.91              | 0.25  | -0.73835                | -0.353   | -1.36782 | -1.87279 | NA       | NA       | 20.95                  | 24.50 | NA    | 49.14         | -1.09              | 0.67  |
| O75964     | ATP synthase subunit g, mitochondrial                                    | ATP5L     | 2.75         | -0.39051                | NA       | -0.821   | -0.39735 | -0.34259 | NA       | NA                     | 20.62   | NA    | 44.00         | -0.49              | 0.22  | -0.42119                | NA       | -0.43158 | -0.21367 | -0.50865 | NA       | NA                     | 10.66 | NA    | 6.61          | -0.39              | 0.13  |
| P49047     | ATP synthase subunit O, mitochondrial                                    | ATP5O     | 11.17        | -0.04458                | -0.27915 | -1.37058 | -1.28548 | -0.01922 | 0.208476 | 11.47                  | 4.17    | 9.23  | 34.40         | -0.46              | 0.69  | 0.060716                | -0.0603  | -0.12717 | -1.06477 | -0.11667 | 0.493372 | 5.93                   | 3.06  | 29.46 | 41.51         | -0.30              | 0.65  |
| O6IB54     | ATP synthase-coupling factor 6, mitochondrial                            | ATP5J     | 3.33         | -0.46192                | -0.65786 | -1.04989 | -1.1     | -0.16942 | -0.0297  | 9.59                   | 2.46    | 6.83  | 47.07         | -0.58              | 0.44  | -0.74811                | -0.248   | -1.81222 | -1.16306 | -0.77935 | -0.8329  | 24.27                  | 31.43 | 2.62  | 32.12         | -0.93              | 0.52  |
| O53Y06     | ATPase, H+ transporting, lysosomal 31kDa, V1 subunit 1 isoform           |           |              |                         |          |          |          |          |          |                        |         |       |               |                    |       |                         |          |          |          |          |          |                        |       |       |               |                    |       |

| UniProt    | Protein name                                                     | Gene name | Peptide mean | 08/017 HESC-RPE to hRPE |          |          |           |          |          |                        |       |       |               |                    | 08/023 HESC-RPE to hRPE |           |           |          |          |          |          |                        |       |       |               |                    |       |
|------------|------------------------------------------------------------------|-----------|--------------|-------------------------|----------|----------|-----------|----------|----------|------------------------|-------|-------|---------------|--------------------|-------------------------|-----------|-----------|----------|----------|----------|----------|------------------------|-------|-------|---------------|--------------------|-------|
|            |                                                                  |           |              | Analysis                |          |          |           |          |          | Technical replicate CV |       |       | Biological CV | Fold change (mean) | StDev                   | Analysis  |           |          |          |          |          | Technical replicate CV |       |       | Biological CV | Fold change (mean) | StDev |
|            |                                                                  |           |              | 1.1                     | 1.2      | 2.1      | 2.2       | 3.1      | 3.2      | 1                      | 2     | 3     |               |                    |                         | 1.1       | 1.2       | 2.1      | 2.2      | 3.1      | 3.2      | 1                      | 2     | 3     |               |                    |       |
| P30084     | Enoyl-CoA hydratase, mitochondrial                               | ECHS1     | 7.67         | 0.39047                 | 0.325417 | -0.67336 | -0.51787  | -0.08545 | -0.6211  | 3.19                   | 7.61  | 25.96 | 35.66         | -0.20              | 0.48                    | 0.401885  | 0.365041  | -0.80104 | -0.46076 | 0.326182 | 0.698982 | 1.81                   | 16.60 | 18.17 | 37.29         | 0.09               | 0.18  |
| V9HW98     | Epididymis luminal protein 2                                     | YWHAH     | 18.67        | -0.21164                | -0.2477  | 0.358618 | -0.147836 | -0.43028 | -0.534   | 1.77                   | 10.31 | 5.08  | 26.76         | -0.15              | 0.34                    | -0.29109  | -0.3092   | 0.007824 | -0.21016 | -0.10372 | -0.24045 | 0.89                   | 10.66 | 6.70  | 7.06          | -0.19              | 0.52  |
| DOPN1      | Epididymis luminal protein 4                                     | YWHAZ     | 14.33        | -0.63117                | -0.90274 | -0.3634  | -0.27523  | -1.43576 | -1.52421 | 13.27                  | 4.32  | 4.33  | 37.98         | -0.86              | 0.53                    | -0.55579  | -0.5578   | -0.45186 | -0.34919 | -0.69928 | -0.80832 | 0.11                   | 5.03  | 5.34  | 12.16         | -0.17              | 0.57  |
| V9HW90     | Epididymis luminal protein 75                                    | GSR       | 2.50         | -0.17518                | 1.027452 | 0.033275 | 0.506461  | 0.810876 | 0.353466 | 55.75                  | 22.99 | 22.23 | 11.18         | 0.43               | 0.46                    | -0.41738  | -0.679971 | -0.45844 | 0.505866 | 0.648275 | -0.51364 | 51.33                  | 36.61 | 54.06 | 2.26          | 0.11               | 0.16  |
| V9HW42     | Epididymis secretory protein LI 29                               | CKB       | 50.00        | -2.16256                | -2.32478 | -2.1682  | -2.70202  | -3.12377 | -3       | 7.94                   | 25.87 | 6.06  | 27.49         | -2.58              | 0.42                    | -2.373    | -2.45987  | -3.23092 | -2.51815 | -2.55043 | -2.50876 | 4.26                   | 9.65  | 2.04  | 4.48          | -0.46              | 0.09  |
| V9HW22     | Epididymis secretory sperm binding protein LI 67p                | PAK7      | 12.50        | -0.59355                | -0.33432 | -0.20867 | -0.32721  | -0.35666 | -0.1034  | 12.67                  | 5.81  | 12.38 | 8.43          | -0.32              | 0.16                    | -0.57068  | -0.332    | -0.31713 | -0.59595 | -0.68192 | -0.56118 | 12.10                  | 12.59 | 5.91  | 15.42         | -0.42              | 0.23  |
| V9HW47     | Epididymis secretory sperm binding protein LI 70p                | ATC       | 4.40         | NA                      | 2.708129 | 1.39037  | 1.33348   | 0.29977  | 0.39178  | NA                     | 12.70 | 4.51  | 81.32         | 1.19               | 0.57                    | NA        | 2.07853   | 1.146196 | 0.932189 | 0.276155 | 0.655656 | NA                     | 10.47 | 18.52 | 57.80         | 1.02               | 0.68  |
| V9HWB4     | Epididymis secretory sperm binding protein LI 89n                | HSPAS     | 36.67        | 0.922878                | 0.761957 | 0.818482 | 1.064198  | 0.97125  | 0.975126 | 7.88                   | 12.01 | 0.15  | 4.66          | 0.92               | 0.11                    | 0.871029  | 0.806064  | 0.620645 | 0.732214 | 0.806912 | 0.783625 | 3.18                   | 6.15  | 1.14  | 5.97          | 0.77               | 0.09  |
| E9KL44     | Epididymis tissue sperm binding protein LI 14m                   | NPAS      | 27.67        | 0.479001                | 0.616135 | 0.230736 | 0.164397  | -0.00399 | 0.051095 | 6.72                   | 3.25  | 2.70  | 19.00         | 0.26               | 0.24                    | 0.45672   | 0.570864  | -0.20626 | -0.21104 | 0.474634 | 0.33847  | 5.59                   | 0.46  | 6.89  | 25.09         | 0.23               | 0.36  |
| O92506     | Estradiol 17 $\beta$ -dehydrogenase 8                            | HSD17B8   | 1.50         | NA                      | 0.665441 | -0.16137 | -0.12537  | 0.510696 | NA       | NA                     | 1.76  | NA    | 27.24         | 0.22               | 0.43                    | NA        | -1.40925  | 0.202701 | 0.398732 | -0.00083 | NA       | NA                     | 9.59  | NA    | 50.96         | -0.20              | 0.82  |
| AA024R9P6  | Family with sequence similarity 82, member C, isoform CRA_a      | FAM82C    | 2.00         | -0.77533                | NA       | 0.12776  | -0.22261  | NA       | NA       | NA                     | 17.09 | NA    | 35.43         | -0.29              | 0.46                    | -0.47773  | NA        | -0.19565 | -0.56218 | NA       | NA       | NA                     | 17.87 | NA    | 5.91          | -0.41              | 0.19  |
| P49327     | Fatty acid synthase                                              | FASN      | 2.50         | -0.09079                | NA       | 1.258588 | 0.003559  | 1.696295 | NA       | NA                     | 57.91 | NA    | 59.90         | 0.72               | 0.90                    | -0.16315  | NA        | 1.402871 | -0.68907 | 1.022059 | NA       | NA                     | 87.68 | NA    | 38.01         | 0.39               | 0.98  |
| AA024C264  | Fructose-bisphosphate aldolase                                   | ALDOE     | 29.40        | -1.13636                | -1.60061 | NA       | -1.49243  | -2.01299 | -1.71889 | 22.56                  | NA    | 14.36 | 17.40         | -1.59              | 0.32                    | -1.146437 | -1.82175  | NA       | -1.46563 | -1.74741 | -1.70001 | 17.43                  | NA    | 2.32  | 9.17          | -1.64              | 0.17  |
| P07954     | Fumarate hydratase, mitochondrial                                | FH        | 8.33         | -0.45165                | -0.2338  | -1.80563 | -0.95497  | -0.94521 | -0.43879 | 10.66                  | 40.53 | 24.57 | 32.27         | -0.81              | 0.57                    | -0.25247  | -0.15232  | -1.66242 | -1.00126 | -1.10661 | -0.8117  | 4.91                   | 31.85 | 14.40 | 40.36         | -0.83              | 0.56  |
| P17900     | GaNGlioside GM2 activator                                        | GM2A      | 1.80         | 0.784138                | 1.00946  | 1.028086 | 0.26633   | 0.927401 | NA       | 11.02                  | 36.49 | NA    | 8.53          | 0.80               | 0.32                    | 0.406521  | 0.380697  | -0.10526 | 0.081438 | 0.495612 | NA       | 1.27                   | 4.74  | NA    | 16.09         | 0.27               | 0.22  |
| ABXX4      | Glutamine synthetase                                             | PIGS9     | 10.83        | 1.116885                | -0.20791 | -1.24968 | -1.52848  | -1.29362 | -1.9128  | 60.72                  | 13.62 | 29.89 | 89.62         | -0.85              | 1.12                    | 1.009174  | -0.13552  | -0.79225 | -1.19969 | -0.90343 | -1.73095 | 53.34                  | 19.84 | 39.48 | 72.76         | -0.63              | 0.93  |
| OZ74Y4     | GTP-AMP phosphotransferase AK3, mitochondrial                    | AK3       | 2.33         | 0.592097                | NA       | 0.898295 | -0.13518  | NA       | NA       | NA                     | 48.59 | NA    | 5.87          | 0.45               | 0.53                    | 0.951083  | NA        | 0.865214 | 0.372462 | NA       | NA       | NA                     | 23.92 | NA    | 15.20         | 0.73               | 0.31  |
| AA024R3X4  | Heat shock 60kDa protein 1 (Chaperonin), isoform CRA_a           | HSPD1     | 41.17        | -0.24718                | -0.40671 | -0.80101 | -0.93618  | 0.498082 | 1.452736 | 7.81                   | 6.62  | 45.15 | 71.79         | -0.07              | 0.90                    | -0.05676  | -0.34151  | -0.94367 | -0.84987 | 0.252589 | 0.888663 | 13.91                  | 4.60  | 29.29 | 50.40         | -0.18              | 0.68  |
| G61BN1     | HNRNP protein                                                    | HNRNP     | 10.33        | -0.37843                | -0.33839 | 0.423494 | 0.291965  | -0.75367 | -0.45226 | 1.96                   | 6.44  | 14.72 | 36.29         | -0.20              | 0.46                    | 0.033998  | 0.075632  | 0.303365 | 0.450434 | -0.17956 | -0.33541 | 2.05                   | 7.20  | 18.76 | 29.70         | -0.03              | 0.43  |
| P35914     | Hydroxymethylglutaryl-CoA lyase, mitochondrial                   | HMGCL     | 1.00         | NA                      | -0.29117 | -1.43792 | NA        | -0.37612 | 0.152612 | NA                     | NA    | 25.63 | 42.43         | -0.49              | 0.67                    | NA        | 0.358009  | -0.34772 | NA       | -0.09155 | 0.577127 | NA                     | NA    | 32.20 | 24.60         | 0.12               | 0.42  |
| VS4868     | Hydroxymethylglutaryl-CoA synthase, mitochondrial                | HMGCS2    | 9.33         | 1.134297                | 0.95498  | 1.156106 | 1.2448    | 1.098142 | 1.145154 | 8.78                   | 4.35  | 20.34 | 23.33         | 1.12               | 0.10                    | 0.57205   | 0.602847  | 0.340584 | 0.736461 | 0.205486 | 0.749139 | 1.51                   | 19.28 | 26.34 | 0.94          | 0.53               | 0.22  |
| G6Y1N6     | Hydroxysteroid dehydrogenase-like protein 2                      | HSDL2     | 4.50         | 1.10183                 | NA       | 0.194599 | 0.003559  | 0.702004 | NA       | NA                     | 9.35  | NA    | 32.21         | 0.50               | 0.50                    | 1.422714  | NA        | 0.277471 | 0.175829 | 1.636285 | NA       | NA                     | 4.98  | NA    | 21.88         | -0.88              | 0.76  |
| O9HZU2     | Inorganic pyrophosphatase 2, mitochondrial                       | PP2A      | 5.40         | -0.1151                 | -0.04806 | 1.03638  | 0.205216  | NA       | -0.06017 | 3.29                   | 39.65 | NA    | 33.10         | 0.20               | 0.48                    | 0.622452  | -0.18026  | -0.50977 | -0.20056 | NA       | 0.164431 | 38.36                  | 15.10 | NA    | 21.53         | 0.02               | 0.43  |
| O53GF8     | Isoflavone dehydrogenase [NAD] subunit, mitochondrial (Fragment) | NADP2     | 7.00         | -0.2201                 | -0.4629  | -0.62228 | -0.69389  | NA       | -0.77221 | 11.87                  | 3.51  | NA    | 16.11         | -0.27              | 0.32                    | -0.39214  | -0.51171  | -0.79884 | -0.88765 | NA       | -0.59862 | 5.86                   | 4.35  | NA    | 13.46         | -0.64              | 0.20  |
| V9HW42     | Isoflavone dehydrogenase [NADP]                                  | IDI1      | 6.66         | -0.43532                | 1.412354 | 0.441368 | -0.07535  | 0.250916 | 0.312855 | 79.92                  | 25.06 | 3.04  | 22.97         | 0.62               | 0.24                    | -0.01421  | 1.564886  | 0.827637 | 0.080245 | -0.01183 | 0.130883 | 69.45                  | 35.83 | 52.32 | 16.52         | 0.59               | 0.26  |
| O9NS54     | Isolecithin-RNA ligase, mitochondrial                            | IARS2     | 3.00         | 0.899033                | NA       | 0.644588 | NA        | NA       | NA       | NA                     | NA    | NA    | 16.80         | 0.82               | 0.54                    | 1.10346   | NA        | 0.773991 | NA       | NA       | NA       | NA                     | NA    | NA    | 16.08         | 0.94               | 0.23  |
| AA0A0AMT83 | Isovaleryl-CoA dehydrogenase, mitochondrial                      | IVD       | 2.17         | -0.07764                | -0.21803 | 0.09136  | -0.58193  | 0.283439 | 0.556993 | 6.88                   | 23.82 | 13.37 | 28.28         | -0.02              | 0.40                    | 0.376791  | 0.262226  | 0.387767 | -0.33925 | -0.20207 | 0.529716 | 5.61                   | 34.90 | 40.50 | 8.85          | 0.15               | 0.38  |
| O14894     | Ketamine reductase-mycristallin                                  | KRM       | 11.67        | -0.86463                | -1.37756 | -1.5491  | -1.54607  | -1.75674 | -1.36213 | 24.88                  | 0.15  | 19.22 | 16.78         | 1.11               | 0.30                    | -0.75734  | -1.10344  | -1.65602 | -1.83448 | -2.00435 | -1.4042  | 16.88                  | 8.74  | 29.00 | 33.80         | -1.66              | 0.47  |
| E5KNV5     | Lactate-rich PPR-motif containing                                | LRPPRC    | 9.40         | -1.00335                | 0.751622 | -0.19739 | -0.94123  | 0.161381 | NA       | 76.77                  | 35.67 | NA    | 24.38         | -0.25              | 0.75                    | -1.46377  | 0.539824  | 0.025833 | -1.14398 | 0.260379 | NA       | 84.97                  | 54.39 | NA    | 24.68         | -0.36              | 0.89  |
| O5U077     | L-ucinate dehydrogenase                                          | LDHB      | 19.00        | -0.29468                | -0.17775 | 0.043599 | 0.141397  | 0.112825 | 0.187159 | 5.73                   | 4.79  | 3.64  | 13.83         | 0.00               | 0.19                    | -0.29109  | -0.12395  | 0.295728 | 0.198218 | -0.15023 | -0.14693 | 8.18                   | 4.78  | 0.16  | 17.81         | -0.04              | 0.23  |
| G6A1O1     | LYPLA1 protein                                                   | LYPLA1    | 4.20         | 0.41548                 | -0.07981 | -0.55104 | -0.18316  | NA       | 0.279593 | 24.04                  | 17.93 | NA    | 22.12         | -0.02              | 0.38                    | -0.12752  | 0.280121  | -0.54885 | -0.696   | NA       | 0.294762 | 19.85                  | 7.21  | NA    | 30.31         | -0.16              | 0.46  |
| O16891     | IMMT                                                             | IMMT      | 13.83        | -0.26174                | -0.10817 | -0.70412 | -0.48798  | 0.325545 | 0.606287 | 7.52                   | 10.57 | 13.72 | 38.03         | -0.11              | 0.49                    | -0.03302  | -0.22155  | -0.49543 | -0.3313  | 0.524075 | 0.709101 | 9.23                   | 8.04  | 9.06  | 38.69         | 0.03               | 0.49  |
| O5XKP0     | MIC                                                              | MIC13     | 1.00         | -1.29347                | -1.20179 | -1.3307  | -2.06507  | -1.06908 | NA       | 4.49                   | 34.57 | NA    | 19.64         | -1.39              | 0.38                    | -0.55193  | -0.61322  | -1.23833 | -1.32812 | -0.58569 | NA       | 3.00                   | 4.62  | NA    | 25.44         | -0.86              | 0.38  |
| H7C1U8     | MIC                                                              | APOO      | 1.60         | -0.27121                | -0.29933 | -0.93142 | -0.93921  | NA       | -0.27524 | 1.38                   | 0.38  | NA    | 23.99         | -0.54              | 0.36                    | -0.091479 | -0.0357   | -0.9117  | -0.52576 | NA       | -0.19367 | 6.23                   | 17.81 | NA    | 24.31         | -0.31              | 0.40  |
| C9JZ6      | MIC                                                              | CHCHD3    | 1.50         | 0.586602                | 0.663644 | 0.043599 | -0.49837  | NA       | NA       | 3.78                   | 26.26 | NA    | 39.49         | 0.20               | 0.54                    | 0.341256  | 0.546931  | -0.64371 | 0.253667 | NA       | NA       | 10.06                  | 42.62 | NA    | 27.77         | 0.12               | 0.53  |
| O9Y3D6     | Mitochondrial fission 1 protein                                  | FIS1      | 2.00         | NA                      | -0.02373 | -0.63293 | -1.90425  | NA       | NA       | NA                     | 58.57 | NA    | 51.83         | -0.85              | 0.96                    | NA        | 0.099609  | -2.42443 | -1.48457 | NA       | NA       | NA                     | 44.50 | NA    | 84.19         | -1.27              | 1.28  |
| O9H936     | Mitochondrial glutamate carrier 1                                | SLC25A22  | 3.00         | NA                      | -1.9095  | -0.31446 | -0.55883  | NA       | NA       | NA                     | 11.95 | NA    | 66.71         | -0.93              | 0.86                    | NA        | -1.69078  | -1.14105 | -0.60453 | NA       | NA       | NA                     | 26.00 | NA    | 40.17         | -1.15              | 0.54  |
| O94826     | Mitochondrial import receptor subunit TOM70                      | TOMM70A   | 10.00        | 0.038842                | 0.069666 | -1.39129 | NA        | NA       | NA       | 1.51                   | NA    | NA    | 65.47         | -0.43              | 0.83                    | 0.093945  | -0.18126  | -1.22315 | NA       | NA       | NA       | 13.45                  | NA    | NA    | 55.06         | -0.44              | 0.69  |
| E5KRK5     | Mitochondrial NADH-ubiquinone oxidoreductase 75 kDa subunit      | NDUFS1    | 18.00        | -0.32001                | -0.26905 | -1.13581 | -1.11648  | -0.76884 | -0.04872 | 2.50                   | 0.95  | 34.58 | 28.69         | -0.61              | 0.46                    | -0.51733  | -0.37141  | -1.15704 | -1.29431 | -0.87851 | -0.00977 | 7.15                   | 11.60 | 41.34 | 27.50         | -0.69              | 0.48  |
| O9NU11     | Mitochondrial acyl-gluconate esterase, mitochondrial             | ABHD10    | 3.75         | NA                      | -0.35943 | -1.28736 | -1.40745  | -0.7585  | NA       | NA                     | 5.88  | NA    | 32.40         | -0.91              | 0.52                    | NA        | -0.84809  | -1.09040 | -1.48245 | 0.020124 | NA       | NA                     | 14.26 | NA    | 48.80         | -0.88              | 0.65  |
| P35580     | Myosin-10                                                        | MYH10     | 10.17        | 1.357816                | 1.470366 | 0.552529 | 0.574781  | 0.442283 | 0.37564  | 5.51                   | 1.09  | 3.27  | 40.21         | 0.80               | 0.40                    | 1.376116  | 1.121269  | 0.285798 | 1.163715 | 0.740394 | 0.386223 | 8.07                   | 41.75 | 17.27 | 26.61         | 0.86               | 0.46  |
| P23368     | NAD-dependent male enzyme, mitochondrial                         | ME2       | 3.67         | NA                      | 0.572379 |          |           |          |          |                        |       |       |               |                    |                         |           |           |          |          |          |          |                        |       |       |               |                    |       |

| UniProt    | Protein name                                                                  | Gene name | Peptide mean | 08/017 hESC-RPE to hRPE |          |          |          |          |          |                        |       |       |               | 08/023 hESC-RPE to hRPE |       |          |          |          |          |          |          |                        |       |       |               |                    |       |
|------------|-------------------------------------------------------------------------------|-----------|--------------|-------------------------|----------|----------|----------|----------|----------|------------------------|-------|-------|---------------|-------------------------|-------|----------|----------|----------|----------|----------|----------|------------------------|-------|-------|---------------|--------------------|-------|
|            |                                                                               |           |              | Analysis                |          |          |          |          |          | Technical replicate CV |       |       | Biological CV | Fold change (mean)      | StDev | Analysis |          |          |          |          |          | Technical replicate CV |       |       | Biological CV | Fold change (mean) | StDev |
|            |                                                                               |           |              | 1.1                     | 1.2      | 2.1      | 2.2      | 3.1      | 3.2      | 1                      | 2     | 3     |               |                         |       | 1.1      | 1.2      | 2.1      | 2.2      | 3.1      | 3.2      | 1                      | 2     | 3     |               |                    |       |
| AOA0C4DFU2 | Superoxide dismutase                                                          | SOD2      | 6.00         | -0.1575                 | 0.02017  | -1.38021 | -1.20002 | -0.46267 | -0.31196 | 8.70                   | 8.82  | 7.38  | 39.00         | -0.58                   | 0.57  | -0.02319 | 0.074507 | -0.88548 | -0.82105 | 0.283158 | 0.32242  | 4.79                   | 3.16  | 1.92  | 37.16         | -0.17              | 0.54  |
| V9HWC9     | Superoxide dismutase [Cu-Zn]                                                  | SOD1      | 11.50        | 0.258467                | 0.121539 | 0.578143 | 0.378871 | 0.575074 | 0.631229 | 6.71                   | 9.75  | 2.75  | 14.23         | 0.42                    | 0.21  | 0.207984 | 0.254489 | 0.36122  | 0.341927 | 0.327665 | 0.448422 | 2.28                   | 0.95  | 5.92  | 5.64          | 0.32               | 0.08  |
| H9ZYI2     | Thioredoxin                                                                   | TXN       | 2.80         | 0.329741                | 0.451124 | NA       | 0.628462 | 0.316705 | -0.97395 | 5.95                   | NA    | 59.35 | 27.25         | 0.64                    | 0.64  | -0.21951 | 0.003741 | NA       | 0.807968 | -0.03178 | -0.71927 | 10.56                  | NA    | 33.07 | 40.62         | 0.06               | 0.55  |
| P30048     | Thioredoxin-dependent peroxidoreductase, mitochondrial                        | PRDX3     | 7.00         | 0.018969                | 0.552972 | -0.3699  | -0.44285 | -0.01949 | 0.460563 | 25.88                  | 3.57  | 23.31 | 25.02         | 0.03                    | 0.41  | 0.257033 | 0.357665 | -0.47102 | -0.53706 | -0.1736  | 0.363605 | 4.93                   | 3.24  | 26.03 | 27.18         | -0.03              | 0.41  |
| AOA024R3W2 | Translocase of outer mitochondrial membrane 20 homolog (Yeast), isoform CRA_a | TOMM20    | 1.67         | 0.675313                | NA       | -0.79778 | -0.1051  | NA       | NA       | NA                     | 33.31 | NA    | 50.83         | -0.08                   | 0.74  | 0.464363 | NA       | -0.58332 | 0.259371 | NA       | NA       | NA                     | 40.17 | NA    | 27.38         | 0.05               | 0.56  |
| AOA024R0P9 | Translocase of outer mitochondrial membrane 40 homolog (Yeast), isoform CRA_c | TOMM40    | 1.67         | 0.426068                | NA       | 0.429411 | -0.29904 | NA       | NA       | NA                     | 34.96 | NA    | 15.40         | 0.19                    | 0.42  | -0.12776 | NA       | -0.02862 | -0.00937 | NA       | NA       | NA                     | 0.94  | NA    | 5.33          | -0.06              | 0.06  |
| P55084     | Trifunctional enzyme subunit beta, mitochondrial                              | HADHB     | 12.00        | 0.676915                | 0.442769 | 0.232768 | 0.474563 | 0.65475  | 0.450462 | 11.45                  | 11.82 | 10.00 | 7.88          | 0.49                    | 0.16  | 0.717464 | 0.350597 | 0.140239 | 0.326916 | 0.649857 | 0.717328 | 17.88                  | 9.14  | 3.31  | 15.39         | 0.48               | 0.24  |
| B4DLN1     | Uncharacterized protein                                                       | NA        | 2.40         | -0.23045                | 0.489624 | -0.60404 | -0.2958  | NA       | 0.383786 | 34.58                  | 15.05 | NA    | 27.54         | -0.05                   | 0.47  | -0.05016 | 0.998677 | -1.24218 | -0.89608 | NA       | -0.59118 | 49.26                  | 16.88 | NA    | 60.94         | -0.36              | 0.87  |
| AOA024RCN6 | Valyl-tRNA synthetase, isoform CRA_a                                          | VARS      | 2.00         | 1.074891                | NA       | NA       | NA       | -0.33602 | NA       | NA                     | NA    | NA    | 64.12         | 0.37                    | 1.00  | 1.236441 | NA       | NA       | NA       | 0.464958 | NA       | NA                     | NA    | NA    | 36.94         | 0.85               | 0.55  |
| Q9P035     | Very-long-chain (3R)-3-hydroxyacyl-CoA dehydratase 3                          | HACD3     | 4.17         | -0.05068                | 0.080299 | -0.5063  | -0.79456 | 0.044664 | -0.71727 | 6.42                   | 14.08 | 36.50 | 22.53         | -0.32                   | 0.40  | -0.74113 | -0.10297 | -0.63112 | -1.17498 | -0.16941 | -0.40363 | 30.78                  | 26.35 | 11.45 | 20.67         | -0.54              | 0.40  |
| AOA024R1Z6 | Vesicle amine transport protein 1 homolog (T. californica), isoform CRA_a     | VAT1      | 8.50         | 0.171652                | 0.981853 | -0.17357 | -0.11477 | 0.432786 | 0.459432 | 38.70                  | 2.88  | 1.31  | 26.09         | 0.29                    | 0.43  | -0.14075 | 0.823601 | -0.57764 | -0.46458 | 0.101781 | -0.00568 | 45.58                  | 5.54  | 5.26  | 31.33         | -0.04              | 0.50  |
| AOA024QZT0 | Voltage-dependent anion channel 2, isoform CRA_c                              | VDAC2     | 16.17        | -0.97212                | -1.2679  | -2.18618 | -2.04403 | -0.75414 | -0.76907 | 14.45                  | 6.96  | 0.73  | 42.51         | -1.33                   | 0.64  | -0.96836 | -1.07068 | -2.15733 | -2.04641 | -1.02945 | -1.00182 | 5.01                   | 5.43  | 1.35  | 37.01         | -1.38              | 0.56  |
| P21796     | Voltage-dependent anion-selective channel protein 1                           | VDAC1     | 29.00        | -1.46926                | -1.38399 | -2.06146 | -2.12681 | -1.14001 | -1.03722 | 4.18                   | 3.20  | 5.04  | 33.06         | 0.46                    | 0.46  | -1.38325 | -1.35695 | -2.00838 | -1.99421 | -0.99278 | -0.87351 | 1.29                   | 0.69  | 5.84  | 35.46         | -1.43              | 0.48  |
| Q9V277     | Voltage-dependent anion-selective channel protein 3                           | VDAC3     | 7.67         | -0.51945                | -0.81664 | -1.11844 | -0.86099 | -0.20878 | -0.42639 | 14.51                  | 12.58 | 10.65 | 23.18         | -0.66                   | 0.33  | -0.68299 | -0.19104 | -1.10522 | -0.88625 | -0.56903 | -0.13301 | 23.88                  | 10.71 | 21.21 | 22.94         | -0.59              | 0.38  |
| P38606     | V-type proton ATPase catalytic subunit A                                      | ATP6V1A   | 8.67         | -0.98726                | -0.83109 | -0.41689 | -0.34518 | -0.77265 | -0.99126 | 7.65                   | 3.51  | 10.69 | 21.55         | -0.72                   | 0.28  | -1.06087 | -0.70939 | -0.40085 | -0.29648 | -0.74083 | -0.72244 | 17.14                  | 5.11  | 0.90  | 19.49         | -0.66              | 0.27  |

Supplementary Table S5. The 139 proteins involved in response to stress presented in Figure 4b. Differences in expression for both hESC-RPE lines compared to hRPE presented on log2 scale.

Mean number of peptides used for quantification, fold change value for each replicate analysis, technical replicate CV, biological replicate CV, mean fold change, and standard deviation shown for each protein. Note! CV values are calculated using normal scale, not the log2 scale shown here.

| UniProt   | Protein name                                                                                        | Gene name | Peptide mean | 08/017 hESC-RPE to hRPE |          |          |          |          |          |                        |       |       |               |                    |          | 08/023 hESC-RPE to hRPE |          |          |          |          |            |                        |       |       |               |                    |       |      |      |
|-----------|-----------------------------------------------------------------------------------------------------|-----------|--------------|-------------------------|----------|----------|----------|----------|----------|------------------------|-------|-------|---------------|--------------------|----------|-------------------------|----------|----------|----------|----------|------------|------------------------|-------|-------|---------------|--------------------|-------|------|------|
|           |                                                                                                     |           |              | Analysis                |          |          |          |          |          | Technical replicate CV |       |       | Biological CV | Fold change (mean) | StDev    | Analysis                |          |          |          |          |            | Technical replicate CV |       |       | Biological CV | Fold change (mean) | StDev |      |      |
|           |                                                                                                     |           |              | 1.1                     | 1.2      | 2.1      | 2.2      | 3.1      | 3.2      | 1                      | 2     | 3     |               |                    |          | 1.1                     | 1.2      | 2.1      | 2.2      | 3.1      | 3.2        | 1                      | 2     | 3     |               |                    |       |      |      |
| P61604    | 10 kDa heat shock protein, mitochondrial                                                            | HSP61     | 7.33         | 0.52446                 | 0.484206 | NA       | 0.901593 | NA       | 1.97     | NA                     | NA    | 19.34 | 0.64          | 0.23               | 0.917834 | 0.766584                | NA       | 0.606649 | NA       | 7.41     | NA         | NA                     | 11.62 | 0.76  | 0.16          |                    |       |      |      |
| P35991    | 26S proteasome regulatory subunit 7                                                                 | PSMD11    | 2.67         | 0.382338                | 0.153475 | 0.271931 | 0.280129 | 0.495919 | 43.97    | 48.72                  | 10.31 | 63.42 | 0.62          | 0.31               | 0.917834 | 0.766584                | NA       | 0.606649 | NA       | 7.41     | NA         | NA                     | 11.62 | 0.76  | 0.16          |                    |       |      |      |
| P62195    | 26S proteasome regulatory subunit 8                                                                 | PSMC5     | 2.33         | 0.38445                 | -0.12236 | NA       | 0.229236 | NA       | 24.59    | NA                     | NA    | 18.64 | 0.01          | 0.33               | 0.535932 | -0.08136                | NA       | 0.062322 | NA       | 29.80    | NA         | NA                     | 9.68  | 0.17  | 0.32          |                    |       |      |      |
| Q00231    | 26S proteasome non-ATPase regulatory subunit 11                                                     | PSMD11    | 2.33         | NA                      | NA       | NA       | 0.408966 | 0.075238 | NA       | NA                     | NA    | 27.28 | 0.24          | 0.40               | NA       | NA                      | NA       | -0.57904 | 0.219761 | NA       | NA         | NA                     | 38.18 | -0.18 | 0.56          |                    |       |      |      |
| O00487    | 26S proteasome non-ATPase regulatory subunit 14                                                     | PSMD14    | 1.50         | NA                      | NA       | NA       | 0.098951 | 0.668083 | NA       | NA                     | NA    | 16.20 | 0.20          | 0.40               | NA       | NA                      | NA       | 0.137572 | 1.448961 | NA       | NA         | NA                     | 60.19 | 0.79  | 0.93          |                    |       |      |      |
| P23396    | 40S ribosomal protein S3                                                                            | RPS3      | 5.50         | 0.368071                | 0.286259 | 0.250701 | 0.427314 | 0.435787 | 0.705996 | 4.01                   | 8.65  | 13.21 | 9.97          | 0.41               | 0.39     | 0.309782                | 0.47424  | 0.295315 | 0.285072 | 0.533677 | 0.559221   | 8.05                   | 0.50  | 1.25  | 9.00          | 0.41               | 0.13  |      |      |
| P24752    | Acetyl-CoA acetyltransferase, mitochondrial                                                         | ACAT1     | 10.50        | 0.839969                | 0.627773 | -0.12017 | 0.124568 | 0.739578 | 0.174817 | 10.38                  | 11.97 | 27.33 | 24.55         | 0.40               | 0.36     | 0.670465                | 0.348867 | -0.39286 | 0.105563 | 0.51028  | 0.182062   | 15.70                  | 24.19 | 18.18 | 21.71         | 0.21               | 0.13  |      |      |
| P61160    | Actin-related protein 2                                                                             | ACTR2     | 1.50         | 1.017997                | NA       | NA       | -0.5041  | NA       | NA       | NA                     | NA    | 68.37 | 0.26          | 1.08               | 1.141303 | NA                      | NA       | 0.04198  | NA       | NA       | NA         | NA                     | NA    | 51.42 | 0.59          | 0.78               |       |      |      |
| P07108    | Acyl-CoA-binding protein                                                                            | DBI       | 4.50         | 0.826823                | 0.892953 | 0.118024 | 0.213197 | 0.304759 | 0.334088 | 3.24                   | 4.66  | 1.44  | 26.47         | 0.45               | 0.33     | 0.348502                | 0.29672  | 0.218664 | 0.602769 | 0.284687 | 0.296855   | 2.54                   | 18.72 | 0.60  | 4.85          | 0.34               | 0.13  |      |      |
| O51405    | Acyl-Coenzyme A dehydrogenase, C-4 to C-12 straight chain, isoform CRA_a                            | ACADM     | 6.00         | 0.258032                | NA       | 0.134537 | NA       | NA       | NA       | NA                     | NA    | 6.06  | 2.00          | 0.09               | 0.601736 | NA                      | -0.10522 | NA       | NA       | NA       | NA         | NA                     | 33.96 | 0.25  | 0.50          |                    |       |      |      |
| P23526    | Adenosylhomocysteinase                                                                              | AHCY      | 6.67         | 0.885431                | 0.554256 | 0.520551 | 0.544193 | 0.362523 | 0.726989 | 6.43                   | 1.16  | 19.27 | 3.09          | 0.57               | 0.14     | 0.463728                | 0.538427 | 0.34597  | 0.67904  | 0.252589 | 0.250455   | 3.67                   | 16.20 | 0.10  | 10.11         | 0.42               | 0.17  |      |      |
| Q0N142    | Adenylylsuccinate synthase isozyme 1                                                                | ADSS1     | 5.00         | 1.800788                | NA       | 1.573164 | 2.225313 | 0.245973 | 1.138237 | NA                     | 31.43 | 42.39 | 1.40          | 0.75               | 1.369856 | NA                      | 1.122449 | 1.802673 | 0.702395 | 0.740579 | NA         | 40.96                  | 1.87  | 29.59 | 1.18          | 0.53               | 0.44  |      |      |
| P49588    | Alanine--RNA ligase, cytoplasmic                                                                    | AARS      | 6.83         | -0.45273                | -0.78097 | 0.343657 | 0.68071  | 0.768259 | 0.418144 | 16.02                  | 16.45 | 17.08 | 39.55         | 0.16               | 0.63     | 0.089833                | -0.2886  | -0.1025  | 0.340532 | 0.707596 | 0.046664   | 18.44                  | 21.55 | 31.84 | 17.52         | 0.13               | 0.35  |      |      |
| O43707    | Actin-alpha-4                                                                                       | ACTN4     | 2.83         | 0.61939                 | 0.72729  | 0.600866 | 0.524718 | 0.588709 | 0.307401 | 5.29                   | 3.73  | 3.76  | 7.61          | 0.56               | 0.14     | 0.75638                 | 0.750695 | 0.94059  | 0.993244 | 0.73618  | 0.90281    | 0.28                   | 25.99 | 8.16  | 7.65          | 0.01               | 0.41  |      |      |
| O5T229    | Annxin                                                                                              | ANXA1     | 12.67        | 0.454789                | 0.563415 | -0.19253 | -0.46524 | -0.71576 | -0.50624 | 5.32                   | 13.33 | 10.25 | 42.52         | -0.14              | 0.53     | 0.193686                | 0.344362 | 0.56637  | 0.372852 | 0.310761 | 0.399269   | 7.38                   | 9.47  | 4.34  | 7.06          | 0.36               | 0.13  |      |      |
| V9HWED    | Annxin                                                                                              | ANXA5     | 18.83        | 0.811987                | 0.898157 | 1.011878 | 0.990748 | 0.182105 | 0.066023 | 4.22                   | 1.04  | 6.59  | 29.39         | 0.66               | 0.42     | 0.44018                 | 0.617715 | 0.650834 | 0.519134 | 0.631421 | 0.555293   | 8.69                   | 6.45  | 3.73  | 2.34          | 0.57               | 0.08  |      |      |
| O10567    | AP-1 complex subunit beta-1                                                                         | APIB1     | 4.60         | 0.919135                | 0.933771 | 1.232881 | 1.284301 | 0.19974  | NA       | 0.72                   | 2.52  | NA    | 34.55         | 0.91               | 0.43     | 0.720659                | 1.110978 | 1.432238 | 0.318239 | 0.31358  | NA         | 19.01                  | 52.04 | NA    | 42.00         | 0.65               | 0.68  |      |      |
| O5Z7P7    | APEX nuclease (Multifunctional DNA repair enzyme) 1                                                 | APX1      | 5.80         | -0.68237                | -0.72939 | 0.529209 | NA       | -0.90827 | -1.00737 | 2.30                   | NA    | 4.86  | 59.48         | -0.56              | 0.62     | -0.71572                | -0.60851 | 0.102621 | NA       | -0.99566 | -0.74165   | 5.25                   | 15.21 | 12.42 | 77.47         | 0.41               | 0.81  |      |      |
| AA042R3E3 | Apollipoprotein A4, isoform CRA_a                                                                   | APOA1     | 2.33         | 2.634717                | 2.317136 | 1.794767 | 2.021072 | 0.964211 | 0.421314 | 15.50                  | 11.07 | 26.30 | 53.91         | 1.69               | 0.84     | 2.171774                | 2.231446 | 1.251878 | 1.297599 | 2.338172 | 1.711849   | 2.92                   | 22.26 | 30.22 | 30.95         | 1.88               | 0.48  |      |      |
| P0249F    | Apollipoprotein E                                                                                   | APOB2     | 2.40         | NA                      | 0.463317 | -0.40371 | -0.26982 | 0.76788  | -0.13068 | NA                     | 4.21  | 30.73 | 36.02         | 0.22               | 0.45     | NA                      | 0.988047 | 1.12512  | -0.52104 | -0.22291 | 0.423736   | NA                     | 72.94 | 31.22 | 29.43         | 0.66               | 0.27  |      |      |
| O9S821    | Apoptosis-inducing factor 1, mitochondrial                                                          | AIFM1     | 10.67        | -0.2086                 | -0.55221 | -1.46109 | -0.91167 | -0.53779 | -0.08117 | 16.85                  | 26.61 | 22.17 | 29.75         | -0.63              | 0.50     | -0.0745                 | -0.46556 | -1.32789 | -0.79849 | -0.46091 | -0.86639   | 19.09                  | 25.66 | 9.70  | 26.80         | 0.57               | 0.44  |      |      |
| O43681    | ATPase ASNA1                                                                                        | ASNA1     | 3.50         | -0.59088                | 0.424215 | -0.18408 | -1.35055 | NA       | -0.07632 | 47.80                  | 54.25 | NA    | 31.44         | -0.36              | 0.62     | -0.59133                | -0.39556 | 0.014603 | -0.4828  | NA       | -0.36948   | 9.58                   | 24.14 | NA    | 13.55         | -0.36              | 0.23  |      |      |
| Q01813    | ATP-dependent 6-phosphofructokinase, platelet type                                                  | PFKP      | 10.50        | -0.13809                | -0.32359 | 0.372812 | 0.97712  | 0.5848   | 0.737616 | 9.08                   | 13.44 | 7.48  | 30.29         | 0.22               | 0.46     | -0.26321                | -0.09424 | 0.137711 | -0.07298 | 0.403411 | 0.230156   | 8.27                   | 10.31 | 8.48  | 17.38         | 0.06               | 0.24  |      |      |
| Q08211    | ATP-dependent RNA helicase A                                                                        | DHX9      | 7.83         | 0.265362                | 0.161633 | -0.15723 | 0.47608  | 0.06293  | -0.23659 | 5.08                   | 30.55 | 8.50  | 13.47         | 0.07               | 0.27     | 0.206655                | 0.397523 | -0.08388 | -0.17869 | -0.33637 | -0.23793   | 9.34                   | 4.65  | 4.82  | 22.03         | 0.04               | 0.28  |      |      |
| P35613    | Basigin                                                                                             | BSG       | 8.67         | -2.19735                | NA       | -0.83417 | -0.69432 | NA       | NA       | NA                     | 6.85  | NA    | 65.05         | -1.24              | 0.83     | -1.26479                | NA       | -0.5033  | -0.66846 | NA       | NA         | 8.09                   | NA    | 32.78 | -0.81         | 0.40               | 0.28  |      |      |
| P07814    | Bifunctional glutamate/proline--RNA ligase                                                          | EPRS      | 3.00         | -0.08681                | 1.409284 | -0.03433 | NA       | 1.19046  | NA       | 67.39                  | NA    | 39.16 | 0.26          | 0.79               | -0.14662 | 1.361615                | 0.17786  | NA       | 0.012559 | NA       | 67.78      | NA                     | 30.18 | 0.35  | 0.69          | 0.27               |       |      |      |
| P04040    | Catalase                                                                                            | CAT       | 8.83         | 0.236079                | -0.16365 | -0.33404 | -0.3794  | 0.07961  | 0.38357  | 19.47                  | 2.22  | 14.84 | 20.25         | -0.03              | 0.31     | 0.311725                | -0.01573 | 0.566712 | 0.251973 | 0.487228 | 0.478665   | 15.98                  | 15.37 | 12.74 | 15.99         | 0.39               | 0.27  |      |      |
| P21764    | Catechol O-methyltransferase                                                                        | COMT      | 4.17         | -0.00296                | -0.03516 | 0.291553 | 0.388972 | 0.124156 | -0.58928 | 1.58                   | 4.77  | 34.27 | 19.24         | 0.03               | 0.34     | 0.54076                 | 0.341408 | 0.393751 | 0.321766 | -0.43663 | -0.6281    | 9.76                   | 3.53  | 3.77  | 32.82         | 0.09               | 0.49  |      |      |
| CA049R374 | Cathelin B, isoform CRA_a                                                                           | CTSL      | 6.00         | 0.799262                | 0.809523 | -0.02169 | 0.1240   | 0.60250  | 0.482032 | 0.50                   | 4.48  | 11.99 | 29.85         | 0.49               | 0.44     | 0.322979                | 0.275789 | -0.05047 | -0.45641 | 0.351199 | 0.010665   | 2.31                   | 5.44  | 31.77 | 28.37         | 0.29               | 0.41  |      |      |
| P16700    | CD44 antigen                                                                                        | CD44      | 4.00         | 0.317993                | -0.16535 | 0.127275 | 0.434745 | 0.585545 | 0.432925 | 23.28                  | 15.01 | 7.46  | 14.50         | 0.29               | 0.27     | -0.188695               | -0.34794 | 0.282924 | 0.177392 | 0.259688 | 0.201769   | 26.00                  | 10.66 | 2.84  | 12.18         | 0.14               | 0.28  |      |      |
| Q6FHM9    | CD59 antigen, complement regulatory protein, isoform CRA_b                                          | CD59      | 2.00         | 0.87849                 | NA       | NA       | NA       | 0.16444  | NA       | NA                     | NA    | 34.29 | 50.30         | 0.50               | 0.68     | 0.68866                 | NA       | NA       | NA       | 0.942564 | NA         | NA                     | NA    | 12.41 | 8.82          | 0.18               | 18.42 | 0.18 | 0.18 |
| B4DMA2    | cDNA FLJ54023, highly similar to Heat shock protein HSP 90-beta                                     | HSP90B    | 27.00        | 0.332402                | NA       | 0.510353 | 0.764104 | 0.240186 | -0.17594 | NA                     | 12.41 | 20.26 | 20.63         | 0.33               | 0.35     | 0.220826                | NA       | 0.411365 | 0.399498 | 0.10966  | -0.17156   | NA                     | 0.58  | 13.74 | 14.74         | 0.19               | 0.24  | 0.16 |      |
| B4DEA3    | cDNA FLJ56531, highly similar to UV excision repair protein RAD23 homolog B                         | NA        | 4.00         | 0.432208                | NA       | NA       | 0.310857 | -0.06637 | NA       | NA                     | 18.38 | 14.54 | 23.23         | 0.63               | 0.26     | 0.326304                | NA       | NA       | 0.013379 | -0.16171 | NA         | NA                     | 8.57  | 19.38 | 0.06          | 0.25               | 0.25  | 0.25 |      |
| B2RDN9    | cDNA, FLJ96699, highly similar to Homo sapiens tyrosin autoantigen 70kDa (Ku antigen) (GZP21), mRNA | NA        | 14.25        | -0.71173                | NA       | NA       | 0.470573 | 0.306559 | NA       | NA                     | 16.38 | 52.55 | -0.44         | 0.26               | -0.37414 | NA                      | NA       | 0.196457 | -0.586   | -0.51395 | NA         | NA                     | 3.53  | 28.33 | -0.32         | 33.35              | 0.13  | 0.13 |      |
| P41208    | Centrin-2                                                                                           | CENT2     | 1.25         | -0.96596                | -0.40686 | -0.42826 | NA       | 0.211498 | NA       | 27.06                  | NA    | 32.76 | -0.10         | 0.48               | 0.234487 | -0.09189                | 0.537021 | NA       | 0.438166 | NA       | 15.93      | NA                     | NA    | 15.93 | 0.28          | 0.28               | 0.28  | 0.28 |      |
| P10909    | Clustrin                                                                                            | CLU       | 3.00         | 0.022462                | -0.04884 | 0.232993 | 0.836091 | -0.18857 | NA       | 3.49                   | 29.17 | NA    | 28.71         | 0.47               | 0.40     | 0.253361                | -0.55314 | 0.111013 | 0.807679 | -0.01079 | NA         | 38.53                  | 33.50 | NA    | 23.47         | 0.12               | 0.40  | 0.40 |      |
| Q5KJ26    | Colectin-12                                                                                         | COLECT12  | 2.67         | 1.855229                | 1.554266 | 0.775154 | 1.569751 | 1.270517 | 0.999494 | 14.70                  | 37.98 | 13.47 | 22.44         | 1.34               | 0.40     | 2.1545                  | 1.633213 | 1.20281  | 2.124668 | 1.788993 | 1.007687   | 25.13                  | 43.71 | 37.38 | 15.91         | 1.65               | 0.47  | 0.47 |      |
| L14618    | Copper chaperone for superoxide dismutase                                                           | CCHCR1    | 1.00         | NA                      | 0.207893 | 0.47765  | 0.681203 | NA       | 0.442268 | NA                     | 9.96  | NA    | 12.90         | 0.45               | 0.10     | NA                      | 1.415809 | 1.09584  | 0.920504 | NA       | 0.71947    | NA                     | 14.50 | 0.40  | 0.40          | 0.40               | 0.40  | 0.40 |      |
| V9HWZ7    | Crystatin, alpha B, isoform CRA_a                                                                   | CRYAB     | 7.50         | 0.659075                | 0.395929 | 0.143683 | 0.24313  | 2.18964  | 1.084734 | 12.86                  | 48.77 | 63.57 | 34.71         | 0.62               | 0.45     | 0.885226                | 0.715054 | 0.451199 | 0.689039 | 1.140096 | 1.155322   | 8.26                   | 11.62 | 0.74  | 20.26         | 0.84               | 0.28  | 0.28 |      |
| P01034    | Cystatin-C                                                                                          | CST3      | 1.00         | 0.412673                | 0.779647 | 0.193672 | NA       | NA       | 0.386492 | 17.89                  | NA    | 14.40 | 0.44          | 0.24               | 0.370025 | 1.141465                | 0.512395 | NA       | NA       | 0.730421 | 36.93      | NA                     | NA    | 10.34 | 0.40          | 0.34               | 0.34  | 0.34 |      |
| P78527    | DNA-dependent protein kinase catalytic subunit                                                      | PRKDC     | 6.50         | -0.64218                | 0.24184  | 0.319222 | 0.138766 | 0.028582 | -0.36686 | 42.02                  | 8.83  | 19.26 | 15.67         | -0.05              | 0.38     | 0.210069                | -0.74403 | -0.61591 | -0.2649  | 0.19143  | -0.38673</ |                        |       |       |               |                    |       |      |      |

| UniProt    | Protein name                                                                                 | Gene name     | Peptide mean | 08/017 hESC-RPE to hRPE |          |          |          |          |                        |       |       |               |                    | 08/023 hESC-RPE to hRPE |          |          |          |          |          |                        |          |          |               |                    |       |       |       |      |
|------------|----------------------------------------------------------------------------------------------|---------------|--------------|-------------------------|----------|----------|----------|----------|------------------------|-------|-------|---------------|--------------------|-------------------------|----------|----------|----------|----------|----------|------------------------|----------|----------|---------------|--------------------|-------|-------|-------|------|
|            |                                                                                              |               |              | Analysis                |          |          |          |          | Technical replicate CV |       |       | Biological CV | Fold change (mean) | StDev                   | Analysis |          |          |          |          | Technical replicate CV |          |          | Biological CV | Fold change (mean) | StDev |       |       |      |
|            |                                                                                              |               |              | 1.1                     | 1.2      | 2.1      | 2.2      | 3.1      | 3.2                    | 1     | 2     |               |                    |                         | 3        | 1.1      | 1.2      | 2.1      | 2.2      | 3.1                    | 3.2      | 1        |               |                    |       | 2     | 3     |      |
| Q1HBJ4     | Mitogen-activated protein kinase                                                             | MAPK1         | 2.75         | NA                      | NA       | 0.147517 | -0.26823 | -1.00933 | -0.71193               | NA    | 20.24 | 14.52         | 38.58              | -0.46                   | 0.51     | NA       | NA       | -0.25904 | -0.13121 | -0.91625               | -0.41073 | NA       | 6.26          | 24.53              | 21.77 | -0.43 | 0.34  |      |
| P35580     | Myosin-10                                                                                    | MNH10         | 10.17        | 1.357816                | 1.470366 | 0.552529 | 0.574781 | 0.442283 | 0.375644               | 5.51  | 1.09  | 3.27          | 40.21              | 0.80                    | 0.49     | 1.376116 | 1.211269 | 0.285798 | 1.163715 | 0.740394               | 0.386223 | 8.07     | 41.75         | 17.27              | 26.61 | 0.86  | 0.46  |      |
| O69YG1     | Myotrophin                                                                                   | DKFZp761E1322 | 2.67         | 1.041522                | 1.219841 | 1.265219 | 0.94369  | 0.620517 | 0.717215               | 8.73  | 15.69 | 4.74          | 17.14              | 0.97                    | 0.26     | 1.147053 | 1.116579 | 1.24858  | 0.91208  | 0.734689               | 1.191025 | 1.49     | 16.42         | 22.18              | 5.35  | 1.06  | 0.20  |      |
| P06748     | Nucleophosmin                                                                                | NPM1          | 7.67         | 0.599781                | 0.343483 | 1.322935 | 0.611135 | 0.635892 | 0.643133               | 12.53 | 34.20 | 0.35          | 19.48              | 0.69                    | 0.33     | 0.658437 | 0.706411 | 1.048766 | 0.292303 | 0.114252               | 0.503375 | 2.35     | 36.25         | 18.96              | 14.53 | 0.55  | 0.33  |      |
| O75475     | PC4 and SFRS1-interacting protein                                                            | PSIP1         | 2.80         | -1.58496                | -1.40696 | -1.37401 | -1.01817 | NA       | -0.73951               | 8.71  | 17.35 | NA            | 26.63              | -1.22                   | 0.34     | -2.06912 | -1.28216 | -0.94285 | NA       | -0.81207               | 37.64    | 9.90     | NA            | 28.58              | -0.69 | 1.17  | 0.54  |      |
| Q02790     | Peptidyl-prolyl cis-trans isomerase FKBP4                                                    | FKBP4         | 1.50         | -0.34955                | NA       | NA       | 0.147122 | NA       | NA                     | NA    | NA    | NA            | 24.11              | 0.10                    | 0.35     | -0.64686 | NA       | NA       | 0.67662  | NA                     | NA       | NA       | NA            | NA                 | 60.67 | 0.01  | 0.94  |      |
| Q06830     | Peroxiredoxin-1                                                                              | PRDX1         | 17.50        | 0.03462                 | 0.066588 | 0.110187 | 0.35907  | 0.106996 | 0.038215               | 1.57  | 12.17 | 3.37          | 7.31               | 0.12                    | 0.12     | 0.179438 | 0.234586 | 0.125468 | 0.141009 | -0.30487               | -0.3915  | 2.70     | 0.76          | 4.24               | 19.58 | 0.00  | 0.27  |      |
| B1AK24     | Phosphoprotein enriched in astrocytes 15, isoform CRA_a                                      | PEA15         | 5.17         | 0.49599                 | -1.85905 | -1.6478  | -1.72275 | -2.40767 | -1.61308               | 95.18 | 3.67  | 37.99         | 68.77              | -1.46                   | 1.00     | 0.564513 | -0.81398 | -1.20437 | -0.97672 | -1.70163               | -1.43281 | 62.85    | 11.13         | 13.14              | 59.44 | -0.93 | 0.80  |      |
| P34955     | Pigment epithelium-derived factor                                                            | SEPRINF1      | 3.17         | 0.81571                 | 1.024376 | 0.444927 | 0.269614 | 0.412975 | 0.251851               | 10.22 | 16.29 | 7.89          | 22.27              | 0.57                    | 0.31     | 0.730729 | 0.683406 | 0.197634 | 0.607749 | 0.361375               | 0.200993 | 2.32     | 19.94         | 7.90               | 15.37 | 0.46  | 0.24  |      |
| Q02545     | Protamin-A/C                                                                                 | LMNA          | 20.50        | 1.00854                 | 0.455838 | 0.610299 | 0.542927 | -0.31407 | -0.28296               | 16.96 | 3.29  | 1.62          | 29.08              | 0.19                    | 0.41     | 0.028853 | 0.188148 | 0.289223 | 0.415648 | -0.19644               | -0.05199 | 7.80     | 6.19          | 7.08               | 16.48 | 0.11  | 0.23  |      |
| R07337     | Profilin-1                                                                                   | PFN1          | 10.00        | 0.757371                | 0.545318 | 0.405597 | 0.595168 | 1.437388 | 0.893868               | 10.37 | 9.28  | 26.33         | 26.22              | 0.77                    | 0.37     | 0.731521 | 0.68738  | 1.107846 | 1.253985 | 1.554453               | 0.943521 | 2.16     | 7.14          | 29.93              | 19.82 | 1.04  | 0.33  |      |
| A0A024QZ02 | Prosaposin (Variant Gaucher disease and variant metachromatic leukodystrophy), isoform CRA_b | PSAP          | 20.75        | NA                      | -0.80997 | NA       | -0.47583 | 0.46595  | -0.76739               | NA    | NA    | NA            | 14.72              | 11.51                   | -0.63    | 0.18     | NA       | -0.78294 | NA       | -1.1279                | -0.12431 | -0.35929 | NA            | NA                 | 11.49 | 31.76 | -0.60 | 0.45 |
| P49720     | Proteasome subunit beta type-3                                                               | PSMB3         | 2.00         | -0.67418                | NA       | -0.58205 | -0.64319 | NA       | NA                     | NA    | 3.00  | NA            | 3.03               | -0.63                   | 0.05     | -0.51013 | NA       | -0.27273 | -0.13647 | NA                     | NA       | NA       | 6.67          | NA                 | 15.00 | -0.31 | 0.19  |      |
| P28070     | Proteasome subunit beta type-4                                                               | PSMB4         | 2.67         | -0.30218                | NA       | NA       | 0.230153 | -1.10802 | NA                     | NA    | NA    | NA            | 43.45              | -0.39                   | 0.67     | 1.122103 | NA       | NA       | -0.77887 | -0.08299               | NA       | NA       | NA            | NA                 | 67.69 | 0.09  | 0.96  |      |
| Q15084     | Protein disulfide-isomerase A6                                                               | PDIA6         | 11.33        | 0.975682                | 1.075533 | 0.578321 | 0.601958 | 0.943917 | 0.659958               | 4.89  | 1.16  | 13.87         | 15.07              | 0.81                    | 0.22     | 0.944266 | 0.906229 | 0.374164 | 0.374021 | 0.886021               | 0.72019  | 1.86     | 0.01          | 8.12               | 19.04 | 0.70  | 0.26  |      |
| B2R4M6     | Protein S100                                                                                 | S100A8        | 2.20         | NA                      | -0.53341 | -1.98707 | -1.73938 | -2.31433 | -2.80467               | NA    | 12.11 | 23.80         | 72.32              | -1.88                   | 0.85     | NA       | 0.153897 | -1.67691 | -1.12734 | -3.03707               | -2.4691  | NA       | 26.61         | 27.48              | 91.20 | -1.63 | 1.24  |      |
| P05109     | Protein S100-A8                                                                              | S100A8        | 1.33         | -0.73218                | -0.64801 | -1.5924  | -1.54839 | -2.52185 | -2.3978                | 4.12  | 2.16  | 6.08          | 98.53              | -1.57                   | 0.79     | -0.49832 | 0.144159 | -1.4136  | -1.15237 | -2.75298               | -2.29615 | 30.98    | 12.77         | 22.21              | 74.79 | -1.33 | 1.08  |      |
| P04231     | Protein S100-B                                                                               | S100B         | 2.40         | -0.18611                | NA       | 0.516466 | -0.13518 | -0.58482 | -0.57426               | NA    | 31.42 | 0.52          | 27.79              | -0.19                   | 0.45     | 2.262759 | NA       | 1.477197 | 1.572883 | 0.484047               | 0.675179 | NA       | 4.69          | 9.26               | 57.98 | 1.31  | 0.76  |      |
| Q70799     | Protein unc-13 homolog D                                                                     | UNC13D        | 3.23         | NA                      | NA       | 1.224058 | 0.248022 | 0.496201 | NA                     | NA    | 46.09 | NA            | 15.66              | 0.66                    | 0.51     | NA       | NA       | 0.71668  | 0.052531 | -0.23312               | NA       | NA       | 31.99         | NA                 | 31.59 | 0.18  | 0.49  |      |
| A0A024R529 | Pyruvate kinase                                                                              | PKM2          | 64.80        | NA                      | -2.15032 | -1.56313 | -1.58272 | -1.62802 | -1.86826               | NA    | 9.56  | 11.75         | 19.47              | -1.76                   | 0.25     | NA       | -2.58518 | -1.72629 | -1.85266 | -1.65465               | -1.9759  | NA       | 6.68          | 15.68              | 28.19 | -1.96 | 0.37  |      |
| A0A024R845 | RAB14, member RAS oncogene family, isoform CRA_a                                             | RAB14         | 5.67         | -0.40738                | -0.94854 | -0.04223 | 0.214788 | -0.1014  | -0.2421                | 26.22 | 12.56 | 6.89          | 25.01              | -0.25                   | 0.40     | -1.03011 | -0.68651 | -1.13049 | 0.078574 | -0.15737               | -0.71399 | 16.76    | 10.23         | 26.95              | 28.10 | -0.44 | 0.43  |      |
| O9H0U4     | Ras-related protein Rab-1B                                                                   | RAB1B         | 6.80         | -1.39232                | NA       | -0.18197 | -0.75087 | -0.29225 | 0.036975               | NA    | 27.53 | 16.07         | 40.41              | -0.52                   | 0.57     | -0.34101 | NA       | -0.81923 | -0.67732 | -1.10929               | -0.44209 | NA       | 6.95          | 32.13              | 16.72 | -0.68 | 0.30  |      |
| P51149     | Ras-related protein Rab-7a                                                                   | RAB7A         | 7.83         | 0.421519                | -0.15053 | 0.05206  | -0.02379 | 0.85258  | 0.739988               | 27.68 | 3.72  | 5.52          | 30.42              | 0.32                    | 0.42     | 0.344193 | -0.10273 | -0.483   | -0.39989 | -0.0303                | -0.24147 | 21.73    | 40.7          | 10.33              | 19.84 | -0.15 | 0.31  |      |
| O5JR08     | Rho-related GTP-binding protein RhoC (Fragment)                                              | RHOC          | 3.67         | NA                      | NA       | -0.55649 | 0.553664 | NA       | -0.13579               | NA    | 51.87 | NA            | 11.67              | -0.05                   | 0.56     | NA       | NA       | 0.047787 | 0.277389 | NA                     | 0.116062 | NA       | 11.23         | NA                 | 2.50  | 0.15  | 0.12  |      |
| A0A024CYX3 | RNA binding motif (RNP1, RRM) protein 3, isoform CRA_c                                       | RBM3          | 1.00         | 0.146797                | NA       | NA       | NA       | -1.5667  | -1.89115               | NA    | NA    | 15.84         | 80.55              | -1.10                   | 1.10     | -0.49647 | NA       | NA       | -0.73979 | -1.88216               | NA       | NA       | 53.24         | NA                 | 33.85 | -1.04 | 0.74  |      |
| O9Y230     | RuvB-like 2                                                                                  | RUVBL2        | 2.33         | NA                      | 0.890191 | 1.024833 | -0.45184 | NA       | NA                     | NA    | 66.66 | NA            | 20.56              | 0.49                    | 0.82     | NA       | 0.987496 | 0.807102 | -0.2272  | NA                     | NA       | NA       | 48.63         | NA                 | 29.31 | 0.52  | 0.66  |      |
| Q6IRT1     | S-(hydroxymethyl)glutathione dehydrogenase                                                   | ADH5          | 5.67         | 0.391821                | 0.005495 | 0.008193 | 0.311853 | 0.489246 | 0.218593               | 18.82 | 14.83 | 13.23         | 7.09               | 0.24                    | 0.20     | 0.773017 | 0.20965  | -0.02193 | 0.194032 | -0.05801               | 0.399431 | 27.27    | 10.57         | 22.23              | 16.04 | 0.25  | 0.31  |      |
| P16615     | Sarcoplasmic/endoplasmic reticulum calcium ATPase 2                                          | ATP2A2        | 6.40         | 0.197116                | 0.484342 | 0.173602 | 0.011165 | NA       | -0.2066                | 14.03 | 7.95  | NA            | 18.99              | 0.13                    | 0.25     | 0.45975  | 0.527341 | 0.125932 | -0.16306 | NA                     | -0.00784 | 3.31     | 14.12         | NA                 | 21.17 | 0.19  | 0.30  |      |
| P62136     | Serine/threonine-protein phosphatase PP1-alpha catalytic subunit                             | PPP1CA        | 3.20         | 0.190577                | 0.014731 | 0.765987 | 0.362765 | NA       | 0.795598               | 8.61  | 19.64 | NA            | 23.27              | 0.43                    | 0.35     | 0.650781 | 0.342104 | 0.620704 | -0.93408 | NA                     | 0.372997 | 15.07    | 69.67         | NA                 | 15.91 | 0.21  | 0.66  |      |
| Q13813     | Spectrin alpha chain, non-erythrocytic 1                                                     | SPTAN1        | 53.83        | -0.32691                | -0.4504  | -0.34477 | -0.34217 | -0.58168 | -0.44763               | 6.05  | 0.13  | 6.57          | 6.02               | -0.42                   | 0.10     | -0.40921 | -0.41335 | -0.42514 | -0.27984 | -0.64395               | -0.41843 | 0.20     | 3.20          | 11.03              | 7.42  | -0.42 | 0.40  |      |
| Q15020     | Spectrin beta chain, non-erythrocytic 2                                                      | SPTBN2        | 7.17         | 0.689786                | 0.326325 | 0.678602 | 1.423463 | 0.228302 | 0.513301               | 17.72 | 35.73 | 13.92         | 27.85              | 0.64                    | 0.42     | 0.787308 | 0.742157 | 1.53737  | 2.324298 | -0.66314               | 0.60428  | 2.21     | 37.64         | 58.41              | 67.53 | 0.89  | 1.00  |      |
| P63208     | S-phase kinase-associated protein 1                                                          | SKP1          | 4.83         | -0.14831                | -0.21274 | 0.984276 | 0.980363 | -0.19016 | -0.07171               | 3.16  | 0.19  | 5.80          | 49.48              | 0.22                    | 0.59     | 0.076803 | -0.2835  | 0.936496 | 1.191935 | -0.33376               | 0.411393 | 17.57    | 12.49         | 35.73              | 46.67 | 0.33  | 0.63  |      |
| O9UJZ1     | Stomatin-like protein 2, mitochondrial                                                       | STOML2        | 5.33         | NA                      | NA       | -0.22098 | -0.06318 | 0.549418 | NA                     | NA    | 7.73  | NA            | 33.16              | 0.09                    | 0.41     | NA       | NA       | -0.37502 | -0.83764 | 0.726465               | NA       | NA       | 22.48         | NA                 | 60.30 | -0.16 | 0.80  |      |
| Q14683     | Structural maintenance of chromosomes protein 1A                                             | SMC1A         | 1.00         | 1.590398                | NA       | NA       | 1.520956 | NA       | NA                     | NA    | NA    | NA            | 3.40               | 1.56                    | 0.05     | 1.219604 | NA       | NA       | 0.950977 | NA                     | NA       | NA       | NA            | NA                 | NA    | 13.13 | 1.09  | 0.19 |
| A0A024DFU2 | Superoxide dismutase                                                                         | SOD2          | 6.00         | -0.1575                 | 0.02017  | -1.38021 | -1.20002 | -0.46267 | -0.31196               | 8.70  | 8.82  | 7.38          | 39.00              | -0.58                   | 0.57     | -0.02319 | 0.074507 | -0.88548 | -0.82105 | 0.283158               | 0.32242  | 4.79     | 3.16          | 1.92               | 37.16 | -0.17 | 0.54  |      |
| V9WH99     | Superoxide dismutase [Cu-Zn]                                                                 | SOD1          | 11.50        | 0.258467                | 0.121539 | 0.578143 | 0.378871 | 0.575074 | 0.631229               | 6.71  | 9.75  | 2.75          | 14.23              | 0.42                    | 0.21     | 0.207984 | 0.254489 | 0.36122  | 0.341927 | 0.327665               | 0.448422 | 2.28     | 0.95          | 5.92               | 5.64  | 0.32  | 0.08  |      |
| O9Y490     | Talin-1                                                                                      | TLN1          | 12.67        | 0.72129                 | 1.513624 | 0.949289 | 1.809034 | 0.997622 | 1.045696               | 37.89 | 40.93 | 2.36          | 15.03              | 1.17                    | 0.41     | 0.899862 | 0.565002 | 1.529835 | 1.094343 | 1.168056               | 2.76     | 45.60    | 3.61          | 7.85               | 1.04  | 0.32  |       |      |
| O95881     | Thioredoxin domain-containing protein 12                                                     | TXNDC12       | 1.00         | -0.10575                | NA       | -0.0168  | NA       | NA       | NA                     | NA    | NA    | NA            | 4.36               | -0.06                   | 0.06     | -0.94412 | NA       | -0.61475 | NA       | NA                     | NA       | NA       | NA            | NA                 | 16.07 | -0.78 | 0.23  |      |
| P30048     | Thioredoxin-dependent peroxidase reductase, mitochondrial                                    | PRDX3         | 7.00         | 0.018969                | 0.552922 | -0.3699  | -0.44285 | -0.01949 | 0.460563               | 25.88 | 3.57  | 23.31         | 25.02              | 0.03                    | 0.41     | 0.257033 | 0.357665 | -0.47102 | -0.53706 | -0.1736                | 0.363605 | 4.93     | 3.24          | 26.03              | 27.18 | -0.03 | 0.41  |      |
| O9H3N1     | Thioredoxin-related transmembrane protein 1                                                  | TMX1          | 1.50         | NA                      | -0.99129 | -1.80934 | NA       | NA       | NA                     | NA    | NA    | NA            | 39.05              | -1.40                   | 0.58     | NA       | -0.33955 | -1.90335 | NA       | NA                     | NA       | NA       | NA            | NA                 | 69.93 | -1.12 | 1.11  |      |
| P68366     | Tubulin alpha-4A chain                                                                       | TUBA4A        | 38.00        | -1.32715                | -1       | -0.75421 | -0.2128  | -1.78633 | -1.73904               | 15.97 | 26.23 | 2.32          | 44.74              | -1.14                   | 0.61     | -1.45713 | -1.18026 | -0.12998 | -0.45833 | -1.07534               | -1.64373 | 13.53    | 14.43         | 27.08              | 44.07 | -0.99 | 1.12  |      |
| O9UM54     | Unconventional myosin-VI                                                                     | MYO6          | 1.50         | NA                      | NA       | -0.63828 | -1.10964 | -0.96499 | -1.16989               | NA    | 22.   |               |                    |                         |          |          |          |          |          |                        |          |          |               |                    |       |       |       |      |

Supplementary Table S6. The 189 cytoskeletal proteins presented in Figure 4c. Differences in expression for both hESC-RPE lines compared to hRPE presented on log2 scale.

Mean number of peptides used for quantification, fold change value for each replicate analysis, technical replicate CV, biological replicate CV, mean fold change, and standard deviation shown for each protein. Note! CV values are calculated using normal scale, not the log2 scale shown here.

Differentially expressed proteins (>2-fold difference in expression i.e. values >1 and <-1 on log2 scale) marked with red color for upregulation and green color for downregulation.

| UniProt    | Protein name                                | Gene name | Peptide mean | 08/017 hESC-RPE to hRPE |          |           |           |          |          |                        |         |       |               |                    |         | 08/023 hESC-RPE to hRPE |          |          |           |          |          |                        |       |       |               |                    |       |      |
|------------|---------------------------------------------|-----------|--------------|-------------------------|----------|-----------|-----------|----------|----------|------------------------|---------|-------|---------------|--------------------|---------|-------------------------|----------|----------|-----------|----------|----------|------------------------|-------|-------|---------------|--------------------|-------|------|
|            |                                             |           |              | Analysis                |          |           |           |          |          | Technical replicate CV |         |       | Biological CV | Fold change (mean) | StDev   | Analysis                |          |          |           |          |          | Technical replicate CV |       |       | Biological CV | Fold change (mean) | StDev |      |
|            |                                             |           |              | 1.1                     | 1.2      | 2.1       | 2.2       | 3.1      | 3.2      | 1                      | 2       | 3     |               |                    |         | 1.1                     | 1.2      | 2.1      | 2.2       | 3.1      | 3.2      | 1                      | 2     | 3     |               |                    |       |      |
| P62280     | 40S ribosomal protein S11                   | RPS11     | 2.20         | 0.591836                | 0.393619 | NA        | 0.629826  | 1.177416 | 1.003177 | 9                      | 70      | NA    | 8.53          | 22.62              | 0.76    | 0.32                    | 0.894567 | 0.865083 | 0.611458  | 0.746899 | 1.271212 | 3.67                   | 1.09  | 5.84  | 15.28         | 0.73               | 0.21  |      |
| P42532     | 40S ribosomal protein S12                   | RPS12     | 5.00         | 0.486186                | 0.343333 | 0.58767   | 0.573719  | 1.751044 | 1.12715  | 7.99                   | 123     | 35.81 | 12.31         | 0.81               | 0.25    | 0.926519                | 0.858199 | 0.611458 | 0.746899  | 1.271212 | 3.67     | 1.09                   | 5.84  | 15.28 | 0.73          | 0.21               |       |      |
| JKMK5      | 40S ribosomal protein S13                   | RPS13     | 2.00         | 0.12123                 | NA       | NA        | NA        | NA       | NA       | NA                     | NA      | NA    | 52.02         | 0.44               | 0.79    | 0.89399                 | NA       | NA       | NA        | NA       | NA       | NA                     | NA    | NA    | NA            | 77.90              | 0.01  | 1.26 |
| P08708     | 40S ribosomal protein S17                   | RPS17     | 2.67         | 1.938882                | 0.249255 | 0.234346  | 0.155194  | 0.512503 | -0.62458 | 74.48                  | 3.88    | 53.13 | 52.47         | 0.47               | 0.84    | 1.06611                 | 0.031603 | -0.34707 | -0.05504  | 0.053981 | -1.23641 | 48.40                  | 14.26 | 59.34 | 41.73         | -0.08              | 0.74  |      |
| P62269     | 40S ribosomal protein S18                   | RPS18     | 2.00         | -0.26457                | -1.09899 | 0.46978   | 0.432207  | 0.246209 | 0.454387 | 79.79                  | 1.84    | 10.19 | 35.61         | 0.04               | 0.62    | -0.02141                | -0.75032 | 0.44447  | -0.564888 | 0.357991 | 0.214372 | 34.98                  | 5.90  | 7.03  | 28.73         | 0.10               | 0.48  |      |
| P08666     | 40S ribosomal protein S20                   | RPS20     | 2.60         | 0.359965                | NA       | 0.648144  | 0.255992  | 0.841701 | 1.048022 | NA                     | 19.10   | 10.20 | 22.77         | 0.63               | 0.33    | 0.962597                | NA       | 0.741564 | 0.703988  | 0.800753 | 0.23125  | NA                     | 1.84  | 27.56 | 14.67         | 0.69               | 0.27  |      |
| Q8WVWC2    | 40S ribosomal protein S21                   | RPS21     | 1.83         | 0.303983                | 0.199486 | 0.864774  | 0.987162  | 0.709803 | 0.2586   | 5.12                   | 5.99    | 21.94 | 24.15         | 0.55               | 0.34    | 0.601665                | 0.982709 | 1.213872 | 1.143639  | -0.00083 | 0.556749 | 18.57                  | 3.44  | 26.99 | 29.43         | 0.75               | 0.46  |      |
| P23396     | 40S ribosomal protein S23                   | RPS23     | 5.50         | 0.368071                | 0.286259 | 0.250701  | 0.427314  | 0.435787 | 0.705996 | 4.01                   | 8.65    | 13.21 | 9.97          | 0.41               | 0.36    | 0.309782                | 0.47424  | 0.295315 | 0.285072  | 0.533677 | 0.559221 | 8.05                   | 5.00  | 1.25  | 9.00          | 0.41               | 0.13  |      |
| Q6NXR8     | 40S ribosomal protein S3a                   | RPS3a     | 4.17         | -0.03971                | -0.53039 | 0.035807  | -0.14302  | 0.38145  | 0.566854 | 23.82                  | 8.72    | 9.07  | 27.49         | 0.05               | 0.39    | -0.00022                | 0.149334 | 0.473739 | 0.112115  | 0.301995 | 0.438661 | 7.32                   | 17.63 | 6.72  | 10.44         | 0.25               | 0.13  |      |
| Q96DV6     | 40S ribosomal protein S6                    | RPS6      | 1.75         | NA                      | NA       | 1.252037  | -0.584545 | 0.421141 | 1.052995 | NA                     | 78.67   | 30.48 | 7.71          | 0.54               | 0.81    | NA                      | NA       | 1.132641 | 0.035889  | 0.60882  | 0.753326 | NA                     | 51.31 | 7.08  | 0.16          | 0.63               | 0.46  |      |
| Q5R9W9     | 40S ribosomal protein S7                    | RPS7      | 3.17         | 0.091152                | 0.46638  | 0.329905  | 0.611825  | -0.26025 | -0.17403 | 27.93                  | 13.78   | 4.22  | 28.55         | 0.02               | 0.41    | 0.200757                | -0.28108 | -0.20379 | 0.264212  | 0.421125 | 0.547111 | 23.40                  | 22.34 | 6.17  | 19.84         | 0.16               | 0.33  |      |
| Q5R9P5     | 40S ribosomal protein S8                    | RPS8      | 5.00         | 0.738264                | NA       | 0.419356  | 0.710981  | 0.440533 | NA       | NA                     | 14.24   | NA    | 10.39         | 0.58               | 0.17    | 0.95719                 | NA       | 0.295728 | 0.476604  | 0.618951 | NA       | 8.85                   | NA    | 19.56 | 0.60          | 0.28               |       |      |
| Q9YK3      | 40S ribosomal protein SA (Fragment)         | RPSA      | 4.17         | 0.896578                | 0.719818 | 0.55974   | 0.970719  | 0.250986 | 0.433714 | 8.65                   | 20.31   | 71.89 | 28.11         | 0.94               | 0.57    | 0.610733                | 0.6856   | 0.470115 | 0.852253  | 0.183669 | 0.455309 | 3.67                   | 18.53 | 62.07 | 26.62         | 0.81               | 0.51  |      |
| AAO487WV22 | 60S ribosomal protein L10                   | RPL10     | 1.33         | NA                      | 0.427324 | 0.96621   | 0.672463  | NA       | NA       | NA                     | 14.35   | NA    | 19.46         | 0.69               | 0.28    | NA                      | 0.121043 | 0.107016 | 0.522827  | NA       | NA       | NA                     | 26.50 | NA    | 33.71         | 0.57               | 0.48  |      |
| P62906     | 60S ribosomal protein L10a                  | RPL10A    | 2.40         | -0.26268                | 0.10469  | 0.119976  | NA        | 0.518329 | 0.433295 | 17.91                  | NA      | 4.17  | 19.58         | 0.18               | 0.31    | -0.06751                | 0.378664 | 0.264889 | NA        | 0.507588 | 0.517354 | 21.70                  | NA    | 0.48  | 12.85         | 0.32               | 0.24  |      |
| P30050     | 60S ribosomal protein L12                   | RPL12     | 3.40         | 0.537945                | 0.631411 | 0.876083  | 0.639673  | 0.91099  | NA       | 4.58                   | 11.56   | NA    | 11.22         | 0.72               | 0.16    | 0.624728                | 0.638673 | 0.799125 | 0.89291   | 0.447445 | NA       | 0.68                   | 4.60  | NA    | 13.49         | 0.68               | 0.17  |      |
| AK8AC8     | 60S ribosomal protein L13                   | RPL13     | 3.25         | NA                      | NA       | 0.90383   | 0.336699  | 0.649858 | 0.22888  | NA                     | 27.44   | 20.49 | 9.46          | 0.53               | 0.31    | NA                      | NA       | 0.620319 | 0.211791  | -0.18132 | 0.432963 | NA                     | 19.02 | 29.66 | 12.80         | 0.27               | 0.34  |      |
| MOR3D6     | 60S ribosomal protein L18a (Fragment)       | RPL18A    | 1.00         | NA                      | NA       | NA        | 1.449878  | NA       | -0.08065 | NA                     | NA      | NA    | 68.69         | 0.68               | 1.08    | NA                      | NA       | 0.966041 | NA        | 0.663061 | NA       | NA                     | NA    | NA    | 14.80         | 0.81               | 0.21  |      |
| K7ELC7     | 60S ribosomal protein L27 (Fragment)        | RPL27     | 1.20         | 0.5154                  | 0.220493 | NA        | 1.613655  | 1.183829 | 0.682852 | 14.40                  | NA      | 24.31 | 42.82         | 0.64               | 0.55    | 0.569247                | 0.554753 | NA       | 1.349275  | 1.09415  | 0.712763 | 0.71                   | NA    | 18.58 | 27.44         | 0.86               | 0.35  |      |
| ESBRW9     | 60S ribosomal protein L30 (Fragment)        | RPL30     | 2.00         | 0.4835                  | NA       | -0.223656 | 0.521226  | -0.27253 | 0.635784 | NA                     | 37.66   | 44.30 | 0.52          | 0.52               | 0.24718 | NA                      | 0.094042 | NA       | 0.858003  | 0.355428 | NA       | 32.81                  | 53.74 | 0.84  | 0.01          | 0.49               |       |      |
| P18077     | 60S ribosomal protein L35a                  | RPL35A    | 1.00         | 0.47107                 | NA       | -0.1329   | 0.485264  | NA       | NA       | NA                     | 29.75   | NA    | 12.81         | 0.27               | 0.35    | 0.522113                | NA       | 0.371232 | 0.563522  | NA       | 0.41     | NA                     | NA    | NA    | 2.53          | 0.49               | 0.10  |      |
| Q9HBB3     | 60S ribosomal protein L6                    | NA        | 1.25         | 0.761558                | NA       | 1.442441  | NA        | 0.100361 | 1.024177 | NA                     | NA      | 43.79 | 31.95         | 0.83               | 0.56    | 0.525466                | NA       | 1.76036  | NA        | 0.153078 | 0.859099 | NA                     | NA    | 33.93 | 53.33         | 0.82               | 0.69  |      |
| EP9KZ0     | 60S ribosomal protein L8 (Fragment)         | RPL8      | 1.00         | NA                      | NA       | 1.567273  | -0.31174  | NA       | 1.1219   | NA                     | 80.96   | NA    | 10.16         | 0.97               | 0.98    | NA                      | NA       | 1.919539 | 0.754972  | NA       | 0.7198   | NA                     | 54.17 | NA    | 35.12         | 1.13               | 0.68  |      |
| Q53207     | 60S ribosomal protein L9                    | RPL9      | 3.67         | 1.228874                | 0.099207 | 0.422901  | 0.42437   | 1.023665 | 0.401763 | 52.70                  | 0.07    | 30.00 | 12.90         | 0.60               | 0.43    | 1.121398                | 0.318972 | 0.494724 | 0.515078  | 0.817863 | 0.315899 | 38.35                  | 1.00  | 24.36 | 9.74          | 0.60               | 0.32  |      |
| Q72612     | Acidic ribosomal phosphoprotein P1          | ARF1      | NA           | 2.83                    | NA       | -0.58054  | -0.64267  | -0.2142  | -0.30848 | -0.06293               | 0.30021 | NA    | 3.04          | 4.62               | 4.56    | -0.07096                | -0.17056 | -0.30958 | -0.70379  | -0.26606 | -0.53272 | 4.88                   | 19.20 | 13.03 | 13.72         | 0.40               | 0.32  |      |
| P68032     | Actin, alpha cardiac muscle 1               | ACTC1     | 27.33        | NA                      | NA       | -0.39931  | -0.05084  | NA       | 0.366038 | NA                     | 17.00   | NA    | 27.83         | 0.03               | 0.38    | NA                      | NA       | 0.0495   | 0.216577  | NA       | 0.649476 | NA                     | 8.18  | NA    | 24.93         | 0.31               | 0.31  |      |
| AAO424R694 | Actin, alpha 1, isoform CRA_a               | ACTN1     | 13.80        | 1.270185                | 0.39116  | 0.626674  | 1.438543  | 0.83485  | NA       | 41.80                  | 38.77   | NA    | 9.37          | -0.91              | 0.44    | 1.675816                | 0.688611 | 1.133795 | 1.308185  | 1.352738 | NA       | 46.57                  | 8.54  | NA    | 4.60          | 1.23               | 0.36  |      |
| P61160     | Actin-related protein 1                     | ACTR2     | 1.50         | 1.017997                | NA       | NA        | NA        | -0.5041  | NA       | NA                     | NA      | NA    | 68.37         | 1.08               | 0.88    | 1.141303                | NA       | NA       | 0.04198   | NA       | NA       | NA                     | NA    | NA    | 51.42         | 0.59               | 0.78  |      |
| Q2LE1      | Actin-related protein 2/3 complex subunit 3 | ARPC3     | 2.00         | NA                      | NA       | 0.241732  | NA        | 0.08509  | 1.059568 | NA                     | NA      | NA    | 39.19         | 0.47               | NA      | NA                      | 0.094042 | NA       | 0.858003  | 0.355428 | NA       | NA                     | 24.39 | 25.90 | 0.44          | 0.39               |       |      |
| Q9NP13     | AcyL-coenzyme A thioesterase 13             | ACOT13    | 1.20         | -0.35609                | 0.27045  | -0.72019  | -0.86195  | -0.34561 | NA       | 30.23                  | 6.94    | NA    | 26.39         | -0.40              | 0.44    | -1.12489                | -0.40491 | -0.47102 | -0.08899  | -0.07861 | NA       | 34.48                  | 18.82 | NA    | 21.79         | -0.43              | 0.43  |      |
| Q5VU08     | Adducin 3 (Gamma), isoform CRA_a            | ADD3      | 2.50         | 0.290365                | NA       | 0.663788  | NA        | -1.12286 | -1.44435 | NA                     | NA      | 15.69 | 54.85         | -0.40              | 1.04    | 0.62629                 | NA       | -0.24278 | NA        | -0.99814 | -0.84016 | NA                     | NA    | 7.74  | 53.34         | -0.36              | 0.74  |      |
| D3DUJ2     | Adenylyl cyclase-associated protein         | CAP1      | 1.83         | 0.132861                | 0.014731 | -0.20043  | -0.11791  | -0.10245 | -0.63639 | 5.79                   | 4.04    | 25.88 | 14.66         | -0.15              | 0.26    | 0.203995                | 0.010101 | -0.10522 | 0.027     | 0.256922 | 0.034587 | 9.49                   | 6.48  | 10.88 | 6.74          | 0.07               | 0.13  |      |
| P12235     | ADP/ATP translocase 1                       | SLC25A4   | 14.50        | -0.24764                | -0.59029 | -2.06035  | -1.51109  | -1.47486 | -0.79508 | 16.72                  | 26.60   | 32.71 | 45.75         | -1.11              | 0.68    | -0.25221                | -0.62269 | -2.33107 | -1.79629  | -1.32027 | -0.8412  | 18.06                  | 25.91 | 22.17 | 51.45         | -1.20              | 0.77  |      |
| AAO424R303 | ADP-ribosylation factor 1, isoform CRA_a    | ARF1      | 6.00         | -0.43586                | NA       | 0.206822  | 0.236432  | -0.55289 | -1.00538 | NA                     | 1.45    | 22.00 | 35.95         | -0.31              | 0.53    | -0.43712                | NA       | -0.12744 | 0.176053  | -0.31641 | -0.52192 | NA                     | 14.82 | 10.06 | 19.22         | -0.25              | 0.28  |      |
| P36405     | ADP-ribosylation factor-like protein 3      | ARL3      | 2.67         | 0.166224                | -0.13585 | NA        | NA        | NA       | -0.40415 | 14.75                  | NA      | NA    | 20.79         | -0.12              | 0.29    | -0.71589                | -0.23238 | NA       | NA        | NA       | -0.36617 | 44.68                  | NA    | NA    | 32.80         | 0.04               | 0.59  |      |
| Q02952     | A-kinase anchor protein 12                  | AKAP12    | 5.83         | -1.04377                | -0.16514 | -1.56313  | -0.78589  | -1.69751 | -0.55068 | 41.78                  | 37.20   | 53.43 | 22.50         | -0.97              | 0.59    | -0.54296                | -0.41012 | -0.86459 | -0.27892  | -1.33585 | -1.19465 | 6.51                   | 28.32 | 6.92  | 27.76         | 0.77               | 0.43  |      |
| Q14307     | Alpha-actinin-4                             | ACTN4     | 22.83        | 0.61939                 | 0.72029  | 0.608086  | 0.524718  | 0.588709 | 0.307041 | 5.29                   | 3.73    | 13.76 | 7.61          | 0.56               | 0.14    | 0.75638                 | 0.750695 | 0.94059  | 0.993424  | 0.73618  | 0.9028   | 0.28                   | 2.59  | 8.16  | 7.65          | 0.85               | 0.11  |      |
| RKGN70     | Alpha-centractin                            | ACTA1     | 1.00         | -1.04824                | -        |           |           |          |          |                        |         |       |               |                    |         |                         |          |          |           |          |          |                        |       |       |               |                    |       |      |



| UniProt    | Protein name                                            | Gene name | Peptide mean | 08/107 HESC-RPE to hRPE |          |          |          |          |          |       | Technical replicate CV | Biological CV | Fold change (mean) | StDev | 08/023 HESC-RPE to hRPE |          |          |          |          |          |           |          |       |       |       |       |      |
|------------|---------------------------------------------------------|-----------|--------------|-------------------------|----------|----------|----------|----------|----------|-------|------------------------|---------------|--------------------|-------|-------------------------|----------|----------|----------|----------|----------|-----------|----------|-------|-------|-------|-------|------|
|            |                                                         |           |              | Analysis                |          |          |          |          |          | StDev |                        |               |                    |       | Analysis                |          |          |          |          |          | StDev     |          |       |       |       |       |      |
|            |                                                         |           |              | 1.1                     | 1.2      | 2.1      | 2.2      | 3.1      | 3.2      |       |                        |               |                    |       | 1.1                     | 1.2      | 2.1      | 2.2      | 3.1      | 3.2      |           |          |       |       |       |       |      |
| P35555     | Fibrillin-1                                             | FBN1      | 25.83        | 1.607747                | 0.988756 | 3.17947  | 1.315035 | 1.849868 | 2.22429  | 29.88 | 0.14                   | 18.25         | 30.98              | 1.55  | 0.44                    | 2.635805 | 2.18955  | 2.497953 | 2.681427 | 1.935242 | 2.457065  | 21.70    | 8.9   | 25.30 | 12.83 | 2.40  | 0.29 |
| AOA087WVY8 | Fibrillin-2                                             | FBN2      | 2.33         | NA                      | NA       | 1.394953 | NA       | 0.369381 | 1.421472 | NA    | NA                     | 49.40         | 19.75              | 1.06  | 0.40                    | NA       | NA       | 2.19534  | NA       | 0.574239 | 1.367344  | NA       | NA    | 37.92 | 55.43 | 1.39  | 0.82 |
| P21333     | FLNA                                                    | FLNA      | 38.83        | 1.279703                | 1.27822  | 1.027436 | 0.960179 | 0.79485  | 1.030971 | 0.07  | 3.00                   | 11.55         | 13.57              | 1.06  | 0.19                    | 1.270175 | 1.293218 | 1.508711 | 1.393843 | 1.132476 | 1.327719  | 1.13     | 2.79  | 9.55  | 6.91  | 1.31  | 0.21 |
| O75369     | FLNB                                                    | FLNB      | 9.67         | 0.744152                | 0.851052 | 0.808226 | 0.621111 | 0.276531 | 0.217864 | 5.24  | 9.16                   | 2.88          | 19.38              | 0.59  | 0.27                    | 1.025099 | 0.886578 | 0.87601  | 0.804938 | 0.521196 | 0.616215  | 6.78     | 3.48  | 5.14  | 16.89 | 0.76  | 0.24 |
| Q14315     | FLNC                                                    | FLNC      | 5.50         | NA                      | NA       | -0.06815 | NA       | 0.737786 | NA       | NA    | NA                     | 38.50         | 3.20               | 0.57  | NA                      | NA       | 4.50249  | NA       | 0.636313 | NA       | NA        | NA       | 9.11  | 5.4   | 0.13  | 0.54  | 0.13 |
| Q50T53     | FWP004                                                  | NA        | 2.20         | 0.230553                | 0.073099 | NA       | 0.252676 | 0.288827 | 0.590042 | 7.71  | NA                     | 14.71         | 10.49              | 0.29  | 0.19                    | 0.615604 | -0.05457 | NA       | 0.857145 | 0.04499  | 0.531346  | 32.27    | NA    | 23.61 | 22.92 | 0.40  | 0.39 |
| G3V4F8     | Glia maturation factor beta (Fragment)                  | GMFB      | 1.00         | 1.044102                | NA       | 0.758172 | NA       | NA       | NA       | NA    | NA                     | 13.97         | 0.90               | 0.20  | 0.615461                | NA       | 0.32208  | NA       | 1.162929 | NA       | -0.09479  | NA       | NA    | NA    | 68.84 | -0.86 | 1.02 |
| P14136     | Glycylglycyl acidase protein                            | GFAP      | 12.50        | NA                      | NA       | NA       | -1.46451 | NA       | -0.50684 | NA    | NA                     | NA            | 45.29              | 0.99  | 0.68                    | NA       | NA       | NA       | NA       | NA       | NA        | -0.09479 | NA    | NA    | 68.84 | -0.86 | 1.02 |
| P09489     | Guanine nucleotide-binding protein G(i) subunit alpha-2 | GNAI2     | 6.80         | 0.539572                | 0.63161  | 0.003253 | NA       | -0.70068 | 0.159588 | 5.56  | NA                     | 40.96         | 23.59              | 0.15  | 0.32805                 | 0.285916 | 0.79823  | 0.08189  | 0.961003 | 0.2346   | 0.961003  | 2.06     | NA    | 49.86 | 18.15 | 0.31  | 0.49 |
| B2R49R     | Hsp56/2677                                              | RPS28     | 1.00         | -1.25235                | -1.35359 | 0.16642  | 0.402997 | -0.38723 | NA       | 1.90  | 27.55                  | NA            | 4.21               | 0.55  | 0.75                    | -0.44068 | -0.72315 | 0.777586 | 0.877471 | 0.2346   | 0.2346    | 3.94     | 4.89  | NA    | 48.26 | -0.45 | 0.25 |
| K7EP04     | Heat shock protein beta-6                               | HSPB6     | 1.00         | NA                      | NA       | 1.585581 | NA       | 0.536273 | NA       | NA    | NA                     | 49.28         | 1.06               | 0.74  | NA                      | NA       | 0.886999 | NA       | -0.51513 | NA       | NA        | NA       | NA    | 63.78 | 0.19  | 0.99  | 0.99 |
| Q7Z4W8     | Heparin-binding protein Hbp15                           | NA        | 1.33         | -2.23022                | -1.77544 | 0.44116  | 0.784756 | -0.71668 | -1.56587 | 22.11 | 56.71                  | 40.46         | 78.62              | -0.99 | 1.10                    | 0.085099 | -1.8001  | 0.28953  | 0.464584 | 0.66677  | 0.207528  | 81.17    | 8.57  | 7.79  | 32.05 | -0.06 | 0.86 |
| P49773     | Histidine triad nucleotide-binding protein 1            | HINT1     | 2.33         | 0.513608                | 0.63496  | 0.498019 | 0.510908 | 0.609656 | 0.901908 | 5.94  | 0.28                   | 14.28         | 9.42               | 0.61  | 0.15                    | 0.564365 | 0.715162 | 0.550561 | 0.915295 | 0.397929 | 0.814022  | 7.38     | 17.78 | 20.25 | 4.64  | 0.66  | 0.19 |
| O70305     | Histone H9.1                                            | H1FO      | 2.17         | -0.220482               | -2.14108 | -0.46693 | -0.69816 | -1.0726  | -1.32142 | 5.70  | 12.28                  | 2.39          | 47.76              | -1.25 | 0.69                    | -1.58474 | -1.29022 | -0.69564 | -0.69477 | -1.5761  | -1.44209  | 14.39    | 0.04  | 6.56  | 33.18 | 0.76  | 0.49 |
| P05556     | Integrin beta-1                                         | ITGB1     | 2.33         | 0.149462                | 0.28122  | 0.62839  | 0.613271 | 0.735134 | 0.260371 | 20.95 | 0.72                   | 23.06         | 23.18              | 0.35  | 0.39                    | -0.25717 | -0.68085 | 0.93993  | 0.76182  | 0.983781 | 0.133137  | 20.62    | 8.46  | 32.28 | 41.53 | 0.34  | 0.69 |
| Q17860     | Interphotoreceptor matrix proteoglycan 1                | IMP1      | 4.80         | -0.69379                | -0.74267 | -2.21543 | -1.85193 | -1.19271 | NA       | 2.40  | 17.72                  | NA            | 42.04              | -1.34 | 0.68                    | -0.92778 | -1.02736 | -1.12886 | -1.89608 | -0.84878 | NA        | 4.88     | 10.61 | NA    | 37.55 | -0.36 | 0.59 |
| HVRV63     | Keratin 1                                               | KRT1      | 10.00        | 1.715608                | 1.31307  | 0.771898 | 0.149976 | 0.42978  | 0.164514 | 19.61 | 30.02                  | 12.96         | 49.22              | 1.74  | 0.64                    | 1.502371 | 0.944861 | 0.32127  | -0.1727  | 0.436944 | 0.774393  | 26.99    | 29.98 | 16.46 | 40.04 | 0.63  | 0.58 |
| P13645     | Keratin, type I cytoskeletal 10                         | KRT10     | 7.25         | 1.740799                | 1.755394 | 1.022748 | 0.375217 | NA       | NA       | 0.27  | 33.54                  | NA            | 46.37              | 0.26  | 0.66                    | 1.111899 | 1.732169 | 0.99425  | 0.323492 | NA       | NA        | 29.97    | 32.40 | NA    | 36.26 | 1.04  | 0.58 |
| F0V2V9     | Keratin, type I cytoskeletal 18                         | KRT18     | 6.25         | 1.55977                 | 1.488204 | 1.219056 | NA       | 0.695633 | NA       | 1.08  | NA                     | NA            | 27.47              | 1.24  | 0.59                    | 1.284368 | 1.255689 | 1.182774 | NA       | 1.205281 | NA        | 1.41     | NA    | 3.79  | 1.25  | 0.04  | 0.58 |
| P08727     | Keratin, type I cytoskeletal 19                         | KRT19     | 7.67         | NA                      | NA       | 0.744948 | 0.760374 | 0.87501  | NA       | NA    | 0.76                   | NA            | 5.99               | 0.07  | NA                      | NA       | 1.754672 | 1.446921 | 1.08121  | NA       | NA        | 15.03    | NA    | 25.58 | 14.43 | 0.34  | 0.44 |
| P05787     | Keratin, type II cytoskeletal 5                         | KRT5      | 17.50        | 1.785737                | 1.388262 | 1.527923 | 1.812191 | 1.052638 | 1.506304 | 19.36 | 13.89                  | 22.05         | 13.42              | 1.51  | 0.28                    | -1.86948 | 1.38205  | 1.605713 | 1.886236 | 0.998759 | 1.810548  | 23.67    | 11.52 | 38.77 | 10.76 | 1.60  | 0.35 |
| J9ID07     | Lamin B2, isoform CRA_a                                 | LMNB2     | 13.67        | -0.50932                | -0.53506 | -0.10327 | 0.191772 | -0.05943 | -0.35669 | 1.26  | 6.03                   | 33.78         | 23.67              | -0.42 | 0.38                    | -0.68123 | -0.40166 | -0.19449 | -0.00126 | -0.59128 | -0.18488  | 13.66    | 9.46  | 19.79 | 15.69 | -0.34 | 0.26 |
| P20700     | Lamin-B1                                                | LMNB1     | 10.67        | -0.35836                | -0.17389 | 0.392936 | 0.358453 | -0.75509 | 0.954853 | 9.03  | 1.69                   | 75.20         | 22.90              | 0.07  | 0.62                    | -0.46588 | -0.07068 | 0.332145 | 0.106735 | -0.98376 | -0.19245  | 19.25    | 16.50 | 37.84 | 16.50 | -0.30 | 0.26 |
| V9HWF2     | Malate dehydrogenase                                    | MDH1      | 8.83         | -0.59177                | -0.42545 | -0.51272 | -0.20123 | -0.67167 | -0.4262  | 8.14  | 15.21                  | 11.20         | 7.53               | -0.47 | 0.16                    | -0.75771 | -0.56711 | -0.45671 | -0.32907 | -0.70259 | -0.46791  | 9.33     | 6.25  | 12.35 | 9.80  | -0.55 | 0.17 |
| AOA024R407 | Microtubule-associated protein                          | MAP2      | 5.00         | -1.06791                | -0.55947 | 0.639152 | 0.50609  | -0.70364 | -0.26858 | 24.67 | 6.52                   | 21.26         | 52.68              | -0.24 | 0.68                    | -0.99694 | -0.46899 | 1.229713 | 0.158072 | -0.87244 | -0.23641  | 25.59    | 50.24 | 30.68 | 61.45 | -0.20 | 0.82 |
| ETVA90     | Microtubule-associated protein                          | MAP4      | 3.83         | -0.47445                | -0.1628  | -0.27929 | -0.77819 | 0.270633 | -1.40116 | 15.22 | 24.21                  | 73.85         | 7.28               | -0.47 | 0.57                    | -0.37897 | -0.28994 | 0.057304 | -1.17498 | 0.253805 | -0.42216  | 4.39     | 56.98 | 32.75 | 14.40 | -0.32 | 0.49 |
| AOA024R4M4 | Mitochondrial ribosomal protein 1B, isoform CRA_b       | MAR1B     | 24.67        | -0.24042                | -0.20874 | -0.79144 | -0.52325 | -0.4541  | -0.4207  | 3.94  | 12.42                  | 13.45         | 14.40              | -0.41 | 0.23                    | -0.44068 | -0.65599 | 0.125922 | -0.8095  | -0.18978 | -0.15478  | 10.53    | 0.69  | 1.72  | 22.24 | 0.21  | 0.49 |
| O9H936     | Mitochondrial ribosomal carrier 1                       | SLC25A22  | 3.00         | NA                      | NA       | -1.9095  | -0.31446 | -0.55883 | NA       | NA    | 11.95                  | NA            | 66.71              | -0.93 | 0.86                    | NA       | 1.69078  | -1.11015 | -0.64553 | NA       | NA        | 26.00    | NA    | 40.17 | -1.35 | 0.54  | 0.54 |
| Q1HBJ4     | Mitogen-activated protein kinase                        | MAPK1     | 2.75         | NA                      | NA       | 0.147517 | -0.26823 | -1.00933 | -0.71193 | NA    | 20.24                  | 14.52         | 35.58              | -0.46 | 0.51                    | NA       | NA       | -0.25904 | -0.13121 | -0.91625 | -0.137073 | NA       | 6.26  | 24.53 | 21.77 | -0.43 | 0.34 |
| P25189     | Myelin protein P0                                       | MPZ       | 3.00         | -0.6887                 | -1.00038 | NA       | NA       | -2.52587 | -1.89535 | 15.22 | NA                     | 30.42         | 61.34              | -1.53 | 0.84                    | -0.70104 | -1.13359 | NA       | -2.66117 | -0.91763 | 21.04     | NA       | 34.74 | 61.86 | -1.61 | 0.87  | 0.81 |
| J3QR53     | Myosin regulatory light chain 12A                       | MYL12A    | 7.33         | 0.364712                | 0.582429 | 0.194135 | 0.322855 | -0.05797 | 0.722278 | 10.65 | 6.30                   | 37.34         | 7.53               | 0.35  | 0.28                    | 0.701788 | 0.784989 | 0.803627 | 0.912616 | 0.740889 | 1.324033  | 4.08     | 5.34  | 28.21 | 11.30 | 0.88  | 0.23 |
| AOA024R1N1 | Myosin, heavy polypeptide 9, non-muscle, isoform CRA_a  | MYH9      | 23.00        | 0.80772                 | 1.391883 | 1.00278  | 0.681532 | 0.289513 | 0.159967 | 28.25 | 15.68                  | 63.35         | 29.87              | 0.72  | 0.46                    | 0.716398 | 1.117806 | 1.524849 | 1.114448 | 1.249635 | 0.980167  | 33.76    | 19.98 | 13.17 | 8.97  | 1.16  | 0.39 |
| P35580     | Myosin-10                                               | MYH10     | 10.17        | 1.357816                | 1.470366 | 0.552529 | 0.574781 | 0.442283 | 0.37564  | 5.51  | 1.09                   | 3.27          | 40.21              | 0.80  | 0.49                    | 1.376116 | 1.211269 | 0.285798 | 1.163715 | 0.740394 | 0.386223  | 8.07     | 41.75 | 17.27 | 26.61 | 0.86  | 0.46 |
| Q7Z406     | Myosin-14                                               | MYH14     | 5.50         | NA                      | 0.143703 | NA       | NA       | 0.929604 | NA       | NA    | NA                     | 37.59         | 5.04               | 0.56  | NA                      | 1.23256  | 0.305492 | 0.681272 | 0.461468 | 0.461468 | NA        | NA       | NA    | 20.19 | 5.54  | 0.29  | 0.29 |
| Q14745     | Naj(J)/H(+)-exchange regulatory cofactor NHE-RF1        | SLC9A3R1  | 4.82         | 1.385279                | 1.86852  | 1.280794 | 1.40678  | 1.6048   | 1.42337  | 23.47 | 6.11                   | 1.82          | 10.85              | 1.47  | 0.20                    | 1.407596 | 1.91543  | 1.841261 | 1.905157 | 1.435722 | 1.267986  | 24.64    | 3.13  | 8.21  | 17.71 | 1.63  | 0.29 |
| Q09646     | Neuroblast differentiation-associated protein AHNAK     | AHNAK     | 21.50        | 0.40732                 | 0.2145   | 0.17597  | 0.14069  | 0.45617  | -0.53056 | 5.19  | 1.73                   | 6.44          | 16.80              | -0.29 | 0.24                    | 0.058043 | 0.1892   | 0.64274  | 0.7941   | -0.0797  | 0.08045   | 9.68     | 6.31  | 0.66  | 0.21  | 0.41  |      |
| Q9LNNZ     | NSL1 cofactor p47                                       | NSL1C     | 9.50         | 0.714109                | 1.293634 | NA       | 1.21656  | 1.243448 | 28.03    | NA    | 10.66                  | 14.50         | 1.16               | 0.31  | 0.952325                | 1.465967 | NA       | NA       | 0.800515 | 1.123944 | 24.87     | NA       | 15.78 | 12.76 | 1.09  | 0.29  | 0.29 |
| P06748     | Nucleophosmin                                           | NPM1      | 7.67         | 0.599781                | 0.343483 | 1.322935 | 0.611135 | 0.635892 | 0.641333 | 12.53 | 34.20                  | 0.35          | 19.48              | 0.69  | 0.33                    | 0.658    |          |          |          |          |           |          |       |       |       |       |      |

| UniProt | Protein name                                             | Gene name | Peptide mean | 08/017 hESC-RPE to hRPE |          |          |          |          |          |                        |       |       |               | 08/023 hESC-RPE to hRPE |       |          |          |         |          |          |         |                        |      |       |               |                    |       |
|---------|----------------------------------------------------------|-----------|--------------|-------------------------|----------|----------|----------|----------|----------|------------------------|-------|-------|---------------|-------------------------|-------|----------|----------|---------|----------|----------|---------|------------------------|------|-------|---------------|--------------------|-------|
|         |                                                          |           |              | Analysis                |          |          |          |          |          | Technical replicate CV |       |       | Biological CV | Fold change (mean)      | StDev | Analysis |          |         |          |          |         | Technical replicate CV |      |       | Biological CV | Fold change (mean) | StDev |
|         |                                                          |           |              | 1.1                     | 1.2      | 2.1      | 2.2      | 3.1      | 3.2      | 1                      | 2     | 3     |               |                         |       | 1.1      | 1.2      | 2.1     | 2.2      | 3.1      | 3.2     | 1                      | 2    | 3     |               |                    |       |
| O9UM54  | Unconventional myosin-VI                                 | MYO6      | 1.50         | NA                      | NA       | -0.63828 | -1.10964 | -0.96499 | -1.16989 | NA                     | 22.90 | 10.03 | 10.23         | -0.97                   | 0.24  | NA       | NA       | -0.7018 | -0.72324 | -0.47061 | -1.6434 | NA                     | 1.05 | 54.51 | 11.18         | -0.88              | 0.52  |
| Q9PQL0  | Vesicle-associated membrane protein-associated protein A | VAPA      | 2.67         | 0.310029                | -0.13648 | NA       | -0.27619 | NA       | NA       | 21.71                  | NA    | NA    | 18.53         | -0.03                   | 0.31  | 0.502449 | -0.19684 | NA      | 0.089762 | NA       | NA      | 33.62                  | NA   | NA    | 5.14          | 0.13               | 0.35  |

Supplementary Table S7. The 83 proliferation and cell cycle proteins presented in Figure 4d. Differences in expression for both hESC-RPE lines compared to hRPE presented on log2 scale. Mean number of peptides used for quantification, fold change value for each replicate analysis, technical replicate CV, biological replicate CV, mean fold change, and standard deviation shown for each protein. Note! CV values are calculated using normal scale, not the log2 scale shown here. Differentially expressed proteins (>2-fold difference in expression i.e. values >1 and <-1 on log2 scale) marked with red color for upregulation and green color for downregulation.

| UniProt    | Protein name                                                                                            | Gene name | Peptide mean | 08/017 hESC-RPE to hRPE |          |          |          |          |          |                        |       |       |               |                    | 08/023 hESC-RPE to hRPE |           |          |          |          |           |          |                        |       |       |               |                    |       |      |
|------------|---------------------------------------------------------------------------------------------------------|-----------|--------------|-------------------------|----------|----------|----------|----------|----------|------------------------|-------|-------|---------------|--------------------|-------------------------|-----------|----------|----------|----------|-----------|----------|------------------------|-------|-------|---------------|--------------------|-------|------|
|            |                                                                                                         |           |              | Analysis                |          |          |          |          |          | Technical replicate CV |       |       | Biological CV | Fold change (mean) | StDev                   | Analysis  |          |          |          |           |          | Technical replicate CV |       |       | Biological CV | Fold change (mean) | StDev |      |
|            |                                                                                                         |           |              | 1.1                     | 1.2      | 2.1      | 2.2      | 3.1      | 3.2      | 1                      | 2     | 3     |               |                    |                         | 1.1       | 1.2      | 2.1      | 2.2      | 3.1       | 3.2      | 1                      | 2     | 3     |               |                    |       |      |
| P61981     | 14-3-3 protein gamma                                                                                    | YWHAG     | 8.67         | -0.27002                | -0.57918 | 0.147277 | -0.10255 | -1.99226 | -2.10735 | 15.10                  | 12.21 | 5.64  | 58.92         | -0.82              | 0.98                    | -0.01542  | -0.1718  | 0.166406 | -0.04407 | -0.27404  | -0.74559 | 7.66                   | 10.30 | 22.91 | 18.99         | -0.18              | 0.31  |      |
| P35998     | 26S protease regulatory subunit 7                                                                       | PSMC2     | 2.67         | 0.382338                | -0.523   | 1.035475 | 2.071931 | 0.280219 | 0.490949 | 42.97                  | 48.72 | 10.31 | 63.42         | 0.62               | 0.87                    | -0.23431  | 0.04063  | 1.255168 | 1.070065 | -0.00165  | 1.094688 | 13.43                  | 9.06  | 51.30 | 41.19         | 0.54               | 0.67  |      |
| P62195     | 26S protease regulatory subunit 8                                                                       | PSMC5     | 2.33         | 0.38445                 | -0.12236 | NA       | NA       | -0.22928 | NA       | 24.59                  | NA    | NA    | 18.64         | 0.01               | 0.33                    | 0.535922  | -0.08136 | NA       | NA       | 0.062322  | NA       | 29.80                  | NA    | NA    | 9.68          | -0.17              | 0.56  |      |
| O00231     | 26S proteasome non-ATPase regulatory subunit 11                                                         | PSMD11    | 3.00         | NA                      | NA       | NA       | 0.408966 | 0.075238 | NA       | NA                     | NA    | NA    | 16.28         | 0.24               | 0.24                    | NA        | NA       | NA       | -0.57904 | 0.219761  | NA       | NA                     | NA    | NA    | 38.18         | -0.18              | 0.32  |      |
| O00487     | 26S proteasome non-ATPase regulatory subunit 14                                                         | PSMD14    | 1.50         | NA                      | NA       | NA       | 0.098951 | 0.660863 | NA       | NA                     | NA    | NA    | 27.20         | 0.38               | 0.40                    | NA        | NA       | NA       | 0.137572 | 1.448961  | NA       | NA                     | NA    | NA    | 60.19         | 0.79               | 0.93  |      |
| P23396     | 40S ribosomal protein S3                                                                                | RPS3      | 5.50         | 0.368071                | 0.286259 | 0.250701 | 0.427314 | 0.435787 | 0.705996 | 4.01                   | 8.65  | 13.21 | 9.97          | 0.41               | 0.16                    | 0.309782  | 0.47424  | 0.295315 | 0.285072 | 0.533677  | 0.559221 | 8.05                   | 0.50  | 1.25  | 9.00          | 0.47               | 0.13  |      |
| P61160     | Actin-related protein 2                                                                                 | ACTR2     | 1.50         | 1.017997                | NA       | NA       | NA       | -0.5041  | NA       | NA                     | NA    | NA    | 68.37         | 0.26               | 1.08                    | 1.141303  | NA       | NA       | NA       | 0.04198   | NA       | NA                     | NA    | NA    | 51.42         | 0.59               | 0.78  |      |
| O6FGX9     | Adenylylation kinase isoenzyme 1                                                                        | AK1       | 5.67         | -0.40738                | -0.06226 | -0.04141 | -0.85812 | -0.77936 | -0.87628 | 16.84                  | 38.99 | 4.75  | 20.51         | -0.50              | 0.39                    | -0.2338   | 0.138164 | -0.19652 | -0.73663 | -0.47176  | -0.95874 | 18.13                  | 26.17 | 23.64 | 23.46         | -0.41              | 0.40  |      |
| P36405     | ADP-ribosylation factor-like protein 3                                                                  | ARL3      | 2.67         | 0.166224                | -0.13585 | NA       | NA       | NA       | -0.40415 | 14.75                  | NA    | NA    | 20.79         | -0.12              | 0.29                    | 0.711589  | -0.23238 | NA       | NA       | NA        | -0.36617 | 44.68                  | NA    | NA    | 32.80         | 0.04               | 0.59  |      |
| O5TZ29     | Annexin                                                                                                 | ANXA1     | 12.67        | 0.454789                | 0.563415 | -0.19253 | -0.46524 | -0.71576 | -0.50624 | 5.32                   | 13.33 | 10.25 | 42.52         | -0.14              | 0.53                    | 0.193686  | 0.344362 | 0.56637  | 0.372852 | 0.310761  | 0.399269 | 7.38                   | 9.47  | 4.34  | 7.06          | 0.36               | 0.12  |      |
| O5TZP7     | APXN1 nuclease (Multifunctional DNA repair enzyme) 1                                                    | APXN1     | 5.80         | -0.68237                | -0.72939 | 0.529209 | NA       | -0.90827 | -1.00737 | 2.30                   | NA    | NA    | 4.86          | -0.56              | 0.62                    | -0.17572  | -0.60851 | 0.106231 | NA       | -0.99566  | -0.74165 | 5.25                   | NA    | 12.42 | 77.47         | -0.41              | 0.81  |      |
| AOA024R3E3 | Apolipoprotein A-I, isoform CRA_a                                                                       | APOA1     | 2.33         | 2.671177                | 2.311736 | 1.794767 | 2.021072 | 0.964211 | 0.421314 | 15.50                  | 11.07 | 26.30 | 53.97         | 1.69               | 0.84                    | 2.171774  | 2.231446 | 1.251878 | 1.297959 | 2.388172  | 1.718489 | 2.92                   | 2.26  | 30.22 | 30.95         | -1.83              | 0.48  |      |
| P02649     | Apolipoprotein E                                                                                        | APOE      | 2.40         | NA                      | 0.463017 | -0.40071 | -0.26982 | -0.76788 | -0.13068 | NA                     | 6.41  | 30.73 | 36.02         | -0.22              | 0.45                    | NA        | 0.988607 | 1.12512  | -0.52104 | -0.22391  | 0.423736 | NA                     | 72.94 | 31.22 | 29.63         | 0.36               | 0.72  |      |
| AOA024RA11 | ARPP3 actin-related protein 3 homolog (Yeast), isoform CRA_a                                            | ACTR3     | 3.80         | 0.5114                  | 0.212651 | 0.379959 | 0.579905 | NA       | 0.387248 | 14.59                  | 9.78  | NA    | 4.29          | 0.41               | 0.14                    | -0.17497  | 0.825219 | 0.219909 | 0.381401 | NA        | 1.021042 | 47.15                  | 7.95  | NA    | 28.40         | 0.46               | 0.48  |      |
| Q12797     | Asparaginyl-beta-D-glucosylase                                                                          | ASBP      | 4.6          | 0.57878                 | -0.62675 | -0.11098 | -0.38078 | 0.22013  | -1.06416 | 2.35                   | 13.19 | 7.05  | 25.70         | -0.61              | 0.35                    | -0.05403  | -0.5632  | -0.21999 | -0.57904 | -0.36831  | 0.2476   | 7.07                   | 6.03  | 7.77  | 0.42          | 0.19               |       |      |
| O5SU16     | Beta 5-tubulin                                                                                          | TUBB5     | 51.33        | 0.363029                | 0.400538 | 0.549916 | 0.763949 | -0.2626  | -0.1428  | 1.84                   | 10.62 | 5.87  | 28.61         | 0.28               | 0.40                    | 0.079708  | 0.279032 | 0.698238 | 0.975697 | -0.239164 | 0.403484 | 9.75                   | 13.56 | 8.05  | 25.25         | 0.45               | 0.33  |      |
| V9WH88     | Calreticulin, isoform CRA_b                                                                             | CALR      | 20.17        | 0.842497                | 1.10416  | 0.762397 | 1.06445  | 0.940425 | 0.90047  | 12.79                  | 14.75 | 1.96  | 2.35          | 0.94               | 0.13                    | 0.906891  | 1.199803 | 0.707256 | 0.71664  | 0.239302  | 1.067036 | 14.31                  | 3.40  | 11.69 | 11.01         | 0.91               | 0.19  |      |
| P21964     | Catalase O-methyltransferase                                                                            | COMT      | 4.17         | -0.00296                | -0.03516 | 0.291553 | 0.388972 | 0.124156 | -0.58928 | 1.58                   | 4.77  | 34.27 | 19.24         | 0.03               | 0.34                    | -0.54076  | 0.341408 | 0.393751 | 0.321676 | -0.43663  | -0.6281  | 9.76                   | 3.53  | 9.37  | 32.82         | 0.09               | 0.49  |      |
| O6FHM9     | Cd59 antigen, complement regulatory protein, isoform CRA_b                                              | CDS5      | 2.00         | 0.87849                 | NA       | NA       | NA       | 0.16464  | NA       | NA                     | NA    | NA    | 14.29         | 0.52               | 0.50                    | -0.68866  | NA       | NA       | NA       | 0.942564  | NA       | NA                     | NA    | 12.41 | 0.82          | 0.18               | 0.48  |      |
| P41208     | Centrin-2                                                                                               | CENT2     | 1.25         | -0.96596                | -0.40696 | -0.42826 | NA       | 0.211498 | NA       | 27.06                  | NA    | NA    | 32.76         | -0.40              | 0.48                    | 0.234487  | -0.09189 | 0.537021 | NA       | 0.438166  | NA       | 15.93                  | NA    | 15.93 | 0.28          | 0.28               |       |      |
| O5SR73     | Chloride intracellular channel protein                                                                  | CLIC1     | 2.33         | 0.201574                | 0.197998 | 0.170543 | 0.032458 | 0.856059 | -0.08125 | 0.18                   | 6.76  | 44.39 | 13.18         | 0.23               | 0.33                    | -0.03302  | 0.18078  | -0.03743 | 0.131596 | 0.593555  | 0.303289 | 10.46                  | 8.27  | 14.18 | 16.35         | 0.19               | 0.24  |      |
| P10909     | Clustrin                                                                                                | CLU       | 3.00         | 0.022462                | -0.04884 | 0.232993 | 0.836901 | -0.18857 | NA       | 3.49                   | 29.17 | NA    | 28.71         | 0.17               | 0.40                    | 0.253361  | -0.55314 | 0.110103 | 0.807679 | -0.10179  | NA       | 38.53                  | 33.50 | NA    | 23.47         | -0.12              | 0.49  |      |
| O75367     | Core histone macro-H2A.1                                                                                | H2AFY     | 6.67         | -0.36798                | -0.6498  | 0.234346 | -0.10396 | -0.27523 | -0.39    | 13.77                  | 16.51 | 5.62  | 21.80         | -0.26              | 0.30                    | -0.30375  | -0.38142 | 0.720371 | -0.00835 | -0.29936  | -0.37114 | 3.81                   | 34.98 | 5.48  | 31.17         | 0.10               | 0.42  |      |
| Q14204     | Cytoplasmic dynein 1 heavy chain 1                                                                      | DYNC1H1   | 19.83        | -0.0077                 | 0.604321 | -0.38124 | 1.450071 | 0.06592  | 0.415921 | 29.55                  | 79.38 | 17.07 | 21.84         | 0.36               | 0.64                    | -0.00791  | 0.922597 | -0.80192 | 1.248047 | 0.365554  | 0.335884 | 44.09                  | 86.40 | 1.45  | 7.69          | 0.34               | 0.72  |      |
| P78527     | DNA-dependent protein kinase catalytic subunit                                                          | PKCK6     | 6.50         | -0.64218                | 0.24184  | 0.319222 | 0.138766 | 0.028582 | -0.36686 | 42.02                  | 8.93  | 17.67 | 15.67         | 0.05               | 0.38                    | 0.210069  | -0.74403 | -0.61991 | -0.2649  | 0.19143   | -0.38673 | 45.13                  | 17.12 | 27.96 | 12.46         | -0.27              | 0.40  |      |
| P13639     | Elongation factor 2                                                                                     | EEF2      | 13.67        | 0.923397                | 1.02176  | 0.157294 | 0.676922 | 0.698563 | 1.171199 | 4.82                   | 25.20 | 22.96 | 19.56         | 0.77               | 0.36                    | 1.022826  | 1.130535 | 0.91886  | 0.720622 | 0.88423   | 1.240613 | 5.28                   | 25.63 | 17.38 | 22.00         | 0.87               | 0.38  |      |
| V9HW22     | Epididymis luminal protein 33                                                                           | HSPAB     | 35.50        | -0.11382                | -0.19134 | 0.292852 | 0.243798 | 0.001188 | 0.037939 | 3.80                   | 2.40  | 1.80  | 14.81         | 0.05               | 0.19                    | -0.14317  | -0.14159 | 0.324818 | 0.431743 | -0.16732  | -0.16578 | 0.08                   | 4.38  | 0.08  | 22.86         | 0.03               | 0.28  |      |
| V9HW58     | Epididymis secretory protein Li 77                                                                      | DCTN2     | 4.20         | 0.239584                | 0.346322 | 0.111169 | -0.64484 | -0.46691 | NA       | 5.23                   | 36.23 | NA    | 27.75         | -0.08              | 0.44                    | -0.18515  | -0.26882 | -0.22729 | -0.14481 | -0.40645  | NA       | 4.10                   | 4.04  | NA    | 7.98          | -0.25              | 0.10  |      |
| P63241     | Eukaryotic translation initiation factor 5A-1                                                           | EIF5A     | 4.83         | -0.60968                | -1.78588 | 0.27872  | -0.239   | -1.22535 | -0.63705 | 54.65                  | 25.11 | 28.44 | 44.03         | 0.70               | 0.73                    | -0.59232  | -0.10273 | 0.372797 | 0.165066 | -0.16918  | -0.09595 | 23.77                  | 10.16 | 5.37  | 21.53         | -0.06              | 0.33  |      |
| Q16658     | Fascin                                                                                                  | FSCN1     | 2.75         | 0.970167                | NA       | -0.15663 | 0.064324 | -0.22225 | NA       | NA                     | 10.81 | NA    | 47.99         | 0.16               | 0.55                    | 0.165243  | NA       | 0.308862 | -0.20056 | 0.502488  | NA       | NA                     | 24.71 | NA    | 16.09         | 0.19               | 0.30  |      |
| O15540     | Fatty acid-binding protein, brain                                                                       | FABP7     | 2.00         | -0.58674                | -1.20179 | NA       | -0.44572 | -0.46575 | NA       | 29.70                  | NA    | NA    | 15.44         | -0.67              | 0.36                    | -0.87739  | -1.37398 | NA       | -0.63751 | -1.11869  | NA       | 24.10                  | NA    | NA    | 19.88         | -1.00              | 0.32  |      |
| O9UK22     | F-box only protein 2                                                                                    | FBOX2     | 1.25         | 1.623996                | NA       | 0.96363  | 0.250462 | NA       | 0.075111 | NA                     | 34.26 | NA    | 55.43         | 0.73               | 0.71                    | 1.447108  | NA       | 0.011594 | -0.52285 | NA        | -1.09205 | NA                     | 25.90 | NA    | 89.54         | -0.60              | 1.09  |      |
| O6ZVX7     | F-box only protein 50                                                                                   | NCRP1     | 2.33         | 1.517464                | 1.04244  | 1.845506 | 1.644994 | 0.70895  | 2.912346 | 23.06                  | 9.81  | 99.96 | 28.60         | 1.56               | 0.85                    | 2.369917  | 1.450086 | 0.052187 | 1.605343 | 0.454857  | 2.690511 | 43.58                  | 26.78 | 91.87 | 22.82         | 1.60               | 0.83  |      |
| P21333     | Flutamin A                                                                                              | FLU1A     | 38.83        | 1.279703                | 1.27822  | 1.027436 | 0.960179 | 0.79485  | 1.030971 | 0.07                   | 3.30  | 11.55 | 13.57         | 1.06               | 0.19                    | -1.270175 | 1.293218 | 1.450871 | 1.392843 | 1.132476  | 1.327719 | 1.13                   | 2.79  | 9.55  | 6.91          | 1.31               | 0.11  |      |
| P14136     | Glial fibrillary acidic protein                                                                         | GFAP      | 12.50        | NA                      | NA       | NA       | -0.44651 | NA       | -0.50568 | NA                     | NA    | NA    | 45.29         | -0.99              | 0.68                    | NA        | NA       | NA       | NA       | NA        | NA       | NA                     | NA    | NA    | NA            | 68.84              | -0.86 | 0.39 |
| AE1YX4     | Glutamine synthase                                                                                      | PGC59     | 10.83        | 1.116885                | -0.20791 | -1.24968 | -1.29362 | -1.9128  | 0.19128  | 60.72                  | 13.62 | 29.89 | 89.62         | -0.85              | 1.12                    | 1.009174  | -1.33552 | -0.79225 | -1.19969 | -0.90343  | -1.73095 | 53.34                  | 19.84 | 39.48 | 22.76         | -0.63              | 0.96  |      |
| AOA024RZ21 | Guanine nucleotide binding protein (G protein), alpha transducing activity polypeptide 1, isoform CRA_a | GNA11     | 25.83        | -1.88085                | -2.19197 | -0.30732 | -3.23807 | -2.34241 | -2.8922  | 15.54                  | 9.82  | 26.63 | 37.65         | -2.90              | 0.53                    | 1.924003  | -2.42514 | -2.50833 | -2.54883 | -2.55407  | -3.19661 | 24.32                  | 1.98  | 30.98 | 23.93         | -2.53              | 0.47  |      |
| AOA024R056 | Guanine nucleotide binding protein (G protein), beta polypeptide 1, isoform CRA_a                       | GNB1      | 36.50        | 1.24042                 | NA       | -0.21572 | NA       | NA       | NA       | NA                     | NA    | NA    | 43.49         | -1.70              | 0.65                    | -1.27165  | NA       | -1.9301  | NA       | NA        | NA       | NA                     | NA    | NA    | 31.72         | -1.60              | 0.47  |      |
| P04899     | Guanine nucleotide-binding protein G(i) subunit alpha-2                                                 | GNAI2     | 6.80         | 0.539571                | 0.43619  | 0.323253 | NA       | -0.70068 | 0.159588 | 5.06                   | NA    | 40.96 | 23.59         | 0.15               | 0.50                    | 0.32805   | 0.285916 | 0.015355 | NA       | -0.08189  | 0.981035 | 2.06                   | NA    | 49.86 | 18.15         | 0.37               | 0.42  |      |
| X5D945     | Harvey rat sarcoma viral oncogene protein isoform A (Fragmant)                                          | HRAS      | 1.00         | NA                      | -0.07061 | NA       | -0.54227 | NA       | NA       | NA                     | NA    | NA    | 22.91         | -0.31              | 0.33                    | NA        | NA       | NA       | 0.651962 | NA        | -0.10884 | NA                     | NA    | NA    | NA            | 36.45              | 0.21  | 0.54 |
| O5SS55     | Heterochromatin protein 1-binding protein (Fragmant)                                                    | H1PIB3    | 4.83         | -1.51297                | -1.2538  | -2.13756 | -2.00753 | -1.14556 | -1.33656 | 12.67                  | 6.37  | 9.35  | 28.10         | -1.57              | 0.41                    | -1.48079  | -1.02198 | -1.40353 | -1.4881  | -1.705    | -1.35025 | 22.30                  | 4.14  | 17.30 | 10.43         | -1.4               |       |      |

Supplementary Table S8. Proteins involved in detection of light stimulus and selected RPE proteins shown in Figure 5. Differences in expression for both hESC-RPE lines compared to hRPE presented on log<sub>2</sub> scale.

Mean number of peptides used for quantification, fold change value for each replicate analysis, technical replicate CV, biological replicate CV, mean fold change, and standard deviation shown for each protein. Note! CV values are calculated using normal scale, not the log<sub>2</sub> scale shown here. Differentially expressed proteins (>2-fold difference in expression i.e. values >1 and <-1 on log<sub>2</sub> scale) marked with red color for upregulation and green color for downregulation.

| Detection of light stimulus |                                                                                                         |           |              |                         |          |          |          |          |          |                        |       |       |               |                    |       |                         |          |          |          |          |          |                        |       |       |               |                    |       |
|-----------------------------|---------------------------------------------------------------------------------------------------------|-----------|--------------|-------------------------|----------|----------|----------|----------|----------|------------------------|-------|-------|---------------|--------------------|-------|-------------------------|----------|----------|----------|----------|----------|------------------------|-------|-------|---------------|--------------------|-------|
| UniProt                     | Protein name                                                                                            | Gene name | Peptide mean | 08/017 hESC-RPE to hRPE |          |          |          |          |          |                        |       |       |               |                    |       | 08/023 hESC-RPE to hRPE |          |          |          |          |          |                        |       |       |               |                    |       |
|                             |                                                                                                         |           |              | Analysis                |          |          |          |          |          | Technical replicate CV |       |       | Biological CV | Fold change (mean) | StDev | Analysis                |          |          |          |          |          | Technical replicate CV |       |       | Biological CV | Fold change (mean) | StDev |
|                             |                                                                                                         |           |              | 1.1                     | 1.2      | 2.1      | 2.2      | 3.1      | 3.2      | 1                      | 2     | 3     |               |                    |       | 1.1                     | 1.2      | 2.1      | 2.2      | 3.1      | 3.2      | 1                      | 2     | 3     |               |                    |       |
| P02489                      | Alpha-crystallin A chain                                                                                | CRYAA     | 9.67         | -1.10681                | -1.04082 | -2.43148 | -2.1051  | -1.53111 | -1.62654 | 3.23                   | 15.93 | 4.68  | 39.21         | -1.84              | 0.55  | -1.06636                | -1.02826 | -1.92145 | -1.96239 | -2.0942  | -1.89525 | 1.87                   | 2.01  | 9.83  | 39.66         | -1.66              | 0.48  |
| P02649                      | Apolipoprotein E                                                                                        | APOE      | 2.40         | NA                      | 0.463017 | -0.49271 | -0.26902 | -0.76789 | -0.13046 | NA                     | 6.41  | 39.73 | 36.02         | -0.22              | 0.45  | NA                      | 0.986007 | 1.15512  | -0.52104 | -0.22931 | 0.423736 | NA                     | 72.94 | 31.22 | 29.63         | 0.36               | 0.72  |
| P26575                      | Arrestin-3                                                                                              | ARR3      | 8.33         | -0.7526                 | -0.91057 | -0.66535 | -0.49131 | -0.73447 | -1.23626 | 7.73                   | 8.52  | 24.35 | 13.89         | -0.80              | 0.25  | -0.81477                | -0.89608 | -0.84173 | -0.25252 | -0.83433 | -1.073   | 3.98                   | 28.48 | 11.67 | 16.24         | -0.79              | 0.28  |
| AA0424RZ21                  | Guanine nucleotide binding protein (G protein), alpha transducing activity polypeptide 1, isoform CRA_a | GNA11     | 25.83        | -1.88085                | -2.19917 | -3.03732 | -3.23807 | -3.24241 | -2.8922  | 15.54                  | 9.82  | 26.63 | 37.65         | -2.40              | 0.53  | -1.92403                | -2.42514 | -2.50833 | -2.54883 | -2.55407 | -3.19661 | 24.32                  | 1.98  | 30.98 | 23.93         | -2.53              | 0.41  |
| O52797                      | Guanine nucleotide binding protein (G protein), alpha transducing activity polypeptide 2                | GNAI2     | 12.00        | NA                      | -1.53809 | -0.68951 | NA       | NA       | NA       | NA                     | NA    | NA    | 40.43         | -1.11              | 0.60  | NA                      | -2.08697 | -0.81879 | NA       | NA       | NA       | NA                     | NA    | NA    | 58.44         | -1.45              | 0.50  |
| P63211                      | Guanine nucleotide-binding protein (G) subunit gamma-T1                                                 | GNGT1     | 7.67         | -2.13723                | -2.4447  | -2.92436 | -3.24056 | -2.59344 | -2.40752 | 15.01                  | 15.44 | 9.10  | 26.46         | -2.62              | 0.40  | -2.36508                | -2.48063 | -2.70551 | -3.21895 | -2.83175 | -2.6281  | 5.66                   | 24.90 | 9.97  | 18.24         | -2.71              | 0.30  |
| Q17R60                      | Interphotoreceptor matrix proteoglycan 1                                                                | IMP1      | 4.80         | -0.69379                | -0.74267 | -2.21543 | -1.85193 | -1.19271 | NA       | 2.40                   | 17.72 | NA    | 42.04         | -1.34              | 0.68  | -0.92778                | -1.02736 | -2.11286 | -1.89608 | -0.84878 | NA       | 4.88                   | 10.61 | NA    | 37.55         | -1.26              | 0.59  |
| P04181                      | Ornithine aminotransferase, mitochondrial                                                               | OAT       | 3.33         | 0.034428                | 0.40025  | 0.550178 | 1.888438 | 0.980367 | 0.555263 | 17.83                  | 61.26 | 20.69 | 38.97         | 0.73               | 0.64  | -0.22046                | 0.084517 | 0.718681 | 1.12038  | 0.546192 | 0.098772 | 14.89                  | 19.56 | 21.76 | 35.20         | 0.39               | 0.49  |
| P20941                      | Phosducin                                                                                               | PDC       | 5.00         | -1.27287                | -0.69365 | -1.04769 | -0.95804 | -1.18253 | NA       | 28.01                  | 4.39  | NA    | 8.17          | -1.03              | 0.22  | -1.64995                | -0.68014 | -0.87848 | -0.98419 | -0.3309  | NA       | 45.82                  | 5.18  | NA    | 29.06         | -0.90              | 0.49  |
| Q07954                      | Prolow-density lipoprotein receptor-related protein 1                                                   | LRP1      | 2.50         | 0.66307                 | 0.675935 | -0.04332 | 0.42437  | 0.532895 | 0.159888 | 0.62                   | 22.72 | 18.20 | 16.65         | 0.40               | 0.29  | 0.696389                | 0.197595 | -0.02888 | -0.30674 | 0.982944 | 0.239435 | 24.21                  | 13.58 | 35.66 | 27.42         | 0.30               | 0.47  |
| Q82582                      | Regulator of G-protein signaling-9-binding protein                                                      | RGS9BP    | 3.00         | 0.001181                | -1.8708  | -1.08882 | -0.74026 | NA       | NA       | 90.73                  | 17.00 | NA    | 12.40         | -0.92              | 0.78  | -0.20068                | -0.89526 | NA       | NA       | NA       | -0.28046 | 33.40                  | NA    | NA    | 11.06         | -0.46              | 0.38  |
| P12271                      | Retinaldehyde-binding protein 1                                                                         | RALBP1    | 19.50        | -0.85143                | -0.83922 | -1.04934 | -0.91068 | -1.32655 | -1.45245 | 0.60                   | 6.79  | 6.17  | 18.67         | -1.07              | 0.26  | -0.8373                 | -0.7701  | -1.1841  | -1.14454 | -1.13222 | -0.86295 | 3.29                   | 1.94  | 13.16 | 12.52         | -0.99              | 0.18  |
| P7B363                      | Retinal-specific ATP-binding cassette transporter                                                       | ABCA4     | 23.00        | -0.59029                | -0.29793 | -1.20439 | -1.87592 | -0.25724 | -2.21216 | 14.28                  | 32.33 | 83.43 | 35.81         | -1.07              | 0.83  | -1.27589                | -0.31303 | -1.23204 | -1.6753  | 0.170454 | 0.69376  | 45.52                  | 21.56 | 41.14 | 40.75         | -0.84              | 0.69  |
| Q16518                      | Retinoid isomerase                                                                                      | RPE65     | 24.67        | -2.31095                | -2.40194 | -3.02432 | -2.82179 | -2.6966  | -2.3266  | 4.46                   | 9.91  | 18.04 | 19.32         | -2.60              | 0.30  | -2.48018                | -2.37398 | -3.01347 | -2.94966 | -2.64686 | -2.2344  | 5.20                   | 3.13  | 20.08 | 20.64         | -2.62              | 0.31  |
| O8TC12                      | Retinol dehydrogenase 11                                                                                | RDH11     | 4.00         | -0.35634                | -0.60292 | -0.756   | -0.72536 | -0.10576 | -0.1664  | 12.06                  | 1.50  | 2.97  | 21.15         | -0.45              | 0.28  | -0.57655                | -0.74256 | -0.66522 | -1.04641 | -0.03792 | -0.44967 | 8.13                   | 18.58 | 20.05 | 22.52         | -0.59              | 0.34  |
| P10745                      | Retinol-binding protein 3                                                                               | RBP3      | 23.67        | -2.2667                 | -1.0768  | -1.76093 | -1.6656  | -1.88047 | -2.15628 | 55.22                  | 4.67  | 13.48 | 15.74         | -1.80              | 0.42  | -2.44873                | -1.2085  | -1.94952 | -1.54514 | -1.85102 | -2.31733 | 57.30                  | 19.69 | 22.66 | 13.43         | -1.89              | 0.47  |
| O15537                      | Retinoschisin                                                                                           | RST       | 3.80         | -0.74697                | -0.54167 | -1.40597 | -1.05166 | NA       | -0.52117 | 10.05                  | 17.28 | NA    | 23.90         | -0.85              | 0.38  | -0.3272                 | -1.25718 | -0.19362 | -1.32243 | NA       | -0.78895 | 44.07                  | 52.67 | NA    | 4.80          | -0.78              | 0.52  |
| O15835                      | Rhodopsin kinase                                                                                        | GRK1      | 6.17         | -0.7526                 | -0.71904 | -1.15339 | -0.83255 | 1.006629 | -0.61048 | 1.64                   | 15.66 | 71.67 | 55.45         | -0.51              | 0.76  | -1.13593                | -0.82487 | -0.90762 | -1.18815 | -0.82881 | -0.56181 | 15.19                  | 13.71 | 13.05 | 13.30         | -0.91              | 0.23  |
| P18499                      | Rod cGMP-specific 3',5'-cyclic phosphodiesterase subunit alpha                                          | PDE6A     | 16.67        | -1.19625                | -1.05101 | -1.76093 | -1.49496 | -0.80233 | -1.02378 | 7.21                   | 13.27 | 13.69 | 23.94         | -1.22              | 0.35  | -1.40282                | -0.90307 | -1.57236 | -1.65291 | -0.45239 | -1.39741 | 24.25                  | 3.95  | 44.73 | 25.63         | -1.23              | 0.46  |
| P35913                      | Rod cGMP-specific 3',5'-cyclic phosphodiesterase subunit beta                                           | PDE6B     | 13.17        | -1.48295                | -1.20485 | -1.79916 | -1.8682  | -2.15332 | -1.80645 | 13.59                  | 3.38  | 16.91 | 24.11         | -1.72              | 0.33  | -1.6153                 | -1.28323 | -1.61591 | -1.60376 | -2.01434 | -1.77057 | 16.20                  | 0.60  | 11.92 | 15.33         | -1.65              | 0.24  |
| Q03395                      | Rod outer segment membrane protein 1                                                                    | ROM1      | 6.83         | -0.35609                | -0.71779 | -1.78174 | -2.03104 | -0.14047 | -0.26858 | 17.64                  | 12.19 | 6.28  | 50.66         | -0.88              | 0.82  | -0.5603                 | -0.89403 | -1.90999 | -2.04433 | -1.56749 | -0.69758 | 16.28                  | 6.58  | 41.39 | 40.07         | -1.28              | 0.64  |
| P47804                      | RPE-retinal G protein-coupled receptor                                                                  | RGR       | 6.83         | -1.64711                | -1.27523 | -1.78265 | -2.11992 | -0.76124 | -1.16513 | 18.13                  | 16.46 | 19.67 | 33.94         | -1.46              | 0.49  | -1.55482                | -1.41734 | -1.64174 | -2.03396 | -0.59097 | -0.81132 | 6.90                   | 19.11 | 10.78 | 41.88         | -1.34              | 0.54  |

| Extracellular matrix |                                   |           |              |                         |          |          |          |          |          |                        |       |       |               |                    |       |                         |          |          |          |          |          |                        |       |       |               |                    |       |      |
|----------------------|-----------------------------------|-----------|--------------|-------------------------|----------|----------|----------|----------|----------|------------------------|-------|-------|---------------|--------------------|-------|-------------------------|----------|----------|----------|----------|----------|------------------------|-------|-------|---------------|--------------------|-------|------|
| UniProt              | Protein name                      | Gene name | Peptide mean | 08/017 hESC-RPE to hRPE |          |          |          |          |          |                        |       |       |               |                    |       | 08/023 hESC-RPE to hRPE |          |          |          |          |          |                        |       |       |               |                    |       |      |
|                      |                                   |           |              | Analysis                |          |          |          |          |          | Technical replicate CV |       |       | Biological CV | Fold change (mean) | StDev | Analysis                |          |          |          |          |          | Technical replicate CV |       |       | Biological CV | Fold change (mean) | StDev |      |
|                      |                                   |           |              | 1.1                     | 1.2      | 2.1      | 2.2      | 3.1      | 3.2      | 1                      | 2     | 3     |               |                    |       | 1.1                     | 1.2      | 2.1      | 2.2      | 3.1      | 3.2      | 1                      | 2     | 3     |               |                    |       |      |
| P09382               | Galactin-1                        | LGAL1     | 6.83         | 0.763182                | 0.70359  | 0.594034 | 0.297339 | 0.751501 | 0.874264 | 2.92                   | 14.49 | 6.01  | 12.70         | 0.66               | 0.20  | 0.638025                | 0.687653 | 1.158265 | 0.737521 | 1.134361 | 1.219714 | 2.43                   | 20.48 | 4.18  | 17.59         | 0.93               | 0.27  |      |
| Q08380               | Galactin-3-binding protein        | LGAL3BP   | 5.20         | 1.58896                 | 1.811201 | NA       | 0.254445 | 1.024296 | 1.362343 | 10.87                  | NA    | 16.49 | 45.92         | 1.21               | 0.61  | 1.008303                | 0.7056   | NA       | 0.142839 | 0.583239 | 2.584213 | 14.78                  | NA    | 84.88 | 61.46         | 1.00               | 0.94  |      |
| AA0424R8T0           | Integrin beta                     | ITGB6     | 2.20         | 1.472631                | 1.594171 | 1.434225 | 2.570083 | NA       | 1.935328 | 5.95                   | 52.96 | NA    | 19.63         | 1.80               | 0.47  | 1.325605                | 1.081709 | 0.975238 | 2.058359 | NA       | 2.515708 | 11.93                  | 51.49 | NA    | 48.50         | 1.59               | 0.67  |      |
| P05556               | Integrin beta-1                   | ITGB1     | 2.33         | 0.149462                | -0.28122 | 0.62839  | 0.613721 | 0.735134 | 0.260371 | 20.95                  | 0.72  | 23.06 | 23.18         | 0.35               | 0.39  | -0.25717                | -0.68085 | 0.93993  | 0.76182  | 0.983781 | 0.313317 | 20.62                  | 8.46  | 32.28 | NA            | 41.57              | 0.61  | 0.67 |
| P26012               | Integrin beta-8                   | ITGB8     | 2.75         | NA                      | 0.56944  | -0.4347  | 1.024704 | NA       | -0.2138  | NA                     | 66.00 | NA    | 26.88         | 0.24               | 0.68  | NA                      | 0.442323 | -0.43877 | 0.742959 | NA       | -0.28274 | NA                     | 54.88 | NA    | 24.64         | 0.11               | 0.57  |      |
| L7RXH0               | Integrin, alpha V                 | ITGAV     | 7.50         | 0.720813                | 0.426053 | 0.602438 | 0.157323 | 0.838343 | 0.658794 | 14.40                  | 21.64 | 8.79  | 12.23         | 0.57               | 0.24  | 0.716264                | 0.766235 | 0.62317  | 0.033178 | 0.528812 | 0.463717 | 2.45                   | 28.52 | 3.19  | 13.66         | 0.52               | 0.26  |      |
| Q5KNX8               | Intercellular adhesion molecule 1 | ICAM1     | 2.83         | 1.480483                | 1.705221 | 1.145721 | 0.670808 | 0.612402 | 1.237177 | 10.99                  | 23.07 | 30.15 | 27.82         | 1.14               | 0.43  | 1.687572                | 2.235523 | 1.899533 | 1.475243 | 0.779106 | 1.448814 | 26.54                  | 20.65 | 32.25 | 27.83         | 1.59               | 0.49  |      |
| AA0807WW04           | Neural cell adhesion molecule 1   | NCAM1     | 9.33         | -1.64157                | -1.37608 | -1.16463 | -1.99172 | -1.59852 | -1.40415 | 12.98                  | 39.46 | 19.51 | 0.79          | -1.13              | 0.28  | -1.60994                | -1.32237 | -1.1156  | -1.61918 | -1.89111 | -1.65219 | 15.05                  | 24.43 | 9.56  | 15.42         | -0.54              | 0.28  |      |
| O9Y490               | Talin-1                           | TLM1      | 12.67        | 0.71219                 | 1.513624 | 0.949289 | 1.809034 | 0.997622 | 1.045696 | 37.89                  | 40.93 | 2.36  | 15.03         | 1.17               | 0.41  | 0.899862                | 0.95615  | 0.650002 | 1.529835 | 1.094343 | 1.168056 | 2.76                   | 45.60 | 3.61  | 7.85          | 1.04               | 0.32  |      |
| D9ZGG2               | Vitronectin                       | VTN       | 2.00         | -0.06461                | NA       | -1.42221 | -0.94073 | NA       | NA       | NA                     | 23.38 | NA    | 51.03         | -0.81              | 0.69  | -0.07303                | NA       | -1.07559 | -0.93318 | NA       | NA       | NA                     | 6.97  | NA    | 44.05         | -0.69              | 0.54  |      |

| Pigmentation |                                               |           |              |                         |          |          |          |          |          |                        |       |       |               |                    |       |                         |          |          |          |          |          |                        |       |       |               |                    |       |
|--------------|-----------------------------------------------|-----------|--------------|-------------------------|----------|----------|----------|----------|----------|------------------------|-------|-------|---------------|--------------------|-------|-------------------------|----------|----------|----------|----------|----------|------------------------|-------|-------|---------------|--------------------|-------|
| UniProt      | Protein name                                  | Gene name | Peptide mean | 08/017 hESC-RPE to hRPE |          |          |          |          |          |                        |       |       |               |                    |       | 08/023 hESC-RPE to hRPE |          |          |          |          |          |                        |       |       |               |                    |       |
|              |                                               |           |              | Analysis                |          |          |          |          |          | Technical replicate CV |       |       | Biological CV | Fold change (mean) | StDev | Analysis                |          |          |          |          |          | Technical replicate CV |       |       | Biological CV | Fold change (mean) | StDev |
|              |                                               |           |              | 1.1                     | 1.2      | 2.1      | 2.2      | 3.1      | 3.2      | 1                      | 2     | 3     |               |                    |       | 1.1                     | 1.2      | 2.1      | 2.2      | 3.1      | 3.2      | 1                      | 2     | 3     |               |                    |       |
| P17463       | 5,6-dihydroxyindole-2-carboxylic acid oxidase | TYRP1     | 5.00         | 1.903488                | 1.885831 | 0.852643 | 1.555717 | 0.947329 | 1.357277 | 0.87                   | 33.79 | 19.96 | 29.37         | 1.42               | 0.45  | 1.238022                | 1.159827 | 0.815897 | 0.686062 | 0.527665 | 1.128748 | 3.83                   | 6.36  | 29.04 | 16.69         | 0.93               | 0.29  |
| P36955       | Pigment epithelium-derived factor             | SERPINF1  | 3.17         | 0.815571                | 1.024376 | 0.644927 | 0.269614 | 0.412975 | 0.25185  | 10.22                  | 18.29 | 7.89  | 22.27         | 0.57               | 0.31  | 0.730729                | 0.683406 | 0.197634 | 0.607249 | 0.361375 | 2.000993 | 2.32                   | 19.94 | 9.04  | 15.37         | 0.46               | 0.24  |

| Phagocytosis |                                                           |           |              |                         |          |          |          |          |          |                        |      |      |               |                    |       |                         |     |     |     |     |     |                        |   |   |               |                    |       |
|--------------|-----------------------------------------------------------|-----------|--------------|-------------------------|----------|----------|----------|----------|----------|------------------------|------|------|---------------|--------------------|-------|-------------------------|-----|-----|-----|-----|-----|------------------------|---|---|---------------|--------------------|-------|
| UniProt      | Protein name                                              | Gene name | Peptide mean | 08/017 hESC-RPE to hRPE |          |          |          |          |          |                        |      |      |               |                    |       | 08/023 hESC-RPE to hRPE |     |     |     |     |     |                        |   |   |               |                    |       |
|              |                                                           |           |              | Analysis                |          |          |          |          |          | Technical replicate CV |      |      | Biological CV | Fold change (mean) | StDev | Analysis                |     |     |     |     |     | Technical replicate CV |   |   | Biological CV | Fold change (mean) | StDev |
|              |                                                           |           |              | 1.1                     | 1.2      | 2.1      | 2.2      | 3.1      | 3.2      | 1                      | 2    | 3    |               |                    |       | 1.1                     | 1.2 | 2.1 | 2.2 | 3.1 | 3.2 | 1                      | 2 | 3 |               |                    |       |
| V9HW3        | Cathepsin D (Lysosomal aspartyl peptidase), isoform CRA_a | CTSD      | 36.67        | -0.49983                | -0.59917 | -1.03027 | -1.03482 | -0.13724 | -0.14155 | 4.87                   | 0.22 | 0.21 | 30.24         | -0.57              | 0.40  | -0.5599                 |     |     |     |     |     |                        |   |   |               |                    |       |
